# Supplementary material for: Gene Expression Profiling of Pulmonary Artery in a Rabbit Model of Pulmonary Thromboembolism
Source: PLoS One. 2016 Oct 31;11(10):e0164530. doi: 10.1371/journal.pone.0164530 (PMC5087918; doi:10.1371/journal.pone.0164530)
Supplement: S2 Data — (XLS) [file pone.0164530.s008.xls]

## Sheet: GO
Class	Description	Accession	Gene count	Enrichment	P value	Gene names	Gene IDs	Source ID	Source ID	Total count	Up (Ensembl)	Gene count	Up (Entrez)	Gene count	Source ID	Total count	Down (Ensembl)	Gene count	Down (Entrez)	Gene count
biological process	immune response	GO:0006955	220	1.8	3.82e-19	UNC93B1;PTAFR;CD200R1;ADAMDEC1;LCN2;CCL19;CD40LG;CD3E;MS4A2;TNFAIP8L2;TAP1;SLAMF7;S100A8;GATA3;IL18;IL1A;MAPK14;IDO1;HLA-DPA1;IL12A;SH2D1A;TGFBR3;PSMB8;MMP7;CD247;C1RL;DUSP10;ZEB1;TINAGL1;TLR4;SRPK2;C3;DEFA4;ITGB7;ITGAL;GZMA;USP18;IL2;BTK;CBLB;HLA-DMB;TNFSF10;VEGFA;HCK;CD36;MEFV;CDK1;LCP1;CXADR;ITGB2;CXCL5;ENPP1;LEF1;NCKAP1L;KYNU;IL8;NOD2;PTK2B;DPP4;VCAM1;CLU;HLA-DRA;VIPR1;DDX58;HCST;AMICA1;EGR1;…	81622;5724;131450;27299;3934;6363;959;916;2206;79626;6890;57823;6279;2625;3606;3552;1432;3620;3113;3592;4068;7049;5696;4316;919;51279;11221;6935;64129;7099;6733;718;1669;3695;3683;3001;11274;3558;695;868;3109;8743;7422;3055;948;4210;983;3936;1525;3689;6374;5167;51176;3071;8942;3576;64127;2185;1803;7412;1191;3122;7433;23586;10870;120425;1958;3958;729;2;917;727;944;939;11005;1281;8809;913;7318;2910…	ENSG00000110057;ENSG00000169403;ENSG00000163606;ENSG00000134028;ENSG00000148346;ENSG00000172724;ENSG00000102245;ENSG00000198851;ENSG00000149534;ENSG00000163154;ENSG00000168394;ENSG00000026751;ENSG00000143546;ENSG00000107485;ENSG00000150782;ENSG00000115008;ENSG00000112062;ENSG00000131203;ENSG00000231389;ENSG00000168811;ENSG00000183918;ENSG00000069702;ENSG00000204264;ENSG00000137673;ENSG00000198821…	ENSG00000110057;ENSG00000169403;ENSG00000163606;ENSG00000134028;ENSG00000148346;ENSG00000172724;ENSG00000102245;ENSG00000198851;ENSG00000149534;ENSG00000163154;ENSG00000168394;ENSG00000026751;ENSG00000143546;ENSG00000107485;ENSG00000150782;ENSG00000115008;ENSG00000112062;ENSG00000131203;ENSG00000231389;ENSG00000168811;ENSG00000183918;ENSG00000069702;ENSG00000204264;ENSG00000137673;ENSG00000198821…	220	ENSG00000110057;ENSG00000169403;ENSG00000163606;ENSG00000134028;ENSG00000148346;ENSG00000172724;ENSG00000102245;ENSG00000198851;ENSG00000149534;ENSG00000163154;ENSG00000168394;ENSG00000026751;ENSG00000143546;ENSG00000107485;ENSG00000150782;ENSG00000115008;ENSG00000112062;ENSG00000131203;ENSG00000231389;ENSG00000168811;ENSG00000183918;ENSG00000204264;ENSG00000137673;ENSG00000198821;ENSG00000139178…	202	81622;5724;131450;27299;3934;6363;959;916;2206;79626;6890;57823;6279;2625;3606;3552;1432;3620;3113;3592;4068;5696;4316;919;51279;7099;718;1669;3695;3683;3001;11274;3558;695;868;3109;8743;7422;3055;948;4210;983;3936;1525;3689;6374;51176;3071;8942;3576;64127;2185;7412;1191;3122;7433;23586;10870;120425;3958;729;2;917;727;944;939;8809;7318;29108;653361;361;10379;50852;915;5551;834;735;4602;1493;10563…	202	ENSG00000110057;ENSG00000169403;ENSG00000163606;ENSG00000134028;ENSG00000148346;ENSG00000172724;ENSG00000102245;ENSG00000198851;ENSG00000149534;ENSG00000163154;ENSG00000168394;ENSG00000026751;ENSG00000143546;ENSG00000107485;ENSG00000150782;ENSG00000115008;ENSG00000112062;ENSG00000131203;ENSG00000231389;ENSG00000168811;ENSG00000183918;ENSG00000069702;ENSG00000204264;ENSG00000137673;ENSG00000198821…	220	ENSG00000069702;ENSG00000143507;ENSG00000148516;ENSG00000142910;ENSG00000135250;ENSG00000197594;ENSG00000197635;ENSG00000120738;ENSG00000133710;ENSG00000168542;ENSG00000158488;ENSG00000119699;ENSG00000171150;ENSG00000124882;ENSG00000181634;ENSG00000180209;ENSG00000170345;ENSG00000164949	18	7049;11221;6935;64129;6733;5167;1803;1958;11005;1281;913;7043;9655;2069;9966;29895;2353;2669	18
biological process	response to stimulus	GO:0050896	954	1.2	6.07e-16	P2RY4;ADAMDEC1;RYR1;CD40LG;PYGM;DNAJC3;SLC25A13;AQP1;CCNO;PKIG;IL18;FGG;HAS2;CCNE1;CMTM6;WEE1;SH2D1A;TGFBR3;MMP7;UBE2T;EDEM1;CLDN4;MANF;PSD;TINAGL1;RAB33A;MOB1A;CPE;BOC;MEIS2;RHOBTB3;RAD1;SMAD9;RSPO1;CAP2;BTK;PTPLA;HLA-DMB;AKAP12;KDELR3;KCNA5;TNFSF10;CD36;TRIM63;PON1;LCP1;ASB4;MYH11;RBP4;APOH;CD68;ENPP1;FBP1;NOD2;TPM1;SCN5A;KLB;SHC4;CLSPN;CXCR7;SELP;GLRB;CD3G;SP110;TJP1;GPSM2;ITGB5;APH1B;MIP;ELF3…	5030;27299;6261;959;5837;5611;10165;358;10309;11142;3606;2266;3037;898;54918;7465;4068;7049;4316;29089;9695;1364;7873;5662;64129;9363;55233;1363;91653;4212;22836;5810;4093;284654;10486;695;9200;3109;9590;11015;3741;8743;948;84676;5444;3936;51666;4629;5950;350;968;5167;2203;64127;7168;6331;152831;399694;63967;57007;6403;2743;917;3431;7082;29899;3693;83464;4284;1999;9414;8048;195814;5880;5146;783;5…	ENSG00000186912;ENSG00000134028;ENSG00000196218;ENSG00000102245;ENSG00000068976;ENSG00000102580;ENSG00000004864;ENSG00000240583;ENSG00000152669;ENSG00000168734;ENSG00000150782;ENSG00000171557;ENSG00000170961;ENSG00000105173;ENSG00000091317;ENSG00000166483;ENSG00000183918;ENSG00000069702;ENSG00000137673;ENSG00000077152;ENSG00000134109;ENSG00000189143;ENSG00000145050;ENSG00000059915;ENSG00000142910…	ENSG00000186912;ENSG00000134028;ENSG00000196218;ENSG00000102245;ENSG00000068976;ENSG00000102580;ENSG00000004864;ENSG00000240583;ENSG00000152669;ENSG00000168734;ENSG00000150782;ENSG00000171557;ENSG00000170961;ENSG00000105173;ENSG00000091317;ENSG00000166483;ENSG00000183918;ENSG00000069702;ENSG00000137673;ENSG00000077152;ENSG00000134109;ENSG00000189143;ENSG00000145050;ENSG00000059915;ENSG00000142910…	954	ENSG00000186912;ENSG00000134028;ENSG00000102245;ENSG00000102580;ENSG00000004864;ENSG00000152669;ENSG00000150782;ENSG00000171557;ENSG00000105173;ENSG00000091317;ENSG00000183918;ENSG00000137673;ENSG00000077152;ENSG00000134109;ENSG00000189143;ENSG00000145050;ENSG00000114978;ENSG00000113456;ENSG00000169218;ENSG00000010671;ENSG00000242574;ENSG00000121858;ENSG00000135218;ENSG00000005421;ENSG00000136167…	575	5030;27299;959;5611;10165;10309;3606;2266;898;54918;4068;4316;29089;9695;1364;7873;55233;5810;284654;695;3109;8743;948;5444;3936;51666;968;2203;64127;152831;63967;6403;917;3431;83464;1999;9414;195814;5880;5146;5174;6439;6489;9961;834;4602;9470;4860;6775;3158;10203;2201;6098;5873;25928;255189;5888;23063;84649;6790;716;245972;7222;1381;5294;5741;9824;2054;21;523;6375;8601;1555;3937;3162;3925;10225;…	575	ENSG00000186912;ENSG00000134028;ENSG00000196218;ENSG00000102245;ENSG00000068976;ENSG00000102580;ENSG00000004864;ENSG00000240583;ENSG00000152669;ENSG00000168734;ENSG00000150782;ENSG00000171557;ENSG00000170961;ENSG00000105173;ENSG00000091317;ENSG00000166483;ENSG00000183918;ENSG00000069702;ENSG00000137673;ENSG00000077152;ENSG00000134109;ENSG00000189143;ENSG00000145050;ENSG00000059915;ENSG00000142910…	954	ENSG00000196218;ENSG00000068976;ENSG00000240583;ENSG00000168734;ENSG00000170961;ENSG00000166483;ENSG00000069702;ENSG00000059915;ENSG00000142910;ENSG00000134594;ENSG00000109472;ENSG00000144857;ENSG00000134138;ENSG00000164292;ENSG00000120693;ENSG00000112186;ENSG00000165996;ENSG00000131016;ENSG00000100196;ENSG00000130037;ENSG00000158022;ENSG00000133392;ENSG00000138207;ENSG00000091583;ENSG00000197594…	380	6261;5837;358;11142;3037;7465;7049;5662;64129;9363;1363;91653;4212;22836;4093;10486;9200;9590;11015;3741;84676;4629;5950;350;5167;7168;6331;152831;399694;57007;2743;7082;29899;3693;4284;8048;783;3913;178;3624;1429;6262;1374;3931;51301;9982;1278;5309;84532;1000;2045;79658;10058;3316;4921;23011;65266;8611;51339;5149;80114;2941;80254;57514;4620;4015;2191;91807;1292;7481;85461;25937;5066;51495;9966;7…	380
biological process	regulation of immune response	GO:0050776	133	2.02	1.07e-15	UNC93B1;CD200R1;CCL19;CD40LG;CD3E;MS4A2;TAP1;GATA3;MAPK14;IDO1;HLA-DPA1;IL12A;SH2D1A;CD247;C1RL;DUSP10;TLR4;C3;ITGB7;ITGAL;USP18;IL2;BTK;CBLB;HCK;CD36;CDK1;CXADR;ITGB2;NCKAP1L;NOD2;DPP4;VCAM1;CLU;HLA-DRA;DDX58;HCST;AMICA1;C6;CD3G;A2M;C5;SPINK5;COL3A1;PYCARD;TGFB3;TRAT1;CD3D;MYB;SOCS5;C9;CXCL13;CTLA4;CD79B;CD38;FCGR3A;CR1;NFKBIA;EREG;C1S;IFIH1;IRF1;CYLD;KLHL6;IL15;XCL1;APOA2;STXBP2;LCP2;TLR10;LYN;…	81622;131450;6363;959;916;2206;6890;2625;1432;3620;3113;3592;4068;919;51279;11221;7099;718;3695;3683;11274;3558;695;868;3055;948;983;1525;3689;3071;64127;1803;7412;1191;3122;23586;10870;120425;729;917;2;727;11005;1281;29108;7043;50852;915;4602;9655;735;10563;1493;974;952;2214;1378;4792;2069;716;64135;3659;1540;89857;3600;6375;336;6813;3937;81793;4067;3162;10225;7098;3902;5336;1997;717;841;4791;64…	ENSG00000110057;ENSG00000163606;ENSG00000172724;ENSG00000102245;ENSG00000198851;ENSG00000149534;ENSG00000168394;ENSG00000107485;ENSG00000112062;ENSG00000131203;ENSG00000231389;ENSG00000168811;ENSG00000183918;ENSG00000198821;ENSG00000139178;ENSG00000143507;ENSG00000136869;ENSG00000125730;ENSG00000139626;ENSG00000005844;ENSG00000184979;ENSG00000109471;ENSG00000010671;ENSG00000114423;ENSG00000101336…	ENSG00000110057;ENSG00000163606;ENSG00000172724;ENSG00000102245;ENSG00000198851;ENSG00000149534;ENSG00000168394;ENSG00000107485;ENSG00000112062;ENSG00000131203;ENSG00000231389;ENSG00000168811;ENSG00000183918;ENSG00000198821;ENSG00000139178;ENSG00000143507;ENSG00000136869;ENSG00000125730;ENSG00000139626;ENSG00000005844;ENSG00000184979;ENSG00000109471;ENSG00000010671;ENSG00000114423;ENSG00000101336…	133	ENSG00000110057;ENSG00000163606;ENSG00000172724;ENSG00000102245;ENSG00000198851;ENSG00000149534;ENSG00000168394;ENSG00000107485;ENSG00000112062;ENSG00000131203;ENSG00000231389;ENSG00000168811;ENSG00000183918;ENSG00000198821;ENSG00000139178;ENSG00000136869;ENSG00000125730;ENSG00000139626;ENSG00000005844;ENSG00000184979;ENSG00000109471;ENSG00000010671;ENSG00000114423;ENSG00000101336;ENSG00000135218…	125	81622;131450;6363;959;916;2206;6890;2625;1432;3620;3113;3592;4068;919;51279;7099;718;3695;3683;11274;3558;695;868;3055;948;983;1525;3689;3071;64127;7412;1191;3122;23586;10870;120425;729;917;2;727;29108;50852;915;4602;735;10563;1493;974;952;2214;1378;4792;716;64135;3659;1540;89857;3600;6375;336;6813;3937;81793;4067;3162;10225;7098;3902;5336;1997;717;841;4791;64092;149233;330;8993;5588;26191;929;56…	125	ENSG00000110057;ENSG00000163606;ENSG00000172724;ENSG00000102245;ENSG00000198851;ENSG00000149534;ENSG00000168394;ENSG00000107485;ENSG00000112062;ENSG00000131203;ENSG00000231389;ENSG00000168811;ENSG00000183918;ENSG00000198821;ENSG00000139178;ENSG00000143507;ENSG00000136869;ENSG00000125730;ENSG00000139626;ENSG00000005844;ENSG00000184979;ENSG00000109471;ENSG00000010671;ENSG00000114423;ENSG00000101336…	133	ENSG00000143507;ENSG00000197635;ENSG00000133710;ENSG00000168542;ENSG00000119699;ENSG00000171150;ENSG00000124882;ENSG00000170345	8	11221;1803;11005;1281;7043;9655;2069;2353	8
biological process	immune system process	GO:0002376	326	1.51	2.77e-15	CD200R1;ADAMDEC1;CTSF;CD40LG;DNAJC3;TAP1;S100A8;GATA3;SCGB1A1;IL18;CD5;IDO1;IL12A;SH2D1A;TGFBR3;MMP7;TINAGL1;IL2;BTK;HLA-DMB;TNFSF10;HCK;CD36;LCP1;RBP4;HHEX;ENPP1;NCKAP1L;NOD2;DDX58;HCST;SLC7A7;EGR1;OLR1;SELP;CD3G;C5;TNFSF8;CD27;DYNC1I1;ITGB5;COL3A1;CD1E;MARCH8;ITGA3;AQP4;CASP1;INHBA;EPHB3;SOCS5;MYB;CXCL13;PNP;RAB27A;KIF4A;PSMB10;SPTA1;CR1;IL18BP;C1S;COL1A2;IFIH1;PIK3CG;IRF1;KLHL6;XCL1;LCP2;HMOX1…	131450;27299;8722;959;5611;6890;6279;2625;7356;3606;921;3620;3592;4068;7049;4316;64129;3558;695;3109;8743;3055;948;3936;5950;3087;5167;3071;64127;23586;10870;9056;1958;4973;6403;917;727;944;939;1780;3693;1281;913;220972;3675;361;834;3624;2049;9655;4602;10563;4860;5873;24137;5699;6708;1378;10068;716;1278;64135;5294;3659;89857;6375;3937;3162;115362;2322;5341;10225;7098;3902;56915;1997;219790;253260…	ENSG00000163606;ENSG00000134028;ENSG00000174080;ENSG00000102245;ENSG00000102580;ENSG00000168394;ENSG00000143546;ENSG00000107485;ENSG00000149021;ENSG00000150782;ENSG00000110448;ENSG00000131203;ENSG00000168811;ENSG00000183918;ENSG00000069702;ENSG00000137673;ENSG00000142910;ENSG00000109471;ENSG00000010671;ENSG00000242574;ENSG00000121858;ENSG00000101336;ENSG00000135218;ENSG00000136167;ENSG00000138207…	ENSG00000163606;ENSG00000134028;ENSG00000174080;ENSG00000102245;ENSG00000102580;ENSG00000168394;ENSG00000143546;ENSG00000107485;ENSG00000149021;ENSG00000150782;ENSG00000110448;ENSG00000131203;ENSG00000168811;ENSG00000183918;ENSG00000069702;ENSG00000137673;ENSG00000142910;ENSG00000109471;ENSG00000010671;ENSG00000242574;ENSG00000121858;ENSG00000101336;ENSG00000135218;ENSG00000136167;ENSG00000138207…	326	ENSG00000163606;ENSG00000134028;ENSG00000102245;ENSG00000102580;ENSG00000168394;ENSG00000143546;ENSG00000107485;ENSG00000149021;ENSG00000150782;ENSG00000110448;ENSG00000131203;ENSG00000168811;ENSG00000183918;ENSG00000137673;ENSG00000109471;ENSG00000010671;ENSG00000242574;ENSG00000121858;ENSG00000101336;ENSG00000135218;ENSG00000136167;ENSG00000152804;ENSG00000123338;ENSG00000167207;ENSG00000107201…	269	131450;27299;959;5611;6890;6279;2625;7356;3606;921;3620;3592;4068;4316;3558;695;3109;8743;3055;948;3936;3087;3071;64127;23586;10870;9056;4973;6403;917;727;944;939;220972;3675;361;834;4602;10563;4860;5873;24137;5699;6708;1378;10068;716;64135;5294;3659;89857;6375;3937;3162;115362;2322;5341;10225;7098;3902;56915;1997;219790;253260;6863;841;51297;64092;8993;5588;56253;5698;3627;22806;29927;5579;6772;…	269	ENSG00000163606;ENSG00000134028;ENSG00000174080;ENSG00000102245;ENSG00000102580;ENSG00000168394;ENSG00000143546;ENSG00000107485;ENSG00000149021;ENSG00000150782;ENSG00000110448;ENSG00000131203;ENSG00000168811;ENSG00000183918;ENSG00000069702;ENSG00000137673;ENSG00000142910;ENSG00000109471;ENSG00000010671;ENSG00000242574;ENSG00000121858;ENSG00000101336;ENSG00000135218;ENSG00000136167;ENSG00000138207…	326	ENSG00000174080;ENSG00000069702;ENSG00000142910;ENSG00000138207;ENSG00000197594;ENSG00000120738;ENSG00000158560;ENSG00000082781;ENSG00000168542;ENSG00000158488;ENSG00000122641;ENSG00000182580;ENSG00000171150;ENSG00000164692;ENSG00000100934;ENSG00000181634;ENSG00000134363;ENSG00000128606;ENSG00000180209;ENSG00000187240;ENSG00000110693;ENSG00000142507;ENSG00000150630;ENSG00000123999;ENSG00000170345…	57	8722;7049;64129;5950;5167;1958;1780;3693;1281;913;3624;2049;9655;1278;10484;9966;10468;10234;29895;79659;55553;5694;7424;3623;2353;7374;3685;133522;11004;8544;6935;11221;10587;6733;55176;6401;1803;6093;11005;10060;6788;7043;2069;11127;84293;3204;23543;7299;9464;51119;182;92;2888;9734;3764;57045;2669	57
biological process	regulation of immune system process	GO:0002682	181	1.77	5.36e-15	UNC93B1;CD200R1;CCL19;CD40LG;CD3E;PPARGC1B;MS4A2;TAP1;GATA3;SCGB1A1;IL18;MAPK14;CD5;IDO1;HLA-DPA1;IL12A;SH2D1A;DLL1;CD247;C1RL;DUSP10;TLR4;C3;ITGB7;ITGAL;USP18;SELE;IL2;BTK;CBLB;VEGFA;HCK;CD36;CDK1;CXADR;ITGB2;RBP4;LEF1;NCKAP1L;IL8;NOD2;PTK2B;DPP4;VCAM1;CLU;HLA-DRA;DDX58;HCST;AMICA1;SELP;C6;A2M;CD3G;C5;CD27;SPINK5;COL3A1;CA2;PYCARD;TGFB3;TRAT1;CD3D;WNT3A;INHBA;C9;MYB;SOCS5;CTLA4;CXCL13;PNP;CD79B;…	81622;131450;6363;959;916;133522;2206;6890;2625;7356;3606;1432;921;3620;3113;3592;4068;28514;919;51279;11221;7099;718;3695;3683;11274;6401;3558;695;868;7422;3055;948;983;1525;3689;5950;51176;3071;3576;64127;2185;1803;7412;1191;3122;23586;10870;120425;6403;729;2;917;727;939;11005;1281;760;29108;7043;50852;915;89780;3624;735;4602;9655;1493;10563;4860;974;4005;952;2214;6708;1378;4792;961;2069;716;84…	ENSG00000110057;ENSG00000163606;ENSG00000172724;ENSG00000102245;ENSG00000198851;ENSG00000155846;ENSG00000149534;ENSG00000168394;ENSG00000107485;ENSG00000149021;ENSG00000150782;ENSG00000112062;ENSG00000110448;ENSG00000131203;ENSG00000231389;ENSG00000168811;ENSG00000183918;ENSG00000198719;ENSG00000198821;ENSG00000139178;ENSG00000143507;ENSG00000136869;ENSG00000125730;ENSG00000139626;ENSG00000005844…	ENSG00000110057;ENSG00000163606;ENSG00000172724;ENSG00000102245;ENSG00000198851;ENSG00000155846;ENSG00000149534;ENSG00000168394;ENSG00000107485;ENSG00000149021;ENSG00000150782;ENSG00000112062;ENSG00000110448;ENSG00000131203;ENSG00000231389;ENSG00000168811;ENSG00000183918;ENSG00000198719;ENSG00000198821;ENSG00000139178;ENSG00000143507;ENSG00000136869;ENSG00000125730;ENSG00000139626;ENSG00000005844…	181	ENSG00000110057;ENSG00000163606;ENSG00000172724;ENSG00000102245;ENSG00000198851;ENSG00000149534;ENSG00000168394;ENSG00000107485;ENSG00000149021;ENSG00000150782;ENSG00000112062;ENSG00000110448;ENSG00000131203;ENSG00000231389;ENSG00000168811;ENSG00000183918;ENSG00000198719;ENSG00000198821;ENSG00000139178;ENSG00000136869;ENSG00000125730;ENSG00000139626;ENSG00000005844;ENSG00000184979;ENSG00000109471…	161	81622;131450;6363;959;916;2206;6890;2625;7356;3606;1432;921;3620;3113;3592;4068;28514;919;51279;7099;718;3695;3683;11274;3558;695;868;7422;3055;948;983;1525;3689;51176;3071;3576;64127;2185;7412;1191;3122;23586;10870;120425;6403;729;2;917;727;939;760;29108;50852;915;89780;735;4602;1493;10563;4860;974;4005;952;2214;6708;1378;4792;961;716;64135;4843;3659;89857;1540;3600;6375;336;6813;81793;3937;4067…	161	ENSG00000110057;ENSG00000163606;ENSG00000172724;ENSG00000102245;ENSG00000198851;ENSG00000155846;ENSG00000149534;ENSG00000168394;ENSG00000107485;ENSG00000149021;ENSG00000150782;ENSG00000112062;ENSG00000110448;ENSG00000131203;ENSG00000231389;ENSG00000168811;ENSG00000183918;ENSG00000198719;ENSG00000198821;ENSG00000139178;ENSG00000143507;ENSG00000136869;ENSG00000125730;ENSG00000139626;ENSG00000005844…	181	ENSG00000155846;ENSG00000143507;ENSG00000007908;ENSG00000138207;ENSG00000197635;ENSG00000133710;ENSG00000168542;ENSG00000119699;ENSG00000122641;ENSG00000171150;ENSG00000124882;ENSG00000122378;ENSG00000122592;ENSG00000100320;ENSG00000101384;ENSG00000121989;ENSG00000128606;ENSG00000150630;ENSG00000123999;ENSG00000170345	20	133522;11221;6401;5950;1803;11005;1281;7043;3624;9655;2069;84293;3204;23543;182;92;10234;7424;3623;2353	20
biological process	multicellular organismal process	GO:0032501	799	1.21	1.03e-11	SLMAP;ADAM19;MREG;RYR1;CD40LG;DES;RECK;NPHS2;AQP1;IL18;FGG;HAS2;CCNE1;WEE1;FBXO32;TGFBR3;MMP7;ZFHX3;CLDN4;PSD;CPE;BOC;MEIS2;SMAD9;MDGA1;GJB2;CAP2;PIWIL4;BTK;PTPLA;HLA-DMB;KCNA5;DCT;CD36;MYOM1;TRIML1;LCP1;ASB4;MYH11;RBP4;APOH;ENPP1;UCMA;HEMGN;NOD2;TPM1;TNNC1;SCN5A;STOX2;CXCR7;SELP;GLRB;TJP1;GPSM2;ITGB5;SLC1A1;MIP;ELF3;SYCP2;CSRP3;SDR16C5;RAC2;PDE6C;OBSL1;CACNB2;SFTPB;LAMB2;CADPS2;CASP1;INHBA;PAQR7…	7871;8728;55686;6261;959;1674;8434;7827;358;3606;2266;3037;898;7465;114907;7049;4316;463;1364;5662;1363;91653;4212;4093;266727;2706;10486;143689;695;9200;3109;3741;1638;948;8736;339976;3936;51666;4629;5950;350;5167;221044;55363;64127;7168;7134;6331;56977;57007;6403;2743;7082;29899;3693;6505;4284;1999;10388;8048;195814;5880;5146;23363;783;6439;3913;93664;834;3624;164091;4602;4860;1429;80705;3158;1…	ENSG00000163681;ENSG00000135074;ENSG00000118242;ENSG00000196218;ENSG00000102245;ENSG00000175084;ENSG00000122707;ENSG00000116218;ENSG00000240583;ENSG00000150782;ENSG00000171557;ENSG00000170961;ENSG00000105173;ENSG00000166483;ENSG00000156804;ENSG00000069702;ENSG00000137673;ENSG00000140836;ENSG00000189143;ENSG00000059915;ENSG00000109472;ENSG00000144857;ENSG00000134138;ENSG00000120693;ENSG00000112139…	ENSG00000163681;ENSG00000135074;ENSG00000118242;ENSG00000196218;ENSG00000102245;ENSG00000175084;ENSG00000122707;ENSG00000116218;ENSG00000240583;ENSG00000150782;ENSG00000171557;ENSG00000170961;ENSG00000105173;ENSG00000166483;ENSG00000156804;ENSG00000069702;ENSG00000137673;ENSG00000140836;ENSG00000189143;ENSG00000059915;ENSG00000109472;ENSG00000144857;ENSG00000134138;ENSG00000120693;ENSG00000112139…	799	ENSG00000118242;ENSG00000102245;ENSG00000150782;ENSG00000171557;ENSG00000105173;ENSG00000137673;ENSG00000189143;ENSG00000165474;ENSG00000134627;ENSG00000010671;ENSG00000242574;ENSG00000135218;ENSG00000136167;ENSG00000005981;ENSG00000136929;ENSG00000167207;ENSG00000174175;ENSG00000106688;ENSG00000163435;ENSG00000196074;ENSG00000170786;ENSG00000128340;ENSG00000095464;ENSG00000168878;ENSG00000081803…	430	55686;959;3606;2266;898;4316;1364;2706;143689;695;3109;948;3936;51666;55363;64127;6403;6505;1999;10388;195814;5880;5146;6439;93664;834;164091;4602;4860;80705;3158;10203;2201;6098;5873;25928;84649;716;7222;1381;5294;5741;2054;8796;6375;1555;3937;3162;3925;2705;7098;219790;253260;6863;10753;3872;8085;8993;84229;56253;3627;26298;5729;29927;3176;5172;4036;567;2113;1580;914;8879;2146;2937;79132;5787;2…	430	ENSG00000163681;ENSG00000135074;ENSG00000118242;ENSG00000196218;ENSG00000102245;ENSG00000175084;ENSG00000122707;ENSG00000116218;ENSG00000240583;ENSG00000150782;ENSG00000171557;ENSG00000170961;ENSG00000105173;ENSG00000166483;ENSG00000156804;ENSG00000069702;ENSG00000137673;ENSG00000140836;ENSG00000189143;ENSG00000059915;ENSG00000109472;ENSG00000144857;ENSG00000134138;ENSG00000120693;ENSG00000112139…	799	ENSG00000163681;ENSG00000135074;ENSG00000196218;ENSG00000175084;ENSG00000122707;ENSG00000116218;ENSG00000240583;ENSG00000170961;ENSG00000166483;ENSG00000156804;ENSG00000069702;ENSG00000140836;ENSG00000059915;ENSG00000109472;ENSG00000144857;ENSG00000134138;ENSG00000120693;ENSG00000112139;ENSG00000112186;ENSG00000165996;ENSG00000130037;ENSG00000080166;ENSG00000101605;ENSG00000184108;ENSG00000133392…	369	7871;8728;6261;1674;8434;7827;358;3037;7465;114907;7049;463;5662;1363;91653;4212;4093;266727;10486;9200;3741;1638;8736;339976;4629;5950;350;5167;221044;7168;7134;6331;56977;57007;2743;7082;29899;3693;4284;8048;23363;783;3913;3624;1429;6262;3931;51301;5350;1278;5309;1000;2045;9627;1466;6910;10058;4921;6444;9362;5954;65266;8611;51339;5149;80114;4620;4015;2191;54961;91807;1292;27133;6594;7481;85461;…	369
biological process	single-multicellular organism process	GO:0044707	796	1.21	1.07e-11	SLMAP;ADAM19;MREG;RYR1;CD40LG;DES;RECK;NPHS2;AQP1;IL18;FGG;HAS2;CCNE1;WEE1;FBXO32;TGFBR3;MMP7;ZFHX3;PSD;CPE;BOC;MEIS2;SMAD9;MDGA1;GJB2;CAP2;PIWIL4;BTK;PTPLA;HLA-DMB;KCNA5;DCT;CD36;MYOM1;TRIML1;LCP1;ASB4;MYH11;RBP4;APOH;ENPP1;UCMA;HEMGN;NOD2;TPM1;TNNC1;SCN5A;STOX2;CXCR7;SELP;GLRB;TJP1;GPSM2;ITGB5;SLC1A1;MIP;ELF3;SYCP2;CSRP3;SDR16C5;RAC2;PDE6C;OBSL1;CACNB2;SFTPB;LAMB2;CADPS2;CASP1;INHBA;PAQR7;MYB;P…	7871;8728;55686;6261;959;1674;8434;7827;358;3606;2266;3037;898;7465;114907;7049;4316;463;5662;1363;91653;4212;4093;266727;2706;10486;143689;695;9200;3109;3741;1638;948;8736;339976;3936;51666;4629;5950;350;5167;221044;55363;64127;7168;7134;6331;56977;57007;6403;2743;7082;29899;3693;6505;4284;1999;10388;8048;195814;5880;5146;23363;783;6439;3913;93664;834;3624;164091;4602;4860;1429;80705;3158;10203;…	ENSG00000163681;ENSG00000135074;ENSG00000118242;ENSG00000196218;ENSG00000102245;ENSG00000175084;ENSG00000122707;ENSG00000116218;ENSG00000240583;ENSG00000150782;ENSG00000171557;ENSG00000170961;ENSG00000105173;ENSG00000166483;ENSG00000156804;ENSG00000069702;ENSG00000137673;ENSG00000140836;ENSG00000059915;ENSG00000109472;ENSG00000144857;ENSG00000134138;ENSG00000120693;ENSG00000112139;ENSG00000165474…	ENSG00000163681;ENSG00000135074;ENSG00000118242;ENSG00000196218;ENSG00000102245;ENSG00000175084;ENSG00000122707;ENSG00000116218;ENSG00000240583;ENSG00000150782;ENSG00000171557;ENSG00000170961;ENSG00000105173;ENSG00000166483;ENSG00000156804;ENSG00000069702;ENSG00000137673;ENSG00000140836;ENSG00000059915;ENSG00000109472;ENSG00000144857;ENSG00000134138;ENSG00000120693;ENSG00000112139;ENSG00000165474…	796	ENSG00000118242;ENSG00000102245;ENSG00000150782;ENSG00000171557;ENSG00000105173;ENSG00000137673;ENSG00000165474;ENSG00000134627;ENSG00000010671;ENSG00000242574;ENSG00000135218;ENSG00000136167;ENSG00000005981;ENSG00000136929;ENSG00000167207;ENSG00000174175;ENSG00000106688;ENSG00000163435;ENSG00000196074;ENSG00000170786;ENSG00000128340;ENSG00000095464;ENSG00000168878;ENSG00000081803;ENSG00000137752…	429	55686;959;3606;2266;898;4316;2706;143689;695;3109;948;3936;51666;55363;64127;6403;6505;1999;10388;195814;5880;5146;6439;93664;834;164091;4602;4860;80705;3158;10203;2201;6098;5873;25928;84649;716;7222;1381;5294;5741;2054;8796;6375;1555;3937;3162;3925;2705;7098;219790;253260;6863;10753;3872;8085;8993;84229;56253;3627;26298;5729;29927;3176;5172;4036;567;2113;1580;914;8879;2146;2937;79132;5787;2719;6…	429	ENSG00000163681;ENSG00000135074;ENSG00000118242;ENSG00000196218;ENSG00000102245;ENSG00000175084;ENSG00000122707;ENSG00000116218;ENSG00000240583;ENSG00000150782;ENSG00000171557;ENSG00000170961;ENSG00000105173;ENSG00000166483;ENSG00000156804;ENSG00000069702;ENSG00000137673;ENSG00000140836;ENSG00000059915;ENSG00000109472;ENSG00000144857;ENSG00000134138;ENSG00000120693;ENSG00000112139;ENSG00000165474…	796	ENSG00000163681;ENSG00000135074;ENSG00000196218;ENSG00000175084;ENSG00000122707;ENSG00000116218;ENSG00000240583;ENSG00000170961;ENSG00000166483;ENSG00000156804;ENSG00000069702;ENSG00000140836;ENSG00000059915;ENSG00000109472;ENSG00000144857;ENSG00000134138;ENSG00000120693;ENSG00000112139;ENSG00000112186;ENSG00000165996;ENSG00000130037;ENSG00000080166;ENSG00000101605;ENSG00000184108;ENSG00000133392…	367	7871;8728;6261;1674;8434;7827;358;3037;7465;114907;7049;463;5662;1363;91653;4212;4093;266727;10486;9200;3741;1638;8736;339976;4629;5950;350;5167;221044;7168;7134;6331;56977;57007;2743;7082;29899;3693;4284;8048;23363;783;3913;3624;1429;6262;3931;51301;5350;1278;5309;1000;2045;9627;1466;6910;10058;4921;6444;9362;5954;65266;8611;51339;5149;80114;4620;4015;2191;54961;91807;1292;27133;6594;7481;85461;…	367
biological process	organ development	GO:0048513	418	1.34	6.11e-11	LGR5;ADAM19;MREG;HSPG2;RYR1;CTSF;CD40LG;TAP1;NPHS2;AQP1;GATA3;IL18;CCNB1;SEPT4;HAS2;CCNE1;TGFBR3;CTGF;ZFHX3;TACSTD2;CPE;BOC;SGCE;MEIS2;SMAD9;MDGA1;GJB2;IL2;BTK;MKI67;HLA-DMB;DCT;CD36;SLC8A1;LCP1;MYH11;RBP4;APOH;HHEX;ENPP1;NCKAP1L;BAMBI;TPM1;TNNC1;SCN5A;CHRNA9;STOX2;EGR1;ANKH;SULF1;GPSM2;TNFSF8;CD27;DYNC1I1;ITGB5;COL3A1;MIP;BMP2K;KIAA1161;ELF3;SYCP2;CSRP3;PDE6C;OBSL1;CYR61;CACNB2;BDH1;SFTPB;PRKG1;…	8549;8728;55686;3339;6261;8722;959;6890;7827;358;2625;3606;891;5414;3037;898;7049;1490;463;4070;1363;91653;8910;4212;4093;266727;2706;3558;695;4288;3109;1638;948;6546;3936;4629;5950;350;3087;5167;3071;25805;7168;7134;6331;55584;56977;1958;56172;23213;29899;944;939;1780;3693;1281;4284;55589;57462;1999;10388;8048;5146;23363;3491;783;622;6439;5592;3913;23554;834;3624;2049;9655;4602;10563;1558;4860;1…	ENSG00000139292;ENSG00000135074;ENSG00000118242;ENSG00000142798;ENSG00000196218;ENSG00000174080;ENSG00000102245;ENSG00000168394;ENSG00000116218;ENSG00000240583;ENSG00000107485;ENSG00000150782;ENSG00000134057;ENSG00000108387;ENSG00000170961;ENSG00000105173;ENSG00000069702;ENSG00000118523;ENSG00000140836;ENSG00000184292;ENSG00000109472;ENSG00000144857;ENSG00000127990;ENSG00000134138;ENSG00000120693…	ENSG00000139292;ENSG00000135074;ENSG00000118242;ENSG00000142798;ENSG00000196218;ENSG00000174080;ENSG00000102245;ENSG00000168394;ENSG00000116218;ENSG00000240583;ENSG00000107485;ENSG00000150782;ENSG00000134057;ENSG00000108387;ENSG00000170961;ENSG00000105173;ENSG00000069702;ENSG00000118523;ENSG00000140836;ENSG00000184292;ENSG00000109472;ENSG00000144857;ENSG00000127990;ENSG00000134138;ENSG00000120693…	418	ENSG00000139292;ENSG00000118242;ENSG00000102245;ENSG00000168394;ENSG00000107485;ENSG00000150782;ENSG00000134057;ENSG00000108387;ENSG00000105173;ENSG00000184292;ENSG00000165474;ENSG00000109471;ENSG00000010671;ENSG00000148773;ENSG00000242574;ENSG00000135218;ENSG00000136167;ENSG00000152804;ENSG00000123338;ENSG00000174343;ENSG00000106952;ENSG00000139193;ENSG00000138756;ENSG00000163435;ENSG00000196074…	216	8549;55686;959;6890;2625;3606;891;5414;898;4070;2706;3558;695;4288;3109;948;3936;3087;3071;55584;944;939;55589;1999;10388;5146;6439;23554;834;4602;10563;1558;4860;1286;3158;10203;2201;154;24137;5699;6708;25928;84649;5741;3659;2054;8796;1555;2322;5341;7098;219790;841;3872;11081;8993;5698;27230;3627;22806;29927;3176;6772;1636;4036;567;2113;6714;1947;1580;914;3105;10682;2146;8879;1512;220042;7050;71…	216	ENSG00000139292;ENSG00000135074;ENSG00000118242;ENSG00000142798;ENSG00000196218;ENSG00000174080;ENSG00000102245;ENSG00000168394;ENSG00000116218;ENSG00000240583;ENSG00000107485;ENSG00000150782;ENSG00000134057;ENSG00000108387;ENSG00000170961;ENSG00000105173;ENSG00000069702;ENSG00000118523;ENSG00000140836;ENSG00000184292;ENSG00000109472;ENSG00000144857;ENSG00000127990;ENSG00000134138;ENSG00000120693…	418	ENSG00000135074;ENSG00000142798;ENSG00000196218;ENSG00000174080;ENSG00000116218;ENSG00000240583;ENSG00000170961;ENSG00000069702;ENSG00000118523;ENSG00000140836;ENSG00000109472;ENSG00000144857;ENSG00000127990;ENSG00000134138;ENSG00000120693;ENSG00000112139;ENSG00000080166;ENSG00000183023;ENSG00000133392;ENSG00000138207;ENSG00000091583;ENSG00000197594;ENSG00000095739;ENSG00000140416;ENSG00000114854…	202	8728;3339;6261;8722;7827;358;3037;7049;1490;463;1363;91653;8910;4212;4093;266727;1638;6546;4629;5950;350;5167;25805;7168;7134;6331;56977;1958;56172;23213;29899;1780;3693;1281;4284;57462;8048;23363;3491;783;622;5592;3913;3624;2049;9655;6262;4781;51301;5350;1462;4929;1427;1278;5309;2045;6910;10058;9500;5037;4921;6444;55212;2317;5954;51339;1289;122042;8557;4015;10484;91807;6594;7481;26108;9365;27295…	202
biological process	single-organism process	GO:0044699	1035	1.14	1.37e-10	P2RY4;ADAM19;RYR1;RECK;FGG;CCNE1;MMP7;ZFHX3;EDEM1;RAB33A;MOB1A;CPE;RHOBTB3;RAD1;MDGA1;BTK;HLA-DMB;KDELR3;KCNA5;TNFSF10;DCT;LCP1;APOH;ENPP1;UCMA;FBP1;HEMGN;NOD2;TPM1;SCN5A;KLB;CXCR7;SELP;FCRL2;CD3G;SP110;TJP1;GPSM2;APH1B;CSRP3;SDR16C5;RAC2;PDE6C;CADPS2;CASP1;PAQR7;MYB;HPS3;EIF4E2;TSGA10;HMGCS2;RAB27A;SOSTDC1;FGFBP1;DGAT2;ATP6V0D2;COL1A2;PITX3;CDH2;EPHA7;CRABP1;ARHGAP10;STX2;ABCB6;SCEL;XCL1;DDR2;SG…	5030;8728;6261;8434;2266;898;4316;463;9695;9363;55233;1363;22836;5810;266727;695;3109;11015;3741;8743;1638;3936;350;5167;221044;2203;55363;64127;7168;6331;152831;57007;6403;79368;917;3431;7082;29899;83464;8048;195814;5880;5146;93664;834;164091;4602;84343;9470;80705;3158;5873;25928;9982;84649;245972;1278;5309;1000;2045;1381;79658;2054;10058;8796;6375;4921;6444;1555;3925;5954;8611;2705;7098;253260;…	ENSG00000186912;ENSG00000135074;ENSG00000196218;ENSG00000122707;ENSG00000171557;ENSG00000105173;ENSG00000137673;ENSG00000140836;ENSG00000134109;ENSG00000134594;ENSG00000114978;ENSG00000109472;ENSG00000164292;ENSG00000113456;ENSG00000112139;ENSG00000010671;ENSG00000242574;ENSG00000100196;ENSG00000130037;ENSG00000121858;ENSG00000080166;ENSG00000136167;ENSG00000091583;ENSG00000197594;ENSG00000165623…	ENSG00000186912;ENSG00000135074;ENSG00000196218;ENSG00000122707;ENSG00000171557;ENSG00000105173;ENSG00000137673;ENSG00000140836;ENSG00000134109;ENSG00000134594;ENSG00000114978;ENSG00000109472;ENSG00000164292;ENSG00000113456;ENSG00000112139;ENSG00000010671;ENSG00000242574;ENSG00000100196;ENSG00000130037;ENSG00000121858;ENSG00000080166;ENSG00000136167;ENSG00000091583;ENSG00000197594;ENSG00000165623…	1035	ENSG00000186912;ENSG00000171557;ENSG00000105173;ENSG00000137673;ENSG00000134109;ENSG00000114978;ENSG00000113456;ENSG00000010671;ENSG00000242574;ENSG00000121858;ENSG00000136167;ENSG00000165140;ENSG00000136929;ENSG00000167207;ENSG00000134962;ENSG00000174175;ENSG00000132704;ENSG00000160654;ENSG00000135899;ENSG00000138613;ENSG00000170786;ENSG00000128340;ENSG00000095464;ENSG00000081803;ENSG00000137752…	583	5030;2266;898;4316;9695;55233;5810;695;3109;8743;3936;2203;55363;64127;152831;6403;79368;917;3431;83464;195814;5880;5146;93664;834;164091;4602;84343;9470;80705;3158;5873;25928;84649;245972;1381;2054;8796;6375;1555;3925;2705;7098;253260;10753;8085;8993;84229;50616;56253;3627;3176;5172;4036;1580;8879;2146;2937;79132;5787;2719;84106;5359;10475;3676;168002;1576;8842;84061;3552;3113;23225;28514;919;64…	583	ENSG00000186912;ENSG00000135074;ENSG00000196218;ENSG00000122707;ENSG00000171557;ENSG00000105173;ENSG00000137673;ENSG00000140836;ENSG00000134109;ENSG00000134594;ENSG00000114978;ENSG00000109472;ENSG00000164292;ENSG00000113456;ENSG00000112139;ENSG00000010671;ENSG00000242574;ENSG00000100196;ENSG00000130037;ENSG00000121858;ENSG00000080166;ENSG00000136167;ENSG00000091583;ENSG00000197594;ENSG00000165623…	1035	ENSG00000135074;ENSG00000196218;ENSG00000122707;ENSG00000140836;ENSG00000134594;ENSG00000109472;ENSG00000164292;ENSG00000112139;ENSG00000100196;ENSG00000130037;ENSG00000080166;ENSG00000091583;ENSG00000197594;ENSG00000165623;ENSG00000140416;ENSG00000183873;ENSG00000134962;ENSG00000144476;ENSG00000104067;ENSG00000121957;ENSG00000129170;ENSG00000137440;ENSG00000164692;ENSG00000107859;ENSG00000170558…	453	8728;6261;8434;463;9363;1363;22836;266727;11015;3741;1638;350;5167;221044;7168;6331;152831;57007;7082;29899;8048;9982;1278;5309;1000;2045;79658;10058;4921;6444;5954;8611;91807;1292;6594;7481;85461;27295;348980;27314;8100;3696;2690;5694;50837;7424;23189;8471;54360;27122;8013;3685;130497;59272;29995;57447;5136;633;7052;5347;7068;6401;3757;1959;11167;11061;4504;84913;7059;1601;4040;56896;4625;26289;…	453
biological process	positive regulation of immune system process	GO:0002684	125	1.8	1.73e-10	UNC93B1;KLHL6;CYLD;CCL19;IL15;CD40LG;CD3E;XCL1;MS4A2;TAP1;GATA3;IL18;STXBP2;TLR10;LCP2;MAPK14;HMOX1;LYN;CD5;IDO1;HLA-DPA1;IL12A;SH2D1A;TLR3;LAG3;CD247;PLCG2;C1RL;ELF1;RICTOR;CORO1A;TAC1;NFKB2;CASP8;C2;TLR4;IL23R;C3;ITGAL;BIRC3;SELE;BTK;IL2;CBLB;PRKCQ;CD14;PTPN22;CRTAM;VEGFA;HCK;CD36;CFP;CDK1;CXCL10;PRKCB;NCKAP1L;HLA-DQB2;IL8;NOD2;PTK2B;DPP4;VCAM1;IRF7;CLU;HLA-DRA;DDX58;SELP;C6;CD3G;A2M;TNFSF13B;C…	81622;89857;1540;6363;3600;959;916;6375;2206;6890;2625;3606;6813;81793;3937;1432;3162;4067;921;3620;3113;3592;4068;7098;3902;919;5336;51279;1997;253260;11151;6863;4791;841;717;7099;149233;718;3683;330;6401;695;3558;868;5588;929;26191;56253;7422;3055;948;5199;983;3627;5579;3071;3120;3576;64127;2185;1803;7412;3665;1191;3122;23586;6403;729;917;2;10673;727;567;939;29851;6714;1947;914;9404;5583;640;36…	ENSG00000110057;ENSG00000172578;ENSG00000083799;ENSG00000172724;ENSG00000164136;ENSG00000102245;ENSG00000198851;ENSG00000143184;ENSG00000149534;ENSG00000168394;ENSG00000107485;ENSG00000150782;ENSG00000076944;ENSG00000174123;ENSG00000043462;ENSG00000112062;ENSG00000100292;ENSG00000254087;ENSG00000110448;ENSG00000131203;ENSG00000231389;ENSG00000168811;ENSG00000183918;ENSG00000164342;ENSG00000089692…	ENSG00000110057;ENSG00000172578;ENSG00000083799;ENSG00000172724;ENSG00000164136;ENSG00000102245;ENSG00000198851;ENSG00000143184;ENSG00000149534;ENSG00000168394;ENSG00000107485;ENSG00000150782;ENSG00000076944;ENSG00000174123;ENSG00000043462;ENSG00000112062;ENSG00000100292;ENSG00000254087;ENSG00000110448;ENSG00000131203;ENSG00000231389;ENSG00000168811;ENSG00000183918;ENSG00000164342;ENSG00000089692…	125	ENSG00000110057;ENSG00000172578;ENSG00000083799;ENSG00000172724;ENSG00000164136;ENSG00000102245;ENSG00000198851;ENSG00000143184;ENSG00000149534;ENSG00000168394;ENSG00000107485;ENSG00000150782;ENSG00000076944;ENSG00000174123;ENSG00000043462;ENSG00000112062;ENSG00000100292;ENSG00000254087;ENSG00000110448;ENSG00000131203;ENSG00000231389;ENSG00000168811;ENSG00000183918;ENSG00000164342;ENSG00000089692…	119	81622;89857;1540;6363;3600;959;916;6375;2206;6890;2625;3606;6813;81793;3937;1432;3162;4067;921;3620;3113;3592;4068;7098;3902;919;5336;51279;1997;253260;11151;6863;4791;841;717;7099;149233;718;3683;330;695;3558;868;5588;929;26191;56253;7422;3055;948;5199;983;3627;5579;3071;3120;3576;64127;2185;7412;3665;1191;3122;23586;6403;729;917;2;10673;727;567;939;29851;6714;1947;914;9404;5583;640;3662;79132;2…	119	ENSG00000110057;ENSG00000172578;ENSG00000083799;ENSG00000172724;ENSG00000164136;ENSG00000102245;ENSG00000198851;ENSG00000143184;ENSG00000149534;ENSG00000168394;ENSG00000107485;ENSG00000150782;ENSG00000076944;ENSG00000174123;ENSG00000043462;ENSG00000112062;ENSG00000100292;ENSG00000254087;ENSG00000110448;ENSG00000131203;ENSG00000231389;ENSG00000168811;ENSG00000183918;ENSG00000164342;ENSG00000089692…	125	ENSG00000007908;ENSG00000197635;ENSG00000171150;ENSG00000150630;ENSG00000170345;ENSG00000124882	6	6401;1803;9655;7424;2353;2069	6
biological process	defense response	GO:0006952	191	1.58	1.81e-10	UNC93B1;PTAFR;LCN2;CCL19;CD40LG;DNAJC3;MS4A2;TNFAIP8L2;TAP1;SLAMF7;S100A8;GATA3;SCGB1A1;IL18;IL1A;MAPK14;IDO1;HLA-DPA1;IL12A;SH2D1A;PSMB8;MMP7;CD247;AOAH;C1RL;DUSP10;TGM2;TLR4;SRPK2;C3;DEFA4;ITGAL;USP18;SELE;IL2;BTK;HCK;CD36;LIPA;MEFV;CDK1;CXADR;ITGB2;KYNU;IL8;NOD2;VCAM1;CLU;HLA-DRA;DDX58;ALOX5AP;EGR1;LGALS3;OLR1;SELP;C6;A2M;C5;TNFSF8;IL18R1;ELF3;ABCC9;APOBEC1;UBA7;PYCARD;NCF1;AQP4;IRF9;TPST1;TRA…	81622;5724;3934;6363;959;5611;2206;79626;6890;57823;6279;2625;7356;3606;3552;1432;3620;3113;3592;4068;5696;4316;919;313;51279;11221;7052;7099;6733;718;1669;3683;11274;6401;3558;695;3055;948;3988;4210;983;1525;3689;8942;3576;64127;7412;1191;3122;23586;241;1958;3958;4973;6403;729;2;727;944;8809;1999;10060;339;7318;29108;653361;361;10379;8460;50852;5551;834;3624;735;7130;10563;130120;10203;154;29760…	ENSG00000110057;ENSG00000169403;ENSG00000148346;ENSG00000172724;ENSG00000102245;ENSG00000102580;ENSG00000149534;ENSG00000163154;ENSG00000168394;ENSG00000026751;ENSG00000143546;ENSG00000107485;ENSG00000149021;ENSG00000150782;ENSG00000115008;ENSG00000112062;ENSG00000131203;ENSG00000231389;ENSG00000168811;ENSG00000183918;ENSG00000204264;ENSG00000137673;ENSG00000198821;ENSG00000136250;ENSG00000139178…	ENSG00000110057;ENSG00000169403;ENSG00000148346;ENSG00000172724;ENSG00000102245;ENSG00000102580;ENSG00000149534;ENSG00000163154;ENSG00000168394;ENSG00000026751;ENSG00000143546;ENSG00000107485;ENSG00000149021;ENSG00000150782;ENSG00000115008;ENSG00000112062;ENSG00000131203;ENSG00000231389;ENSG00000168811;ENSG00000183918;ENSG00000204264;ENSG00000137673;ENSG00000198821;ENSG00000136250;ENSG00000139178…	191	ENSG00000110057;ENSG00000169403;ENSG00000148346;ENSG00000172724;ENSG00000102245;ENSG00000102580;ENSG00000149534;ENSG00000163154;ENSG00000168394;ENSG00000026751;ENSG00000143546;ENSG00000107485;ENSG00000149021;ENSG00000150782;ENSG00000115008;ENSG00000112062;ENSG00000131203;ENSG00000231389;ENSG00000168811;ENSG00000183918;ENSG00000204264;ENSG00000137673;ENSG00000198821;ENSG00000136250;ENSG00000139178…	171	81622;5724;3934;6363;959;5611;2206;79626;6890;57823;6279;2625;7356;3606;3552;1432;3620;3113;3592;4068;5696;4316;919;313;51279;7099;718;1669;3683;11274;3558;695;3055;948;4210;983;1525;3689;8942;3576;64127;7412;1191;3122;23586;241;3958;4973;6403;729;2;727;944;8809;1999;339;7318;29108;653361;361;10379;50852;5551;834;735;7130;10563;130120;10203;154;29760;3663;5873;5320;1378;4792;961;50489;716;64135;4…	171	ENSG00000110057;ENSG00000169403;ENSG00000148346;ENSG00000172724;ENSG00000102245;ENSG00000102580;ENSG00000149534;ENSG00000163154;ENSG00000168394;ENSG00000026751;ENSG00000143546;ENSG00000107485;ENSG00000149021;ENSG00000150782;ENSG00000115008;ENSG00000112062;ENSG00000131203;ENSG00000231389;ENSG00000168811;ENSG00000183918;ENSG00000204264;ENSG00000137673;ENSG00000198821;ENSG00000136250;ENSG00000139178…	191	ENSG00000143507;ENSG00000198959;ENSG00000135250;ENSG00000007908;ENSG00000107798;ENSG00000120738;ENSG00000069431;ENSG00000169902;ENSG00000122641;ENSG00000124882;ENSG00000075651;ENSG00000140795;ENSG00000172016;ENSG00000133116;ENSG00000073756;ENSG00000048052;ENSG00000121361;ENSG00000170345;ENSG00000144891;ENSG00000130234	20	11221;7052;6733;6401;3988;1958;10060;8460;3624;2069;5337;91807;5068;9365;5743;9734;3764;2353;185;59272	20
biological process	immune effector process	GO:0002252	100	1.93	2.67e-10	UNC93B1;CCL19;IL15;CD40LG;DNAJC3;XCL1;MS4A2;TAP1;APOA2;SLAMF7;GATA3;STXBP2;HMOX1;LYN;DOCK2;IL12A;SH2D1A;TLR3;LAG3;CD247;PLCG2;EXOSC5;C1RL;DUSP10;ITGAX;C2;TLR4;IL23R;C3;ITGAL;BIRC3;BTK;PGLYRP1;IL2;PTGER4;CRTAM;HCK;CD36;CFP;LCP1;CXADR;RBP4;EXO1;CXCL10;LEF1;GBP1;STAT1;NOD2;PTK2B;DPP4;IRF7;CLU;DDX58;CX3CR1;C6;A2M;C5;B2M;IFNW1;CD27;HLA-A;IRF4;ABCC9;APOBEC1;DHX58;CTSC;PYCARD;NCF1;SAMHD1;TGFB3;IRF9;VSIG…	81622;6363;3600;959;5611;6375;2206;6890;336;57823;2625;6813;3162;4067;1794;3592;4068;7098;3902;919;5336;56915;51279;11221;3687;717;7099;149233;718;3683;330;695;8993;3558;5734;56253;3055;948;5199;3936;1525;5950;9156;3627;51176;2633;6772;64127;2185;1803;3665;1191;23586;1524;729;2;727;567;3467;939;3105;3662;10060;339;79132;1075;29108;653361;25939;7043;10379;11326;84106;130340;5551;1512;4602;9655;735…	ENSG00000110057;ENSG00000172724;ENSG00000164136;ENSG00000102245;ENSG00000102580;ENSG00000143184;ENSG00000149534;ENSG00000168394;ENSG00000158874;ENSG00000026751;ENSG00000107485;ENSG00000076944;ENSG00000100292;ENSG00000254087;ENSG00000134516;ENSG00000168811;ENSG00000183918;ENSG00000164342;ENSG00000089692;ENSG00000198821;ENSG00000197943;ENSG00000077348;ENSG00000139178;ENSG00000143507;ENSG00000140678…	ENSG00000110057;ENSG00000172724;ENSG00000164136;ENSG00000102245;ENSG00000102580;ENSG00000143184;ENSG00000149534;ENSG00000168394;ENSG00000158874;ENSG00000026751;ENSG00000107485;ENSG00000076944;ENSG00000100292;ENSG00000254087;ENSG00000134516;ENSG00000168811;ENSG00000183918;ENSG00000164342;ENSG00000089692;ENSG00000198821;ENSG00000197943;ENSG00000077348;ENSG00000139178;ENSG00000143507;ENSG00000140678…	100	ENSG00000110057;ENSG00000172724;ENSG00000164136;ENSG00000102245;ENSG00000102580;ENSG00000143184;ENSG00000149534;ENSG00000168394;ENSG00000158874;ENSG00000026751;ENSG00000107485;ENSG00000076944;ENSG00000100292;ENSG00000254087;ENSG00000134516;ENSG00000168811;ENSG00000183918;ENSG00000164342;ENSG00000089692;ENSG00000198821;ENSG00000197943;ENSG00000077348;ENSG00000139178;ENSG00000140678;ENSG00000166278…	93	81622;6363;3600;959;5611;6375;2206;6890;336;57823;2625;6813;3162;4067;1794;3592;4068;7098;3902;919;5336;56915;51279;3687;717;7099;149233;718;3683;330;695;8993;3558;5734;56253;3055;948;5199;3936;1525;9156;3627;51176;2633;6772;64127;2185;3665;1191;23586;1524;729;2;727;567;3467;939;3105;3662;339;79132;1075;29108;653361;25939;10379;11326;84106;130340;5551;1512;4602;735;7124;7128;5359;3932;3426;729230…	93	ENSG00000110057;ENSG00000172724;ENSG00000164136;ENSG00000102245;ENSG00000102580;ENSG00000143184;ENSG00000149534;ENSG00000168394;ENSG00000158874;ENSG00000026751;ENSG00000107485;ENSG00000076944;ENSG00000100292;ENSG00000254087;ENSG00000134516;ENSG00000168811;ENSG00000183918;ENSG00000164342;ENSG00000089692;ENSG00000198821;ENSG00000197943;ENSG00000077348;ENSG00000139178;ENSG00000143507;ENSG00000140678…	100	ENSG00000143507;ENSG00000138207;ENSG00000197635;ENSG00000069431;ENSG00000119699;ENSG00000171150;ENSG00000121361	7	11221;5950;1803;10060;7043;9655;3764	7
biological process	positive regulation of immune response	GO:0050778	90	1.94	2.62e-09	UNC93B1;KLHL6;CYLD;IL15;CD40LG;CD3E;XCL1;TAP1;GATA3;TLR10;LCP2;MAPK14;LYN;IDO1;HLA-DPA1;IL12A;SH2D1A;TLR3;LAG3;CD247;PLCG2;C1RL;ELF1;NFKB2;CASP8;C2;TLR4;IL23R;C3;BIRC3;BTK;CBLB;PRKCQ;CD14;PTPN22;CRTAM;HCK;CFP;CDK1;PRKCB;NCKAP1L;HLA-DQB2;NOD2;IRF7;CLU;HLA-DRA;DDX58;C6;CD3G;A2M;TNFSF13B;C5;B2M;LPXN;PRKCH;BLK;IRF4;DHX58;PYCARD;TRAT1;VSIG4;CD3D;S100A14;C9;TNF;VAV3;CTLA4;CLEC7A;PLSCR1;TNFAIP3;LCK;HLA-…	81622;89857;1540;3600;959;916;6375;6890;2625;81793;3937;1432;4067;3620;3113;3592;4068;7098;3902;919;5336;51279;1997;4791;841;717;7099;149233;718;330;695;868;5588;929;26191;56253;3055;5199;983;5579;3071;3120;64127;3665;1191;3122;23586;729;917;2;10673;727;567;9404;5583;640;3662;79132;29108;50852;11326;915;57402;735;7124;10451;1493;64581;5359;7128;3932;3117;3426;974;729230;952;2353;972;2822;7294;868…	ENSG00000110057;ENSG00000172578;ENSG00000083799;ENSG00000164136;ENSG00000102245;ENSG00000198851;ENSG00000143184;ENSG00000168394;ENSG00000107485;ENSG00000174123;ENSG00000043462;ENSG00000112062;ENSG00000254087;ENSG00000131203;ENSG00000231389;ENSG00000168811;ENSG00000183918;ENSG00000164342;ENSG00000089692;ENSG00000198821;ENSG00000197943;ENSG00000139178;ENSG00000120690;ENSG00000077150;ENSG00000064012…	ENSG00000110057;ENSG00000172578;ENSG00000083799;ENSG00000164136;ENSG00000102245;ENSG00000198851;ENSG00000143184;ENSG00000168394;ENSG00000107485;ENSG00000174123;ENSG00000043462;ENSG00000112062;ENSG00000254087;ENSG00000131203;ENSG00000231389;ENSG00000168811;ENSG00000183918;ENSG00000164342;ENSG00000089692;ENSG00000198821;ENSG00000197943;ENSG00000139178;ENSG00000120690;ENSG00000077150;ENSG00000064012…	90	ENSG00000110057;ENSG00000172578;ENSG00000083799;ENSG00000164136;ENSG00000102245;ENSG00000198851;ENSG00000143184;ENSG00000168394;ENSG00000107485;ENSG00000174123;ENSG00000043462;ENSG00000112062;ENSG00000254087;ENSG00000131203;ENSG00000231389;ENSG00000168811;ENSG00000183918;ENSG00000164342;ENSG00000089692;ENSG00000198821;ENSG00000197943;ENSG00000139178;ENSG00000120690;ENSG00000077150;ENSG00000064012…	88	81622;89857;1540;3600;959;916;6375;6890;2625;81793;3937;1432;4067;3620;3113;3592;4068;7098;3902;919;5336;51279;1997;4791;841;717;7099;149233;718;330;695;868;5588;929;26191;56253;3055;5199;983;5579;3071;3120;64127;3665;1191;3122;23586;729;917;2;10673;727;567;9404;5583;640;3662;79132;29108;50852;11326;915;57402;735;7124;10451;1493;64581;5359;7128;3932;3117;3426;974;729230;952;972;2822;7294;8685;578…	88	ENSG00000110057;ENSG00000172578;ENSG00000083799;ENSG00000164136;ENSG00000102245;ENSG00000198851;ENSG00000143184;ENSG00000168394;ENSG00000107485;ENSG00000174123;ENSG00000043462;ENSG00000112062;ENSG00000254087;ENSG00000131203;ENSG00000231389;ENSG00000168811;ENSG00000183918;ENSG00000164342;ENSG00000089692;ENSG00000198821;ENSG00000197943;ENSG00000139178;ENSG00000120690;ENSG00000077150;ENSG00000064012…	90	ENSG00000170345;ENSG00000124882	2	2353;2069	2
biological process	system development	GO:0048731	535	1.25	7.78e-09	ADAM19;MREG;RYR1;CD40LG;RECK;NPHS2;AQP1;IL18;HAS2;CCNE1;WEE1;TGFBR3;ZFHX3;PSD;CPE;BOC;MEIS2;SMAD9;MDGA1;GJB2;CAP2;BTK;HLA-DMB;DCT;CD36;LCP1;ASB4;MYH11;RBP4;APOH;ENPP1;TPM1;TNNC1;SCN5A;STOX2;SELP;GLRB;GPSM2;ITGB5;MIP;ELF3;SYCP2;CSRP3;RAC2;PDE6C;OBSL1;CACNB2;SFTPB;LAMB2;CASP1;INHBA;MYB;PNP;HMGCS2;CALCRL;RYR2;FBN2;GCNT4;PLN;SOSTDC1;DGAT2;C1S;COL1A2;PITX3;TRPC3;EPHA7;CDH2;PIK3CG;PTH;TBX5;STX2;ABCB6;S…	8728;55686;6261;959;8434;7827;358;3606;3037;898;7465;7049;463;5662;1363;91653;4212;4093;266727;2706;10486;695;3109;1638;948;3936;51666;4629;5950;350;5167;7168;7134;6331;56977;6403;2743;29899;3693;4284;1999;10388;8048;5880;5146;23363;783;6439;3913;834;3624;4602;4860;3158;10203;6262;2201;51301;5350;25928;84649;716;1278;5309;7222;2045;1000;5294;5741;6910;2054;10058;8796;4921;6444;1555;9362;3162;3925…	ENSG00000135074;ENSG00000118242;ENSG00000196218;ENSG00000102245;ENSG00000122707;ENSG00000116218;ENSG00000240583;ENSG00000150782;ENSG00000170961;ENSG00000105173;ENSG00000166483;ENSG00000069702;ENSG00000140836;ENSG00000059915;ENSG00000109472;ENSG00000144857;ENSG00000134138;ENSG00000120693;ENSG00000112139;ENSG00000165474;ENSG00000112186;ENSG00000010671;ENSG00000242574;ENSG00000080166;ENSG00000135218…	ENSG00000135074;ENSG00000118242;ENSG00000196218;ENSG00000102245;ENSG00000122707;ENSG00000116218;ENSG00000240583;ENSG00000150782;ENSG00000170961;ENSG00000105173;ENSG00000166483;ENSG00000069702;ENSG00000140836;ENSG00000059915;ENSG00000109472;ENSG00000144857;ENSG00000134138;ENSG00000120693;ENSG00000112139;ENSG00000165474;ENSG00000112186;ENSG00000010671;ENSG00000242574;ENSG00000080166;ENSG00000135218…	535	ENSG00000118242;ENSG00000102245;ENSG00000150782;ENSG00000105173;ENSG00000165474;ENSG00000010671;ENSG00000242574;ENSG00000135218;ENSG00000136167;ENSG00000005981;ENSG00000174175;ENSG00000163435;ENSG00000196074;ENSG00000128340;ENSG00000095464;ENSG00000168878;ENSG00000137752;ENSG00000118513;ENSG00000198805;ENSG00000134240;ENSG00000064989;ENSG00000138829;ENSG00000171243;ENSG00000062282;ENSG00000182326…	275	55686;959;3606;898;2706;695;3109;948;3936;51666;6403;1999;10388;5880;5146;6439;834;4602;4860;3158;10203;2201;25928;84649;716;7222;5294;5741;2054;8796;1555;3162;3925;2705;7098;219790;3872;8993;3627;29927;3176;4036;567;2113;1580;914;2937;2146;8879;5787;2719;7128;3676;168002;5140;25861;1576;7294;5788;694;3860;81930;8842;3148;3112;916;344758;51299;3552;3113;5111;3909;28514;7516;7099;718;1285;9963;843…	275	ENSG00000135074;ENSG00000118242;ENSG00000196218;ENSG00000102245;ENSG00000122707;ENSG00000116218;ENSG00000240583;ENSG00000150782;ENSG00000170961;ENSG00000105173;ENSG00000166483;ENSG00000069702;ENSG00000140836;ENSG00000059915;ENSG00000109472;ENSG00000144857;ENSG00000134138;ENSG00000120693;ENSG00000112139;ENSG00000165474;ENSG00000112186;ENSG00000010671;ENSG00000242574;ENSG00000080166;ENSG00000135218…	535	ENSG00000135074;ENSG00000196218;ENSG00000122707;ENSG00000116218;ENSG00000240583;ENSG00000170961;ENSG00000166483;ENSG00000069702;ENSG00000140836;ENSG00000059915;ENSG00000109472;ENSG00000144857;ENSG00000134138;ENSG00000120693;ENSG00000112139;ENSG00000112186;ENSG00000080166;ENSG00000133392;ENSG00000138207;ENSG00000091583;ENSG00000197594;ENSG00000140416;ENSG00000114854;ENSG00000183873;ENSG00000173320…	260	8728;6261;8434;7827;358;3037;7465;7049;463;5662;1363;91653;4212;4093;266727;10486;1638;4629;5950;350;5167;7168;7134;6331;56977;2743;29899;3693;4284;8048;23363;783;3913;3624;6262;51301;5350;1278;5309;2045;1000;6910;10058;4921;6444;9362;5954;51339;4015;54961;91807;1292;6594;7481;27295;25937;5066;348980;27286;8100;3696;2690;55553;5694;23189;7424;57493;54360;6424;81029;2775;27122;8013;3685;130497;106…	260
biological process	regulation of multicellular organismal process	GO:0051239	290	1.39	8.31e-09	CD40LG;DES;AQP1;GATA3;SCGB1A1;IL18;CCNB1;IDO1;IL12A;TGFBR3;CTGF;RIMS1;ZFHX3;TACSTD2;BOC;IL2;BTK;KCNA5;DCT;CD36;SLC8A1;ASB4;RBP4;APOH;HHEX;ENPP1;UCMA;NCKAP1L;BAMBI;HEMGN;NOD2;TPM1;DDX58;TNNC1;SCN5A;EGR1;SELP;PRKAA1;ANKH;OPHN1;C5;SULF1;CD27;BMP2K;CSRP3;CYR61;PRKG1;TSPAN12;CASP1;INHBA;EPHB3;SOCS5;MYB;CXCL13;PNP;PMP22;CALCRL;RYR2;FBN2;ADRB2;NFIB;LCAT;PLN;NR4A2;IFIH1;CDH2;PIK3CG;SNCAIP;PTH;IRF1;TBX5;X…	959;1674;358;2625;7356;3606;891;3620;3592;7049;1490;22999;463;4070;91653;3558;695;3741;1638;948;6546;51666;5950;350;3087;5167;221044;3071;25805;55363;64127;7168;23586;7134;6331;1958;6403;5562;56172;4983;727;23213;939;55589;8048;3491;5592;23554;834;3624;2049;9655;4602;10563;4860;5376;10203;6262;2201;154;4781;3931;5350;4929;64135;1000;5294;9627;5741;3659;6910;6375;9500;5037;4921;3162;2322;5139;5341…	ENSG00000102245;ENSG00000175084;ENSG00000240583;ENSG00000107485;ENSG00000149021;ENSG00000150782;ENSG00000134057;ENSG00000131203;ENSG00000168811;ENSG00000069702;ENSG00000118523;ENSG00000079841;ENSG00000140836;ENSG00000184292;ENSG00000144857;ENSG00000109471;ENSG00000010671;ENSG00000130037;ENSG00000080166;ENSG00000135218;ENSG00000183023;ENSG00000005981;ENSG00000138207;ENSG00000091583;ENSG00000152804…	ENSG00000102245;ENSG00000175084;ENSG00000240583;ENSG00000107485;ENSG00000149021;ENSG00000150782;ENSG00000134057;ENSG00000131203;ENSG00000168811;ENSG00000069702;ENSG00000118523;ENSG00000079841;ENSG00000140836;ENSG00000184292;ENSG00000144857;ENSG00000109471;ENSG00000010671;ENSG00000130037;ENSG00000080166;ENSG00000135218;ENSG00000183023;ENSG00000005981;ENSG00000138207;ENSG00000091583;ENSG00000152804…	290	ENSG00000102245;ENSG00000107485;ENSG00000149021;ENSG00000150782;ENSG00000134057;ENSG00000131203;ENSG00000168811;ENSG00000184292;ENSG00000109471;ENSG00000010671;ENSG00000135218;ENSG00000005981;ENSG00000152804;ENSG00000123338;ENSG00000136929;ENSG00000167207;ENSG00000107201;ENSG00000174175;ENSG00000132356;ENSG00000106804;ENSG00000139193;ENSG00000138756;ENSG00000106025;ENSG00000137752;ENSG00000118513…	164	959;2625;7356;3606;891;3620;3592;4070;3558;695;948;51666;3087;3071;55363;64127;23586;6403;5562;727;939;55589;23554;834;4602;10563;4860;10203;2201;154;64135;5294;5741;3659;6375;3162;2322;5341;7098;3902;1997;6863;841;3872;8993;283420;5588;56253;3627;22806;5579;79625;6772;1636;2113;6714;914;2146;8879;79132;10658;27035;1512;7050;7128;3932;729230;5140;2011;2822;7294;5788;694;8842;10392;51752;3148;5767…	164	ENSG00000102245;ENSG00000175084;ENSG00000240583;ENSG00000107485;ENSG00000149021;ENSG00000150782;ENSG00000134057;ENSG00000131203;ENSG00000168811;ENSG00000069702;ENSG00000118523;ENSG00000079841;ENSG00000140836;ENSG00000184292;ENSG00000144857;ENSG00000109471;ENSG00000010671;ENSG00000130037;ENSG00000080166;ENSG00000135218;ENSG00000183023;ENSG00000005981;ENSG00000138207;ENSG00000091583;ENSG00000152804…	290	ENSG00000175084;ENSG00000240583;ENSG00000069702;ENSG00000118523;ENSG00000079841;ENSG00000140836;ENSG00000144857;ENSG00000130037;ENSG00000080166;ENSG00000183023;ENSG00000138207;ENSG00000091583;ENSG00000197594;ENSG00000165623;ENSG00000095739;ENSG00000140416;ENSG00000114854;ENSG00000183873;ENSG00000120738;ENSG00000154122;ENSG00000079482;ENSG00000137573;ENSG00000129170;ENSG00000142871;ENSG00000185532…	126	1674;358;7049;1490;22999;463;91653;3741;1638;6546;5950;350;5167;221044;25805;7168;7134;6331;1958;56172;4983;23213;8048;3491;5592;3624;2049;9655;5376;6262;4781;3931;5350;4929;1000;9627;6910;9500;5037;4921;5139;65266;51339;2191;54961;7481;9365;25937;1749;9966;10468;10234;27286;8100;2690;54206;55553;7424;23189;3623;51654;6424;2775;9096;6259;130497;10660;59272;1129;1649;133522;29995;57447;4741;6935;1…	126
biological process	response to biotic stimulus	GO:0009607	121	1.72	9.92e-09	UNC93B1;LCN2;CCL19;IL15;CD40LG;DNAJC3;XCL1;IFI44;S100A8;GATA3;IL18;IL1A;MAPK14;ARG1;LYN;STMN1;DOCK2;IDO1;ABCC8;IL12A;AQP2;JAG1;MMP7;TLR3;CD247;PLCG2;EXOSC5;SFTPC;DUSP10;TAC1;ITGAX;CASP8;ANKRD1;TLR4;IL23R;ABCC5;DEFA4;BIRC3;SELE;PGLYRP1;HSPA5;PTGER4;CD14;CAMP;CRTAM;HCK;CD36;CFP;ADM;MGST1;CXADR;PTGS2;CXCL10;HNMT;GBP1;IL8;STAT1;NOD2;IRF7;CLU;ABCA1;DDX58;PLSCR4;CX3CR1;SELP;LYZ;B2M;IFNW1;TNFSF8;XPR1;HL…	81622;3934;6363;3600;959;5611;6375;10561;6279;2625;3606;3552;1432;383;4067;3925;1794;3620;6833;3592;359;182;4316;7098;919;5336;56915;6440;11221;6863;3687;841;27063;7099;149233;10057;1669;330;6401;8993;3309;5734;929;820;56253;3055;948;5199;133;4257;1525;5743;3627;3176;2633;3576;6772;64127;3665;1191;19;23586;57088;1524;6403;4069;567;3467;944;9213;3105;10060;339;79132;6678;29108;6439;653361;25939;10…	ENSG00000110057;ENSG00000148346;ENSG00000172724;ENSG00000164136;ENSG00000102245;ENSG00000102580;ENSG00000143184;ENSG00000137965;ENSG00000143546;ENSG00000107485;ENSG00000150782;ENSG00000115008;ENSG00000112062;ENSG00000118520;ENSG00000254087;ENSG00000117632;ENSG00000134516;ENSG00000131203;ENSG00000006071;ENSG00000168811;ENSG00000167580;ENSG00000101384;ENSG00000137673;ENSG00000164342;ENSG00000198821…	ENSG00000110057;ENSG00000148346;ENSG00000172724;ENSG00000164136;ENSG00000102245;ENSG00000102580;ENSG00000143184;ENSG00000137965;ENSG00000143546;ENSG00000107485;ENSG00000150782;ENSG00000115008;ENSG00000112062;ENSG00000118520;ENSG00000254087;ENSG00000117632;ENSG00000134516;ENSG00000131203;ENSG00000006071;ENSG00000168811;ENSG00000167580;ENSG00000101384;ENSG00000137673;ENSG00000164342;ENSG00000198821…	121	ENSG00000110057;ENSG00000148346;ENSG00000172724;ENSG00000164136;ENSG00000102245;ENSG00000102580;ENSG00000143184;ENSG00000137965;ENSG00000143546;ENSG00000107485;ENSG00000150782;ENSG00000115008;ENSG00000112062;ENSG00000118520;ENSG00000254087;ENSG00000117632;ENSG00000134516;ENSG00000131203;ENSG00000168811;ENSG00000167580;ENSG00000137673;ENSG00000164342;ENSG00000198821;ENSG00000197943;ENSG00000077348…	101	81622;3934;6363;3600;959;5611;6375;10561;6279;2625;3606;3552;1432;383;4067;3925;1794;3620;3592;359;4316;7098;919;5336;56915;6440;6863;3687;841;7099;149233;1669;330;8993;3309;5734;929;820;56253;3055;948;5199;4257;1525;3627;3176;2633;3576;6772;64127;3665;1191;19;23586;1524;6403;4069;567;3467;944;9213;3105;339;79132;29108;6439;653361;25939;10379;57402;130340;6280;834;5551;7124;64581;10563;7128;5359;…	101	ENSG00000110057;ENSG00000148346;ENSG00000172724;ENSG00000164136;ENSG00000102245;ENSG00000102580;ENSG00000143184;ENSG00000137965;ENSG00000143546;ENSG00000107485;ENSG00000150782;ENSG00000115008;ENSG00000112062;ENSG00000118520;ENSG00000254087;ENSG00000117632;ENSG00000134516;ENSG00000131203;ENSG00000006071;ENSG00000168811;ENSG00000167580;ENSG00000101384;ENSG00000137673;ENSG00000164342;ENSG00000198821…	121	ENSG00000006071;ENSG00000101384;ENSG00000143507;ENSG00000148677;ENSG00000114770;ENSG00000007908;ENSG00000148926;ENSG00000073756;ENSG00000114698;ENSG00000069431;ENSG00000113140;ENSG00000107796;ENSG00000186009;ENSG00000021826;ENSG00000121361;ENSG00000170345;ENSG00000075651;ENSG00000130234;ENSG00000164116;ENSG00000181072	20	6833;182;11221;27063;10057;6401;133;5743;57088;10060;6678;59;496;1373;3764;2353;5337;59272;2982;1129	20
biological process	response to other organism	GO:0051707	117	1.73	1.32e-08	UNC93B1;LCN2;CCL19;IL15;DNAJC3;XCL1;IFI44;S100A8;GATA3;IL18;IL1A;MAPK14;ARG1;LYN;STMN1;DOCK2;IDO1;ABCC8;IL12A;AQP2;JAG1;MMP7;TLR3;CD247;PLCG2;EXOSC5;SFTPC;DUSP10;TAC1;ITGAX;CASP8;ANKRD1;TLR4;IL23R;ABCC5;DEFA4;BIRC3;SELE;PGLYRP1;PTGER4;CD14;CAMP;HCK;CD36;CFP;ADM;MGST1;CXADR;CXCL10;PTGS2;GBP1;IL8;STAT1;NOD2;IRF7;CLU;ABCA1;DDX58;PLSCR4;SELP;CX3CR1;LYZ;B2M;IFNW1;TNFSF8;HLA-A;XPR1;ABCC9;APOBEC1;DHX58;…	81622;3934;6363;3600;5611;6375;10561;6279;2625;3606;3552;1432;383;4067;3925;1794;3620;6833;3592;359;182;4316;7098;919;5336;56915;6440;11221;6863;3687;841;27063;7099;149233;10057;1669;330;6401;8993;5734;929;820;3055;948;5199;133;4257;1525;3627;5743;2633;3576;6772;64127;3665;1191;19;23586;57088;6403;1524;4069;567;3467;944;3105;9213;10060;339;79132;6678;29108;6439;653361;25939;10379;59;57402;130340;…	ENSG00000110057;ENSG00000148346;ENSG00000172724;ENSG00000164136;ENSG00000102580;ENSG00000143184;ENSG00000137965;ENSG00000143546;ENSG00000107485;ENSG00000150782;ENSG00000115008;ENSG00000112062;ENSG00000118520;ENSG00000254087;ENSG00000117632;ENSG00000134516;ENSG00000131203;ENSG00000006071;ENSG00000168811;ENSG00000167580;ENSG00000101384;ENSG00000137673;ENSG00000164342;ENSG00000198821;ENSG00000197943…	ENSG00000110057;ENSG00000148346;ENSG00000172724;ENSG00000164136;ENSG00000102580;ENSG00000143184;ENSG00000137965;ENSG00000143546;ENSG00000107485;ENSG00000150782;ENSG00000115008;ENSG00000112062;ENSG00000118520;ENSG00000254087;ENSG00000117632;ENSG00000134516;ENSG00000131203;ENSG00000006071;ENSG00000168811;ENSG00000167580;ENSG00000101384;ENSG00000137673;ENSG00000164342;ENSG00000198821;ENSG00000197943…	117	ENSG00000110057;ENSG00000148346;ENSG00000172724;ENSG00000164136;ENSG00000102580;ENSG00000143184;ENSG00000137965;ENSG00000143546;ENSG00000107485;ENSG00000150782;ENSG00000115008;ENSG00000112062;ENSG00000118520;ENSG00000254087;ENSG00000117632;ENSG00000134516;ENSG00000131203;ENSG00000168811;ENSG00000167580;ENSG00000137673;ENSG00000164342;ENSG00000198821;ENSG00000197943;ENSG00000077348;ENSG00000168484…	97	81622;3934;6363;3600;5611;6375;10561;6279;2625;3606;3552;1432;383;4067;3925;1794;3620;3592;359;4316;7098;919;5336;56915;6440;6863;3687;841;7099;149233;1669;330;8993;5734;929;820;3055;948;5199;4257;1525;3627;2633;3576;6772;64127;3665;1191;19;23586;6403;1524;4069;567;3467;944;3105;9213;339;79132;29108;6439;653361;25939;10379;57402;130340;6280;834;5551;7124;64581;10563;7128;5359;3932;3158;10577;5560…	97	ENSG00000110057;ENSG00000148346;ENSG00000172724;ENSG00000164136;ENSG00000102580;ENSG00000143184;ENSG00000137965;ENSG00000143546;ENSG00000107485;ENSG00000150782;ENSG00000115008;ENSG00000112062;ENSG00000118520;ENSG00000254087;ENSG00000117632;ENSG00000134516;ENSG00000131203;ENSG00000006071;ENSG00000168811;ENSG00000167580;ENSG00000101384;ENSG00000137673;ENSG00000164342;ENSG00000198821;ENSG00000197943…	117	ENSG00000006071;ENSG00000101384;ENSG00000143507;ENSG00000148677;ENSG00000114770;ENSG00000007908;ENSG00000148926;ENSG00000073756;ENSG00000114698;ENSG00000069431;ENSG00000113140;ENSG00000107796;ENSG00000186009;ENSG00000021826;ENSG00000121361;ENSG00000170345;ENSG00000075651;ENSG00000130234;ENSG00000164116;ENSG00000181072	20	6833;182;11221;27063;10057;6401;133;5743;57088;10060;6678;59;496;1373;3764;2353;5337;59272;2982;1129	20
biological process	regulation of response to stimulus	GO:0048583	373	1.31	2.54e-08	CD200R1;DUSP8;CD40LG;TAP1;S100A8;GATA3;SCGB1A1;IL18;SEPT4;IDO1;IL12A;SH2D1A;TGFBR3;CTGF;PSD;RSPO1;IL2;BTK;AKAP12;TNFSF10;HCK;CD36;APOH;HHEX;ENPP1;NCKAP1L;BAMBI;FBP1;NOD2;DDX58;TAGAP;HCST;KLB;EGR1;IQSEC3;SELP;PRKAA1;GADD45G;CD3G;OPHN1;ACAP1;C5;SULF1;NEDD4L;GPSM2;CD27;COL3A1;KIAA1161;RAC2;CYR61;TTK;PRKG1;CASP1;INHBA;EPHB3;SOCS5;MYB;CXCL13;CALCRL;FBN2;ADRB2;CDC42BPA;FAM162A;ROS1;PLA2G2A;DKK2;RGS18;S…	131450;1850;959;6890;6279;2625;7356;3606;5414;3620;3592;4068;7049;1490;5662;284654;3558;695;9590;8743;3055;948;350;3087;5167;3071;25805;2203;64127;23586;117289;10870;152831;1958;440073;6403;5562;10912;917;4983;9744;727;23213;23327;29899;939;1281;57462;5880;3491;7272;5592;834;3624;2049;9655;4602;10563;10203;2201;154;8476;26355;6098;5320;27123;64407;25928;9982;1378;10068;55785;716;64135;2045;1000;2…	ENSG00000163606;ENSG00000184545;ENSG00000102245;ENSG00000168394;ENSG00000143546;ENSG00000107485;ENSG00000149021;ENSG00000150782;ENSG00000108387;ENSG00000131203;ENSG00000168811;ENSG00000183918;ENSG00000069702;ENSG00000118523;ENSG00000059915;ENSG00000169218;ENSG00000109471;ENSG00000010671;ENSG00000131016;ENSG00000121858;ENSG00000101336;ENSG00000135218;ENSG00000091583;ENSG00000152804;ENSG00000197594…	ENSG00000163606;ENSG00000184545;ENSG00000102245;ENSG00000168394;ENSG00000143546;ENSG00000107485;ENSG00000149021;ENSG00000150782;ENSG00000108387;ENSG00000131203;ENSG00000168811;ENSG00000183918;ENSG00000069702;ENSG00000118523;ENSG00000059915;ENSG00000169218;ENSG00000109471;ENSG00000010671;ENSG00000131016;ENSG00000121858;ENSG00000101336;ENSG00000135218;ENSG00000091583;ENSG00000152804;ENSG00000197594…	373	ENSG00000163606;ENSG00000102245;ENSG00000168394;ENSG00000143546;ENSG00000107485;ENSG00000149021;ENSG00000150782;ENSG00000108387;ENSG00000131203;ENSG00000168811;ENSG00000183918;ENSG00000169218;ENSG00000109471;ENSG00000010671;ENSG00000121858;ENSG00000101336;ENSG00000135218;ENSG00000152804;ENSG00000123338;ENSG00000165140;ENSG00000167207;ENSG00000107201;ENSG00000164691;ENSG00000126264;ENSG00000134962…	246	131450;959;6890;6279;2625;7356;3606;5414;3620;3592;4068;284654;3558;695;8743;3055;948;3087;3071;2203;64127;23586;117289;10870;152831;6403;5562;917;9744;727;23327;939;5880;7272;834;4602;10563;10203;2201;154;6098;5320;64407;25928;1378;10068;55785;716;64135;5294;5741;3659;9824;89857;9938;6375;8601;3937;3162;2322;5341;10225;7098;23527;3902;1997;253260;6863;841;64092;8085;8993;5588;56253;4864;3627;557…	246	ENSG00000163606;ENSG00000184545;ENSG00000102245;ENSG00000168394;ENSG00000143546;ENSG00000107485;ENSG00000149021;ENSG00000150782;ENSG00000108387;ENSG00000131203;ENSG00000168811;ENSG00000183918;ENSG00000069702;ENSG00000118523;ENSG00000059915;ENSG00000169218;ENSG00000109471;ENSG00000010671;ENSG00000131016;ENSG00000121858;ENSG00000101336;ENSG00000135218;ENSG00000091583;ENSG00000152804;ENSG00000197594…	373	ENSG00000184545;ENSG00000069702;ENSG00000118523;ENSG00000059915;ENSG00000131016;ENSG00000091583;ENSG00000197594;ENSG00000095739;ENSG00000134962;ENSG00000120738;ENSG00000120645;ENSG00000130222;ENSG00000079482;ENSG00000137573;ENSG00000121957;ENSG00000168542;ENSG00000164976;ENSG00000142871;ENSG00000185532;ENSG00000122641;ENSG00000182580;ENSG00000171150;ENSG00000143776;ENSG00000114023;ENSG00000155011…	128	1850;7049;1490;5662;9590;350;5167;25805;152831;1958;440073;10912;4983;23213;29899;1281;57462;3491;5592;3624;2049;9655;8476;26355;27123;9982;2045;1000;22866;79658;115265;9500;5037;9372;51339;5149;80114;57514;2191;7481;9365;25937;84451;51495;1749;9966;10468;6000;55701;2690;4852;54206;10253;23189;7424;10276;55288;2353;8425;6424;81029;27122;9096;6259;59272;1649;11216;4052;133522;29995;57447;9104;1122…	128
biological process	innate immune response	GO:0045087	105	1.76	4.14e-08	UNC93B1;PTAFR;CYLD;LCN2;TNFAIP8L2;TAP1;SLAMF7;S100A8;IL18;TLR10;MAPK14;GBP5;LYN;HLA-DPA1;IL12A;SH2D1A;PSMB8;TLR3;LAG3;C1RL;DUSP10;CORO1A;NFKB2;CASP8;C2;BPIFA1;TLR4;IL23R;SRPK2;C3;DEFA4;BIRC3;USP18;BTK;PGLYRP1;CD14;PTPN22;CRTAM;HCK;CFP;MEFV;CDK1;SEC61A1;KYNU;GBP1;HLA-DQB2;STAT1;NOD2;VCAM1;IRF7;CLU;HLA-DRA;DDX58;EGR1;LGALS3;C6;A2M;C5;B2M;IL18R1;HLA-A;PTPN2;IRF4;CLEC4A;DHX58;PTPN1;CTSS;UBA7;PYCARD;A…	81622;5724;1540;3934;79626;6890;57823;6279;3606;81793;1432;115362;4067;3113;3592;4068;5696;7098;3902;51279;11221;11151;4791;841;717;51297;7099;149233;6733;718;1669;330;11274;695;8993;929;26191;56253;3055;5199;4210;983;29927;8942;2633;3120;6772;64127;7412;3665;1191;3122;23586;1958;3958;729;2;727;567;8809;3105;5771;3662;50856;79132;5770;1520;7318;29108;361;653361;25939;10379;11326;23601;57402;33833…	ENSG00000110057;ENSG00000169403;ENSG00000083799;ENSG00000148346;ENSG00000163154;ENSG00000168394;ENSG00000026751;ENSG00000143546;ENSG00000150782;ENSG00000174123;ENSG00000112062;ENSG00000154451;ENSG00000254087;ENSG00000231389;ENSG00000168811;ENSG00000183918;ENSG00000204264;ENSG00000164342;ENSG00000089692;ENSG00000139178;ENSG00000143507;ENSG00000102879;ENSG00000077150;ENSG00000064012;ENSG00000166278…	ENSG00000110057;ENSG00000169403;ENSG00000083799;ENSG00000148346;ENSG00000163154;ENSG00000168394;ENSG00000026751;ENSG00000143546;ENSG00000150782;ENSG00000174123;ENSG00000112062;ENSG00000154451;ENSG00000254087;ENSG00000231389;ENSG00000168811;ENSG00000183918;ENSG00000204264;ENSG00000164342;ENSG00000089692;ENSG00000139178;ENSG00000143507;ENSG00000102879;ENSG00000077150;ENSG00000064012;ENSG00000166278…	105	ENSG00000110057;ENSG00000169403;ENSG00000083799;ENSG00000148346;ENSG00000163154;ENSG00000168394;ENSG00000026751;ENSG00000143546;ENSG00000150782;ENSG00000174123;ENSG00000112062;ENSG00000154451;ENSG00000254087;ENSG00000231389;ENSG00000168811;ENSG00000183918;ENSG00000204264;ENSG00000164342;ENSG00000089692;ENSG00000139178;ENSG00000102879;ENSG00000077150;ENSG00000064012;ENSG00000166278;ENSG00000198183…	100	81622;5724;1540;3934;79626;6890;57823;6279;3606;81793;1432;115362;4067;3113;3592;4068;5696;7098;3902;51279;11151;4791;841;717;51297;7099;149233;718;1669;330;11274;695;8993;929;26191;56253;3055;5199;4210;983;29927;8942;2633;3120;6772;64127;7412;3665;1191;3122;23586;3958;729;2;727;567;8809;3105;5771;3662;50856;79132;5770;1520;7318;29108;361;653361;25939;10379;11326;23601;57402;338339;960;834;6280;8…	100	ENSG00000110057;ENSG00000169403;ENSG00000083799;ENSG00000148346;ENSG00000163154;ENSG00000168394;ENSG00000026751;ENSG00000143546;ENSG00000150782;ENSG00000174123;ENSG00000112062;ENSG00000154451;ENSG00000254087;ENSG00000231389;ENSG00000168811;ENSG00000183918;ENSG00000204264;ENSG00000164342;ENSG00000089692;ENSG00000139178;ENSG00000143507;ENSG00000102879;ENSG00000077150;ENSG00000064012;ENSG00000166278…	105	ENSG00000143507;ENSG00000135250;ENSG00000120738;ENSG00000170345;ENSG00000124882	5	11221;6733;1958;2353;2069	5
biological process	anatomical structure development	GO:0048856	597	1.21	7.29e-08	ADAM19;MREG;RYR1;CD40LG;RECK;NPHS2;AQP1;IL18;HAS2;CCNE1;WEE1;TGFBR3;ZFHX3;PSD;CPE;BOC;MEIS2;SMAD9;MDGA1;GJB2;CAP2;BTK;HLA-DMB;DCT;CD36;LCP1;ASB4;MYH11;RBP4;APOH;ENPP1;TPM1;TNNC1;SCN5A;STOX2;SELP;GLRB;TJP1;GPSM2;ITGB5;MIP;ELF3;SYCP2;CSRP3;RAC2;PDE6C;OBSL1;CACNB2;SFTPB;LAMB2;CASP1;INHBA;MYB;PNP;HMGCS2;CALCRL;RYR2;FBN2;ROS1;GCNT4;PLN;SOSTDC1;DGAT2;C1S;COL1A2;PITX3;TRPC3;EPHA7;CDH2;PIK3CG;PTH;CSRP2;T…	8728;55686;6261;959;8434;7827;358;3606;3037;898;7465;7049;463;5662;1363;91653;4212;4093;266727;2706;10486;695;3109;1638;948;3936;51666;4629;5950;350;5167;7168;7134;6331;56977;6403;2743;7082;29899;3693;4284;1999;10388;8048;5880;5146;23363;783;6439;3913;834;3624;4602;4860;3158;10203;6262;2201;6098;51301;5350;25928;84649;716;1278;5309;7222;2045;1000;5294;5741;1466;6910;2054;10058;8796;4921;6444;1555…	ENSG00000135074;ENSG00000118242;ENSG00000196218;ENSG00000102245;ENSG00000122707;ENSG00000116218;ENSG00000240583;ENSG00000150782;ENSG00000170961;ENSG00000105173;ENSG00000166483;ENSG00000069702;ENSG00000140836;ENSG00000059915;ENSG00000109472;ENSG00000144857;ENSG00000134138;ENSG00000120693;ENSG00000112139;ENSG00000165474;ENSG00000112186;ENSG00000010671;ENSG00000242574;ENSG00000080166;ENSG00000135218…	ENSG00000135074;ENSG00000118242;ENSG00000196218;ENSG00000102245;ENSG00000122707;ENSG00000116218;ENSG00000240583;ENSG00000150782;ENSG00000170961;ENSG00000105173;ENSG00000166483;ENSG00000069702;ENSG00000140836;ENSG00000059915;ENSG00000109472;ENSG00000144857;ENSG00000134138;ENSG00000120693;ENSG00000112139;ENSG00000165474;ENSG00000112186;ENSG00000010671;ENSG00000242574;ENSG00000080166;ENSG00000135218…	597	ENSG00000118242;ENSG00000102245;ENSG00000150782;ENSG00000105173;ENSG00000165474;ENSG00000010671;ENSG00000242574;ENSG00000135218;ENSG00000136167;ENSG00000005981;ENSG00000174175;ENSG00000163435;ENSG00000196074;ENSG00000128340;ENSG00000095464;ENSG00000168878;ENSG00000137752;ENSG00000118513;ENSG00000198805;ENSG00000134240;ENSG00000064989;ENSG00000138829;ENSG00000047936;ENSG00000171243;ENSG00000062282…	316	55686;959;3606;898;2706;695;3109;948;3936;51666;6403;1999;10388;5880;5146;6439;834;4602;4860;3158;10203;2201;6098;25928;84649;716;7222;5294;5741;2054;8796;1555;3162;3925;2705;7098;3854;752;219790;253260;3872;8085;8993;3627;26298;29927;3176;129293;4036;567;2113;1580;914;2937;2146;8879;5787;2719;7128;3676;168002;5140;25861;1576;7294;5788;694;3860;81930;8842;5426;3148;3112;916;344758;51299;56990;355…	316	ENSG00000135074;ENSG00000118242;ENSG00000196218;ENSG00000102245;ENSG00000122707;ENSG00000116218;ENSG00000240583;ENSG00000150782;ENSG00000170961;ENSG00000105173;ENSG00000166483;ENSG00000069702;ENSG00000140836;ENSG00000059915;ENSG00000109472;ENSG00000144857;ENSG00000134138;ENSG00000120693;ENSG00000112139;ENSG00000165474;ENSG00000112186;ENSG00000010671;ENSG00000242574;ENSG00000080166;ENSG00000135218…	597	ENSG00000135074;ENSG00000196218;ENSG00000122707;ENSG00000116218;ENSG00000240583;ENSG00000170961;ENSG00000166483;ENSG00000069702;ENSG00000140836;ENSG00000059915;ENSG00000109472;ENSG00000144857;ENSG00000134138;ENSG00000120693;ENSG00000112139;ENSG00000112186;ENSG00000080166;ENSG00000133392;ENSG00000138207;ENSG00000091583;ENSG00000197594;ENSG00000140416;ENSG00000114854;ENSG00000183873;ENSG00000173320…	281	8728;6261;8434;7827;358;3037;7465;7049;463;5662;1363;91653;4212;4093;266727;10486;1638;4629;5950;350;5167;7168;7134;6331;56977;2743;7082;29899;3693;4284;8048;23363;783;3913;3624;6262;51301;5350;1278;5309;2045;1000;1466;6910;10058;4921;6444;9362;5954;51339;55582;4015;54961;91807;1292;6594;7481;27295;25937;5066;348980;27286;8100;3696;2690;55553;5694;23189;7424;57493;54360;6424;81029;2775;27122;8013…	281
biological process	cell activation	GO:0001775	149	1.58	7.49e-08	CCL19;CD40LG;CD3E;MS4A2;SLAMF7;GATA3;SCGB1A1;IL18;FGG;MAPK14;CD5;IDO1;HLA-DPA1;IL12A;CTGF;CD247;TLR4;RASGRP1;ITGAL;ABCC4;SKAP2;IL2;BTK;HSPA5;CBLB;VEGFA;CD36;GNA14;LCP1;GNAI1;HHEX;LEF1;NCKAP1L;IL8;NOD2;PTK2B;DPP4;VCAM1;CLU;HLA-DRA;SHB;RUNX2;EGR1;SERPINE2;SELP;A2M;CD3G;TNFSF8;CD27;SATB1;SPINK5;COL3A1;BMPER;RAC2;PYCARD;TGFB3;PRKG1;CD3D;WNT3A;CASP1;INHBA;MYB;SOCS5;CTLA4;PNP;CD38;BLNK;RAB27A;PSMB10;SP…	6363;959;916;2206;57823;2625;7356;3606;2266;1432;921;3620;3113;3592;1490;919;7099;10125;3683;10257;8935;3558;695;3309;868;7422;948;9630;3936;2770;3087;51176;3071;3576;64127;2185;1803;7412;1191;3122;6461;860;1958;5270;6403;2;917;944;939;6304;11005;1281;168667;5880;29108;7043;5592;915;89780;834;3624;4602;9655;1493;4860;952;29760;5873;5699;6708;961;1278;7222;5294;3659;3600;6375;6813;6288;3937;4067;2…	ENSG00000172724;ENSG00000102245;ENSG00000198851;ENSG00000149534;ENSG00000026751;ENSG00000107485;ENSG00000149021;ENSG00000150782;ENSG00000171557;ENSG00000112062;ENSG00000110448;ENSG00000131203;ENSG00000231389;ENSG00000168811;ENSG00000118523;ENSG00000198821;ENSG00000136869;ENSG00000172575;ENSG00000005844;ENSG00000125257;ENSG00000005020;ENSG00000109471;ENSG00000010671;ENSG00000044574;ENSG00000114423…	ENSG00000172724;ENSG00000102245;ENSG00000198851;ENSG00000149534;ENSG00000026751;ENSG00000107485;ENSG00000149021;ENSG00000150782;ENSG00000171557;ENSG00000112062;ENSG00000110448;ENSG00000131203;ENSG00000231389;ENSG00000168811;ENSG00000118523;ENSG00000198821;ENSG00000136869;ENSG00000172575;ENSG00000005844;ENSG00000125257;ENSG00000005020;ENSG00000109471;ENSG00000010671;ENSG00000044574;ENSG00000114423…	149	ENSG00000172724;ENSG00000102245;ENSG00000198851;ENSG00000149534;ENSG00000026751;ENSG00000107485;ENSG00000149021;ENSG00000150782;ENSG00000171557;ENSG00000112062;ENSG00000110448;ENSG00000131203;ENSG00000231389;ENSG00000168811;ENSG00000198821;ENSG00000136869;ENSG00000172575;ENSG00000005844;ENSG00000125257;ENSG00000005020;ENSG00000109471;ENSG00000010671;ENSG00000044574;ENSG00000114423;ENSG00000112715…	131	6363;959;916;2206;57823;2625;7356;3606;2266;1432;921;3620;3113;3592;919;7099;10125;3683;10257;8935;3558;695;3309;868;7422;948;3936;3087;51176;3071;3576;64127;2185;7412;1191;3122;6461;860;5270;6403;2;917;944;939;6304;168667;5880;29108;915;89780;834;4602;1493;4860;952;29760;5873;5699;6708;961;7222;5294;3659;3600;6375;6813;6288;3937;4067;2322;3162;1794;5341;7098;3902;5336;253260;6863;11151;4791;6409…	131	ENSG00000172724;ENSG00000102245;ENSG00000198851;ENSG00000149534;ENSG00000026751;ENSG00000107485;ENSG00000149021;ENSG00000150782;ENSG00000171557;ENSG00000112062;ENSG00000110448;ENSG00000131203;ENSG00000231389;ENSG00000168811;ENSG00000118523;ENSG00000198821;ENSG00000136869;ENSG00000172575;ENSG00000005844;ENSG00000125257;ENSG00000005020;ENSG00000109471;ENSG00000010671;ENSG00000044574;ENSG00000114423…	149	ENSG00000118523;ENSG00000156049;ENSG00000127955;ENSG00000197635;ENSG00000120738;ENSG00000133710;ENSG00000168542;ENSG00000119699;ENSG00000185532;ENSG00000122641;ENSG00000171150;ENSG00000164692;ENSG00000126583;ENSG00000077522;ENSG00000048052;ENSG00000113140;ENSG00000150630;ENSG00000123999	18	1490;9630;2770;1803;1958;11005;1281;7043;5592;3624;9655;1278;5582;88;9734;6678;7424;3623	18
biological process	activation of immune response	GO:0002253	74	1.95	7.52e-08	UNC93B1;KLHL6;CYLD;CD3E;GATA3;TLR10;LCP2;MAPK14;LYN;HLA-DPA1;TLR3;CD247;PLCG2;C1RL;ELF1;NFKB2;CASP8;C2;TLR4;C3;BIRC3;BTK;CBLB;PRKCQ;CD14;PTPN22;HCK;CFP;CDK1;PRKCB;NCKAP1L;HLA-DQB2;NOD2;IRF7;CLU;HLA-DRA;DDX58;C6;CD3G;A2M;C5;LPXN;PRKCH;BLK;IRF4;DHX58;PYCARD;TRAT1;VSIG4;CD3D;S100A14;C9;VAV3;CTLA4;CLEC7A;PLSCR1;TNFAIP3;LCK;HLA-DQA1;CD79B;CFI;CD38;FOS;TXK;GPLD1;MARCO;PTPRC;NOD1;ZAP70;CR1;NFKBIA;C1S;IF…	81622;89857;1540;916;2625;81793;3937;1432;4067;3113;7098;919;5336;51279;1997;4791;841;717;7099;718;330;695;868;5588;929;26191;3055;5199;983;5579;3071;3120;64127;3665;1191;3122;23586;729;917;2;727;9404;5583;640;3662;79132;29108;50852;11326;915;57402;735;10451;1493;64581;5359;7128;3932;3117;974;3426;952;2353;7294;2822;8685;5788;10392;7535;1378;4792;716;64135;3659	ENSG00000110057;ENSG00000172578;ENSG00000083799;ENSG00000198851;ENSG00000107485;ENSG00000174123;ENSG00000043462;ENSG00000112062;ENSG00000254087;ENSG00000231389;ENSG00000164342;ENSG00000198821;ENSG00000197943;ENSG00000139178;ENSG00000120690;ENSG00000077150;ENSG00000064012;ENSG00000166278;ENSG00000136869;ENSG00000125730;ENSG00000023445;ENSG00000010671;ENSG00000114423;ENSG00000065675;ENSG00000170458…	ENSG00000110057;ENSG00000172578;ENSG00000083799;ENSG00000198851;ENSG00000107485;ENSG00000174123;ENSG00000043462;ENSG00000112062;ENSG00000254087;ENSG00000231389;ENSG00000164342;ENSG00000198821;ENSG00000197943;ENSG00000139178;ENSG00000120690;ENSG00000077150;ENSG00000064012;ENSG00000166278;ENSG00000136869;ENSG00000125730;ENSG00000023445;ENSG00000010671;ENSG00000114423;ENSG00000065675;ENSG00000170458…	74	ENSG00000110057;ENSG00000172578;ENSG00000083799;ENSG00000198851;ENSG00000107485;ENSG00000174123;ENSG00000043462;ENSG00000112062;ENSG00000254087;ENSG00000231389;ENSG00000164342;ENSG00000198821;ENSG00000197943;ENSG00000139178;ENSG00000120690;ENSG00000077150;ENSG00000064012;ENSG00000166278;ENSG00000136869;ENSG00000125730;ENSG00000023445;ENSG00000010671;ENSG00000114423;ENSG00000065675;ENSG00000170458…	73	81622;89857;1540;916;2625;81793;3937;1432;4067;3113;7098;919;5336;51279;1997;4791;841;717;7099;718;330;695;868;5588;929;26191;3055;5199;983;5579;3071;3120;64127;3665;1191;3122;23586;729;917;2;727;9404;5583;640;3662;79132;29108;50852;11326;915;57402;735;10451;1493;64581;5359;7128;3932;3117;974;3426;952;7294;2822;8685;5788;10392;7535;1378;4792;716;64135;3659	73	ENSG00000110057;ENSG00000172578;ENSG00000083799;ENSG00000198851;ENSG00000107485;ENSG00000174123;ENSG00000043462;ENSG00000112062;ENSG00000254087;ENSG00000231389;ENSG00000164342;ENSG00000198821;ENSG00000197943;ENSG00000139178;ENSG00000120690;ENSG00000077150;ENSG00000064012;ENSG00000166278;ENSG00000136869;ENSG00000125730;ENSG00000023445;ENSG00000010671;ENSG00000114423;ENSG00000065675;ENSG00000170458…	74	ENSG00000170345	1	2353	1
biological process	response to chemical stimulus	GO:0042221	437	1.26	1.72e-07	DNAJB4;SLC22A3;RYR1;PYGM;DNAJC3;SLC25A13;AQP1;S100A8;GATA3;IL18;FGG;CCNB1;HAS2;CCNE1;CMTM6;IDO1;IL12A;TGFBR3;MMP7;CTGF;EDEM1;ACSM1;CLDN4;MANF;BOC;SEH1L;SMAD9;COQ7;CAP2;CASP9;KDELR3;HCK;CD36;PON1;SLC8A1;MYH11;GNAI1;RBP4;CD68;HHEX;ENPP1;GGCT;NCKAP1L;FBP1;NOD2;TPM1;DDX58;SCN5A;KLB;ALOX5AP;EGR1;OLR1;CXCR7;SELP;PRKAA1;ADIPOR2;OPHN1;C5;SULF1;NEDD4L;CD27;COL3A1;RAC2;CYR61;CACNB2;PDZK1;BDH1;SFTPB;AQP4;LA…	11080;6581;6261;5837;5611;10165;358;6279;2625;3606;2266;891;3037;898;54918;3620;3592;7049;4316;1490;9695;116285;1364;7873;91653;81929;4093;10229;10486;842;11015;3055;948;5444;6546;4629;2770;5950;968;3087;5167;79017;3071;2203;64127;7168;23586;6331;152831;241;1958;4973;57007;6403;5562;79602;4983;727;23213;23327;939;1281;5880;3491;783;5174;622;6439;361;3913;9961;178;834;3624;2049;9655;10563;9470;155…	ENSG00000162616;ENSG00000146477;ENSG00000196218;ENSG00000068976;ENSG00000102580;ENSG00000004864;ENSG00000240583;ENSG00000143546;ENSG00000107485;ENSG00000150782;ENSG00000171557;ENSG00000134057;ENSG00000170961;ENSG00000105173;ENSG00000091317;ENSG00000131203;ENSG00000168811;ENSG00000069702;ENSG00000137673;ENSG00000118523;ENSG00000134109;ENSG00000166743;ENSG00000189143;ENSG00000145050;ENSG00000144857…	ENSG00000162616;ENSG00000146477;ENSG00000196218;ENSG00000068976;ENSG00000102580;ENSG00000004864;ENSG00000240583;ENSG00000143546;ENSG00000107485;ENSG00000150782;ENSG00000171557;ENSG00000134057;ENSG00000170961;ENSG00000105173;ENSG00000091317;ENSG00000131203;ENSG00000168811;ENSG00000069702;ENSG00000137673;ENSG00000118523;ENSG00000134109;ENSG00000166743;ENSG00000189143;ENSG00000145050;ENSG00000144857…	437	ENSG00000102580;ENSG00000004864;ENSG00000143546;ENSG00000107485;ENSG00000150782;ENSG00000171557;ENSG00000134057;ENSG00000105173;ENSG00000091317;ENSG00000131203;ENSG00000168811;ENSG00000137673;ENSG00000134109;ENSG00000189143;ENSG00000145050;ENSG00000132906;ENSG00000101336;ENSG00000135218;ENSG00000005421;ENSG00000129226;ENSG00000152804;ENSG00000006625;ENSG00000123338;ENSG00000165140;ENSG00000167207…	259	5611;10165;6279;2625;3606;2266;891;898;54918;3620;3592;4316;9695;1364;7873;842;3055;948;5444;968;3087;79017;3071;2203;64127;23586;152831;241;4973;6403;5562;79602;727;23327;939;5880;5174;6439;361;9961;834;10563;9470;1558;4860;1286;6775;3158;10203;971;6809;479;24137;6708;255189;23063;10068;84649;6790;6713;716;1800;245972;55748;3875;7222;5294;5741;3659;21;523;6375;4481;1555;3162;2322;115362;7098;628…	259	ENSG00000162616;ENSG00000146477;ENSG00000196218;ENSG00000068976;ENSG00000102580;ENSG00000004864;ENSG00000240583;ENSG00000143546;ENSG00000107485;ENSG00000150782;ENSG00000171557;ENSG00000134057;ENSG00000170961;ENSG00000105173;ENSG00000091317;ENSG00000131203;ENSG00000168811;ENSG00000069702;ENSG00000137673;ENSG00000118523;ENSG00000134109;ENSG00000166743;ENSG00000189143;ENSG00000145050;ENSG00000144857…	437	ENSG00000162616;ENSG00000146477;ENSG00000196218;ENSG00000068976;ENSG00000240583;ENSG00000170961;ENSG00000069702;ENSG00000118523;ENSG00000166743;ENSG00000144857;ENSG00000085415;ENSG00000120693;ENSG00000167186;ENSG00000112186;ENSG00000100196;ENSG00000183023;ENSG00000133392;ENSG00000127955;ENSG00000138207;ENSG00000197594;ENSG00000140416;ENSG00000183873;ENSG00000134962;ENSG00000120738;ENSG00000144476…	179	11080;6581;6261;5837;358;3037;7049;1490;116285;91653;81929;4093;10229;10486;11015;6546;4629;2770;5950;5167;7168;6331;152831;1958;57007;4983;23213;1281;3491;783;622;3913;178;3624;2049;9655;1429;6262;1374;26355;4781;3931;51422;9982;4929;1278;37;2045;84532;10058;6517;3316;4882;5037;5139;2317;1289;2941;4015;91807;1292;4878;467;7481;9365;5066;1749;7172;57412;57088;8604;2690;4852;84709;7274;10253;496;5…	179
biological process	response to wounding	GO:0009611	201	1.44	3.1e-07	KCNMB1;PTAFR;CCL19;CD40LG;MS4A2;S100A8;GATA3;SCGB1A1;IL18;FGG;KIF2C;CCNB1;IL1A;MAPK14;KIFC1;IDO1;WEE1;PDE1A;CTGF;AOAH;DUSP10;KIF9;TGM2;TLR4;RASGRP1;C3;ITGAL;ABCC4;SELE;TFPI;IL2;HSPA5;VEGFA;HCK;CD36;LIPA;MEFV;CDK1;SLC8A1;GNA14;DPYSL3;GNAI1;CXADR;ITGB2;APOH;HHEX;HPSE;IL8;NOD2;FGF7;VCAM1;CLU;TPM1;AMICA1;SLC7A7;ALOX5AP;SERPINE2;OLR1;SELP;A2M;C5;DOCK11;COL3A1;CD244;ELF3;RAC2;ITGA3;CYR61;NCF1;TGFB3;TPS…	3779;5724;6363;959;2206;6279;2625;7356;3606;2266;11004;891;3552;1432;3833;3620;7465;5136;1490;313;11221;64147;7052;7099;10125;718;3683;10257;6401;7035;3558;3309;7422;3055;948;3988;4210;983;6546;9630;1809;2770;1525;3689;350;3087;10855;3576;64127;2252;7412;1191;7168;120425;9056;241;5270;4973;6403;2;727;139818;1281;51744;1999;5880;3675;3491;653361;7043;8460;5592;3913;89780;735;4602;11057;7130;10563;…	ENSG00000145936;ENSG00000169403;ENSG00000172724;ENSG00000102245;ENSG00000149534;ENSG00000143546;ENSG00000107485;ENSG00000149021;ENSG00000150782;ENSG00000171557;ENSG00000142945;ENSG00000134057;ENSG00000115008;ENSG00000112062;ENSG00000237649;ENSG00000131203;ENSG00000166483;ENSG00000115252;ENSG00000118523;ENSG00000136250;ENSG00000143507;ENSG00000088727;ENSG00000198959;ENSG00000136869;ENSG00000172575…	ENSG00000145936;ENSG00000169403;ENSG00000172724;ENSG00000102245;ENSG00000149534;ENSG00000143546;ENSG00000107485;ENSG00000149021;ENSG00000150782;ENSG00000171557;ENSG00000142945;ENSG00000134057;ENSG00000115008;ENSG00000112062;ENSG00000237649;ENSG00000131203;ENSG00000166483;ENSG00000115252;ENSG00000118523;ENSG00000136250;ENSG00000143507;ENSG00000088727;ENSG00000198959;ENSG00000136869;ENSG00000172575…	201	ENSG00000169403;ENSG00000172724;ENSG00000102245;ENSG00000149534;ENSG00000143546;ENSG00000107485;ENSG00000149021;ENSG00000150782;ENSG00000171557;ENSG00000134057;ENSG00000115008;ENSG00000112062;ENSG00000237649;ENSG00000131203;ENSG00000136250;ENSG00000088727;ENSG00000136869;ENSG00000172575;ENSG00000125730;ENSG00000005844;ENSG00000125257;ENSG00000109471;ENSG00000044574;ENSG00000112715;ENSG00000101336…	143	5724;6363;959;2206;6279;2625;7356;3606;2266;891;3552;1432;3833;3620;313;64147;7099;10125;718;3683;10257;3558;3309;7422;3055;948;4210;983;1525;3689;3087;10855;3576;64127;2252;7412;1191;120425;9056;241;5270;4973;6403;2;727;139818;51744;1999;5880;3675;653361;89780;735;4602;11057;7130;10563;130120;10203;3845;154;29760;5873;5320;24137;1378;961;7222;4843;5294;3659;3600;6375;336;81793;6288;3937;4067;383…	143	ENSG00000145936;ENSG00000169403;ENSG00000172724;ENSG00000102245;ENSG00000149534;ENSG00000143546;ENSG00000107485;ENSG00000149021;ENSG00000150782;ENSG00000171557;ENSG00000142945;ENSG00000134057;ENSG00000115008;ENSG00000112062;ENSG00000237649;ENSG00000131203;ENSG00000166483;ENSG00000115252;ENSG00000118523;ENSG00000136250;ENSG00000143507;ENSG00000088727;ENSG00000198959;ENSG00000136869;ENSG00000172575…	201	ENSG00000145936;ENSG00000142945;ENSG00000166483;ENSG00000115252;ENSG00000118523;ENSG00000143507;ENSG00000198959;ENSG00000007908;ENSG00000003436;ENSG00000107798;ENSG00000183023;ENSG00000156049;ENSG00000113657;ENSG00000127955;ENSG00000091583;ENSG00000140416;ENSG00000168542;ENSG00000142871;ENSG00000119699;ENSG00000169902;ENSG00000185532;ENSG00000172037;ENSG00000162407;ENSG00000038427;ENSG00000124882…	58	3779;11004;7465;5136;1490;11221;7052;6401;7035;3988;6546;9630;1809;2770;350;7168;1281;3491;7043;8460;5592;3913;8613;1462;2069;11127;1278;2982;5037;5460;5139;5582;1289;4620;4015;2191;91807;5068;9365;133;131566;5743;57088;2888;88;9734;6678;50808;7424;23189;2247;3778;2353;185;81029;3685;59272;11216	58
biological process	response to external stimulus	GO:0009605	227	1.4	4.2e-07	PTAFR;SLC22A3;LCN2;PLXNC1;CCL19;CD3E;AQP1;S100A8;GATA3;SCGB1A1;IL18;EXT1;CCNB1;IL1A;MAPK14;CCNE1;CMTM6;IDO1;SFTPC;AOAH;DUSP10;TRPC1;TGM2;MMP13;TLR4;BOC;WDR45;C3;MEIS2;COL4A3;CAP2;SELE;IL2;HSPA5;EZR;VEGFA;HCK;CD36;MEFV;CDK1;PON1;SLC8A1;EGR2;DPYSL3;MYH11;CXADR;ITGB2;RBP4;CXCL5;APOH;LEF1;HPSE;NCKAP1L;WIPI1;KYNU;IL8;NOD2;FGF7;PTK2B;VCAM1;ROCK1;CLN3;MT3;AMICA1;CHRNA9;SERPINE2;SELP;GLRB;A2M;PRKAA1;OPHN…	5724;6581;3934;10154;6363;916;358;6279;2625;7356;3606;2131;891;3552;1432;898;54918;3620;6440;313;11221;7220;7052;4322;7099;91653;11152;718;4212;1285;10486;6401;3558;3309;7430;7422;3055;948;4210;983;5444;6546;1959;1809;4629;1525;3689;5950;6374;350;51176;10855;3071;55062;8942;3576;64127;2252;2185;7412;6093;1201;4504;120425;55584;5270;6403;2743;2;5562;4983;3171;727;1111;6304;1281;25981;5146;5880;195…	ENSG00000169403;ENSG00000146477;ENSG00000148346;ENSG00000136040;ENSG00000172724;ENSG00000198851;ENSG00000240583;ENSG00000143546;ENSG00000107485;ENSG00000149021;ENSG00000150782;ENSG00000182197;ENSG00000134057;ENSG00000115008;ENSG00000112062;ENSG00000105173;ENSG00000091317;ENSG00000131203;ENSG00000168484;ENSG00000136250;ENSG00000143507;ENSG00000144935;ENSG00000198959;ENSG00000137745;ENSG00000136869…	ENSG00000169403;ENSG00000146477;ENSG00000148346;ENSG00000136040;ENSG00000172724;ENSG00000198851;ENSG00000240583;ENSG00000143546;ENSG00000107485;ENSG00000149021;ENSG00000150782;ENSG00000182197;ENSG00000134057;ENSG00000115008;ENSG00000112062;ENSG00000105173;ENSG00000091317;ENSG00000131203;ENSG00000168484;ENSG00000136250;ENSG00000143507;ENSG00000144935;ENSG00000198959;ENSG00000137745;ENSG00000136869…	227	ENSG00000169403;ENSG00000148346;ENSG00000136040;ENSG00000172724;ENSG00000198851;ENSG00000143546;ENSG00000107485;ENSG00000149021;ENSG00000150782;ENSG00000134057;ENSG00000115008;ENSG00000112062;ENSG00000105173;ENSG00000091317;ENSG00000131203;ENSG00000168484;ENSG00000136250;ENSG00000137745;ENSG00000136869;ENSG00000125730;ENSG00000169031;ENSG00000109471;ENSG00000044574;ENSG00000092820;ENSG00000112715…	144	5724;3934;10154;6363;916;6279;2625;7356;3606;891;3552;1432;898;54918;3620;6440;313;4322;7099;718;1285;3558;3309;7430;7422;3055;948;4210;983;5444;1525;3689;6374;51176;10855;3071;8942;3576;64127;2252;2185;7412;1201;120425;55584;5270;6403;2;5562;3171;727;1111;6304;25981;5146;5880;195814;6439;89780;834;10563;1286;3158;10203;3845;952;971;154;5320;24137;6708;1378;961;7222;5294;3659;3600;6375;6288;3162;…	144	ENSG00000169403;ENSG00000146477;ENSG00000148346;ENSG00000136040;ENSG00000172724;ENSG00000198851;ENSG00000240583;ENSG00000143546;ENSG00000107485;ENSG00000149021;ENSG00000150782;ENSG00000182197;ENSG00000134057;ENSG00000115008;ENSG00000112062;ENSG00000105173;ENSG00000091317;ENSG00000131203;ENSG00000168484;ENSG00000136250;ENSG00000143507;ENSG00000144935;ENSG00000198959;ENSG00000137745;ENSG00000136869…	227	ENSG00000146477;ENSG00000240583;ENSG00000182197;ENSG00000143507;ENSG00000144935;ENSG00000198959;ENSG00000144857;ENSG00000196998;ENSG00000134138;ENSG00000112186;ENSG00000007908;ENSG00000183023;ENSG00000122877;ENSG00000113657;ENSG00000133392;ENSG00000138207;ENSG00000091583;ENSG00000070540;ENSG00000067900;ENSG00000087250;ENSG00000109738;ENSG00000079482;ENSG00000168542;ENSG00000129170;ENSG00000142871…	83	6581;358;2131;11221;7220;7052;91653;11152;4212;10486;6401;6546;1959;1809;4629;5950;350;55062;6093;4504;2743;4983;1281;8048;3491;783;622;1291;5592;3913;4040;93649;178;2049;56896;4781;4929;1278;5337;2045;5365;5009;6785;51119;1289;8557;27063;2191;1292;1290;7832;7481;133;5743;8854;1749;1272;322;148738;93986;6678;2690;4852;7274;1843;7424;1373;2247;3164;3623;583;2353;782;185;1647;81029;8013;6259;5311;3…	83
biological process	response to bacterium	GO:0009617	74	1.88	4.37e-07	LCN2;S100A8;IL18;IL1A;MAPK14;ARG1;LYN;IDO1;ABCC8;IL12A;AQP2;JAG1;MMP7;TLR3;PLCG2;SFTPC;DUSP10;TAC1;CASP8;ANKRD1;TLR4;IL23R;ABCC5;DEFA4;SELE;PGLYRP1;PTGER4;CD14;CAMP;HCK;CD36;CFP;ADM;MGST1;CXCL10;PTGS2;IL8;STAT1;NOD2;ABCA1;PLSCR4;SELP;CX3CR1;LYZ;B2M;TNFSF8;HLA-A;SPARC;PYCARD;NCF1;SFTPB;S100A14;CASP1;S100A9;ATP4B;TNF;CXCL13;CPS1;TNFAIP3;KCNJ8;HMGCS2;FOS;PLA2G2A;HLA-B;NOD1;NFKBIA;IL18BP;CD47;ERAP1;H…	3934;6279;3606;3552;1432;383;4067;3620;6833;3592;359;182;4316;7098;5336;6440;11221;6863;841;27063;7099;149233;10057;1669;6401;8993;5734;929;820;3055;948;5199;133;4257;3627;5743;3576;6772;64127;19;57088;6403;1524;4069;567;944;3105;6678;29108;653361;6439;57402;834;6280;496;7124;10563;1373;7128;3764;3158;2353;5320;3106;10392;4792;10068;961;51752;3148;5337;1118;4843;2876	ENSG00000148346;ENSG00000143546;ENSG00000150782;ENSG00000115008;ENSG00000112062;ENSG00000118520;ENSG00000254087;ENSG00000131203;ENSG00000006071;ENSG00000168811;ENSG00000167580;ENSG00000101384;ENSG00000137673;ENSG00000164342;ENSG00000197943;ENSG00000168484;ENSG00000143507;ENSG00000006128;ENSG00000064012;ENSG00000148677;ENSG00000136869;ENSG00000162594;ENSG00000114770;ENSG00000164821;ENSG00000007908…	ENSG00000148346;ENSG00000143546;ENSG00000150782;ENSG00000115008;ENSG00000112062;ENSG00000118520;ENSG00000254087;ENSG00000131203;ENSG00000006071;ENSG00000168811;ENSG00000167580;ENSG00000101384;ENSG00000137673;ENSG00000164342;ENSG00000197943;ENSG00000168484;ENSG00000143507;ENSG00000006128;ENSG00000064012;ENSG00000148677;ENSG00000136869;ENSG00000162594;ENSG00000114770;ENSG00000164821;ENSG00000007908…	74	ENSG00000148346;ENSG00000143546;ENSG00000150782;ENSG00000115008;ENSG00000112062;ENSG00000118520;ENSG00000254087;ENSG00000131203;ENSG00000168811;ENSG00000167580;ENSG00000137673;ENSG00000164342;ENSG00000197943;ENSG00000168484;ENSG00000006128;ENSG00000064012;ENSG00000136869;ENSG00000162594;ENSG00000164821;ENSG00000008438;ENSG00000171522;ENSG00000170458;ENSG00000164047;ENSG00000101336;ENSG00000135218…	59	3934;6279;3606;3552;1432;383;4067;3620;3592;359;4316;7098;5336;6440;6863;841;7099;149233;1669;8993;5734;929;820;3055;948;5199;4257;3627;3576;6772;64127;19;6403;1524;4069;567;944;3105;29108;653361;6439;57402;834;6280;7124;10563;7128;3158;5320;3106;10392;4792;10068;961;51752;3148;1118;4843;2876	59	ENSG00000148346;ENSG00000143546;ENSG00000150782;ENSG00000115008;ENSG00000112062;ENSG00000118520;ENSG00000254087;ENSG00000131203;ENSG00000006071;ENSG00000168811;ENSG00000167580;ENSG00000101384;ENSG00000137673;ENSG00000164342;ENSG00000197943;ENSG00000168484;ENSG00000143507;ENSG00000006128;ENSG00000064012;ENSG00000148677;ENSG00000136869;ENSG00000162594;ENSG00000114770;ENSG00000164821;ENSG00000007908…	74	ENSG00000006071;ENSG00000101384;ENSG00000143507;ENSG00000148677;ENSG00000114770;ENSG00000007908;ENSG00000148926;ENSG00000073756;ENSG00000114698;ENSG00000113140;ENSG00000186009;ENSG00000021826;ENSG00000121361;ENSG00000170345;ENSG00000075651	15	6833;182;11221;27063;10057;6401;133;5743;57088;6678;496;1373;3764;2353;5337	15
biological process	lymphocyte activation	GO:0046649	101	1.7	4.99e-07	CCL19;IL15;CD40LG;CD3E;XCL1;SLAMF7;GATA3;SCGB1A1;IL18;FLT3;LYN;DOCK2;CD5;IDO1;HLA-DPA1;IL12A;LAG3;CD247;PLCG2;RICTOR;CORO1A;TAC1;TLR4;IL23R;SAMSN1;ITGAL;SKAP2;BTK;PGLYRP1;IL2;CBLB;PTGER4;PRKCQ;PTPN22;CRTAM;MS4A1;LCP1;EXO1;HHEX;LEF1;IKZF3;PRKCB;NCKAP1L;HLA-DQB2;NOD2;PTK2B;DPP4;VCAM1;HLA-DRA;SHB;RUNX2;MINK1;EGR1;CD3G;TNFSF13B;B2M;TNFSF8;CD27;SATB1;SPINK5;ICOS;SRC;EFNB1;CD2;HDAC9;IRF4;PYCARD;VSIG4;C…	6363;3600;959;916;6375;57823;2625;7356;3606;2322;4067;1794;921;3620;3113;3592;3902;919;5336;253260;11151;6863;7099;149233;64092;3683;8935;695;8993;3558;868;5734;5588;26191;56253;931;3936;9156;3087;51176;22806;5579;3071;3120;64127;2185;1803;7412;3122;6461;860;50488;1958;917;10673;567;944;939;6304;11005;29851;6714;1947;914;9734;3662;29108;11326;915;89780;3624;4602;9655;80329;10451;962;1493;64581;71…	ENSG00000172724;ENSG00000164136;ENSG00000102245;ENSG00000198851;ENSG00000143184;ENSG00000026751;ENSG00000107485;ENSG00000149021;ENSG00000150782;ENSG00000122025;ENSG00000254087;ENSG00000134516;ENSG00000110448;ENSG00000131203;ENSG00000231389;ENSG00000168811;ENSG00000089692;ENSG00000198821;ENSG00000197943;ENSG00000164327;ENSG00000102879;ENSG00000006128;ENSG00000136869;ENSG00000162594;ENSG00000155307…	ENSG00000172724;ENSG00000164136;ENSG00000102245;ENSG00000198851;ENSG00000143184;ENSG00000026751;ENSG00000107485;ENSG00000149021;ENSG00000150782;ENSG00000122025;ENSG00000254087;ENSG00000134516;ENSG00000110448;ENSG00000131203;ENSG00000231389;ENSG00000168811;ENSG00000089692;ENSG00000198821;ENSG00000197943;ENSG00000164327;ENSG00000102879;ENSG00000006128;ENSG00000136869;ENSG00000162594;ENSG00000155307…	101	ENSG00000172724;ENSG00000164136;ENSG00000102245;ENSG00000198851;ENSG00000143184;ENSG00000026751;ENSG00000107485;ENSG00000149021;ENSG00000150782;ENSG00000122025;ENSG00000254087;ENSG00000134516;ENSG00000110448;ENSG00000131203;ENSG00000231389;ENSG00000168811;ENSG00000089692;ENSG00000198821;ENSG00000197943;ENSG00000164327;ENSG00000102879;ENSG00000006128;ENSG00000136869;ENSG00000162594;ENSG00000155307…	94	6363;3600;959;916;6375;57823;2625;7356;3606;2322;4067;1794;921;3620;3113;3592;3902;919;5336;253260;11151;6863;7099;149233;64092;3683;8935;695;8993;3558;868;5734;5588;26191;56253;931;3936;9156;3087;51176;22806;5579;3071;3120;64127;2185;7412;3122;6461;860;50488;917;10673;567;944;939;6304;29851;6714;1947;914;3662;29108;11326;915;89780;4602;80329;10451;962;1493;64581;7128;4860;3932;3117;3676;729230;9…	94	ENSG00000172724;ENSG00000164136;ENSG00000102245;ENSG00000198851;ENSG00000143184;ENSG00000026751;ENSG00000107485;ENSG00000149021;ENSG00000150782;ENSG00000122025;ENSG00000254087;ENSG00000134516;ENSG00000110448;ENSG00000131203;ENSG00000231389;ENSG00000168811;ENSG00000089692;ENSG00000198821;ENSG00000197943;ENSG00000164327;ENSG00000102879;ENSG00000006128;ENSG00000136869;ENSG00000162594;ENSG00000155307…	101	ENSG00000197635;ENSG00000120738;ENSG00000133710;ENSG00000048052;ENSG00000122641;ENSG00000171150;ENSG00000123999	7	1803;1958;11005;9734;3624;9655;3623	7
biological process	multicellular organismal development	GO:0007275	588	1.2	5.82e-07	ADAM19;MREG;RYR1;CD40LG;RECK;NPHS2;AQP1;IL18;HAS2;CCNE1;WEE1;TGFBR3;ZFHX3;PSD;CPE;BOC;MEIS2;SMAD9;MDGA1;GJB2;CAP2;PIWIL4;BTK;PTPLA;HLA-DMB;DCT;CD36;TRIML1;LCP1;ASB4;MYH11;RBP4;APOH;ENPP1;HEMGN;TPM1;TNNC1;SCN5A;STOX2;CXCR7;SELP;GLRB;TJP1;GPSM2;ITGB5;MIP;ELF3;SYCP2;CSRP3;RAC2;PDE6C;OBSL1;CACNB2;SFTPB;LAMB2;CASP1;INHBA;PAQR7;MYB;PNP;HMGCS2;CALCRL;RYR2;FBN2;GCNT4;PLN;SOSTDC1;DGAT2;C1S;COL1A2;PITX3;TR…	8728;55686;6261;959;8434;7827;358;3606;3037;898;7465;7049;463;5662;1363;91653;4212;4093;266727;2706;10486;143689;695;9200;3109;1638;948;339976;3936;51666;4629;5950;350;5167;55363;7168;7134;6331;56977;57007;6403;2743;7082;29899;3693;4284;1999;10388;8048;5880;5146;23363;783;6439;3913;834;3624;164091;4602;4860;3158;10203;6262;2201;51301;5350;25928;84649;716;1278;5309;7222;1000;2045;1381;5294;5741;14…	ENSG00000135074;ENSG00000118242;ENSG00000196218;ENSG00000102245;ENSG00000122707;ENSG00000116218;ENSG00000240583;ENSG00000150782;ENSG00000170961;ENSG00000105173;ENSG00000166483;ENSG00000069702;ENSG00000140836;ENSG00000059915;ENSG00000109472;ENSG00000144857;ENSG00000134138;ENSG00000120693;ENSG00000112139;ENSG00000165474;ENSG00000112186;ENSG00000134627;ENSG00000010671;ENSG00000165996;ENSG00000242574…	ENSG00000135074;ENSG00000118242;ENSG00000196218;ENSG00000102245;ENSG00000122707;ENSG00000116218;ENSG00000240583;ENSG00000150782;ENSG00000170961;ENSG00000105173;ENSG00000166483;ENSG00000069702;ENSG00000140836;ENSG00000059915;ENSG00000109472;ENSG00000144857;ENSG00000134138;ENSG00000120693;ENSG00000112139;ENSG00000165474;ENSG00000112186;ENSG00000134627;ENSG00000010671;ENSG00000165996;ENSG00000242574…	588	ENSG00000118242;ENSG00000102245;ENSG00000150782;ENSG00000105173;ENSG00000165474;ENSG00000134627;ENSG00000010671;ENSG00000242574;ENSG00000135218;ENSG00000136167;ENSG00000005981;ENSG00000136929;ENSG00000174175;ENSG00000163435;ENSG00000196074;ENSG00000128340;ENSG00000095464;ENSG00000168878;ENSG00000137752;ENSG00000182749;ENSG00000118513;ENSG00000198805;ENSG00000134240;ENSG00000064989;ENSG00000138829…	305	55686;959;3606;898;2706;143689;695;3109;948;3936;51666;55363;6403;1999;10388;5880;5146;6439;834;164091;4602;4860;3158;10203;2201;25928;84649;716;7222;1381;5294;5741;2054;8796;1555;3162;3925;2705;7098;219790;253260;3872;8993;3627;26298;5729;29927;3176;4036;567;2113;1580;914;2937;2146;8879;5787;2719;7128;3676;168002;5140;25861;1576;7294;5788;694;3860;81930;8842;5426;3148;3112;916;344758;51299;3552;…	305	ENSG00000135074;ENSG00000118242;ENSG00000196218;ENSG00000102245;ENSG00000122707;ENSG00000116218;ENSG00000240583;ENSG00000150782;ENSG00000170961;ENSG00000105173;ENSG00000166483;ENSG00000069702;ENSG00000140836;ENSG00000059915;ENSG00000109472;ENSG00000144857;ENSG00000134138;ENSG00000120693;ENSG00000112139;ENSG00000165474;ENSG00000112186;ENSG00000134627;ENSG00000010671;ENSG00000165996;ENSG00000242574…	588	ENSG00000135074;ENSG00000196218;ENSG00000122707;ENSG00000116218;ENSG00000240583;ENSG00000170961;ENSG00000166483;ENSG00000069702;ENSG00000140836;ENSG00000059915;ENSG00000109472;ENSG00000144857;ENSG00000134138;ENSG00000120693;ENSG00000112139;ENSG00000112186;ENSG00000165996;ENSG00000080166;ENSG00000184108;ENSG00000133392;ENSG00000138207;ENSG00000091583;ENSG00000197594;ENSG00000140416;ENSG00000114854…	283	8728;6261;8434;7827;358;3037;7465;7049;463;5662;1363;91653;4212;4093;266727;10486;9200;1638;339976;4629;5950;350;5167;7168;7134;6331;56977;57007;2743;7082;29899;3693;4284;8048;23363;783;3913;3624;6262;51301;5350;1278;5309;1000;2045;1466;6910;10058;4921;6444;9362;5954;51339;80114;4015;54961;91807;1292;6594;7481;27295;25937;5066;348980;27286;8100;3696;2690;55553;5694;7424;23189;57493;54360;6424;810…	283
biological process	cellular response to stimulus	GO:0051716	721	1.17	5.95e-07	P2RY4;RYR1;DNAJC3;AQP1;CCNO;PKIG;IL18;FGG;HAS2;CCNE1;TGFBR3;UBE2T;EDEM1;PSD;RAB33A;MOB1A;CPE;BOC;RHOBTB3;RAD1;SMAD9;RSPO1;CAP2;BTK;PTPLA;AKAP12;KDELR3;TNFSF10;CD36;TRIM63;ASB4;CD68;ENPP1;FBP1;NOD2;TPM1;SCN5A;KLB;SHC4;CLSPN;CXCR7;SELP;GLRB;CD3G;SP110;TJP1;GPSM2;ITGB5;APH1B;TJP2;RAC2;PDE6C;SFTPB;LAMB2;ST8SIA1;CASP1;INHBA;EIF4E2;CRYZ;STAT4;HMGCS2;CALCRL;RYR2;FBN2;ROS1;RAB27A;SOSTDC1;PLA2G4F;RAD51;FG…	5030;6261;5611;358;10309;11142;3606;2266;3037;898;7049;29089;9695;5662;9363;55233;1363;91653;22836;5810;4093;284654;10486;695;9200;9590;11015;8743;948;84676;51666;968;5167;2203;64127;7168;6331;152831;399694;63967;57007;6403;2743;917;3431;7082;29899;3693;83464;9414;5880;5146;6439;3913;6489;834;3624;9470;1429;6775;3158;10203;6262;2201;6098;5873;25928;255189;5888;9982;84649;6790;245972;1278;7222;845…	ENSG00000186912;ENSG00000196218;ENSG00000102580;ENSG00000240583;ENSG00000152669;ENSG00000168734;ENSG00000150782;ENSG00000171557;ENSG00000170961;ENSG00000105173;ENSG00000069702;ENSG00000077152;ENSG00000134109;ENSG00000059915;ENSG00000134594;ENSG00000114978;ENSG00000109472;ENSG00000144857;ENSG00000164292;ENSG00000113456;ENSG00000120693;ENSG00000169218;ENSG00000112186;ENSG00000010671;ENSG00000165996…	ENSG00000186912;ENSG00000196218;ENSG00000102580;ENSG00000240583;ENSG00000152669;ENSG00000168734;ENSG00000150782;ENSG00000171557;ENSG00000170961;ENSG00000105173;ENSG00000069702;ENSG00000077152;ENSG00000134109;ENSG00000059915;ENSG00000134594;ENSG00000114978;ENSG00000109472;ENSG00000144857;ENSG00000164292;ENSG00000113456;ENSG00000120693;ENSG00000169218;ENSG00000112186;ENSG00000010671;ENSG00000165996…	721	ENSG00000186912;ENSG00000102580;ENSG00000152669;ENSG00000150782;ENSG00000171557;ENSG00000105173;ENSG00000077152;ENSG00000134109;ENSG00000114978;ENSG00000113456;ENSG00000169218;ENSG00000010671;ENSG00000121858;ENSG00000135218;ENSG00000005981;ENSG00000129226;ENSG00000165140;ENSG00000167207;ENSG00000134962;ENSG00000092853;ENSG00000174175;ENSG00000160654;ENSG00000135899;ENSG00000138613;ENSG00000119139…	432	5030;5611;10309;3606;2266;898;29089;9695;55233;5810;284654;695;8743;948;51666;968;2203;64127;152831;63967;6403;917;3431;83464;9414;5880;5146;6439;6489;834;9470;6775;3158;10203;2201;6098;5873;25928;255189;5888;84649;6790;245972;7222;1381;5294;5741;9824;2054;523;6375;8601;1555;3937;3162;3925;7098;219790;253260;6863;3872;8085;3627;5729;129293;84142;567;2113;1580;914;9404;2937;2146;8879;79132;51512;2…	432	ENSG00000186912;ENSG00000196218;ENSG00000102580;ENSG00000240583;ENSG00000152669;ENSG00000168734;ENSG00000150782;ENSG00000171557;ENSG00000170961;ENSG00000105173;ENSG00000069702;ENSG00000077152;ENSG00000134109;ENSG00000059915;ENSG00000134594;ENSG00000114978;ENSG00000109472;ENSG00000144857;ENSG00000164292;ENSG00000113456;ENSG00000120693;ENSG00000169218;ENSG00000112186;ENSG00000010671;ENSG00000165996…	721	ENSG00000196218;ENSG00000240583;ENSG00000168734;ENSG00000170961;ENSG00000069702;ENSG00000059915;ENSG00000134594;ENSG00000109472;ENSG00000144857;ENSG00000164292;ENSG00000120693;ENSG00000112186;ENSG00000165996;ENSG00000131016;ENSG00000100196;ENSG00000158022;ENSG00000197594;ENSG00000140416;ENSG00000183873;ENSG00000134962;ENSG00000185634;ENSG00000144476;ENSG00000109738;ENSG00000104067;ENSG00000121957…	290	6261;358;11142;3037;7049;5662;9363;1363;91653;22836;4093;10486;9200;9590;11015;84676;5167;7168;6331;152831;399694;57007;2743;7082;29899;3693;3913;3624;1429;6262;9982;1278;84532;1000;2045;79658;4921;23011;65266;8611;51339;5149;80114;2941;80254;57514;91807;7481;25937;51495;9966;7172;27314;55701;8100;3696;2690;55553;5694;7424;23189;8471;54360;6424;5352;81029;2775;27122;8013;8404;3685;130497;55811;72…	290
biological process	adaptive immune response	GO:0002250	54	2.1	6.01e-07	KLHL6;CCL19;CD40LG;C6;XCL1;TAP1;TNFSF13B;GATA3;C5;B2M;IL18;CD27;IL12A;CTSS;CTSC;PYCARD;C1RL;DUSP10;NFKB2;C2;TLR4;IL23R;CTSH;SAMSN1;C9;SOCS5;TNF;C3;CXCL13;TNFAIP3;CFI;BTK;IL2;CCR2;PRKCQ;VEGFA;CRTAM;CD74;RAB27A;TXK;PTPRC;EXO1;SWAP70;LEF1;ZAP70;CR1;IL18BP;NOD2;DPP4;C1S;IRF7;CLU;PIK3CG;IRF1	89857;6363;959;729;6375;6890;10673;2625;727;567;3606;939;3592;1520;1075;29108;51279;11221;4791;717;7099;149233;1512;64092;735;9655;7124;718;10563;7128;3426;695;3558;729230;5588;7422;56253;972;5873;7294;5788;9156;23075;51176;7535;1378;10068;64127;1803;716;3665;1191;5294;3659	ENSG00000172578;ENSG00000172724;ENSG00000102245;ENSG00000039537;ENSG00000143184;ENSG00000168394;ENSG00000102524;ENSG00000107485;ENSG00000106804;ENSG00000166710;ENSG00000150782;ENSG00000139193;ENSG00000168811;ENSG00000163131;ENSG00000109861;ENSG00000103490;ENSG00000139178;ENSG00000143507;ENSG00000077150;ENSG00000166278;ENSG00000136869;ENSG00000162594;ENSG00000103811;ENSG00000155307;ENSG00000113600…	ENSG00000172578;ENSG00000172724;ENSG00000102245;ENSG00000039537;ENSG00000143184;ENSG00000168394;ENSG00000102524;ENSG00000107485;ENSG00000106804;ENSG00000166710;ENSG00000150782;ENSG00000139193;ENSG00000168811;ENSG00000163131;ENSG00000109861;ENSG00000103490;ENSG00000139178;ENSG00000143507;ENSG00000077150;ENSG00000166278;ENSG00000136869;ENSG00000162594;ENSG00000103811;ENSG00000155307;ENSG00000113600…	54	ENSG00000172578;ENSG00000172724;ENSG00000102245;ENSG00000039537;ENSG00000143184;ENSG00000168394;ENSG00000102524;ENSG00000107485;ENSG00000106804;ENSG00000166710;ENSG00000150782;ENSG00000139193;ENSG00000168811;ENSG00000163131;ENSG00000109861;ENSG00000103490;ENSG00000139178;ENSG00000077150;ENSG00000166278;ENSG00000136869;ENSG00000162594;ENSG00000103811;ENSG00000155307;ENSG00000113600;ENSG00000232810…	51	89857;6363;959;729;6375;6890;10673;2625;727;567;3606;939;3592;1520;1075;29108;51279;4791;717;7099;149233;1512;64092;735;7124;718;10563;7128;3426;695;3558;729230;5588;7422;56253;972;5873;7294;5788;9156;23075;51176;7535;1378;10068;64127;716;3665;1191;5294;3659	51	ENSG00000172578;ENSG00000172724;ENSG00000102245;ENSG00000039537;ENSG00000143184;ENSG00000168394;ENSG00000102524;ENSG00000107485;ENSG00000106804;ENSG00000166710;ENSG00000150782;ENSG00000139193;ENSG00000168811;ENSG00000163131;ENSG00000109861;ENSG00000103490;ENSG00000139178;ENSG00000143507;ENSG00000077150;ENSG00000166278;ENSG00000136869;ENSG00000162594;ENSG00000103811;ENSG00000155307;ENSG00000113600…	54	ENSG00000143507;ENSG00000171150;ENSG00000197635	3	11221;9655;1803	3
biological process	positive regulation of response to stimulus	GO:0048584	198	1.43	6.11e-07	UNC93B1;CCL19;CD40LG;CD3E;TAP1;LMCD1;S100A8;GATA3;IL18;SEPT4;IL1A;MAPK14;IDO1;HLA-DPA1;IL12A;SH2D1A;TGFBR3;CTGF;DLL1;CD247;C1RL;TGM2;TLR4;C3;ITGAL;RSPO1;IL2;BTK;CBLB;AKAP12;TNFSF10;VEGFA;HCK;CD36;CDK1;HHEX;HPSE;NCKAP1L;BAMBI;IL8;NOD2;PTK2B;CLU;MT3;HLA-DRA;DDX58;KLB;SELP;C6;A2M;CD3G;LAMTOR3;SULF1;C5;CD27;KIAA1161;BMPER;DAB2;STK3;CYR61;PYCARD;TTK;TGFB3;TRAT1;LRP6;CD3D;NPTN;WNT3A;MYOCD;CASP1;INHBA;C…	81622;6363;959;916;6890;29995;6279;2625;3606;5414;3552;1432;3620;3113;3592;4068;7049;1490;28514;919;51279;7052;7099;718;3683;284654;3558;695;868;9590;8743;7422;3055;948;983;3087;10855;3071;25805;3576;64127;2185;1191;4504;3122;23586;152831;6403;729;2;917;8649;23213;727;939;57462;168667;1601;6788;3491;29108;7272;7043;50852;4040;915;27020;89780;93649;834;3624;735;2264;1493;10563;974;3845;952;154;532…	ENSG00000110057;ENSG00000172724;ENSG00000102245;ENSG00000198851;ENSG00000168394;ENSG00000071282;ENSG00000143546;ENSG00000107485;ENSG00000150782;ENSG00000108387;ENSG00000115008;ENSG00000112062;ENSG00000131203;ENSG00000231389;ENSG00000168811;ENSG00000183918;ENSG00000069702;ENSG00000118523;ENSG00000198719;ENSG00000198821;ENSG00000139178;ENSG00000198959;ENSG00000136869;ENSG00000125730;ENSG00000005844…	ENSG00000110057;ENSG00000172724;ENSG00000102245;ENSG00000198851;ENSG00000168394;ENSG00000071282;ENSG00000143546;ENSG00000107485;ENSG00000150782;ENSG00000108387;ENSG00000115008;ENSG00000112062;ENSG00000131203;ENSG00000231389;ENSG00000168811;ENSG00000183918;ENSG00000069702;ENSG00000118523;ENSG00000198719;ENSG00000198821;ENSG00000139178;ENSG00000198959;ENSG00000136869;ENSG00000125730;ENSG00000005844…	198	ENSG00000110057;ENSG00000172724;ENSG00000102245;ENSG00000198851;ENSG00000168394;ENSG00000143546;ENSG00000107485;ENSG00000150782;ENSG00000108387;ENSG00000115008;ENSG00000112062;ENSG00000131203;ENSG00000231389;ENSG00000168811;ENSG00000183918;ENSG00000198719;ENSG00000198821;ENSG00000139178;ENSG00000136869;ENSG00000125730;ENSG00000005844;ENSG00000169218;ENSG00000109471;ENSG00000010671;ENSG00000114423…	145	81622;6363;959;916;6890;6279;2625;3606;5414;3552;1432;3620;3113;3592;4068;28514;919;51279;7099;718;3683;284654;3558;695;868;8743;7422;3055;948;983;3087;10855;3071;3576;64127;2185;1191;3122;23586;152831;6403;729;2;917;8649;727;939;168667;29108;7272;50852;915;89780;834;735;2264;1493;10563;974;3845;952;154;5320;1378;4792;961;716;64135;5294;5741;3659;89857;1540;3600;6375;81793;3937;4067;2322;3162;202…	145	ENSG00000110057;ENSG00000172724;ENSG00000102245;ENSG00000198851;ENSG00000168394;ENSG00000071282;ENSG00000143546;ENSG00000107485;ENSG00000150782;ENSG00000108387;ENSG00000115008;ENSG00000112062;ENSG00000131203;ENSG00000231389;ENSG00000168811;ENSG00000183918;ENSG00000069702;ENSG00000118523;ENSG00000198719;ENSG00000198821;ENSG00000139178;ENSG00000198959;ENSG00000136869;ENSG00000125730;ENSG00000005844…	198	ENSG00000071282;ENSG00000069702;ENSG00000118523;ENSG00000198959;ENSG00000131016;ENSG00000095739;ENSG00000087250;ENSG00000134962;ENSG00000137573;ENSG00000164976;ENSG00000153071;ENSG00000104375;ENSG00000142871;ENSG00000119699;ENSG00000070018;ENSG00000156642;ENSG00000141052;ENSG00000122641;ENSG00000155011;ENSG00000137440;ENSG00000162407;ENSG00000124882;ENSG00000170558;ENSG00000091831;ENSG00000089220…	54	29995;7049;1490;7052;9590;25805;4504;152831;23213;57462;1601;6788;3491;7043;4040;27020;93649;3624;27123;9982;8613;2069;1000;2099;5037;9464;5460;182;5582;51339;5149;92;27063;7481;9365;5743;1749;65018;322;5523;2690;4852;23090;10253;7424;23189;2247;2353;185;143098;57045;6424;6259;5311	54
biological process	circulatory system development	GO:0072359	156	1.5	8.72e-07	ADAM19;HSPG2;RYR1;RECK;MFGE8;AQP1;GATA3;IL18;ADAMTS1;CCNB1;IL1A;MAPK14;PCNA;TGFBR3;CTGF;DLL1;CPE;TXNRD2;SRPK2;LAMA4;C3;COL4A3;VEGFA;CDK1;SLC8A1;ASB4;MYH11;CXADR;RBP4;APOH;HHEX;LEF1;HPSE;CCBE1;IL8;COL15A1;LECT1;PTK2B;VCAM1;ROCK1;TPM1;SHB;TNNC1;SCN5A;EGR1;SELP;COL8A1;SULF1;C5;SPINK5;COL3A1;BMPER;CSRP3;OBSL1;STK3;CYR61;LRP6;TSPAN12;WNT3A;MYOCD;EPHB3;ATPIF1;MYH7;CXCL13;NSDHL;CALCRL;RYR2;SPINT1;MYBPC3…	8728;3339;6261;8434;4240;358;2625;3606;9510;891;3552;1432;5111;7049;1490;28514;1363;10587;6733;3910;718;1285;7422;983;6546;51666;4629;1525;5950;350;3087;51176;10855;147372;3576;1306;11061;2185;7412;6093;7168;6461;7134;6331;1958;6403;1295;23213;727;11005;1281;168667;8048;23363;6788;3491;4040;23554;89780;93649;2049;93974;4625;10563;50814;10203;6262;6692;4607;5350;577;8613;1462;2069;11127;7139;1278;…	ENSG00000135074;ENSG00000142798;ENSG00000196218;ENSG00000122707;ENSG00000140545;ENSG00000240583;ENSG00000107485;ENSG00000150782;ENSG00000154734;ENSG00000134057;ENSG00000115008;ENSG00000112062;ENSG00000132646;ENSG00000069702;ENSG00000118523;ENSG00000198719;ENSG00000109472;ENSG00000184470;ENSG00000135250;ENSG00000112769;ENSG00000125730;ENSG00000169031;ENSG00000112715;ENSG00000170312;ENSG00000183023…	ENSG00000135074;ENSG00000142798;ENSG00000196218;ENSG00000122707;ENSG00000140545;ENSG00000240583;ENSG00000107485;ENSG00000150782;ENSG00000154734;ENSG00000134057;ENSG00000115008;ENSG00000112062;ENSG00000132646;ENSG00000069702;ENSG00000118523;ENSG00000198719;ENSG00000109472;ENSG00000184470;ENSG00000135250;ENSG00000112769;ENSG00000125730;ENSG00000169031;ENSG00000112715;ENSG00000170312;ENSG00000183023…	156	ENSG00000107485;ENSG00000150782;ENSG00000134057;ENSG00000115008;ENSG00000112062;ENSG00000132646;ENSG00000198719;ENSG00000125730;ENSG00000169031;ENSG00000112715;ENSG00000170312;ENSG00000005981;ENSG00000154639;ENSG00000152804;ENSG00000138795;ENSG00000173083;ENSG00000183287;ENSG00000169429;ENSG00000120899;ENSG00000162692;ENSG00000107338;ENSG00000174175;ENSG00000106804;ENSG00000164619;ENSG00000106025…	64	2625;3606;891;3552;1432;5111;28514;718;1285;7422;983;51666;1525;3087;51176;10855;147372;3576;2185;7412;6461;6403;727;168667;23554;89780;10563;50814;10203;6692;577;5294;10163;2028;6491;3162;2022;841;6423;7453;3627;5579;6772;688;1524;9723;2113;8879;5787;655;7020;1512;27035;10451;7128;3676;729230;5140;2822;694;7852;51752;2876;196	64	ENSG00000135074;ENSG00000142798;ENSG00000196218;ENSG00000122707;ENSG00000140545;ENSG00000240583;ENSG00000107485;ENSG00000150782;ENSG00000154734;ENSG00000134057;ENSG00000115008;ENSG00000112062;ENSG00000132646;ENSG00000069702;ENSG00000118523;ENSG00000198719;ENSG00000109472;ENSG00000184470;ENSG00000135250;ENSG00000112769;ENSG00000125730;ENSG00000169031;ENSG00000112715;ENSG00000170312;ENSG00000183023…	156	ENSG00000135074;ENSG00000142798;ENSG00000196218;ENSG00000122707;ENSG00000140545;ENSG00000240583;ENSG00000154734;ENSG00000069702;ENSG00000118523;ENSG00000109472;ENSG00000184470;ENSG00000135250;ENSG00000112769;ENSG00000183023;ENSG00000133392;ENSG00000138207;ENSG00000091583;ENSG00000204291;ENSG00000136110;ENSG00000067900;ENSG00000140416;ENSG00000114854;ENSG00000183873;ENSG00000120738;ENSG00000144810…	92	8728;3339;6261;8434;4240;358;9510;7049;1490;1363;10587;6733;3910;6546;4629;5950;350;1306;11061;6093;7168;7134;6331;1958;1295;23213;11005;1281;8048;23363;6788;3491;4040;93649;2049;93974;4625;6262;4607;5350;8613;1462;2069;11127;7139;1278;1000;6910;3204;9464;55212;5460;182;1289;8557;27063;4015;91807;2257;7481;133;5743;9421;27295;8854;5066;70;27286;9734;8100;3696;6678;59;54206;55553;7424;2247;3764;31…	92
biological process	leukocyte activation	GO:0045321	112	1.63	8.72e-07	CCL19;IL15;CD40LG;CD3E;XCL1;MS4A2;SLAMF7;GATA3;SCGB1A1;IL18;STXBP2;LCP2;HMOX1;FLT3;LYN;DOCK2;CD5;IDO1;HLA-DPA1;IL12A;TLR3;LAG3;CD247;PLCG2;RICTOR;CORO1A;TAC1;TLR4;IL23R;SAMSN1;ITGAL;SKAP2;IL2;BTK;PGLYRP1;CBLB;PTGER4;PRKCQ;PTPN22;CRTAM;MS4A1;LCP1;EXO1;HHEX;LEF1;IKZF3;PRKCB;NCKAP1L;HLA-DQB2;IL8;NOD2;PTK2B;DPP4;VCAM1;HLA-DRA;SHB;RUNX2;MINK1;EGR1;CX3CR1;CD3G;TNFSF13B;B2M;TNFSF8;CD27;SATB1;ICOS;SPINK5…	6363;3600;959;916;6375;2206;57823;2625;7356;3606;6813;3937;3162;2322;4067;1794;921;3620;3113;3592;7098;3902;919;5336;253260;11151;6863;7099;149233;64092;3683;8935;3558;695;8993;868;5734;5588;26191;56253;931;3936;9156;3087;51176;22806;5579;3071;3120;3576;64127;2185;1803;7412;3122;6461;860;50488;1958;1524;917;10673;567;944;939;6304;29851;11005;6714;1947;914;9734;3662;29108;11326;915;84106;89780;834…	ENSG00000172724;ENSG00000164136;ENSG00000102245;ENSG00000198851;ENSG00000143184;ENSG00000149534;ENSG00000026751;ENSG00000107485;ENSG00000149021;ENSG00000150782;ENSG00000076944;ENSG00000043462;ENSG00000100292;ENSG00000122025;ENSG00000254087;ENSG00000134516;ENSG00000110448;ENSG00000131203;ENSG00000231389;ENSG00000168811;ENSG00000164342;ENSG00000089692;ENSG00000198821;ENSG00000197943;ENSG00000164327…	ENSG00000172724;ENSG00000164136;ENSG00000102245;ENSG00000198851;ENSG00000143184;ENSG00000149534;ENSG00000026751;ENSG00000107485;ENSG00000149021;ENSG00000150782;ENSG00000076944;ENSG00000043462;ENSG00000100292;ENSG00000122025;ENSG00000254087;ENSG00000134516;ENSG00000110448;ENSG00000131203;ENSG00000231389;ENSG00000168811;ENSG00000164342;ENSG00000089692;ENSG00000198821;ENSG00000197943;ENSG00000164327…	112	ENSG00000172724;ENSG00000164136;ENSG00000102245;ENSG00000198851;ENSG00000143184;ENSG00000149534;ENSG00000026751;ENSG00000107485;ENSG00000149021;ENSG00000150782;ENSG00000076944;ENSG00000043462;ENSG00000100292;ENSG00000122025;ENSG00000254087;ENSG00000134516;ENSG00000110448;ENSG00000131203;ENSG00000231389;ENSG00000168811;ENSG00000164342;ENSG00000089692;ENSG00000198821;ENSG00000197943;ENSG00000164327…	105	6363;3600;959;916;6375;2206;57823;2625;7356;3606;6813;3937;3162;2322;4067;1794;921;3620;3113;3592;7098;3902;919;5336;253260;11151;6863;7099;149233;64092;3683;8935;3558;695;8993;868;5734;5588;26191;56253;931;3936;9156;3087;51176;22806;5579;3071;3120;3576;64127;2185;7412;3122;6461;860;50488;1524;917;10673;567;944;939;6304;29851;6714;1947;914;3662;29108;11326;915;84106;89780;834;80329;4602;10451;962…	105	ENSG00000172724;ENSG00000164136;ENSG00000102245;ENSG00000198851;ENSG00000143184;ENSG00000149534;ENSG00000026751;ENSG00000107485;ENSG00000149021;ENSG00000150782;ENSG00000076944;ENSG00000043462;ENSG00000100292;ENSG00000122025;ENSG00000254087;ENSG00000134516;ENSG00000110448;ENSG00000131203;ENSG00000231389;ENSG00000168811;ENSG00000164342;ENSG00000089692;ENSG00000198821;ENSG00000197943;ENSG00000164327…	112	ENSG00000197635;ENSG00000120738;ENSG00000133710;ENSG00000048052;ENSG00000122641;ENSG00000171150;ENSG00000123999	7	1803;1958;11005;9734;3624;9655;3623	7
biological process	cardiovascular system development	GO:0072358	156	1.5	8.72e-07	ADAM19;HSPG2;RYR1;RECK;MFGE8;AQP1;GATA3;IL18;ADAMTS1;CCNB1;IL1A;MAPK14;PCNA;TGFBR3;CTGF;DLL1;CPE;TXNRD2;SRPK2;LAMA4;C3;COL4A3;VEGFA;CDK1;SLC8A1;ASB4;MYH11;CXADR;RBP4;APOH;HHEX;LEF1;HPSE;CCBE1;IL8;COL15A1;LECT1;PTK2B;VCAM1;ROCK1;TPM1;SHB;TNNC1;SCN5A;EGR1;SELP;COL8A1;SULF1;C5;SPINK5;COL3A1;BMPER;CSRP3;OBSL1;STK3;CYR61;LRP6;TSPAN12;WNT3A;MYOCD;EPHB3;ATPIF1;MYH7;CXCL13;NSDHL;CALCRL;RYR2;SPINT1;MYBPC3…	8728;3339;6261;8434;4240;358;2625;3606;9510;891;3552;1432;5111;7049;1490;28514;1363;10587;6733;3910;718;1285;7422;983;6546;51666;4629;1525;5950;350;3087;51176;10855;147372;3576;1306;11061;2185;7412;6093;7168;6461;7134;6331;1958;6403;1295;23213;727;11005;1281;168667;8048;23363;6788;3491;4040;23554;89780;93649;2049;93974;4625;10563;50814;10203;6262;6692;4607;5350;577;8613;1462;2069;11127;7139;1278;…	ENSG00000135074;ENSG00000142798;ENSG00000196218;ENSG00000122707;ENSG00000140545;ENSG00000240583;ENSG00000107485;ENSG00000150782;ENSG00000154734;ENSG00000134057;ENSG00000115008;ENSG00000112062;ENSG00000132646;ENSG00000069702;ENSG00000118523;ENSG00000198719;ENSG00000109472;ENSG00000184470;ENSG00000135250;ENSG00000112769;ENSG00000125730;ENSG00000169031;ENSG00000112715;ENSG00000170312;ENSG00000183023…	ENSG00000135074;ENSG00000142798;ENSG00000196218;ENSG00000122707;ENSG00000140545;ENSG00000240583;ENSG00000107485;ENSG00000150782;ENSG00000154734;ENSG00000134057;ENSG00000115008;ENSG00000112062;ENSG00000132646;ENSG00000069702;ENSG00000118523;ENSG00000198719;ENSG00000109472;ENSG00000184470;ENSG00000135250;ENSG00000112769;ENSG00000125730;ENSG00000169031;ENSG00000112715;ENSG00000170312;ENSG00000183023…	156	ENSG00000107485;ENSG00000150782;ENSG00000134057;ENSG00000115008;ENSG00000112062;ENSG00000132646;ENSG00000198719;ENSG00000125730;ENSG00000169031;ENSG00000112715;ENSG00000170312;ENSG00000005981;ENSG00000154639;ENSG00000152804;ENSG00000138795;ENSG00000173083;ENSG00000183287;ENSG00000169429;ENSG00000120899;ENSG00000162692;ENSG00000107338;ENSG00000174175;ENSG00000106804;ENSG00000164619;ENSG00000106025…	64	2625;3606;891;3552;1432;5111;28514;718;1285;7422;983;51666;1525;3087;51176;10855;147372;3576;2185;7412;6461;6403;727;168667;23554;89780;10563;50814;10203;6692;577;5294;10163;2028;6491;3162;2022;841;6423;7453;3627;5579;6772;688;1524;9723;2113;8879;5787;655;7020;1512;27035;10451;7128;3676;729230;5140;2822;694;7852;51752;2876;196	64	ENSG00000135074;ENSG00000142798;ENSG00000196218;ENSG00000122707;ENSG00000140545;ENSG00000240583;ENSG00000107485;ENSG00000150782;ENSG00000154734;ENSG00000134057;ENSG00000115008;ENSG00000112062;ENSG00000132646;ENSG00000069702;ENSG00000118523;ENSG00000198719;ENSG00000109472;ENSG00000184470;ENSG00000135250;ENSG00000112769;ENSG00000125730;ENSG00000169031;ENSG00000112715;ENSG00000170312;ENSG00000183023…	156	ENSG00000135074;ENSG00000142798;ENSG00000196218;ENSG00000122707;ENSG00000140545;ENSG00000240583;ENSG00000154734;ENSG00000069702;ENSG00000118523;ENSG00000109472;ENSG00000184470;ENSG00000135250;ENSG00000112769;ENSG00000183023;ENSG00000133392;ENSG00000138207;ENSG00000091583;ENSG00000204291;ENSG00000136110;ENSG00000067900;ENSG00000140416;ENSG00000114854;ENSG00000183873;ENSG00000120738;ENSG00000144810…	92	8728;3339;6261;8434;4240;358;9510;7049;1490;1363;10587;6733;3910;6546;4629;5950;350;1306;11061;6093;7168;7134;6331;1958;1295;23213;11005;1281;8048;23363;6788;3491;4040;93649;2049;93974;4625;6262;4607;5350;8613;1462;2069;11127;7139;1278;1000;6910;3204;9464;55212;5460;182;1289;8557;27063;4015;91807;2257;7481;133;5743;9421;27295;8854;5066;70;27286;9734;8100;3696;6678;59;54206;55553;7424;2247;3764;31…	92
biological process	extracellular matrix organization	GO:0030198	56	2.03	1.12e-06	HSPG2;LGALS3;RECK;LEPREL1;VMO1;APBB1;COL8A1;TNXB;DDR2;SULF1;ETS1;ADAMTSL4;SPINK5;COL14A1;COL3A1;ELF3;ENG;MMP7;CTGF;CYR61;COL6A1;COL5A1;TFAP2A;LAMB2;NFKB2;WNT3A;MMP13;NOX1;LOX;TNF;FGFR4;FAP;COL6A2;FBLN5;COL5A2;COL4A3;LEPREL2;SFRP2;COL4A4;MMP1;SMOC2;SPINT1;MYH11;POSTN;COL13A1;PLOD2;NDNF;MMP8;COL15A1;SERPINB5;COL24A1;DPP4;COL1A2;MMP16;ECM2;IBSP	3339;3958;8434;55214;284013;322;1295;7148;4921;23213;2113;54507;11005;7373;1281;1999;2022;4316;1490;3491;1291;1289;7020;3913;4791;89780;4322;27035;4015;7124;2264;2191;1292;10516;1290;1285;10536;6423;1286;4312;64094;6692;4629;10631;1305;5352;79625;4317;1306;5268;255631;1803;1278;4325;1842;3381	ENSG00000142798;ENSG00000131981;ENSG00000122707;ENSG00000090530;ENSG00000182853;ENSG00000166313;ENSG00000144810;ENSG00000168477;ENSG00000162733;ENSG00000137573;ENSG00000134954;ENSG00000143382;ENSG00000133710;ENSG00000187955;ENSG00000168542;ENSG00000163435;ENSG00000106991;ENSG00000137673;ENSG00000118523;ENSG00000142871;ENSG00000142156;ENSG00000130635;ENSG00000137203;ENSG00000172037;ENSG00000077150…	ENSG00000142798;ENSG00000131981;ENSG00000122707;ENSG00000090530;ENSG00000182853;ENSG00000166313;ENSG00000144810;ENSG00000168477;ENSG00000162733;ENSG00000137573;ENSG00000134954;ENSG00000143382;ENSG00000133710;ENSG00000187955;ENSG00000168542;ENSG00000163435;ENSG00000106991;ENSG00000137673;ENSG00000118523;ENSG00000142871;ENSG00000142156;ENSG00000130635;ENSG00000137203;ENSG00000172037;ENSG00000077150…	56	ENSG00000131981;ENSG00000182853;ENSG00000134954;ENSG00000163435;ENSG00000106991;ENSG00000137673;ENSG00000137203;ENSG00000077150;ENSG00000154342;ENSG00000137745;ENSG00000007952;ENSG00000232810;ENSG00000160867;ENSG00000169031;ENSG00000145423;ENSG00000081052;ENSG00000196611;ENSG00000166145;ENSG00000133110;ENSG00000173376;ENSG00000206075;ENSG00000029559	22	3958;284013;2113;1999;2022;4316;7020;4791;89780;4322;27035;7124;2264;1285;6423;1286;4312;6692;10631;79625;5268;3381	22	ENSG00000142798;ENSG00000131981;ENSG00000122707;ENSG00000090530;ENSG00000182853;ENSG00000166313;ENSG00000144810;ENSG00000168477;ENSG00000162733;ENSG00000137573;ENSG00000134954;ENSG00000143382;ENSG00000133710;ENSG00000187955;ENSG00000168542;ENSG00000163435;ENSG00000106991;ENSG00000137673;ENSG00000118523;ENSG00000142871;ENSG00000142156;ENSG00000130635;ENSG00000137203;ENSG00000172037;ENSG00000077150…	56	ENSG00000142798;ENSG00000122707;ENSG00000090530;ENSG00000166313;ENSG00000144810;ENSG00000168477;ENSG00000162733;ENSG00000137573;ENSG00000143382;ENSG00000133710;ENSG00000187955;ENSG00000168542;ENSG00000118523;ENSG00000142871;ENSG00000142156;ENSG00000130635;ENSG00000172037;ENSG00000113083;ENSG00000078098;ENSG00000142173;ENSG00000140092;ENSG00000204262;ENSG00000110811;ENSG00000112562;ENSG00000133392…	34	3339;8434;55214;322;1295;7148;4921;23213;54507;11005;7373;1281;1490;3491;1291;1289;3913;4015;2191;1292;10516;1290;10536;64094;4629;1305;5352;4317;1306;255631;1803;1278;4325;1842	34
biological process	biological adhesion	GO:0022610	160	1.49	1.23e-06	ADAMDEC1;PLXNC1;CD40LG;MFGE8;SLAMF7;S100A8;IL18;HAS2;HAPLN1;IL12A;LAMA3;CTGF;DLL1;ZAN;CLDN4;TACSTD2;TGM2;BOC;LAMA4;ITGB7;SGCE;ITGAL;COL4A3;SELE;IL2;EZR;SMOC2;VEGFA;HCK;CD36;LGALS4;CXADR;ITGB2;LEF1;HPSE;NCKAP1L;IL8;COL15A1;PTK2B;DPP4;VCAM1;ROCK1;TPM1;VWA2;AMICA1;SERPINE2;AEBP1;OLR1;BVES;CXCR7;SELP;COL8A1;SSPN;THBS3;ITGB5;SPINK5;COL3A1;MYBPH;ITGA3;CYR61;COL6A1;PRKG1;FXYD5;LAMB2;MPDZ;NPTN;WNT3A;DCHS…	27299;10154;959;4240;57823;6279;3606;3037;1404;3592;3909;1490;28514;7455;1364;4070;7052;91653;3910;3695;8910;3683;1285;6401;3558;7430;64094;7422;3055;948;3960;1525;3689;51176;10855;3071;3576;1306;2185;1803;7412;6093;7168;340706;120425;5270;165;4973;11149;57007;6403;1295;8082;7059;3693;11005;1281;4608;3675;3491;1291;5592;53827;3913;8777;27020;89780;54798;1366;2049;7130;10563;971;4607;152015;10631;…	ENSG00000134028;ENSG00000136040;ENSG00000102245;ENSG00000140545;ENSG00000026751;ENSG00000143546;ENSG00000150782;ENSG00000170961;ENSG00000145681;ENSG00000168811;ENSG00000053747;ENSG00000118523;ENSG00000198719;ENSG00000146839;ENSG00000189143;ENSG00000184292;ENSG00000198959;ENSG00000144857;ENSG00000112769;ENSG00000139626;ENSG00000127990;ENSG00000005844;ENSG00000169031;ENSG00000007908;ENSG00000109471…	ENSG00000134028;ENSG00000136040;ENSG00000102245;ENSG00000140545;ENSG00000026751;ENSG00000143546;ENSG00000150782;ENSG00000170961;ENSG00000145681;ENSG00000168811;ENSG00000053747;ENSG00000118523;ENSG00000198719;ENSG00000146839;ENSG00000189143;ENSG00000184292;ENSG00000198959;ENSG00000144857;ENSG00000112769;ENSG00000139626;ENSG00000127990;ENSG00000005844;ENSG00000169031;ENSG00000007908;ENSG00000109471…	160	ENSG00000134028;ENSG00000136040;ENSG00000102245;ENSG00000026751;ENSG00000143546;ENSG00000150782;ENSG00000168811;ENSG00000053747;ENSG00000198719;ENSG00000146839;ENSG00000189143;ENSG00000184292;ENSG00000139626;ENSG00000005844;ENSG00000169031;ENSG00000109471;ENSG00000092820;ENSG00000112715;ENSG00000101336;ENSG00000135218;ENSG00000171747;ENSG00000154639;ENSG00000160255;ENSG00000138795;ENSG00000173083…	92	27299;10154;959;57823;6279;3606;3592;3909;28514;7455;1364;4070;3695;3683;1285;3558;7430;7422;3055;948;3960;1525;3689;51176;10855;3071;3576;2185;7412;340706;120425;5270;4973;6403;4608;3675;53827;89780;1366;7130;10563;971;152015;10631;961;57091;5294;3381;7122;6288;1475;4067;9073;3371;5341;2022;10225;94025;10894;3557;11151;3687;3694;6423;5588;214;79625;8416;9076;50488;1524;6402;9723;6714;1947;914;94…	92	ENSG00000134028;ENSG00000136040;ENSG00000102245;ENSG00000140545;ENSG00000026751;ENSG00000143546;ENSG00000150782;ENSG00000170961;ENSG00000145681;ENSG00000168811;ENSG00000053747;ENSG00000118523;ENSG00000198719;ENSG00000146839;ENSG00000189143;ENSG00000184292;ENSG00000198959;ENSG00000144857;ENSG00000112769;ENSG00000139626;ENSG00000127990;ENSG00000005844;ENSG00000169031;ENSG00000007908;ENSG00000109471…	160	ENSG00000140545;ENSG00000170961;ENSG00000145681;ENSG00000118523;ENSG00000198959;ENSG00000144857;ENSG00000112769;ENSG00000127990;ENSG00000007908;ENSG00000112562;ENSG00000204291;ENSG00000197635;ENSG00000067900;ENSG00000140416;ENSG00000106624;ENSG00000112276;ENSG00000144476;ENSG00000144810;ENSG00000123096;ENSG00000169231;ENSG00000082781;ENSG00000133710;ENSG00000168542;ENSG00000142871;ENSG00000142156…	68	4240;3037;1404;1490;7052;91653;3910;8910;6401;64094;1306;1803;6093;7168;165;11149;57007;1295;8082;7059;3693;11005;1281;3491;1291;5592;3913;8777;27020;54798;2049;4607;1305;8613;2195;1462;2045;1000;1842;3204;660;10580;4921;7148;7373;8406;8496;1289;1292;54549;394;5068;131566;1272;54751;10020;88;27286;3696;23189;10516;4958;9993;390;9096;3685;59272;4867	68
biological process	extracellular structure organization	GO:0043062	56	2.02	1.52e-06	HSPG2;LGALS3;RECK;LEPREL1;VMO1;APBB1;COL8A1;TNXB;DDR2;SULF1;ETS1;ADAMTSL4;SPINK5;COL14A1;COL3A1;ELF3;ENG;MMP7;CTGF;CYR61;COL6A1;COL5A1;TFAP2A;LAMB2;NFKB2;WNT3A;MMP13;NOX1;LOX;TNF;FGFR4;FAP;COL6A2;FBLN5;COL5A2;COL4A3;LEPREL2;SFRP2;COL4A4;MMP1;SMOC2;SPINT1;MYH11;POSTN;COL13A1;PLOD2;NDNF;MMP8;COL15A1;SERPINB5;COL24A1;DPP4;COL1A2;MMP16;ECM2;IBSP	3339;3958;8434;55214;284013;322;1295;7148;4921;23213;2113;54507;11005;7373;1281;1999;2022;4316;1490;3491;1291;1289;7020;3913;4791;89780;4322;27035;4015;7124;2264;2191;1292;10516;1290;1285;10536;6423;1286;4312;64094;6692;4629;10631;1305;5352;79625;4317;1306;5268;255631;1803;1278;4325;1842;3381	ENSG00000142798;ENSG00000131981;ENSG00000122707;ENSG00000090530;ENSG00000182853;ENSG00000166313;ENSG00000144810;ENSG00000168477;ENSG00000162733;ENSG00000137573;ENSG00000134954;ENSG00000143382;ENSG00000133710;ENSG00000187955;ENSG00000168542;ENSG00000163435;ENSG00000106991;ENSG00000137673;ENSG00000118523;ENSG00000142871;ENSG00000142156;ENSG00000130635;ENSG00000137203;ENSG00000172037;ENSG00000077150…	ENSG00000142798;ENSG00000131981;ENSG00000122707;ENSG00000090530;ENSG00000182853;ENSG00000166313;ENSG00000144810;ENSG00000168477;ENSG00000162733;ENSG00000137573;ENSG00000134954;ENSG00000143382;ENSG00000133710;ENSG00000187955;ENSG00000168542;ENSG00000163435;ENSG00000106991;ENSG00000137673;ENSG00000118523;ENSG00000142871;ENSG00000142156;ENSG00000130635;ENSG00000137203;ENSG00000172037;ENSG00000077150…	56	ENSG00000131981;ENSG00000182853;ENSG00000134954;ENSG00000163435;ENSG00000106991;ENSG00000137673;ENSG00000137203;ENSG00000077150;ENSG00000154342;ENSG00000137745;ENSG00000007952;ENSG00000232810;ENSG00000160867;ENSG00000169031;ENSG00000145423;ENSG00000081052;ENSG00000196611;ENSG00000166145;ENSG00000133110;ENSG00000173376;ENSG00000206075;ENSG00000029559	22	3958;284013;2113;1999;2022;4316;7020;4791;89780;4322;27035;7124;2264;1285;6423;1286;4312;6692;10631;79625;5268;3381	22	ENSG00000142798;ENSG00000131981;ENSG00000122707;ENSG00000090530;ENSG00000182853;ENSG00000166313;ENSG00000144810;ENSG00000168477;ENSG00000162733;ENSG00000137573;ENSG00000134954;ENSG00000143382;ENSG00000133710;ENSG00000187955;ENSG00000168542;ENSG00000163435;ENSG00000106991;ENSG00000137673;ENSG00000118523;ENSG00000142871;ENSG00000142156;ENSG00000130635;ENSG00000137203;ENSG00000172037;ENSG00000077150…	56	ENSG00000142798;ENSG00000122707;ENSG00000090530;ENSG00000166313;ENSG00000144810;ENSG00000168477;ENSG00000162733;ENSG00000137573;ENSG00000143382;ENSG00000133710;ENSG00000187955;ENSG00000168542;ENSG00000118523;ENSG00000142871;ENSG00000142156;ENSG00000130635;ENSG00000172037;ENSG00000113083;ENSG00000078098;ENSG00000142173;ENSG00000140092;ENSG00000204262;ENSG00000110811;ENSG00000112562;ENSG00000133392…	34	3339;8434;55214;322;1295;7148;4921;23213;54507;11005;7373;1281;1490;3491;1291;1289;3913;4015;2191;1292;10516;1290;10536;64094;4629;1305;5352;4317;1306;255631;1803;1278;4325;1842	34
biological process	regulation of biological quality	GO:0065008	388	1.26	1.75e-06	P2RY4;SLC22A3;RYR1;CD40LG;PYGM;ATP8A1;TAP1;AQP1;S100A8;GATA3;SCGB1A1;IL18;FGG;SYTL4;CCNB1;HAS2;KIFC1;WEE1;TGFBR3;RIMS1;ACSM1;SLC46A1;KCNS3;DLD;CPE;SEH1L;IL2;DDO;KCNA5;KDELR3;AURKB;HCK;CD36;SLC8A1;GNAI1;HSD17B11;RBP4;APOH;ENPP1;SLC25A4;NCKAP1L;BAMBI;PDILT;TPM1;TNNC1;SCN5A;CHRNA9;SLC7A7;EGR1;NFKBIE;OLR1;SELP;GLRB;PRKAA1;C5;NEDD4L;CD27;COL3A1;SPAG5;RAC2;SDR16C5;CSRP3;ITGA3;AQP4;NEK2;PRKG1;CADPS2;CPS…	5030;6581;6261;959;5837;10396;6890;358;6279;2625;7356;3606;2266;94121;891;3037;3833;7465;7049;22999;116285;113235;3790;1738;1363;81929;3558;8528;3741;11015;9212;3055;948;6546;2770;51170;5950;350;5167;291;3071;25805;204474;7168;7134;6331;55584;9056;1958;4794;4973;6403;2743;5562;727;23327;939;1281;10615;5880;195814;8048;3675;361;4751;5592;93664;10898;3624;2049;4602;2512;10563;5376;6262;2201;10577;1…	ENSG00000186912;ENSG00000146477;ENSG00000196218;ENSG00000102245;ENSG00000068976;ENSG00000124406;ENSG00000168394;ENSG00000240583;ENSG00000143546;ENSG00000107485;ENSG00000149021;ENSG00000150782;ENSG00000171557;ENSG00000102362;ENSG00000134057;ENSG00000170961;ENSG00000237649;ENSG00000166483;ENSG00000069702;ENSG00000079841;ENSG00000166743;ENSG00000076351;ENSG00000170745;ENSG00000091140;ENSG00000109472…	ENSG00000186912;ENSG00000146477;ENSG00000196218;ENSG00000102245;ENSG00000068976;ENSG00000124406;ENSG00000168394;ENSG00000240583;ENSG00000143546;ENSG00000107485;ENSG00000149021;ENSG00000150782;ENSG00000171557;ENSG00000102362;ENSG00000134057;ENSG00000170961;ENSG00000237649;ENSG00000166483;ENSG00000069702;ENSG00000079841;ENSG00000166743;ENSG00000076351;ENSG00000170745;ENSG00000091140;ENSG00000109472…	388	ENSG00000186912;ENSG00000102245;ENSG00000124406;ENSG00000168394;ENSG00000143546;ENSG00000107485;ENSG00000149021;ENSG00000150782;ENSG00000171557;ENSG00000134057;ENSG00000237649;ENSG00000076351;ENSG00000170745;ENSG00000109471;ENSG00000178999;ENSG00000101336;ENSG00000135218;ENSG00000198189;ENSG00000123338;ENSG00000174343;ENSG00000155465;ENSG00000146232;ENSG00000173391;ENSG00000174175;ENSG00000132356…	229	5030;959;10396;6890;6279;2625;7356;3606;2266;891;3833;113235;3790;3558;9212;3055;948;51170;3071;55584;9056;4794;4973;6403;5562;727;23327;939;10615;5880;195814;3675;361;4751;93664;4602;2512;10563;2201;10577;154;5873;479;24137;6708;84649;55785;6790;245972;7222;5294;5741;6296;3659;523;6375;3937;3162;2322;5341;7098;752;253260;6863;5984;1356;480;5588;820;4864;57205;27230;5579;5172;1636;4036;2113;6714;…	229	ENSG00000186912;ENSG00000146477;ENSG00000196218;ENSG00000102245;ENSG00000068976;ENSG00000124406;ENSG00000168394;ENSG00000240583;ENSG00000143546;ENSG00000107485;ENSG00000149021;ENSG00000150782;ENSG00000171557;ENSG00000102362;ENSG00000134057;ENSG00000170961;ENSG00000237649;ENSG00000166483;ENSG00000069702;ENSG00000079841;ENSG00000166743;ENSG00000076351;ENSG00000170745;ENSG00000091140;ENSG00000109472…	388	ENSG00000146477;ENSG00000196218;ENSG00000068976;ENSG00000240583;ENSG00000102362;ENSG00000170961;ENSG00000166483;ENSG00000069702;ENSG00000079841;ENSG00000166743;ENSG00000091140;ENSG00000109472;ENSG00000085415;ENSG00000203797;ENSG00000130037;ENSG00000100196;ENSG00000183023;ENSG00000127955;ENSG00000138207;ENSG00000091583;ENSG00000197594;ENSG00000151729;ENSG00000095739;ENSG00000169340;ENSG00000140416…	159	6581;6261;5837;358;94121;3037;7465;7049;22999;116285;1738;1363;81929;8528;3741;11015;6546;2770;5950;350;5167;291;25805;204474;7168;7134;6331;1958;2743;1281;8048;5592;10898;3624;2049;5376;6262;1374;3931;51301;5350;6508;1278;37;1000;9627;10058;6517;4882;5037;5139;2317;65266;51339;2191;54961;91807;4878;23516;27165;9215;10468;57088;26058;4852;50808;55553;7424;23189;3778;55288;3623;57493;8425;6424;271…	159
biological process	cell adhesion	GO:0007155	159	1.48	1.76e-06	ADAMDEC1;PLXNC1;CD40LG;MFGE8;SLAMF7;S100A8;IL18;HAS2;HAPLN1;IL12A;LAMA3;CTGF;DLL1;ZAN;CLDN4;TACSTD2;TGM2;BOC;LAMA4;ITGB7;SGCE;ITGAL;COL4A3;SELE;IL2;EZR;SMOC2;VEGFA;HCK;CD36;LGALS4;CXADR;ITGB2;LEF1;HPSE;NCKAP1L;IL8;COL15A1;PTK2B;DPP4;VCAM1;ROCK1;TPM1;VWA2;AMICA1;SERPINE2;AEBP1;OLR1;BVES;CXCR7;SELP;COL8A1;SSPN;THBS3;ITGB5;SPINK5;COL3A1;MYBPH;ITGA3;CYR61;COL6A1;PRKG1;FXYD5;LAMB2;MPDZ;NPTN;WNT3A;DCHS…	27299;10154;959;4240;57823;6279;3606;3037;1404;3592;3909;1490;28514;7455;1364;4070;7052;91653;3910;3695;8910;3683;1285;6401;3558;7430;64094;7422;3055;948;3960;1525;3689;51176;10855;3071;3576;1306;2185;1803;7412;6093;7168;340706;120425;5270;165;4973;11149;57007;6403;1295;8082;7059;3693;11005;1281;4608;3675;3491;1291;5592;53827;3913;8777;27020;89780;54798;1366;2049;7130;10563;971;4607;152015;10631;…	ENSG00000134028;ENSG00000136040;ENSG00000102245;ENSG00000140545;ENSG00000026751;ENSG00000143546;ENSG00000150782;ENSG00000170961;ENSG00000145681;ENSG00000168811;ENSG00000053747;ENSG00000118523;ENSG00000198719;ENSG00000146839;ENSG00000189143;ENSG00000184292;ENSG00000198959;ENSG00000144857;ENSG00000112769;ENSG00000139626;ENSG00000127990;ENSG00000005844;ENSG00000169031;ENSG00000007908;ENSG00000109471…	ENSG00000134028;ENSG00000136040;ENSG00000102245;ENSG00000140545;ENSG00000026751;ENSG00000143546;ENSG00000150782;ENSG00000170961;ENSG00000145681;ENSG00000168811;ENSG00000053747;ENSG00000118523;ENSG00000198719;ENSG00000146839;ENSG00000189143;ENSG00000184292;ENSG00000198959;ENSG00000144857;ENSG00000112769;ENSG00000139626;ENSG00000127990;ENSG00000005844;ENSG00000169031;ENSG00000007908;ENSG00000109471…	159	ENSG00000134028;ENSG00000136040;ENSG00000102245;ENSG00000026751;ENSG00000143546;ENSG00000150782;ENSG00000168811;ENSG00000053747;ENSG00000198719;ENSG00000146839;ENSG00000189143;ENSG00000184292;ENSG00000139626;ENSG00000005844;ENSG00000169031;ENSG00000109471;ENSG00000092820;ENSG00000112715;ENSG00000101336;ENSG00000135218;ENSG00000171747;ENSG00000154639;ENSG00000160255;ENSG00000138795;ENSG00000173083…	92	27299;10154;959;57823;6279;3606;3592;3909;28514;7455;1364;4070;3695;3683;1285;3558;7430;7422;3055;948;3960;1525;3689;51176;10855;3071;3576;2185;7412;340706;120425;5270;4973;6403;4608;3675;53827;89780;1366;7130;10563;971;152015;10631;961;57091;5294;3381;7122;6288;1475;4067;9073;3371;5341;2022;10225;94025;10894;3557;11151;3687;3694;6423;5588;214;79625;8416;9076;50488;1524;6402;9723;6714;1947;914;94…	92	ENSG00000134028;ENSG00000136040;ENSG00000102245;ENSG00000140545;ENSG00000026751;ENSG00000143546;ENSG00000150782;ENSG00000170961;ENSG00000145681;ENSG00000168811;ENSG00000053747;ENSG00000118523;ENSG00000198719;ENSG00000146839;ENSG00000189143;ENSG00000184292;ENSG00000198959;ENSG00000144857;ENSG00000112769;ENSG00000139626;ENSG00000127990;ENSG00000005844;ENSG00000169031;ENSG00000007908;ENSG00000109471…	159	ENSG00000140545;ENSG00000170961;ENSG00000145681;ENSG00000118523;ENSG00000198959;ENSG00000144857;ENSG00000112769;ENSG00000127990;ENSG00000007908;ENSG00000112562;ENSG00000204291;ENSG00000197635;ENSG00000067900;ENSG00000140416;ENSG00000106624;ENSG00000112276;ENSG00000144476;ENSG00000144810;ENSG00000123096;ENSG00000169231;ENSG00000082781;ENSG00000133710;ENSG00000168542;ENSG00000142871;ENSG00000142156…	67	4240;3037;1404;1490;7052;91653;3910;8910;6401;64094;1306;1803;6093;7168;165;11149;57007;1295;8082;7059;3693;11005;1281;3491;1291;5592;3913;8777;27020;54798;2049;4607;1305;8613;2195;1462;2045;1000;1842;3204;660;10580;4921;7148;7373;8406;8496;1289;1292;54549;394;5068;131566;1272;54751;10020;88;27286;3696;23189;10516;4958;9993;390;9096;3685;4867	67
biological process	response to stress	GO:0006950	451	1.23	1.86e-06	DNAJB4;RYR1;CD40LG;PYGM;DNAJC3;TAP1;AQP1;CCNO;S100A8;GATA3;SCGB1A1;IL18;FGG;CCNB1;HAS2;KIFC1;IDO1;WEE1;IL12A;SH2D1A;TGFBR3;MMP7;CTGF;UBE2T;EDEM1;MANF;RAD1;SMAD9;COQ7;CASP9;IL2;BTK;MKI67;KCNA5;KDELR3;HCK;CD36;SLC8A1;GNAI1;APOH;HHEX;NOD2;TPM1;DDX58;SLC7A7;ALOX5AP;EGR1;OLR1;CLSPN;SELP;TP53INP1;PRKAA1;GADD45G;C5;TNFSF8;CD27;COL3A1;GPX8;ELF3;RAC2;ITGA3;CYR61;BDH1;SFTPB;AQP4;PRKG1;TPST1;LAMB2;ST8SIA1;C…	11080;6261;959;5837;5611;6890;358;10309;6279;2625;7356;3606;2266;891;3037;3833;3620;7465;3592;4068;7049;4316;1490;29089;9695;7873;5810;4093;10229;842;3558;695;4288;3741;11015;3055;948;6546;2770;350;3087;64127;7168;23586;9056;241;1958;4973;63967;6403;94241;5562;10912;727;944;939;1281;493869;1999;5880;3675;3491;622;6439;361;5592;8460;3913;6489;834;3624;4602;10563;130120;3158;10203;6262;154;26355;68…	ENSG00000162616;ENSG00000196218;ENSG00000102245;ENSG00000068976;ENSG00000102580;ENSG00000168394;ENSG00000240583;ENSG00000152669;ENSG00000143546;ENSG00000107485;ENSG00000149021;ENSG00000150782;ENSG00000171557;ENSG00000134057;ENSG00000170961;ENSG00000237649;ENSG00000131203;ENSG00000166483;ENSG00000168811;ENSG00000183918;ENSG00000069702;ENSG00000137673;ENSG00000118523;ENSG00000077152;ENSG00000134109…	ENSG00000162616;ENSG00000196218;ENSG00000102245;ENSG00000068976;ENSG00000102580;ENSG00000168394;ENSG00000240583;ENSG00000152669;ENSG00000143546;ENSG00000107485;ENSG00000149021;ENSG00000150782;ENSG00000171557;ENSG00000134057;ENSG00000170961;ENSG00000237649;ENSG00000131203;ENSG00000166483;ENSG00000168811;ENSG00000183918;ENSG00000069702;ENSG00000137673;ENSG00000118523;ENSG00000077152;ENSG00000134109…	451	ENSG00000102245;ENSG00000102580;ENSG00000168394;ENSG00000152669;ENSG00000143546;ENSG00000107485;ENSG00000149021;ENSG00000150782;ENSG00000171557;ENSG00000134057;ENSG00000237649;ENSG00000131203;ENSG00000168811;ENSG00000183918;ENSG00000137673;ENSG00000077152;ENSG00000134109;ENSG00000145050;ENSG00000113456;ENSG00000132906;ENSG00000109471;ENSG00000010671;ENSG00000148773;ENSG00000101336;ENSG00000135218…	315	959;5611;6890;10309;6279;2625;7356;3606;2266;891;3833;3620;3592;4068;4316;29089;9695;7873;5810;842;3558;695;4288;3055;948;3087;64127;23586;9056;241;4973;63967;6403;94241;5562;727;944;939;1999;5880;3675;6439;361;6489;834;4602;10563;130120;3158;10203;154;6809;5873;5320;24137;5699;5888;1378;10068;716;1800;7222;64135;5294;3659;6375;3937;3162;115362;5341;890;7098;3902;8564;56915;6863;841;51297;5984;89…	315	ENSG00000162616;ENSG00000196218;ENSG00000102245;ENSG00000068976;ENSG00000102580;ENSG00000168394;ENSG00000240583;ENSG00000152669;ENSG00000143546;ENSG00000107485;ENSG00000149021;ENSG00000150782;ENSG00000171557;ENSG00000134057;ENSG00000170961;ENSG00000237649;ENSG00000131203;ENSG00000166483;ENSG00000168811;ENSG00000183918;ENSG00000069702;ENSG00000137673;ENSG00000118523;ENSG00000077152;ENSG00000134109…	451	ENSG00000162616;ENSG00000196218;ENSG00000068976;ENSG00000240583;ENSG00000170961;ENSG00000166483;ENSG00000069702;ENSG00000118523;ENSG00000120693;ENSG00000167186;ENSG00000130037;ENSG00000100196;ENSG00000183023;ENSG00000127955;ENSG00000091583;ENSG00000140416;ENSG00000120738;ENSG00000130222;ENSG00000168542;ENSG00000164294;ENSG00000142871;ENSG00000161267;ENSG00000185532;ENSG00000169902;ENSG00000172037…	136	11080;6261;5837;358;3037;7465;7049;1490;4093;10229;3741;11015;6546;2770;350;7168;1958;10912;1281;493869;3491;622;5592;8460;3913;3624;6262;26355;1462;4929;1278;37;3316;5037;5139;51339;1289;8557;80254;4620;4015;2191;91807;467;9365;131566;84451;5066;51495;64965;57088;126393;84709;50808;54206;5694;23189;7424;10276;3778;2353;6424;5352;81029;2775;7374;8013;3685;59272;1649;11216;3779;133522;11004;5136;1…	136
molecular function	carbohydrate derivative binding	GO:0097367	46	2.03	9.4e-05	SERPINE2;SELP;LIPH;TNXB;SELL;ADAMTS1;THBS3;HAPLN1;ENG;TGFBR3;CTGF;CYR61;CHI3L2;COL5A1;LYVE1;PCOLCE2;BGN;CD44;FGFR4;CXCL13;TNFAIP6;FGF2;RSPO1;PGLYRP1;FGF12;SMOC2;VEGFA;LIPC;DPYSL3;APOH;PTPRC;FSTL1;LTBP4;POSTN;NOD1;COL13A1;FGFBP1;VCAN;NDNF;NOD2;FGF7;LPL;CHIT1;ECM2;MAMDC2;PTN	5270;6403;200879;7148;6402;9510;7059;1404;2022;7049;1490;3491;1117;1289;10894;26577;633;960;2264;10563;7130;2247;284654;8993;2257;64094;7422;3990;1809;350;5788;11167;8425;10631;10392;1305;9982;1462;79625;64127;2252;4023;1118;1842;256691;5764	ENSG00000135919;ENSG00000174175;ENSG00000163898;ENSG00000168477;ENSG00000188404;ENSG00000154734;ENSG00000169231;ENSG00000145681;ENSG00000106991;ENSG00000069702;ENSG00000118523;ENSG00000142871;ENSG00000064886;ENSG00000130635;ENSG00000133800;ENSG00000163710;ENSG00000182492;ENSG00000026508;ENSG00000160867;ENSG00000156234;ENSG00000123610;ENSG00000138685;ENSG00000169218;ENSG00000008438;ENSG00000114279…	ENSG00000135919;ENSG00000174175;ENSG00000163898;ENSG00000168477;ENSG00000188404;ENSG00000154734;ENSG00000169231;ENSG00000145681;ENSG00000106991;ENSG00000069702;ENSG00000118523;ENSG00000142871;ENSG00000064886;ENSG00000130635;ENSG00000133800;ENSG00000163710;ENSG00000182492;ENSG00000026508;ENSG00000160867;ENSG00000156234;ENSG00000123610;ENSG00000138685;ENSG00000169218;ENSG00000008438;ENSG00000114279…	46	ENSG00000135919;ENSG00000174175;ENSG00000163898;ENSG00000188404;ENSG00000106991;ENSG00000064886;ENSG00000133800;ENSG00000026508;ENSG00000160867;ENSG00000156234;ENSG00000123610;ENSG00000169218;ENSG00000008438;ENSG00000112715;ENSG00000166035;ENSG00000081237;ENSG00000133110;ENSG00000106100;ENSG00000173376;ENSG00000167207;ENSG00000140285;ENSG00000175445;ENSG00000133063	23	5270;6403;200879;6402;2022;1117;10894;960;2264;10563;7130;284654;8993;7422;3990;5788;10631;10392;79625;64127;2252;4023;1118	23	ENSG00000135919;ENSG00000174175;ENSG00000163898;ENSG00000168477;ENSG00000188404;ENSG00000154734;ENSG00000169231;ENSG00000145681;ENSG00000106991;ENSG00000069702;ENSG00000118523;ENSG00000142871;ENSG00000064886;ENSG00000130635;ENSG00000133800;ENSG00000163710;ENSG00000182492;ENSG00000026508;ENSG00000160867;ENSG00000156234;ENSG00000123610;ENSG00000138685;ENSG00000169218;ENSG00000008438;ENSG00000114279…	46	ENSG00000168477;ENSG00000154734;ENSG00000169231;ENSG00000145681;ENSG00000069702;ENSG00000118523;ENSG00000142871;ENSG00000130635;ENSG00000163710;ENSG00000182492;ENSG00000138685;ENSG00000114279;ENSG00000112562;ENSG00000113657;ENSG00000091583;ENSG00000163430;ENSG00000090006;ENSG00000197467;ENSG00000137440;ENSG00000038427;ENSG00000106823;ENSG00000165072;ENSG00000105894	23	7148;9510;7059;1404;7049;1490;3491;1289;26577;633;2247;2257;64094;1809;350;11167;8425;1305;9982;1462;1842;256691;5764	23
molecular function	glycosaminoglycan binding	GO:0005539	44	2.06	9.4e-05	SERPINE2;SELP;LIPH;TNXB;SELL;ADAMTS1;THBS3;HAPLN1;ENG;TGFBR3;CTGF;CYR61;COL5A1;LYVE1;PCOLCE2;BGN;CD44;FGFR4;CXCL13;TNFAIP6;FGF2;RSPO1;PGLYRP1;FGF12;SMOC2;VEGFA;LIPC;DPYSL3;APOH;PTPRC;FSTL1;LTBP4;POSTN;NOD1;COL13A1;FGFBP1;VCAN;NDNF;NOD2;FGF7;LPL;ECM2;MAMDC2;PTN	5270;6403;200879;7148;6402;9510;7059;1404;2022;7049;1490;3491;1289;10894;26577;633;960;2264;10563;7130;2247;284654;8993;2257;64094;7422;3990;1809;350;5788;11167;8425;10631;10392;1305;9982;1462;79625;64127;2252;4023;1842;256691;5764	ENSG00000135919;ENSG00000174175;ENSG00000163898;ENSG00000168477;ENSG00000188404;ENSG00000154734;ENSG00000169231;ENSG00000145681;ENSG00000106991;ENSG00000069702;ENSG00000118523;ENSG00000142871;ENSG00000130635;ENSG00000133800;ENSG00000163710;ENSG00000182492;ENSG00000026508;ENSG00000160867;ENSG00000156234;ENSG00000123610;ENSG00000138685;ENSG00000169218;ENSG00000008438;ENSG00000114279;ENSG00000112562…	ENSG00000135919;ENSG00000174175;ENSG00000163898;ENSG00000168477;ENSG00000188404;ENSG00000154734;ENSG00000169231;ENSG00000145681;ENSG00000106991;ENSG00000069702;ENSG00000118523;ENSG00000142871;ENSG00000130635;ENSG00000133800;ENSG00000163710;ENSG00000182492;ENSG00000026508;ENSG00000160867;ENSG00000156234;ENSG00000123610;ENSG00000138685;ENSG00000169218;ENSG00000008438;ENSG00000114279;ENSG00000112562…	44	ENSG00000135919;ENSG00000174175;ENSG00000163898;ENSG00000188404;ENSG00000106991;ENSG00000133800;ENSG00000026508;ENSG00000160867;ENSG00000156234;ENSG00000123610;ENSG00000169218;ENSG00000008438;ENSG00000112715;ENSG00000166035;ENSG00000081237;ENSG00000133110;ENSG00000106100;ENSG00000173376;ENSG00000167207;ENSG00000140285;ENSG00000175445	21	5270;6403;200879;6402;2022;10894;960;2264;10563;7130;284654;8993;7422;3990;5788;10631;10392;79625;64127;2252;4023	21	ENSG00000135919;ENSG00000174175;ENSG00000163898;ENSG00000168477;ENSG00000188404;ENSG00000154734;ENSG00000169231;ENSG00000145681;ENSG00000106991;ENSG00000069702;ENSG00000118523;ENSG00000142871;ENSG00000130635;ENSG00000133800;ENSG00000163710;ENSG00000182492;ENSG00000026508;ENSG00000160867;ENSG00000156234;ENSG00000123610;ENSG00000138685;ENSG00000169218;ENSG00000008438;ENSG00000114279;ENSG00000112562…	44	ENSG00000168477;ENSG00000154734;ENSG00000169231;ENSG00000145681;ENSG00000069702;ENSG00000118523;ENSG00000142871;ENSG00000130635;ENSG00000163710;ENSG00000182492;ENSG00000138685;ENSG00000114279;ENSG00000112562;ENSG00000113657;ENSG00000091583;ENSG00000163430;ENSG00000090006;ENSG00000197467;ENSG00000137440;ENSG00000038427;ENSG00000106823;ENSG00000165072;ENSG00000105894	23	7148;9510;7059;1404;7049;1490;3491;1289;26577;633;2247;2257;64094;1809;350;11167;8425;1305;9982;1462;1842;256691;5764	23
molecular function	peptidase regulator activity	GO:0061134	43	1.95	0.0005	SERPINE2;RECK;CAST;PEBP1;A2M;C5;SERPINB10;CD27;CSTA;SPINK5;TPD52L1;WFDC2;TNFAIP8;ITIH3;GPC3;PYCARD;ITIH2;ITIH5;SERPINB11;PCOLCE2;CASP1;CTSH;SPINK2;C3;COL4A3;TNFAIP3;SFRP2;CRIM1;HSPA5;TFPI;SPINT1;LXN;SERPINI2;WFIKKN2;LEF1;NOD1;SPINT2;SERPINB5;ARRB1;DPEP1;MAL;MT3;GPX1	5270;8434;831;5037;2;727;5273;939;1475;11005;7164;10406;25816;3699;2719;29108;3698;80760;89778;26577;834;1512;6691;718;1285;7128;6423;51232;3309;7035;6692;56925;5276;124857;51176;10392;10653;5268;408;1800;4118;4504;2876	ENSG00000135919;ENSG00000122707;ENSG00000153113;ENSG00000089220;ENSG00000175899;ENSG00000106804;ENSG00000242550;ENSG00000139193;ENSG00000121552;ENSG00000133710;ENSG00000111907;ENSG00000101443;ENSG00000145779;ENSG00000162267;ENSG00000147257;ENSG00000103490;ENSG00000151655;ENSG00000123243;ENSG00000206072;ENSG00000163710;ENSG00000137752;ENSG00000103811;ENSG00000128040;ENSG00000125730;ENSG00000169031…	ENSG00000135919;ENSG00000122707;ENSG00000153113;ENSG00000089220;ENSG00000175899;ENSG00000106804;ENSG00000242550;ENSG00000139193;ENSG00000121552;ENSG00000133710;ENSG00000111907;ENSG00000101443;ENSG00000145779;ENSG00000162267;ENSG00000147257;ENSG00000103490;ENSG00000151655;ENSG00000123243;ENSG00000206072;ENSG00000163710;ENSG00000137752;ENSG00000103811;ENSG00000128040;ENSG00000125730;ENSG00000169031…	43	ENSG00000135919;ENSG00000175899;ENSG00000106804;ENSG00000242550;ENSG00000139193;ENSG00000121552;ENSG00000111907;ENSG00000101443;ENSG00000145779;ENSG00000162267;ENSG00000147257;ENSG00000103490;ENSG00000206072;ENSG00000137752;ENSG00000103811;ENSG00000128040;ENSG00000125730;ENSG00000169031;ENSG00000118503;ENSG00000145423;ENSG00000044574;ENSG00000166145;ENSG00000079257;ENSG00000114204;ENSG00000173714…	33	5270;2;727;5273;939;1475;7164;10406;25816;3699;2719;29108;89778;834;1512;6691;718;1285;7128;6423;3309;6692;56925;5276;124857;51176;10392;10653;5268;408;1800;4118;2876	33	ENSG00000135919;ENSG00000122707;ENSG00000153113;ENSG00000089220;ENSG00000175899;ENSG00000106804;ENSG00000242550;ENSG00000139193;ENSG00000121552;ENSG00000133710;ENSG00000111907;ENSG00000101443;ENSG00000145779;ENSG00000162267;ENSG00000147257;ENSG00000103490;ENSG00000151655;ENSG00000123243;ENSG00000206072;ENSG00000163710;ENSG00000137752;ENSG00000103811;ENSG00000128040;ENSG00000125730;ENSG00000169031…	43	ENSG00000122707;ENSG00000153113;ENSG00000089220;ENSG00000133710;ENSG00000151655;ENSG00000123243;ENSG00000163710;ENSG00000150938;ENSG00000003436;ENSG00000087250	10	8434;831;5037;11005;3698;80760;26577;51232;7035;4504	10
molecular function	peptidase inhibitor activity	GO:0030414	35	2	0.0019	SERPINE2;RECK;CAST;PEBP1;A2M;C5;SERPINB10;CD27;CSTA;SPINK5;WFDC2;TNFAIP8;ITIH3;GPC3;ITIH2;ITIH5;SERPINB11;SPINK2;C3;COL4A3;TNFAIP3;CRIM1;HSPA5;TFPI;SPINT1;LXN;SERPINI2;LEF1;WFIKKN2;SPINT2;ARRB1;SERPINB5;DPEP1;MT3;GPX1	5270;8434;831;5037;2;727;5273;939;1475;11005;10406;25816;3699;2719;3698;80760;89778;6691;718;1285;7128;51232;3309;7035;6692;56925;5276;51176;124857;10653;408;5268;1800;4504;2876	ENSG00000135919;ENSG00000122707;ENSG00000153113;ENSG00000089220;ENSG00000175899;ENSG00000106804;ENSG00000242550;ENSG00000139193;ENSG00000121552;ENSG00000133710;ENSG00000101443;ENSG00000145779;ENSG00000162267;ENSG00000147257;ENSG00000151655;ENSG00000123243;ENSG00000206072;ENSG00000128040;ENSG00000125730;ENSG00000169031;ENSG00000118503;ENSG00000150938;ENSG00000044574;ENSG00000003436;ENSG00000166145…	ENSG00000135919;ENSG00000122707;ENSG00000153113;ENSG00000089220;ENSG00000175899;ENSG00000106804;ENSG00000242550;ENSG00000139193;ENSG00000121552;ENSG00000133710;ENSG00000101443;ENSG00000145779;ENSG00000162267;ENSG00000147257;ENSG00000151655;ENSG00000123243;ENSG00000206072;ENSG00000128040;ENSG00000125730;ENSG00000169031;ENSG00000118503;ENSG00000150938;ENSG00000044574;ENSG00000003436;ENSG00000166145…	35	ENSG00000135919;ENSG00000175899;ENSG00000106804;ENSG00000242550;ENSG00000139193;ENSG00000121552;ENSG00000101443;ENSG00000145779;ENSG00000162267;ENSG00000147257;ENSG00000206072;ENSG00000128040;ENSG00000125730;ENSG00000169031;ENSG00000118503;ENSG00000044574;ENSG00000166145;ENSG00000079257;ENSG00000114204;ENSG00000138795;ENSG00000173714;ENSG00000167642;ENSG00000137486;ENSG00000206075;ENSG00000015413…	26	5270;2;727;5273;939;1475;10406;25816;3699;2719;89778;6691;718;1285;7128;3309;6692;56925;5276;51176;124857;10653;408;5268;1800;2876	26	ENSG00000135919;ENSG00000122707;ENSG00000153113;ENSG00000089220;ENSG00000175899;ENSG00000106804;ENSG00000242550;ENSG00000139193;ENSG00000121552;ENSG00000133710;ENSG00000101443;ENSG00000145779;ENSG00000162267;ENSG00000147257;ENSG00000151655;ENSG00000123243;ENSG00000206072;ENSG00000128040;ENSG00000125730;ENSG00000169031;ENSG00000118503;ENSG00000150938;ENSG00000044574;ENSG00000003436;ENSG00000166145…	35	ENSG00000122707;ENSG00000153113;ENSG00000089220;ENSG00000133710;ENSG00000151655;ENSG00000123243;ENSG00000150938;ENSG00000003436;ENSG00000087250	9	8434;831;5037;11005;3698;80760;51232;7035;4504	9
molecular function	endopeptidase inhibitor activity	GO:0004866	34	1.97	0.0022	SERPINE2;RECK;CAST;PEBP1;A2M;C5;SERPINB10;CD27;CSTA;SPINK5;WFDC2;TNFAIP8;ITIH3;ITIH2;ITIH5;SERPINB11;SPINK2;C3;COL4A3;TNFAIP3;CRIM1;HSPA5;TFPI;SPINT1;LXN;SERPINI2;LEF1;WFIKKN2;SPINT2;ARRB1;SERPINB5;DPEP1;MT3;GPX1	5270;8434;831;5037;2;727;5273;939;1475;11005;10406;25816;3699;3698;80760;89778;6691;718;1285;7128;51232;3309;7035;6692;56925;5276;51176;124857;10653;408;5268;1800;4504;2876	ENSG00000135919;ENSG00000122707;ENSG00000153113;ENSG00000089220;ENSG00000175899;ENSG00000106804;ENSG00000242550;ENSG00000139193;ENSG00000121552;ENSG00000133710;ENSG00000101443;ENSG00000145779;ENSG00000162267;ENSG00000151655;ENSG00000123243;ENSG00000206072;ENSG00000128040;ENSG00000125730;ENSG00000169031;ENSG00000118503;ENSG00000150938;ENSG00000044574;ENSG00000003436;ENSG00000166145;ENSG00000079257…	ENSG00000135919;ENSG00000122707;ENSG00000153113;ENSG00000089220;ENSG00000175899;ENSG00000106804;ENSG00000242550;ENSG00000139193;ENSG00000121552;ENSG00000133710;ENSG00000101443;ENSG00000145779;ENSG00000162267;ENSG00000151655;ENSG00000123243;ENSG00000206072;ENSG00000128040;ENSG00000125730;ENSG00000169031;ENSG00000118503;ENSG00000150938;ENSG00000044574;ENSG00000003436;ENSG00000166145;ENSG00000079257…	34	ENSG00000135919;ENSG00000175899;ENSG00000106804;ENSG00000242550;ENSG00000139193;ENSG00000121552;ENSG00000101443;ENSG00000145779;ENSG00000162267;ENSG00000206072;ENSG00000128040;ENSG00000125730;ENSG00000169031;ENSG00000118503;ENSG00000044574;ENSG00000166145;ENSG00000079257;ENSG00000114204;ENSG00000138795;ENSG00000173714;ENSG00000167642;ENSG00000137486;ENSG00000206075;ENSG00000015413;ENSG00000233276	25	5270;2;727;5273;939;1475;10406;25816;3699;89778;6691;718;1285;7128;3309;6692;56925;5276;51176;124857;10653;408;5268;1800;2876	25	ENSG00000135919;ENSG00000122707;ENSG00000153113;ENSG00000089220;ENSG00000175899;ENSG00000106804;ENSG00000242550;ENSG00000139193;ENSG00000121552;ENSG00000133710;ENSG00000101443;ENSG00000145779;ENSG00000162267;ENSG00000151655;ENSG00000123243;ENSG00000206072;ENSG00000128040;ENSG00000125730;ENSG00000169031;ENSG00000118503;ENSG00000150938;ENSG00000044574;ENSG00000003436;ENSG00000166145;ENSG00000079257…	34	ENSG00000122707;ENSG00000153113;ENSG00000089220;ENSG00000133710;ENSG00000151655;ENSG00000123243;ENSG00000150938;ENSG00000003436;ENSG00000087250	9	8434;831;5037;11005;3698;80760;51232;7035;4504	9
molecular function	endopeptidase regulator activity	GO:0061135	35	1.95	0.0022	SERPINE2;RECK;CAST;PEBP1;A2M;C5;SERPINB10;CD27;CSTA;SPINK5;WFDC2;TNFAIP8;ITIH3;ITIH2;ITIH5;SERPINB11;SPINK2;C3;COL4A3;TNFAIP3;SFRP2;CRIM1;HSPA5;TFPI;SPINT1;LXN;SERPINI2;LEF1;WFIKKN2;SPINT2;ARRB1;SERPINB5;DPEP1;MT3;GPX1	5270;8434;831;5037;2;727;5273;939;1475;11005;10406;25816;3699;3698;80760;89778;6691;718;1285;7128;6423;51232;3309;7035;6692;56925;5276;51176;124857;10653;408;5268;1800;4504;2876	ENSG00000135919;ENSG00000122707;ENSG00000153113;ENSG00000089220;ENSG00000175899;ENSG00000106804;ENSG00000242550;ENSG00000139193;ENSG00000121552;ENSG00000133710;ENSG00000101443;ENSG00000145779;ENSG00000162267;ENSG00000151655;ENSG00000123243;ENSG00000206072;ENSG00000128040;ENSG00000125730;ENSG00000169031;ENSG00000118503;ENSG00000145423;ENSG00000150938;ENSG00000044574;ENSG00000003436;ENSG00000166145…	ENSG00000135919;ENSG00000122707;ENSG00000153113;ENSG00000089220;ENSG00000175899;ENSG00000106804;ENSG00000242550;ENSG00000139193;ENSG00000121552;ENSG00000133710;ENSG00000101443;ENSG00000145779;ENSG00000162267;ENSG00000151655;ENSG00000123243;ENSG00000206072;ENSG00000128040;ENSG00000125730;ENSG00000169031;ENSG00000118503;ENSG00000145423;ENSG00000150938;ENSG00000044574;ENSG00000003436;ENSG00000166145…	35	ENSG00000135919;ENSG00000175899;ENSG00000106804;ENSG00000242550;ENSG00000139193;ENSG00000121552;ENSG00000101443;ENSG00000145779;ENSG00000162267;ENSG00000206072;ENSG00000128040;ENSG00000125730;ENSG00000169031;ENSG00000118503;ENSG00000145423;ENSG00000044574;ENSG00000166145;ENSG00000079257;ENSG00000114204;ENSG00000138795;ENSG00000173714;ENSG00000167642;ENSG00000137486;ENSG00000206075;ENSG00000015413…	26	5270;2;727;5273;939;1475;10406;25816;3699;89778;6691;718;1285;7128;6423;3309;6692;56925;5276;51176;124857;10653;408;5268;1800;2876	26	ENSG00000135919;ENSG00000122707;ENSG00000153113;ENSG00000089220;ENSG00000175899;ENSG00000106804;ENSG00000242550;ENSG00000139193;ENSG00000121552;ENSG00000133710;ENSG00000101443;ENSG00000145779;ENSG00000162267;ENSG00000151655;ENSG00000123243;ENSG00000206072;ENSG00000128040;ENSG00000125730;ENSG00000169031;ENSG00000118503;ENSG00000145423;ENSG00000150938;ENSG00000044574;ENSG00000003436;ENSG00000166145…	35	ENSG00000122707;ENSG00000153113;ENSG00000089220;ENSG00000133710;ENSG00000151655;ENSG00000123243;ENSG00000150938;ENSG00000003436;ENSG00000087250	9	8434;831;5037;11005;3698;80760;51232;7035;4504	9
molecular function	anion binding	GO:0043168	382	1.19	0.0022	HACL1;P2RY4;PYGM;AK7;ATP8A1;TAP1;S100A8;TUBE1;SEPT4;GCDH;OAT;KIFC1;MOK;IDO1;WEE1;TGFBR3;STYK1;CTGF;UBE2T;DNAH6;CKMT1A;ACSM1;SLC46A1;ATP13A3;RAB33A;DLD;SPEF2;RHOBTB3;MAK;RSPO1;PBK;BTK;MKI67;GIMAP6;AURKB;SMOC2;HCK;KATNAL2;MYH7B;MYH11;GNAI1;APOH;ENPP1;FBP1;NEK9;NOD2;DDX58;ALOX5AP;SELP;SLK;GLRB;PRKAA1;SLC1A1;BMP2K;ATP13A5;PDE6C;RAC2;CYR61;MCM5;TTK;NEK2;PRKG1;UBE2R2;EPHB3;CXCL13;PNP;CRYZ;FASN;KIF20B;S…	26061;5030;5837;122481;10396;6890;6279;51175;5414;2639;4942;3833;5891;3620;7465;7049;55359;1490;29089;1768;548596;116285;113235;79572;9363;1738;79925;22836;4117;284654;55872;695;4288;474344;9212;64094;3055;83473;57644;4629;2770;350;5167;2203;91754;64127;23586;241;6403;9748;2743;5562;6505;55589;344905;5146;5880;3491;4174;7272;4751;5592;54926;2049;10563;4860;1429;2194;9585;166378;8476;9517;6098;680…	ENSG00000131373;ENSG00000186912;ENSG00000068976;ENSG00000140057;ENSG00000124406;ENSG00000168394;ENSG00000143546;ENSG00000074935;ENSG00000108387;ENSG00000105607;ENSG00000065154;ENSG00000237649;ENSG00000080823;ENSG00000131203;ENSG00000166483;ENSG00000069702;ENSG00000060140;ENSG00000118523;ENSG00000077152;ENSG00000115423;ENSG00000223572;ENSG00000166743;ENSG00000076351;ENSG00000133657;ENSG00000134594…	ENSG00000131373;ENSG00000186912;ENSG00000068976;ENSG00000140057;ENSG00000124406;ENSG00000168394;ENSG00000143546;ENSG00000074935;ENSG00000108387;ENSG00000105607;ENSG00000065154;ENSG00000237649;ENSG00000080823;ENSG00000131203;ENSG00000166483;ENSG00000069702;ENSG00000060140;ENSG00000118523;ENSG00000077152;ENSG00000115423;ENSG00000223572;ENSG00000166743;ENSG00000076351;ENSG00000133657;ENSG00000134594…	382	ENSG00000186912;ENSG00000140057;ENSG00000124406;ENSG00000168394;ENSG00000143546;ENSG00000074935;ENSG00000108387;ENSG00000237649;ENSG00000080823;ENSG00000131203;ENSG00000060140;ENSG00000077152;ENSG00000115423;ENSG00000223572;ENSG00000076351;ENSG00000133657;ENSG00000152582;ENSG00000111837;ENSG00000169218;ENSG00000168078;ENSG00000010671;ENSG00000148773;ENSG00000133561;ENSG00000178999;ENSG00000101336…	220	5030;122481;10396;6890;6279;51175;5414;3833;5891;3620;55359;29089;1768;548596;113235;79572;79925;4117;284654;55872;695;4288;474344;9212;3055;83473;2203;64127;23586;241;6403;9748;5562;6505;55589;344905;5146;5880;4174;7272;4751;10563;4860;2194;9585;166378;9517;6098;6809;5873;56171;479;24137;5888;1633;6790;6713;1800;7222;64135;5294;6296;113675;21;523;22974;115361;115362;2322;5341;8564;29887;1767;464…	220	ENSG00000131373;ENSG00000186912;ENSG00000068976;ENSG00000140057;ENSG00000124406;ENSG00000168394;ENSG00000143546;ENSG00000074935;ENSG00000108387;ENSG00000105607;ENSG00000065154;ENSG00000237649;ENSG00000080823;ENSG00000131203;ENSG00000166483;ENSG00000069702;ENSG00000060140;ENSG00000118523;ENSG00000077152;ENSG00000115423;ENSG00000223572;ENSG00000166743;ENSG00000076351;ENSG00000133657;ENSG00000134594…	382	ENSG00000131373;ENSG00000068976;ENSG00000105607;ENSG00000065154;ENSG00000166483;ENSG00000069702;ENSG00000118523;ENSG00000115423;ENSG00000166743;ENSG00000134594;ENSG00000091140;ENSG00000164292;ENSG00000112562;ENSG00000078814;ENSG00000133392;ENSG00000127955;ENSG00000091583;ENSG00000197594;ENSG00000119638;ENSG00000109738;ENSG00000142871;ENSG00000185532;ENSG00000107341;ENSG00000182580;ENSG00000116791…	163	26061;5837;2639;4942;7465;7049;1490;1768;116285;9363;1738;22836;64094;57644;4629;2770;350;5167;91754;2743;3491;5592;54926;2049;1429;8476;51422;9982;37;2045;84532;1842;10058;4882;5037;5166;4921;9362;84883;5139;9372;80224;23011;65266;5149;1289;55582;4620;91807;6594;84451;5066;10468;348980;27314;91404;390110;50808;79659;10536;23001;140609;205;55288;5834;6687;79611;36;5352;2775;6259;55811;345651;6583…	163
molecular function	receptor binding	GO:0005102	189	1.3	0.0026	HACL1;PLXNC1;CCL19;CD40LG;CD3E;PPARGC1B;MFGE8;ITGB1BP2;TAP1;S100A8;GATA3;HDGFRP3;IL18;FGG;CCNB1;IL1A;DNER;CCNE1;CMTM6;ANGPTL2;IL12A;PCNA;LAMA3;TGFBR3;CTGF;DLL1;MANF;MMP13;PGR;INSL5;GDF9;LAMA4;C3;ITGB7;COL4A3;RSPO1;IL2;DDO;TNFSF10;KCNA5;VEGFA;NTS;GNA14;GNAI1;CXADR;ITGB2;CXCL5;ENPP1;LEF1;BAMBI;WIPI1;IL8;OGN;FGF7;DPP4;VCAM1;GRN;SHC4;SERPINE2;CD3G;OPHN1;C5;TNFSF8;ITGB5;COL3A1;MARCH8;FAM3D;CYR61;PDZK1…	26061;10154;6363;959;916;133522;4240;26548;6890;6279;2625;50810;3606;2266;891;3552;92737;898;54918;23452;3592;5111;3909;7049;1490;28514;7873;4322;5241;10022;2661;3910;718;3695;1285;284654;3558;8528;8743;3741;7422;4922;9630;2770;1525;3689;6374;5167;51176;25805;55062;3576;4969;2252;1803;7412;2896;399694;5270;917;4983;727;944;3693;1281;220972;131177;3491;5174;7043;92304;3913;50852;4040;23426;27020;8…	ENSG00000131373;ENSG00000136040;ENSG00000172724;ENSG00000102245;ENSG00000198851;ENSG00000155846;ENSG00000140545;ENSG00000147166;ENSG00000168394;ENSG00000143546;ENSG00000107485;ENSG00000166503;ENSG00000150782;ENSG00000171557;ENSG00000134057;ENSG00000115008;ENSG00000187957;ENSG00000105173;ENSG00000091317;ENSG00000136859;ENSG00000168811;ENSG00000132646;ENSG00000053747;ENSG00000069702;ENSG00000118523…	ENSG00000131373;ENSG00000136040;ENSG00000172724;ENSG00000102245;ENSG00000198851;ENSG00000155846;ENSG00000140545;ENSG00000147166;ENSG00000168394;ENSG00000143546;ENSG00000107485;ENSG00000166503;ENSG00000150782;ENSG00000171557;ENSG00000134057;ENSG00000115008;ENSG00000187957;ENSG00000105173;ENSG00000091317;ENSG00000136859;ENSG00000168811;ENSG00000132646;ENSG00000053747;ENSG00000069702;ENSG00000118523…	189	ENSG00000136040;ENSG00000172724;ENSG00000102245;ENSG00000198851;ENSG00000168394;ENSG00000143546;ENSG00000107485;ENSG00000150782;ENSG00000171557;ENSG00000134057;ENSG00000115008;ENSG00000105173;ENSG00000091317;ENSG00000168811;ENSG00000132646;ENSG00000053747;ENSG00000198719;ENSG00000145050;ENSG00000137745;ENSG00000082175;ENSG00000172410;ENSG00000125730;ENSG00000139626;ENSG00000169031;ENSG00000169218…	112	10154;6363;959;916;6890;6279;2625;3606;2266;891;3552;898;54918;3592;5111;3909;28514;7873;4322;5241;10022;718;3695;1285;284654;3558;8743;7422;4922;1525;3689;6374;51176;3576;2252;7412;2896;5270;917;727;944;220972;131177;5174;92304;50852;89780;10563;11001;6342;154;971;55600;29760;10068;4843;2267;5294;5741;3600;6375;336;6288;4067;1794;3371;2022;3902;3557;6863;841;3694;149233;4645;3872;6423;1081;56253…	112	ENSG00000131373;ENSG00000136040;ENSG00000172724;ENSG00000102245;ENSG00000198851;ENSG00000155846;ENSG00000140545;ENSG00000147166;ENSG00000168394;ENSG00000143546;ENSG00000107485;ENSG00000166503;ENSG00000150782;ENSG00000171557;ENSG00000134057;ENSG00000115008;ENSG00000187957;ENSG00000105173;ENSG00000091317;ENSG00000136859;ENSG00000168811;ENSG00000132646;ENSG00000053747;ENSG00000069702;ENSG00000118523…	189	ENSG00000131373;ENSG00000155846;ENSG00000140545;ENSG00000147166;ENSG00000166503;ENSG00000187957;ENSG00000136859;ENSG00000069702;ENSG00000118523;ENSG00000164404;ENSG00000112769;ENSG00000203797;ENSG00000130037;ENSG00000156049;ENSG00000127955;ENSG00000197594;ENSG00000095739;ENSG00000070540;ENSG00000106809;ENSG00000197635;ENSG00000185634;ENSG00000079482;ENSG00000082781;ENSG00000168542;ENSG00000142871…	77	26061;133522;4240;26548;50810;92737;23452;7049;1490;2661;3910;8528;3741;9630;2770;5167;25805;55062;4969;1803;399694;4983;3693;1281;3491;7043;3913;4040;23426;27020;8204;3624;9655;9455;9068;8613;2069;2045;2099;1842;10580;5037;7148;4856;6013;182;1289;338872;4878;2257;7481;9365;133;23710;9966;5764;11162;57088;9324;88;27286;9472;3696;4852;7424;10516;2247;3623;8471;8823;54360;185;8425;2775;81029;6259;5…	77
molecular function	vitamin binding	GO:0019842	37	1.88	0.003	HACL1;SDSL;PYGM;LEPREL1;MARC2;OAT;ACCSL;SGPL1;SLC19A3;AADAT;GOT2;SLC46A1;SHMT2;GOT1;EGLN3;TTPA;TMLHE;SHMT1;PSAT1;LEPREL2;FASN;KL;SPTLC2;FOLR1;PYGB;RBP4;MTHFS;PLOD2;KYNU;P4HA2;ALDH1A2;P4HA3;PAM;SEPSECS;TCN1;CRABP1;HDC	26061;113675;5837;55214;54996;4942;390110;8879;80704;51166;2806;113235;6472;2805;112399;7274;55217;6470;29968;10536;2194;9365;9517;2348;5834;5950;10588;5352;8942;8974;8854;283208;5066;51091;6947;1381;3067	ENSG00000131373;ENSG00000139410;ENSG00000068976;ENSG00000090530;ENSG00000117791;ENSG00000065154;ENSG00000205126;ENSG00000166224;ENSG00000135917;ENSG00000109576;ENSG00000125166;ENSG00000076351;ENSG00000182199;ENSG00000120053;ENSG00000129521;ENSG00000137561;ENSG00000185973;ENSG00000176974;ENSG00000135069;ENSG00000110811;ENSG00000169710;ENSG00000133116;ENSG00000100596;ENSG00000110195;ENSG00000100994…	ENSG00000131373;ENSG00000139410;ENSG00000068976;ENSG00000090530;ENSG00000117791;ENSG00000065154;ENSG00000205126;ENSG00000166224;ENSG00000135917;ENSG00000109576;ENSG00000125166;ENSG00000076351;ENSG00000182199;ENSG00000120053;ENSG00000129521;ENSG00000137561;ENSG00000185973;ENSG00000176974;ENSG00000135069;ENSG00000110811;ENSG00000169710;ENSG00000133116;ENSG00000100596;ENSG00000110195;ENSG00000100994…	37	ENSG00000139410;ENSG00000166224;ENSG00000135917;ENSG00000076351;ENSG00000182199;ENSG00000176974;ENSG00000135069;ENSG00000169710;ENSG00000100596;ENSG00000110195;ENSG00000136371;ENSG00000115919;ENSG00000149380;ENSG00000109618;ENSG00000134827;ENSG00000166426;ENSG00000140287	17	113675;8879;80704;113235;6472;6470;29968;2194;9517;2348;10588;8942;283208;51091;6947;1381;3067	17	ENSG00000131373;ENSG00000139410;ENSG00000068976;ENSG00000090530;ENSG00000117791;ENSG00000065154;ENSG00000205126;ENSG00000166224;ENSG00000135917;ENSG00000109576;ENSG00000125166;ENSG00000076351;ENSG00000182199;ENSG00000120053;ENSG00000129521;ENSG00000137561;ENSG00000185973;ENSG00000176974;ENSG00000135069;ENSG00000110811;ENSG00000169710;ENSG00000133116;ENSG00000100596;ENSG00000110195;ENSG00000100994…	37	ENSG00000131373;ENSG00000068976;ENSG00000090530;ENSG00000117791;ENSG00000065154;ENSG00000205126;ENSG00000109576;ENSG00000125166;ENSG00000120053;ENSG00000129521;ENSG00000137561;ENSG00000185973;ENSG00000110811;ENSG00000133116;ENSG00000100994;ENSG00000138207;ENSG00000152952;ENSG00000072682;ENSG00000128918;ENSG00000145730	20	26061;5837;55214;54996;4942;390110;51166;2806;2805;112399;7274;55217;10536;9365;5834;5950;5352;8974;8854;5066	20
molecular function	calcium ion binding	GO:0005509	102	1.42	0.0042	LTBP1;REPS2;RYR1;S100A11;LPCAT2;SLC25A13;ITGB1BP2;CIB2;S100A8;CPNE6;DNER;RGN;FSTL5;SCIN;RAB11FIP3;RCN1;FKBP9;JAG1;DLL1;EDEM1;S100P;EFCAB3;PLCL2;MMP13;RASGRP1;CAPN9;GCA;SGCE;HSPA5;CBLB;MMP1;EFHC1;SMOC2;PON1;EFHA2;LCP1;SGCA;PKD2L2;FSTL1;CCBE1;MMP8;STAT1;ANXA9;WDR66;TNNC1;KCNIP4;PLSCR4;SNTN;LRP2;DNASE1L3;SLC25A12;SULF1;EFCAB4B;CASQ2;ACTN2;THBS3;PPP2R3A;MAN1A1;MYLPF;ANKRD5;EFHB;NECAB3;SPARC;PLCD4;EFC…	4052;9185;6261;6282;54947;10165;26548;10518;6279;9362;92737;9104;56884;85477;9727;5954;11328;182;28514;9695;6286;146779;23228;4322;10125;10753;25801;8910;3309;868;4312;114327;64094;5444;286097;3936;6442;27039;11167;147372;4317;6772;8416;144406;7134;80333;57088;132203;4036;1776;8604;23213;84766;845;88;7059;5523;4121;29895;63926;151651;63941;6678;84812;79645;57402;92291;30819;5551;6280;54798;4951;1…	ENSG00000049323;ENSG00000169891;ENSG00000196218;ENSG00000163191;ENSG00000087253;ENSG00000004864;ENSG00000147166;ENSG00000136425;ENSG00000143546;ENSG00000100884;ENSG00000187957;ENSG00000130988;ENSG00000168843;ENSG00000006747;ENSG00000090565;ENSG00000049449;ENSG00000122642;ENSG00000101384;ENSG00000198719;ENSG00000134109;ENSG00000163993;ENSG00000172421;ENSG00000154822;ENSG00000137745;ENSG00000172575…	ENSG00000049323;ENSG00000169891;ENSG00000196218;ENSG00000163191;ENSG00000087253;ENSG00000004864;ENSG00000147166;ENSG00000136425;ENSG00000143546;ENSG00000100884;ENSG00000187957;ENSG00000130988;ENSG00000168843;ENSG00000006747;ENSG00000090565;ENSG00000049449;ENSG00000122642;ENSG00000101384;ENSG00000198719;ENSG00000134109;ENSG00000163993;ENSG00000172421;ENSG00000154822;ENSG00000137745;ENSG00000172575…	102	ENSG00000169891;ENSG00000163191;ENSG00000087253;ENSG00000004864;ENSG00000143546;ENSG00000168843;ENSG00000006747;ENSG00000198719;ENSG00000134109;ENSG00000163993;ENSG00000154822;ENSG00000137745;ENSG00000172575;ENSG00000135773;ENSG00000115271;ENSG00000044574;ENSG00000114423;ENSG00000196611;ENSG00000096093;ENSG00000005421;ENSG00000136167;ENSG00000183287;ENSG00000115415;ENSG00000143412;ENSG00000158023…	52	9185;6282;54947;10165;6279;56884;85477;28514;9695;6286;23228;4322;10125;10753;25801;3309;868;4312;114327;5444;3936;147372;6772;8416;144406;80333;132203;4036;1776;84766;4121;63926;151651;79645;57402;92291;5551;6280;4951;5359;6775;5357;2201;5320;133690;2591;6708;23075;716;127795;9833;84698	52	ENSG00000049323;ENSG00000169891;ENSG00000196218;ENSG00000163191;ENSG00000087253;ENSG00000004864;ENSG00000147166;ENSG00000136425;ENSG00000143546;ENSG00000100884;ENSG00000187957;ENSG00000130988;ENSG00000168843;ENSG00000006747;ENSG00000090565;ENSG00000049449;ENSG00000122642;ENSG00000101384;ENSG00000198719;ENSG00000134109;ENSG00000163993;ENSG00000172421;ENSG00000154822;ENSG00000137745;ENSG00000172575…	102	ENSG00000049323;ENSG00000196218;ENSG00000147166;ENSG00000136425;ENSG00000100884;ENSG00000187957;ENSG00000130988;ENSG00000090565;ENSG00000049449;ENSG00000122642;ENSG00000101384;ENSG00000172421;ENSG00000127990;ENSG00000112562;ENSG00000155970;ENSG00000108823;ENSG00000078795;ENSG00000163430;ENSG00000118113;ENSG00000114854;ENSG00000114698;ENSG00000115840;ENSG00000137573;ENSG00000118729;ENSG00000077522…	50	4052;6261;26548;10518;9362;92737;9104;9727;5954;11328;182;146779;8910;64094;286097;6442;27039;11167;4317;7134;57088;8604;23213;845;88;7059;5523;29895;63941;6678;84812;30819;54798;10516;1373;10893;54704;6262;55288;57493;170392;8425;2200;1462;2195;11131;5311;8404;1000;4325	50
molecular function	heparin binding	GO:0008201	31	1.95	0.0042	FGFR4;CXCL13;SERPINE2;RSPO1;FGF2;SELP;LIPH;FGF12;TNXB;SELL;ADAMTS1;THBS3;SMOC2;VEGFA;LIPC;PTPRC;APOH;TGFBR3;CTGF;FSTL1;POSTN;CYR61;FGFBP1;COL13A1;NDNF;COL5A1;FGF7;LPL;PCOLCE2;ECM2;PTN	2264;10563;5270;284654;2247;6403;200879;2257;7148;6402;9510;7059;64094;7422;3990;5788;350;7049;1490;11167;10631;3491;9982;1305;79625;1289;2252;4023;26577;1842;5764	ENSG00000160867;ENSG00000156234;ENSG00000135919;ENSG00000169218;ENSG00000138685;ENSG00000174175;ENSG00000163898;ENSG00000114279;ENSG00000168477;ENSG00000188404;ENSG00000154734;ENSG00000169231;ENSG00000112562;ENSG00000112715;ENSG00000166035;ENSG00000081237;ENSG00000091583;ENSG00000069702;ENSG00000118523;ENSG00000163430;ENSG00000133110;ENSG00000142871;ENSG00000137440;ENSG00000197467;ENSG00000173376…	ENSG00000160867;ENSG00000156234;ENSG00000135919;ENSG00000169218;ENSG00000138685;ENSG00000174175;ENSG00000163898;ENSG00000114279;ENSG00000168477;ENSG00000188404;ENSG00000154734;ENSG00000169231;ENSG00000112562;ENSG00000112715;ENSG00000166035;ENSG00000081237;ENSG00000091583;ENSG00000069702;ENSG00000118523;ENSG00000163430;ENSG00000133110;ENSG00000142871;ENSG00000137440;ENSG00000197467;ENSG00000173376…	31	ENSG00000160867;ENSG00000156234;ENSG00000135919;ENSG00000169218;ENSG00000174175;ENSG00000163898;ENSG00000188404;ENSG00000112715;ENSG00000166035;ENSG00000081237;ENSG00000133110;ENSG00000173376;ENSG00000140285;ENSG00000175445	14	2264;10563;5270;284654;6403;200879;6402;7422;3990;5788;10631;79625;2252;4023	14	ENSG00000160867;ENSG00000156234;ENSG00000135919;ENSG00000169218;ENSG00000138685;ENSG00000174175;ENSG00000163898;ENSG00000114279;ENSG00000168477;ENSG00000188404;ENSG00000154734;ENSG00000169231;ENSG00000112562;ENSG00000112715;ENSG00000166035;ENSG00000081237;ENSG00000091583;ENSG00000069702;ENSG00000118523;ENSG00000163430;ENSG00000133110;ENSG00000142871;ENSG00000137440;ENSG00000197467;ENSG00000173376…	31	ENSG00000138685;ENSG00000114279;ENSG00000168477;ENSG00000154734;ENSG00000169231;ENSG00000112562;ENSG00000091583;ENSG00000069702;ENSG00000118523;ENSG00000163430;ENSG00000142871;ENSG00000137440;ENSG00000197467;ENSG00000130635;ENSG00000163710;ENSG00000106823;ENSG00000105894	17	2247;2257;7148;9510;7059;64094;350;7049;1490;11167;3491;9982;1305;1289;26577;1842;5764	17
molecular function	structural constituent of muscle	GO:0008307	17	2.5	0.0047	MYH7;JPH1;ACTN2;MYOT;SORBS2;MYOM1;MYBPC3;MYH11;CSRP3;MYBPH;PDLIM3;SYNM;MYLPF;TCAP;MYOM2;TPM1;MYH2	4625;56704;88;9499;8470;8736;4607;4629;8048;4608;27295;23336;29895;8557;9172;7168;4620	ENSG00000092054;ENSG00000104369;ENSG00000077522;ENSG00000120729;ENSG00000154556;ENSG00000101605;ENSG00000134571;ENSG00000133392;ENSG00000129170;ENSG00000133055;ENSG00000154553;ENSG00000182253;ENSG00000180209;ENSG00000173991;ENSG00000036448;ENSG00000140416;ENSG00000125414	ENSG00000092054;ENSG00000104369;ENSG00000077522;ENSG00000120729;ENSG00000154556;ENSG00000101605;ENSG00000134571;ENSG00000133392;ENSG00000129170;ENSG00000133055;ENSG00000154553;ENSG00000182253;ENSG00000180209;ENSG00000173991;ENSG00000036448;ENSG00000140416;ENSG00000125414	17	ENSG00000133055	1	4608	1	ENSG00000092054;ENSG00000104369;ENSG00000077522;ENSG00000120729;ENSG00000154556;ENSG00000101605;ENSG00000134571;ENSG00000133392;ENSG00000129170;ENSG00000133055;ENSG00000154553;ENSG00000182253;ENSG00000180209;ENSG00000173991;ENSG00000036448;ENSG00000140416;ENSG00000125414	17	ENSG00000092054;ENSG00000104369;ENSG00000077522;ENSG00000120729;ENSG00000154556;ENSG00000101605;ENSG00000134571;ENSG00000133392;ENSG00000129170;ENSG00000154553;ENSG00000182253;ENSG00000180209;ENSG00000173991;ENSG00000036448;ENSG00000140416;ENSG00000125414	16	4625;56704;88;9499;8470;8736;4607;4629;8048;27295;23336;29895;8557;9172;7168;4620	16
molecular function	MHC class II receptor activity	GO:0032395	6	4.41	0.0076	HLA-DRA;KRT17;HLA-DPA1;HLA-DQA1;HLA-DOB;HLA-DQB2	3122;3872;3113;3117;3112;3120	ENSG00000204287;ENSG00000128422;ENSG00000231389;ENSG00000196735;ENSG00000241106;ENSG00000232629	ENSG00000204287;ENSG00000128422;ENSG00000231389;ENSG00000196735;ENSG00000241106;ENSG00000232629	6	ENSG00000204287;ENSG00000128422;ENSG00000231389;ENSG00000196735;ENSG00000241106;ENSG00000232629	6	3122;3872;3113;3117;3112;3120	6	ENSG00000204287;ENSG00000128422;ENSG00000231389;ENSG00000196735;ENSG00000241106;ENSG00000232629	6		0		0
molecular function	passive transmembrane transporter activity	GO:0022803	65	1.51	0.0123	KCNMB1;RYR1;MS4A2;TRPM6;AQP1;CLCC1;SLC9C2;STX1B;CLIC2;ABCC8;AQP2;TRPV2;GJB1;KCNAB1;KCNS3;TRPC1;CLIC1;KCNK2;TMEM37;SCN2A;AQP8;GPM6A;KCNK10;KCNH5;GJB2;KCNA5;KCNH2;KCNE3;PKD2L2;TPTE2;KCNK1;MAL;HCN1;SLC4A11;KCNIP4;SCN5A;CHRNA9;GLRB;MIP;PIEZO2;PLLP;MCOLN2;LRRC55;GABRR1;HVCN1;CHRNB3;CACNB2;GABRP;AQP4;FXYD5;KCNIP2;PRF1;SCN7A;NOX1;P2RX4;FGF2;KCNJ8;PANX3;KCNMA1;RYR2;CACNB1;PKD2;ITGAV;TRPC3;CACNA2D1	3779;6261;2206;140803;358;23155;284525;112755;1193;6833;359;51393;2705;7881;3790;7220;1192;3776;140738;6326;343;2823;54207;27133;2706;3741;3757;10008;27039;93492;3775;4118;348980;83959;80333;6331;55584;2743;4284;63895;51090;255231;219527;2569;84329;1142;783;2568;361;53827;30819;5551;6332;27035;5025;2247;3764;116337;3778;6262;782;5311;3685;7222;781	ENSG00000145936;ENSG00000196218;ENSG00000149534;ENSG00000119121;ENSG00000240583;ENSG00000121940;ENSG00000162753;ENSG00000099365;ENSG00000155962;ENSG00000006071;ENSG00000167580;ENSG00000187688;ENSG00000169562;ENSG00000169282;ENSG00000170745;ENSG00000144935;ENSG00000213719;ENSG00000082482;ENSG00000171227;ENSG00000136531;ENSG00000103375;ENSG00000150625;ENSG00000100433;ENSG00000140015;ENSG00000165474…	ENSG00000145936;ENSG00000196218;ENSG00000149534;ENSG00000119121;ENSG00000240583;ENSG00000121940;ENSG00000162753;ENSG00000099365;ENSG00000155962;ENSG00000006071;ENSG00000167580;ENSG00000187688;ENSG00000169562;ENSG00000169282;ENSG00000170745;ENSG00000144935;ENSG00000213719;ENSG00000082482;ENSG00000171227;ENSG00000136531;ENSG00000103375;ENSG00000150625;ENSG00000100433;ENSG00000140015;ENSG00000165474…	65	ENSG00000149534;ENSG00000119121;ENSG00000155962;ENSG00000167580;ENSG00000187688;ENSG00000169562;ENSG00000170745;ENSG00000213719;ENSG00000082482;ENSG00000171227;ENSG00000103375;ENSG00000165474;ENSG00000135750;ENSG00000172005;ENSG00000088836;ENSG00000185774;ENSG00000174343;ENSG00000154864;ENSG00000102934;ENSG00000153898;ENSG00000183908;ENSG00000122986;ENSG00000094755;ENSG00000171885;ENSG00000089327…	29	2206;140803;1193;359;51393;2705;3790;1192;3776;140738;343;2706;3775;4118;83959;80333;55584;63895;51090;255231;219527;84329;2568;361;53827;5551;27035;5025;7222	29	ENSG00000145936;ENSG00000196218;ENSG00000149534;ENSG00000119121;ENSG00000240583;ENSG00000121940;ENSG00000162753;ENSG00000099365;ENSG00000155962;ENSG00000006071;ENSG00000167580;ENSG00000187688;ENSG00000169562;ENSG00000169282;ENSG00000170745;ENSG00000144935;ENSG00000213719;ENSG00000082482;ENSG00000171227;ENSG00000136531;ENSG00000103375;ENSG00000150625;ENSG00000100433;ENSG00000140015;ENSG00000165474…	65	ENSG00000145936;ENSG00000196218;ENSG00000240583;ENSG00000121940;ENSG00000162753;ENSG00000099365;ENSG00000006071;ENSG00000169282;ENSG00000144935;ENSG00000136531;ENSG00000150625;ENSG00000100433;ENSG00000140015;ENSG00000130037;ENSG00000055118;ENSG00000175538;ENSG00000078795;ENSG00000132958;ENSG00000164588;ENSG00000183873;ENSG00000109738;ENSG00000135517;ENSG00000146276;ENSG00000147432;ENSG00000165995…	36	3779;6261;358;23155;284525;112755;6833;7881;7220;6326;2823;54207;27133;3741;3757;10008;27039;93492;348980;6331;2743;4284;2569;1142;783;30819;6332;2247;3764;116337;3778;6262;782;5311;3685;781	36
molecular function	channel activity	GO:0015267	65	1.51	0.0123	KCNMB1;RYR1;MS4A2;TRPM6;AQP1;CLCC1;SLC9C2;STX1B;CLIC2;ABCC8;AQP2;TRPV2;GJB1;KCNAB1;KCNS3;TRPC1;CLIC1;KCNK2;TMEM37;SCN2A;AQP8;GPM6A;KCNK10;KCNH5;GJB2;KCNA5;KCNH2;KCNE3;PKD2L2;TPTE2;KCNK1;MAL;HCN1;SLC4A11;KCNIP4;SCN5A;CHRNA9;GLRB;MIP;PIEZO2;PLLP;MCOLN2;LRRC55;GABRR1;HVCN1;CHRNB3;CACNB2;GABRP;AQP4;FXYD5;KCNIP2;PRF1;SCN7A;NOX1;P2RX4;FGF2;KCNJ8;PANX3;KCNMA1;RYR2;CACNB1;PKD2;ITGAV;TRPC3;CACNA2D1	3779;6261;2206;140803;358;23155;284525;112755;1193;6833;359;51393;2705;7881;3790;7220;1192;3776;140738;6326;343;2823;54207;27133;2706;3741;3757;10008;27039;93492;3775;4118;348980;83959;80333;6331;55584;2743;4284;63895;51090;255231;219527;2569;84329;1142;783;2568;361;53827;30819;5551;6332;27035;5025;2247;3764;116337;3778;6262;782;5311;3685;7222;781	ENSG00000145936;ENSG00000196218;ENSG00000149534;ENSG00000119121;ENSG00000240583;ENSG00000121940;ENSG00000162753;ENSG00000099365;ENSG00000155962;ENSG00000006071;ENSG00000167580;ENSG00000187688;ENSG00000169562;ENSG00000169282;ENSG00000170745;ENSG00000144935;ENSG00000213719;ENSG00000082482;ENSG00000171227;ENSG00000136531;ENSG00000103375;ENSG00000150625;ENSG00000100433;ENSG00000140015;ENSG00000165474…	ENSG00000145936;ENSG00000196218;ENSG00000149534;ENSG00000119121;ENSG00000240583;ENSG00000121940;ENSG00000162753;ENSG00000099365;ENSG00000155962;ENSG00000006071;ENSG00000167580;ENSG00000187688;ENSG00000169562;ENSG00000169282;ENSG00000170745;ENSG00000144935;ENSG00000213719;ENSG00000082482;ENSG00000171227;ENSG00000136531;ENSG00000103375;ENSG00000150625;ENSG00000100433;ENSG00000140015;ENSG00000165474…	65	ENSG00000149534;ENSG00000119121;ENSG00000155962;ENSG00000167580;ENSG00000187688;ENSG00000169562;ENSG00000170745;ENSG00000213719;ENSG00000082482;ENSG00000171227;ENSG00000103375;ENSG00000165474;ENSG00000135750;ENSG00000172005;ENSG00000088836;ENSG00000185774;ENSG00000174343;ENSG00000154864;ENSG00000102934;ENSG00000153898;ENSG00000183908;ENSG00000122986;ENSG00000094755;ENSG00000171885;ENSG00000089327…	29	2206;140803;1193;359;51393;2705;3790;1192;3776;140738;343;2706;3775;4118;83959;80333;55584;63895;51090;255231;219527;84329;2568;361;53827;5551;27035;5025;7222	29	ENSG00000145936;ENSG00000196218;ENSG00000149534;ENSG00000119121;ENSG00000240583;ENSG00000121940;ENSG00000162753;ENSG00000099365;ENSG00000155962;ENSG00000006071;ENSG00000167580;ENSG00000187688;ENSG00000169562;ENSG00000169282;ENSG00000170745;ENSG00000144935;ENSG00000213719;ENSG00000082482;ENSG00000171227;ENSG00000136531;ENSG00000103375;ENSG00000150625;ENSG00000100433;ENSG00000140015;ENSG00000165474…	65	ENSG00000145936;ENSG00000196218;ENSG00000240583;ENSG00000121940;ENSG00000162753;ENSG00000099365;ENSG00000006071;ENSG00000169282;ENSG00000144935;ENSG00000136531;ENSG00000150625;ENSG00000100433;ENSG00000140015;ENSG00000130037;ENSG00000055118;ENSG00000175538;ENSG00000078795;ENSG00000132958;ENSG00000164588;ENSG00000183873;ENSG00000109738;ENSG00000135517;ENSG00000146276;ENSG00000147432;ENSG00000165995…	36	3779;6261;358;23155;284525;112755;6833;7881;7220;6326;2823;54207;27133;3741;3757;10008;27039;93492;348980;6331;2743;4284;2569;1142;783;30819;6332;2247;3764;116337;3778;6262;782;5311;3685;781	36
molecular function	identical protein binding	GO:0042802	144	1.3	0.0123	HACL1;LCN2;CRYM;TAP1;EXT1;IKZF2;PCNA;AADAT;CD247;SFTPC;CLDN4;TRIP13;TXNRD2;GZMA;BTK;HOOK3;VEGFA;PON1;TYSND1;MGST1;LCP1;CXADR;ENPP1;HHEX;GGCT;KYNU;ACSL6;XPNPEP1;DPP4;CHEK2;MTUS2;VWA2;DDX58;TNNC1;MCM6;ALOX5AP;SLK;ADIPOR2;CASQ2;GPSM2;GABRR1;KCNRG;PYCARD;TGFB3;TIMELESS;LRP6;KCNIP2;MYOCD;CLDN7;INHBA;FTL;MYH7;ATPIF1;HOMER2;RYR2;CDC42BPA;ADRB2;CPT1A;ROPN1B;MBIP;RAD51;DCK;NFKBIA;DGAT2;COL1A2;ESR1;NOS2;GA…	26061;3934;1428;6890;2131;22807;5111;51166;919;6440;1364;9319;10587;3001;695;84376;7422;5444;219743;4257;3936;1525;5167;3087;79017;8942;23305;7511;1803;11200;23281;340706;23586;7134;4175;241;9748;79602;845;29899;2569;283518;29108;7043;8914;4040;30819;93649;1366;3624;2512;4625;93974;9455;6262;8476;154;1374;152015;51562;5888;1633;4792;84649;1278;2099;4843;2582;7122;54585;6282;6375;4882;336;7299;946…	ENSG00000131373;ENSG00000148346;ENSG00000103316;ENSG00000168394;ENSG00000182197;ENSG00000030419;ENSG00000132646;ENSG00000109576;ENSG00000198821;ENSG00000168484;ENSG00000189143;ENSG00000071539;ENSG00000184470;ENSG00000145649;ENSG00000010671;ENSG00000168172;ENSG00000112715;ENSG00000005421;ENSG00000156521;ENSG00000008394;ENSG00000136167;ENSG00000154639;ENSG00000197594;ENSG00000152804;ENSG00000006625…	ENSG00000131373;ENSG00000148346;ENSG00000103316;ENSG00000168394;ENSG00000182197;ENSG00000030419;ENSG00000132646;ENSG00000109576;ENSG00000198821;ENSG00000168484;ENSG00000189143;ENSG00000071539;ENSG00000184470;ENSG00000145649;ENSG00000010671;ENSG00000168172;ENSG00000112715;ENSG00000005421;ENSG00000156521;ENSG00000008394;ENSG00000136167;ENSG00000154639;ENSG00000197594;ENSG00000152804;ENSG00000006625…	144	ENSG00000148346;ENSG00000103316;ENSG00000168394;ENSG00000030419;ENSG00000132646;ENSG00000198821;ENSG00000168484;ENSG00000189143;ENSG00000071539;ENSG00000145649;ENSG00000010671;ENSG00000168172;ENSG00000112715;ENSG00000005421;ENSG00000156521;ENSG00000008394;ENSG00000136167;ENSG00000154639;ENSG00000152804;ENSG00000006625;ENSG00000115919;ENSG00000108039;ENSG00000183765;ENSG00000165816;ENSG00000107201…	85	3934;1428;6890;22807;5111;919;6440;1364;9319;3001;695;84376;7422;5444;219743;4257;3936;1525;3087;79017;8942;7511;11200;340706;23586;4175;241;9748;79602;283518;29108;8914;1366;2512;154;152015;51562;5888;1633;4792;84649;4843;2582;7122;6282;6375;336;2322;3162;9073;2022;5341;2705;11151;3998;841;124404;25801;7069;341359;22806;6772;8416;9076;81502;7164;914;2937;84888;7153;144455;1075;27111;7020;6472;51…	85	ENSG00000131373;ENSG00000148346;ENSG00000103316;ENSG00000168394;ENSG00000182197;ENSG00000030419;ENSG00000132646;ENSG00000109576;ENSG00000198821;ENSG00000168484;ENSG00000189143;ENSG00000071539;ENSG00000184470;ENSG00000145649;ENSG00000010671;ENSG00000168172;ENSG00000112715;ENSG00000005421;ENSG00000156521;ENSG00000008394;ENSG00000136167;ENSG00000154639;ENSG00000197594;ENSG00000152804;ENSG00000006625…	144	ENSG00000131373;ENSG00000182197;ENSG00000109576;ENSG00000184470;ENSG00000197594;ENSG00000164398;ENSG00000197635;ENSG00000132938;ENSG00000114854;ENSG00000118729;ENSG00000121957;ENSG00000146276;ENSG00000119699;ENSG00000070018;ENSG00000120049;ENSG00000141052;ENSG00000122641;ENSG00000092054;ENSG00000130770;ENSG00000103942;ENSG00000198626;ENSG00000143776;ENSG00000110090;ENSG00000164692;ENSG00000091831…	59	26061;2131;51166;10587;5167;23305;1803;23281;7134;845;29899;2569;7043;4040;30819;93649;3624;4625;93974;9455;6262;8476;1374;1278;2099;54585;4882;7299;9464;5793;2317;9727;2941;2191;467;5743;7915;9421;25937;26353;84451;126393;88;7988;93986;5019;2690;253980;50808;23090;9099;3164;6663;5834;9096;64225;5311;34;7201	59
molecular function	tumor necrosis factor receptor binding	GO:0005164	10	2.94	0.0148	TNF;CD40LG;LTB;STAT1;TNFSF13B;TNFSF10;ERAP1;TNFSF15;CASP8;TNFSF8	7124;959;4050;6772;10673;8743;51752;9966;841;944	ENSG00000232810;ENSG00000102245;ENSG00000227507;ENSG00000115415;ENSG00000102524;ENSG00000121858;ENSG00000164307;ENSG00000181634;ENSG00000064012;ENSG00000106952	ENSG00000232810;ENSG00000102245;ENSG00000227507;ENSG00000115415;ENSG00000102524;ENSG00000121858;ENSG00000164307;ENSG00000181634;ENSG00000064012;ENSG00000106952	10	ENSG00000232810;ENSG00000102245;ENSG00000227507;ENSG00000115415;ENSG00000102524;ENSG00000121858;ENSG00000164307;ENSG00000064012;ENSG00000106952	9	7124;959;4050;6772;10673;8743;51752;841;944	9	ENSG00000232810;ENSG00000102245;ENSG00000227507;ENSG00000115415;ENSG00000102524;ENSG00000121858;ENSG00000164307;ENSG00000181634;ENSG00000064012;ENSG00000106952	10	ENSG00000181634	1	9966	1
molecular function	exopeptidase activity	GO:0008238	25	1.93	0.0148	FAP;ENPEP;AGBL2;AEBP1;CPO;ASRGL1;LAP3;ACE;DPP3;PREP;CNDP1;GGH;TPP1;NAALAD2;CPVL;METAP1;XPNPEP1;DPP4;ERAP1;DPEP1;CNDP2;LTA4H;ACE2;CPE;CTSH	2191;2028;79841;165;130749;80150;51056;1636;10072;5550;84735;8836;1200;10003;54504;23173;7511;1803;51752;1800;55748;4048;59272;1363;1512	ENSG00000078098;ENSG00000138792;ENSG00000165923;ENSG00000106624;ENSG00000144410;ENSG00000162174;ENSG00000002549;ENSG00000159640;ENSG00000254986;ENSG00000085377;ENSG00000150656;ENSG00000137563;ENSG00000166340;ENSG00000077616;ENSG00000106066;ENSG00000164024;ENSG00000108039;ENSG00000197635;ENSG00000164307;ENSG00000015413;ENSG00000133313;ENSG00000111144;ENSG00000130234;ENSG00000109472;ENSG00000103811	ENSG00000078098;ENSG00000138792;ENSG00000165923;ENSG00000106624;ENSG00000144410;ENSG00000162174;ENSG00000002549;ENSG00000159640;ENSG00000254986;ENSG00000085377;ENSG00000150656;ENSG00000137563;ENSG00000166340;ENSG00000077616;ENSG00000106066;ENSG00000164024;ENSG00000108039;ENSG00000197635;ENSG00000164307;ENSG00000015413;ENSG00000133313;ENSG00000111144;ENSG00000130234;ENSG00000109472;ENSG00000103811	25	ENSG00000138792;ENSG00000165923;ENSG00000144410;ENSG00000002549;ENSG00000159640;ENSG00000254986;ENSG00000085377;ENSG00000150656;ENSG00000137563;ENSG00000166340;ENSG00000106066;ENSG00000164024;ENSG00000108039;ENSG00000164307;ENSG00000015413;ENSG00000133313;ENSG00000111144;ENSG00000103811	18	2028;79841;130749;51056;1636;10072;5550;84735;8836;1200;54504;23173;7511;51752;1800;55748;4048;1512	18	ENSG00000078098;ENSG00000138792;ENSG00000165923;ENSG00000106624;ENSG00000144410;ENSG00000162174;ENSG00000002549;ENSG00000159640;ENSG00000254986;ENSG00000085377;ENSG00000150656;ENSG00000137563;ENSG00000166340;ENSG00000077616;ENSG00000106066;ENSG00000164024;ENSG00000108039;ENSG00000197635;ENSG00000164307;ENSG00000015413;ENSG00000133313;ENSG00000111144;ENSG00000130234;ENSG00000109472;ENSG00000103811	25	ENSG00000078098;ENSG00000106624;ENSG00000162174;ENSG00000077616;ENSG00000197635;ENSG00000130234;ENSG00000109472	7	2191;165;80150;10003;1803;59272;1363	7
molecular function	endopeptidase activity	GO:0004175	65	1.48	0.0148	ADAM19;ADAMDEC1;CTSF;ST14;HTRA1;ADAMTS15;PREP;PRSS46;ADAMTS6;ADAMTS1;TMPRSS7;GZMB;PRSS38;TPP1;PSMB8;MMP7;PSMA6;C1RL;MMP13;CASP8;C2;CAPN9;OMA1;FAP;GZMA;CASP9;PGA4;MMP1;PSMB9;CASP4;TYSND1;RHBDL2;ADAM28;MMP8;TRABD2A;DPP4;KLK4;USP11;HM13;ACE;GZMK;ADAMTSL4;RHBDD1;SPPL2A;CTSS;CTSC;PYCARD;CAPN13;CASP1;CTSH;PSMB6;CPS1;MMP24;USP2;PRSS23;CFI;USP6;SPG7;ADAMTS17;PSMB10;CAPN11;C1S;ACE2;MMP16;MME	8728;27299;8722;6768;5654;170689;5550;100287362;11174;9510;344805;3002;339501;1200;5696;4316;5687;51279;4322;841;717;10753;115209;2191;3001;842;643847;4312;5698;837;219743;54933;10863;4317;129293;1803;9622;8237;81502;1636;3003;54507;84236;84888;1520;1075;29108;92291;834;1512;5694;1373;10893;9099;11098;3426;9098;6687;170691;5699;11131;716;59272;4325;4311	ENSG00000135074;ENSG00000134028;ENSG00000174080;ENSG00000149418;ENSG00000166033;ENSG00000166106;ENSG00000085377;ENSG00000261603;ENSG00000049192;ENSG00000154734;ENSG00000176040;ENSG00000100453;ENSG00000185888;ENSG00000166340;ENSG00000204264;ENSG00000137673;ENSG00000100902;ENSG00000139178;ENSG00000137745;ENSG00000064012;ENSG00000166278;ENSG00000135773;ENSG00000162600;ENSG00000078098;ENSG00000145649…	ENSG00000135074;ENSG00000134028;ENSG00000174080;ENSG00000149418;ENSG00000166033;ENSG00000166106;ENSG00000085377;ENSG00000261603;ENSG00000049192;ENSG00000154734;ENSG00000176040;ENSG00000100453;ENSG00000185888;ENSG00000166340;ENSG00000204264;ENSG00000137673;ENSG00000100902;ENSG00000139178;ENSG00000137745;ENSG00000064012;ENSG00000166278;ENSG00000135773;ENSG00000162600;ENSG00000078098;ENSG00000145649…	65	ENSG00000134028;ENSG00000149418;ENSG00000085377;ENSG00000261603;ENSG00000100453;ENSG00000166340;ENSG00000204264;ENSG00000137673;ENSG00000100902;ENSG00000139178;ENSG00000137745;ENSG00000064012;ENSG00000166278;ENSG00000135773;ENSG00000145649;ENSG00000132906;ENSG00000196611;ENSG00000240065;ENSG00000196954;ENSG00000156521;ENSG00000158315;ENSG00000042980;ENSG00000186854;ENSG00000167749;ENSG00000101294…	38	27299;6768;5550;100287362;3002;1200;5696;4316;5687;51279;4322;841;717;10753;3001;842;4312;5698;837;219743;54933;10863;129293;9622;81502;1636;3003;84888;1520;1075;29108;92291;834;1512;3426;5699;716;4311	38	ENSG00000135074;ENSG00000134028;ENSG00000174080;ENSG00000149418;ENSG00000166033;ENSG00000166106;ENSG00000085377;ENSG00000261603;ENSG00000049192;ENSG00000154734;ENSG00000176040;ENSG00000100453;ENSG00000185888;ENSG00000166340;ENSG00000204264;ENSG00000137673;ENSG00000100902;ENSG00000139178;ENSG00000137745;ENSG00000064012;ENSG00000166278;ENSG00000135773;ENSG00000162600;ENSG00000078098;ENSG00000145649…	65	ENSG00000135074;ENSG00000174080;ENSG00000166033;ENSG00000166106;ENSG00000049192;ENSG00000154734;ENSG00000176040;ENSG00000185888;ENSG00000162600;ENSG00000078098;ENSG00000229183;ENSG00000118113;ENSG00000197635;ENSG00000102226;ENSG00000143382;ENSG00000144468;ENSG00000142507;ENSG00000021826;ENSG00000125966;ENSG00000036672;ENSG00000150687;ENSG00000129204;ENSG00000197912;ENSG00000140470;ENSG00000137225…	27	8728;8722;5654;170689;11174;9510;344805;339501;115209;2191;643847;4317;1803;8237;54507;84236;5694;1373;10893;9099;11098;9098;6687;170691;11131;59272;4325	27
molecular function	substrate-specific channel activity	GO:0022838	61	1.5	0.0148	KCNIP4;KCNMB1;SCN5A;CHRNA9;RYR1;GLRB;MS4A2;TRPM6;AQP1;CLCC1;SLC9C2;STX1B;MIP;CLIC2;PIEZO2;PLLP;MCOLN2;ABCC8;AQP2;LRRC55;TRPV2;HVCN1;GABRR1;KCNAB1;CHRNB3;GABRP;CACNB2;AQP4;KCNS3;FXYD5;TRPC1;CLIC1;KCNK2;TMEM37;KCNIP2;SCN2A;SCN7A;NOX1;AQP8;P2RX4;GPM6A;KCNK10;KCNJ8;FGF2;KCNH5;KCNMA1;PANX3;KCNA5;RYR2;KCNH2;KCNE3;CACNB1;PKD2L2;TPTE2;KCNK1;PKD2;ITGAV;TRPC3;HCN1;CACNA2D1;SLC4A11	80333;3779;6331;55584;6261;2743;2206;140803;358;23155;284525;112755;4284;1193;63895;51090;255231;6833;359;219527;51393;84329;2569;7881;1142;2568;783;361;3790;53827;7220;1192;3776;140738;30819;6326;6332;27035;343;5025;2823;54207;3764;2247;27133;3778;116337;3741;6262;3757;10008;782;27039;93492;3775;5311;3685;7222;348980;781;83959	ENSG00000185774;ENSG00000145936;ENSG00000183873;ENSG00000174343;ENSG00000196218;ENSG00000109738;ENSG00000149534;ENSG00000119121;ENSG00000240583;ENSG00000121940;ENSG00000162753;ENSG00000099365;ENSG00000135517;ENSG00000155962;ENSG00000154864;ENSG00000102934;ENSG00000153898;ENSG00000006071;ENSG00000167580;ENSG00000183908;ENSG00000187688;ENSG00000122986;ENSG00000146276;ENSG00000169282;ENSG00000147432…	ENSG00000185774;ENSG00000145936;ENSG00000183873;ENSG00000174343;ENSG00000196218;ENSG00000109738;ENSG00000149534;ENSG00000119121;ENSG00000240583;ENSG00000121940;ENSG00000162753;ENSG00000099365;ENSG00000135517;ENSG00000155962;ENSG00000154864;ENSG00000102934;ENSG00000153898;ENSG00000006071;ENSG00000167580;ENSG00000183908;ENSG00000187688;ENSG00000122986;ENSG00000146276;ENSG00000169282;ENSG00000147432…	61	ENSG00000185774;ENSG00000174343;ENSG00000149534;ENSG00000119121;ENSG00000155962;ENSG00000154864;ENSG00000102934;ENSG00000153898;ENSG00000167580;ENSG00000183908;ENSG00000187688;ENSG00000122986;ENSG00000094755;ENSG00000171885;ENSG00000170745;ENSG00000089327;ENSG00000213719;ENSG00000082482;ENSG00000171227;ENSG00000007952;ENSG00000103375;ENSG00000135124;ENSG00000135750;ENSG00000138741;ENSG00000088836	25	80333;55584;2206;140803;1193;63895;51090;255231;359;219527;51393;84329;2568;361;3790;53827;1192;3776;140738;27035;343;5025;3775;7222;83959	25	ENSG00000185774;ENSG00000145936;ENSG00000183873;ENSG00000174343;ENSG00000196218;ENSG00000109738;ENSG00000149534;ENSG00000119121;ENSG00000240583;ENSG00000121940;ENSG00000162753;ENSG00000099365;ENSG00000135517;ENSG00000155962;ENSG00000154864;ENSG00000102934;ENSG00000153898;ENSG00000006071;ENSG00000167580;ENSG00000183908;ENSG00000187688;ENSG00000122986;ENSG00000146276;ENSG00000169282;ENSG00000147432…	61	ENSG00000145936;ENSG00000183873;ENSG00000196218;ENSG00000109738;ENSG00000240583;ENSG00000121940;ENSG00000162753;ENSG00000099365;ENSG00000135517;ENSG00000006071;ENSG00000146276;ENSG00000169282;ENSG00000147432;ENSG00000165995;ENSG00000144935;ENSG00000120049;ENSG00000136531;ENSG00000136546;ENSG00000150625;ENSG00000100433;ENSG00000121361;ENSG00000138685;ENSG00000140015;ENSG00000156113;ENSG00000154143…	36	3779;6331;6261;2743;358;23155;284525;112755;4284;6833;2569;7881;1142;783;7220;30819;6326;6332;2823;54207;3764;2247;27133;3778;116337;3741;6262;3757;10008;782;27039;93492;5311;3685;348980;781	36
molecular function	receptor activity	GO:0004872	167	1.26	0.0187	RORB;LGR5;LTBP1;PTAFR;P2RY4;PLXNC1;CD3E;MS4A2;SLAMF7;GPR149;PDGFRL;DNER;CD5;OR10K1;TGFBR3;CD247;GPR87;CLDN4;TACSTD2;TINAGL1;SCARA3;TLR4;TRAM1;PGR;THRB;ITGB7;GPRC5A;SELE;KCNH2;CD36;P2RY10;ITGB2;ENPP1;LEF1;OR6K3;IL13RA2;VIPR1;OR4N5;GPR174;OLR1;CXCR7;CD3G;ADIPOR2;OR7E24;CXCR6;CD27;ITGB5;IL18R1;CD244;ABCC9;GABRR1;DAB2;SORL1;LRP6;TSPAN12;CD3D;GPR82;EPHB3;FGFR4;CD79B;CALCRL;ADRB2;CD72;ROS1;GPR64;BAI3;O…	6096;8549;4052;5724;5030;10154;916;2206;57823;344758;5157;92737;921;391109;7049;919;53836;1364;4070;64129;51435;7099;23471;5241;7068;3695;9052;6401;3757;948;27334;3689;5167;51176;391114;3598;7433;390437;84636;4973;57007;917;79602;26648;10663;939;3693;8809;51744;10060;2569;1601;6653;4040;23554;915;27197;2049;2264;974;10203;154;971;6098;10149;577;79627;1378;10161;961;57091;4929;53829;2982;2099;2045…	ENSG00000198963;ENSG00000139292;ENSG00000049323;ENSG00000169403;ENSG00000186912;ENSG00000136040;ENSG00000198851;ENSG00000149534;ENSG00000026751;ENSG00000174948;ENSG00000104213;ENSG00000187957;ENSG00000110448;ENSG00000173285;ENSG00000069702;ENSG00000198821;ENSG00000138271;ENSG00000189143;ENSG00000184292;ENSG00000142910;ENSG00000168077;ENSG00000136869;ENSG00000067167;ENSG00000082175;ENSG00000151090…	ENSG00000198963;ENSG00000139292;ENSG00000049323;ENSG00000169403;ENSG00000186912;ENSG00000136040;ENSG00000198851;ENSG00000149534;ENSG00000026751;ENSG00000174948;ENSG00000104213;ENSG00000187957;ENSG00000110448;ENSG00000173285;ENSG00000069702;ENSG00000198821;ENSG00000138271;ENSG00000189143;ENSG00000184292;ENSG00000142910;ENSG00000168077;ENSG00000136869;ENSG00000067167;ENSG00000082175;ENSG00000151090…	167	ENSG00000139292;ENSG00000169403;ENSG00000186912;ENSG00000136040;ENSG00000198851;ENSG00000149534;ENSG00000026751;ENSG00000174948;ENSG00000110448;ENSG00000198821;ENSG00000138271;ENSG00000189143;ENSG00000184292;ENSG00000136869;ENSG00000067167;ENSG00000082175;ENSG00000139626;ENSG00000013588;ENSG00000135218;ENSG00000078589;ENSG00000160255;ENSG00000138795;ENSG00000123496;ENSG00000114812;ENSG00000147138…	108	8549;5724;5030;10154;916;2206;57823;344758;921;919;53836;1364;4070;7099;23471;5241;3695;9052;948;27334;3689;51176;3598;7433;84636;4973;917;79602;10663;939;8809;51744;6653;23554;915;27197;2264;974;10203;154;971;6098;577;79627;1378;10161;961;57091;53829;26253;4481;81793;2322;2022;7098;3902;10894;4233;3687;221391;3694;149233;6423;8993;2357;5734;114908;929;4864;2348;5729;2123;8416;19;1524;10261;9723;…	108	ENSG00000198963;ENSG00000139292;ENSG00000049323;ENSG00000169403;ENSG00000186912;ENSG00000136040;ENSG00000198851;ENSG00000149534;ENSG00000026751;ENSG00000174948;ENSG00000104213;ENSG00000187957;ENSG00000110448;ENSG00000173285;ENSG00000069702;ENSG00000198821;ENSG00000138271;ENSG00000189143;ENSG00000184292;ENSG00000142910;ENSG00000168077;ENSG00000136869;ENSG00000067167;ENSG00000082175;ENSG00000151090…	167	ENSG00000198963;ENSG00000049323;ENSG00000104213;ENSG00000187957;ENSG00000173285;ENSG00000069702;ENSG00000142910;ENSG00000168077;ENSG00000151090;ENSG00000007908;ENSG00000055118;ENSG00000197594;ENSG00000203757;ENSG00000184394;ENSG00000144476;ENSG00000237521;ENSG00000082781;ENSG00000069431;ENSG00000146276;ENSG00000153071;ENSG00000070018;ENSG00000182580;ENSG00000173698;ENSG00000153234;ENSG00000164116…	59	6096;4052;5157;92737;391109;7049;64129;51435;7068;6401;3757;5167;391114;390437;57007;26648;3693;10060;2569;1601;4040;2049;10149;4929;2982;2099;2045;5365;6785;5745;4882;4921;5793;6833;143503;92;122042;139411;27133;54875;148738;3696;2690;4852;50837;3590;51232;3164;9568;185;8425;2487;6424;8013;6259;59272;7201;26692;1129	59
molecular function	carboxylic acid binding	GO:0031406	41	1.61	0.0224	OTC;ALOX5AP;SELP;LEPREL1;SESTD1;GLRB;MFGE8;ST8SIA4;S100A8;CPNE6;SLC1A1;SCIN;GSS;IDO1;SLC19A3;SLC46A1;SHMT2;GOT1;EGLN3;S100A9;TMLHE;SHMT1;CPS1;LEPREL2;GCLC;SELE;FASN;SCP2;MGST1;FOLR1;STX3;DDAH1;MTHFS;PLOD2;P4HA2;P4HA3;PAM;DPEP1;ANXA9;NOS2;HDC	5009;241;6403;55214;91404;2743;4240;7903;6279;9362;6505;85477;2937;3620;80704;113235;6472;2805;112399;6280;55217;6470;1373;10536;2729;6401;2194;6342;4257;2348;6809;23576;10588;5352;8974;283208;5066;1800;8416;4843;3067	ENSG00000036473;ENSG00000132965;ENSG00000174175;ENSG00000090530;ENSG00000187231;ENSG00000109738;ENSG00000140545;ENSG00000113532;ENSG00000143546;ENSG00000100884;ENSG00000106688;ENSG00000006747;ENSG00000100983;ENSG00000131203;ENSG00000135917;ENSG00000076351;ENSG00000182199;ENSG00000120053;ENSG00000129521;ENSG00000163220;ENSG00000185973;ENSG00000176974;ENSG00000021826;ENSG00000110811;ENSG00000001084…	ENSG00000036473;ENSG00000132965;ENSG00000174175;ENSG00000090530;ENSG00000187231;ENSG00000109738;ENSG00000140545;ENSG00000113532;ENSG00000143546;ENSG00000100884;ENSG00000106688;ENSG00000006747;ENSG00000100983;ENSG00000131203;ENSG00000135917;ENSG00000076351;ENSG00000182199;ENSG00000120053;ENSG00000129521;ENSG00000163220;ENSG00000185973;ENSG00000176974;ENSG00000021826;ENSG00000110811;ENSG00000001084…	41	ENSG00000132965;ENSG00000174175;ENSG00000113532;ENSG00000143546;ENSG00000106688;ENSG00000006747;ENSG00000100983;ENSG00000131203;ENSG00000135917;ENSG00000076351;ENSG00000182199;ENSG00000163220;ENSG00000176974;ENSG00000001084;ENSG00000169710;ENSG00000116171;ENSG00000008394;ENSG00000110195;ENSG00000166900;ENSG00000136371;ENSG00000149380;ENSG00000015413;ENSG00000143412;ENSG00000007171;ENSG00000140287	25	241;6403;7903;6279;6505;85477;2937;3620;80704;113235;6472;6280;6470;2729;2194;6342;4257;2348;6809;10588;283208;1800;8416;4843;3067	25	ENSG00000036473;ENSG00000132965;ENSG00000174175;ENSG00000090530;ENSG00000187231;ENSG00000109738;ENSG00000140545;ENSG00000113532;ENSG00000143546;ENSG00000100884;ENSG00000106688;ENSG00000006747;ENSG00000100983;ENSG00000131203;ENSG00000135917;ENSG00000076351;ENSG00000182199;ENSG00000120053;ENSG00000129521;ENSG00000163220;ENSG00000185973;ENSG00000176974;ENSG00000021826;ENSG00000110811;ENSG00000001084…	41	ENSG00000036473;ENSG00000090530;ENSG00000187231;ENSG00000109738;ENSG00000140545;ENSG00000100884;ENSG00000120053;ENSG00000129521;ENSG00000185973;ENSG00000021826;ENSG00000110811;ENSG00000007908;ENSG00000153904;ENSG00000152952;ENSG00000072682;ENSG00000145730	16	5009;55214;91404;2743;4240;9362;2805;112399;55217;1373;10536;6401;23576;5352;8974;5066	16
molecular function	peptidase activity, acting on L-amino acid peptides	GO:0070011	89	1.36	0.0246	ADAM19;ENPEP;CYLD;ADAMDEC1;CPO;CTSF;ST14;HTRA1;ADAMTS15;PREP;PRSS46;ADAMTS6;ADAMTS1;TMPRSS7;GZMB;PRSS38;ZFYVE9;TPP1;PSMB8;MMP7;PSMA6;CPVL;C1RL;TINAGL1;MMP13;CASP8;C2;CPE;CAPN9;OMA1;FAP;GZMA;LAP3;USP18;CASP9;PGA4;MMP1;PSMB9;CASP4;TYSND1;RHBDL2;ADAM28;METAP1;MMP8;TRABD2A;KLK4;DPP4;XPNPEP1;USP11;LTA4H;HM13;AGBL2;AEBP1;ACE;GZMK;ADAMTSL4;RHBDD1;SPPL2A;CTSS;CTSC;PYCARD;CAPN13;CASP1;CTSH;PSMB6;CPS1;MMP2…	8728;2028;1540;27299;130749;8722;6768;5654;170689;5550;100287362;11174;9510;344805;3002;339501;9372;1200;5696;4316;5687;54504;51279;64129;4322;841;717;1363;10753;115209;2191;3001;51056;11274;842;643847;4312;5698;837;219743;54933;10863;23173;4317;129293;9622;1803;7511;8237;4048;81502;79841;165;1636;3003;54507;84236;84888;1520;1075;29108;92291;834;1512;5694;1373;10893;9099;57188;11098;7128;80150;34…	ENSG00000135074;ENSG00000138792;ENSG00000083799;ENSG00000134028;ENSG00000144410;ENSG00000174080;ENSG00000149418;ENSG00000166033;ENSG00000166106;ENSG00000085377;ENSG00000261603;ENSG00000049192;ENSG00000154734;ENSG00000176040;ENSG00000100453;ENSG00000185888;ENSG00000157077;ENSG00000166340;ENSG00000204264;ENSG00000137673;ENSG00000100902;ENSG00000106066;ENSG00000139178;ENSG00000142910;ENSG00000137745…	ENSG00000135074;ENSG00000138792;ENSG00000083799;ENSG00000134028;ENSG00000144410;ENSG00000174080;ENSG00000149418;ENSG00000166033;ENSG00000166106;ENSG00000085377;ENSG00000261603;ENSG00000049192;ENSG00000154734;ENSG00000176040;ENSG00000100453;ENSG00000185888;ENSG00000157077;ENSG00000166340;ENSG00000204264;ENSG00000137673;ENSG00000100902;ENSG00000106066;ENSG00000139178;ENSG00000142910;ENSG00000137745…	89	ENSG00000138792;ENSG00000083799;ENSG00000134028;ENSG00000144410;ENSG00000149418;ENSG00000085377;ENSG00000261603;ENSG00000100453;ENSG00000166340;ENSG00000204264;ENSG00000137673;ENSG00000100902;ENSG00000106066;ENSG00000139178;ENSG00000137745;ENSG00000064012;ENSG00000166278;ENSG00000135773;ENSG00000145649;ENSG00000002549;ENSG00000184979;ENSG00000132906;ENSG00000196611;ENSG00000240065;ENSG00000196954…	55	2028;1540;27299;130749;6768;5550;100287362;3002;1200;5696;4316;5687;54504;51279;4322;841;717;10753;3001;51056;11274;842;4312;5698;837;219743;54933;10863;23173;129293;9622;7511;4048;81502;79841;1636;3003;84888;1520;1075;29108;92291;834;1512;7128;3426;10072;84735;8836;5699;51752;1800;716;55748;4311	55	ENSG00000135074;ENSG00000138792;ENSG00000083799;ENSG00000134028;ENSG00000144410;ENSG00000174080;ENSG00000149418;ENSG00000166033;ENSG00000166106;ENSG00000085377;ENSG00000261603;ENSG00000049192;ENSG00000154734;ENSG00000176040;ENSG00000100453;ENSG00000185888;ENSG00000157077;ENSG00000166340;ENSG00000204264;ENSG00000137673;ENSG00000100902;ENSG00000106066;ENSG00000139178;ENSG00000142910;ENSG00000137745…	89	ENSG00000135074;ENSG00000174080;ENSG00000166033;ENSG00000166106;ENSG00000049192;ENSG00000154734;ENSG00000176040;ENSG00000185888;ENSG00000157077;ENSG00000142910;ENSG00000109472;ENSG00000162600;ENSG00000078098;ENSG00000229183;ENSG00000118113;ENSG00000197635;ENSG00000102226;ENSG00000106624;ENSG00000143382;ENSG00000144468;ENSG00000142507;ENSG00000021826;ENSG00000125966;ENSG00000036672;ENSG00000156218…	34	8728;8722;5654;170689;11174;9510;344805;339501;9372;64129;1363;115209;2191;643847;4317;1803;8237;165;54507;84236;5694;1373;10893;9099;57188;11098;80150;9098;170691;6687;10003;11131;59272;4325	34
molecular function	phosphotransferase activity, nitrogenous group as acceptor	GO:0016775	7	3.43	0.0246	CASS4;CKMT2;KCNH2;CKMT1A;KCNH5;CNTLN;CKM	57091;1160;3757;548596;27133;54875;1158	ENSG00000087589;ENSG00000131730;ENSG00000055118;ENSG00000223572;ENSG00000140015;ENSG00000044459;ENSG00000104879	ENSG00000087589;ENSG00000131730;ENSG00000055118;ENSG00000223572;ENSG00000140015;ENSG00000044459;ENSG00000104879	7	ENSG00000087589;ENSG00000223572	2	57091;548596	2	ENSG00000087589;ENSG00000131730;ENSG00000055118;ENSG00000223572;ENSG00000140015;ENSG00000044459;ENSG00000104879	7	ENSG00000131730;ENSG00000055118;ENSG00000140015;ENSG00000044459;ENSG00000104879	5	1160;3757;27133;54875;1158	5
molecular function	carbohydrate binding	GO:0030246	46	1.55	0.0246	CLEC4E;GALNTL1;OLR1;LGALS3;SELP;LEPREL1;ST8SIA4;SELL;M6PR;ENG;AIM1L;CLEC4A;ZG16;CHI3L2;AIM1;CLEC4D;TINAGL1;CLEC5A;EGLN3;LMAN1;AGL;TMLHE;SFTPA1;CLEC7A;REG3G;LEPREL2;SELE;IL2;CLEC9A;REG3A;GANC;CD72;ITLN1;LGALS4;REG4;GALNT3;ENPP1;DGCR2;PLOD2;FBP1;VCAN;P4HA2;P4HA3;PAM;CD207;CNTN1	26253;57452;4973;3958;6403;55214;7903;6402;4074;2022;55057;50856;653808;1117;202;338339;64129;23601;112399;3998;178;55217;653509;64581;130120;10536;6401;3558;283420;5068;2595;971;55600;3960;83998;2591;5167;9993;5352;2203;1462;8974;283208;5066;50489;1272	ENSG00000166523;ENSG00000100626;ENSG00000173391;ENSG00000131981;ENSG00000174175;ENSG00000090530;ENSG00000113532;ENSG00000188404;ENSG00000003056;ENSG00000106991;ENSG00000176092;ENSG00000111729;ENSG00000174992;ENSG00000064886;ENSG00000112297;ENSG00000166527;ENSG00000142910;ENSG00000258227;ENSG00000129521;ENSG00000074695;ENSG00000162688;ENSG00000185973;ENSG00000122852;ENSG00000172243;ENSG00000143954…	ENSG00000166523;ENSG00000100626;ENSG00000173391;ENSG00000131981;ENSG00000174175;ENSG00000090530;ENSG00000113532;ENSG00000188404;ENSG00000003056;ENSG00000106991;ENSG00000176092;ENSG00000111729;ENSG00000174992;ENSG00000064886;ENSG00000112297;ENSG00000166527;ENSG00000142910;ENSG00000258227;ENSG00000129521;ENSG00000074695;ENSG00000162688;ENSG00000185973;ENSG00000122852;ENSG00000172243;ENSG00000143954…	46	ENSG00000166523;ENSG00000173391;ENSG00000131981;ENSG00000174175;ENSG00000113532;ENSG00000188404;ENSG00000003056;ENSG00000106991;ENSG00000176092;ENSG00000111729;ENSG00000174992;ENSG00000064886;ENSG00000112297;ENSG00000166527;ENSG00000258227;ENSG00000074695;ENSG00000122852;ENSG00000172243;ENSG00000143954;ENSG00000109471;ENSG00000197992;ENSG00000137101;ENSG00000179914;ENSG00000171747;ENSG00000115339…	28	26253;4973;3958;6403;7903;6402;4074;2022;55057;50856;653808;1117;202;338339;23601;3998;653509;64581;130120;3558;283420;971;55600;3960;2591;2203;283208;50489	28	ENSG00000166523;ENSG00000100626;ENSG00000173391;ENSG00000131981;ENSG00000174175;ENSG00000090530;ENSG00000113532;ENSG00000188404;ENSG00000003056;ENSG00000106991;ENSG00000176092;ENSG00000111729;ENSG00000174992;ENSG00000064886;ENSG00000112297;ENSG00000166527;ENSG00000142910;ENSG00000258227;ENSG00000129521;ENSG00000074695;ENSG00000162688;ENSG00000185973;ENSG00000122852;ENSG00000172243;ENSG00000143954…	46	ENSG00000100626;ENSG00000090530;ENSG00000142910;ENSG00000129521;ENSG00000162688;ENSG00000185973;ENSG00000110811;ENSG00000007908;ENSG00000172016;ENSG00000214013;ENSG00000134193;ENSG00000197594;ENSG00000070413;ENSG00000152952;ENSG00000038427;ENSG00000072682;ENSG00000145730;ENSG00000018236	18	57452;55214;64129;112399;178;55217;10536;6401;5068;2595;83998;5167;9993;5352;1462;8974;5066;1272	18
molecular function	pattern recognition receptor activity	GO:0008329	7	3.43	0.0246	MARCO;PTAFR;CD14;CLEC7A;TLR4;CD36;PGLYRP1	8685;5724;929;64581;7099;948;8993	ENSG00000019169;ENSG00000169403;ENSG00000170458;ENSG00000172243;ENSG00000136869;ENSG00000135218;ENSG00000008438	ENSG00000019169;ENSG00000169403;ENSG00000170458;ENSG00000172243;ENSG00000136869;ENSG00000135218;ENSG00000008438	7	ENSG00000019169;ENSG00000169403;ENSG00000170458;ENSG00000172243;ENSG00000136869;ENSG00000135218;ENSG00000008438	7	8685;5724;929;64581;7099;948;8993	7	ENSG00000019169;ENSG00000169403;ENSG00000170458;ENSG00000172243;ENSG00000136869;ENSG00000135218;ENSG00000008438	7		0		0
molecular function	serine-type endopeptidase activity	GO:0004252	24	1.89	0.0246	FAP;GZMA;PRSS23;ST14;HTRA1;CFI;PREP;PRSS46;TMPRSS7;GZMB;GZMK;TYSND1;RHBDD1;PRSS38;RHBDL2;TPP1;CTSC;MMP8;C1RL;DPP4;KLK4;C1S;C2;CTSH	2191;3001;11098;6768;5654;3426;5550;100287362;344805;3002;3003;219743;84236;339501;54933;1200;1075;4317;51279;1803;9622;716;717;1512	ENSG00000078098;ENSG00000145649;ENSG00000150687;ENSG00000149418;ENSG00000166033;ENSG00000205403;ENSG00000085377;ENSG00000261603;ENSG00000176040;ENSG00000100453;ENSG00000113088;ENSG00000156521;ENSG00000144468;ENSG00000185888;ENSG00000158315;ENSG00000166340;ENSG00000109861;ENSG00000118113;ENSG00000139178;ENSG00000197635;ENSG00000167749;ENSG00000182326;ENSG00000166278;ENSG00000103811	ENSG00000078098;ENSG00000145649;ENSG00000150687;ENSG00000149418;ENSG00000166033;ENSG00000205403;ENSG00000085377;ENSG00000261603;ENSG00000176040;ENSG00000100453;ENSG00000113088;ENSG00000156521;ENSG00000144468;ENSG00000185888;ENSG00000158315;ENSG00000166340;ENSG00000109861;ENSG00000118113;ENSG00000139178;ENSG00000197635;ENSG00000167749;ENSG00000182326;ENSG00000166278;ENSG00000103811	24	ENSG00000145649;ENSG00000149418;ENSG00000205403;ENSG00000085377;ENSG00000261603;ENSG00000100453;ENSG00000113088;ENSG00000156521;ENSG00000158315;ENSG00000166340;ENSG00000109861;ENSG00000139178;ENSG00000167749;ENSG00000182326;ENSG00000166278;ENSG00000103811	16	3001;6768;3426;5550;100287362;3002;3003;219743;54933;1200;1075;51279;9622;716;717;1512	16	ENSG00000078098;ENSG00000145649;ENSG00000150687;ENSG00000149418;ENSG00000166033;ENSG00000205403;ENSG00000085377;ENSG00000261603;ENSG00000176040;ENSG00000100453;ENSG00000113088;ENSG00000156521;ENSG00000144468;ENSG00000185888;ENSG00000158315;ENSG00000166340;ENSG00000109861;ENSG00000118113;ENSG00000139178;ENSG00000197635;ENSG00000167749;ENSG00000182326;ENSG00000166278;ENSG00000103811	24	ENSG00000078098;ENSG00000150687;ENSG00000166033;ENSG00000176040;ENSG00000144468;ENSG00000185888;ENSG00000118113;ENSG00000197635	8	2191;11098;5654;344805;84236;339501;4317;1803	8
molecular function	peptidase activity	GO:0008233	92	1.35	0.0246	ADAM19;ENPEP;CYLD;ADAMDEC1;CPO;CTSF;ST14;HTRA1;ADAMTS15;PREP;PRSS46;ADAMTS6;ADAMTS1;TMPRSS7;GZMB;PRSS38;ZFYVE9;TPP1;PSMB8;MMP7;PSMA6;CPVL;QPCT;C1RL;TINAGL1;MMP13;CASP8;C2;CPE;CAPN9;OMA1;FAP;GZMA;LAP3;USP18;CASP9;PGA4;MMP1;DESI1;PSMB9;CASP4;TYSND1;RHBDL2;ADAM28;METAP1;MMP8;TRABD2A;KLK4;DPP4;XPNPEP1;USP11;LTA4H;HM13;AGBL2;AEBP1;ACE;APH1B;GZMK;ADAMTSL4;RHBDD1;SPPL2A;CTSS;CTSC;PYCARD;CAPN13;CASP1;CTS…	8728;2028;1540;27299;130749;8722;6768;5654;170689;5550;100287362;11174;9510;344805;3002;339501;9372;1200;5696;4316;5687;54504;25797;51279;64129;4322;841;717;1363;10753;115209;2191;3001;51056;11274;842;643847;4312;27351;5698;837;219743;54933;10863;23173;4317;129293;9622;1803;7511;8237;4048;81502;79841;165;1636;83464;3003;54507;84236;84888;1520;1075;29108;92291;834;1512;5694;1373;10893;9099;57188;1…	ENSG00000135074;ENSG00000138792;ENSG00000083799;ENSG00000134028;ENSG00000144410;ENSG00000174080;ENSG00000149418;ENSG00000166033;ENSG00000166106;ENSG00000085377;ENSG00000261603;ENSG00000049192;ENSG00000154734;ENSG00000176040;ENSG00000100453;ENSG00000185888;ENSG00000157077;ENSG00000166340;ENSG00000204264;ENSG00000137673;ENSG00000100902;ENSG00000106066;ENSG00000115828;ENSG00000139178;ENSG00000142910…	ENSG00000135074;ENSG00000138792;ENSG00000083799;ENSG00000134028;ENSG00000144410;ENSG00000174080;ENSG00000149418;ENSG00000166033;ENSG00000166106;ENSG00000085377;ENSG00000261603;ENSG00000049192;ENSG00000154734;ENSG00000176040;ENSG00000100453;ENSG00000185888;ENSG00000157077;ENSG00000166340;ENSG00000204264;ENSG00000137673;ENSG00000100902;ENSG00000106066;ENSG00000115828;ENSG00000139178;ENSG00000142910…	92	ENSG00000138792;ENSG00000083799;ENSG00000134028;ENSG00000144410;ENSG00000149418;ENSG00000085377;ENSG00000261603;ENSG00000100453;ENSG00000166340;ENSG00000204264;ENSG00000137673;ENSG00000100902;ENSG00000106066;ENSG00000139178;ENSG00000137745;ENSG00000064012;ENSG00000166278;ENSG00000135773;ENSG00000145649;ENSG00000002549;ENSG00000184979;ENSG00000132906;ENSG00000196611;ENSG00000100418;ENSG00000240065…	57	2028;1540;27299;130749;6768;5550;100287362;3002;1200;5696;4316;5687;54504;51279;4322;841;717;10753;3001;51056;11274;842;4312;27351;5698;837;219743;54933;10863;23173;129293;9622;7511;4048;81502;79841;1636;83464;3003;84888;1520;1075;29108;92291;834;1512;7128;3426;10072;84735;8836;5699;51752;1800;716;55748;4311	57	ENSG00000135074;ENSG00000138792;ENSG00000083799;ENSG00000134028;ENSG00000144410;ENSG00000174080;ENSG00000149418;ENSG00000166033;ENSG00000166106;ENSG00000085377;ENSG00000261603;ENSG00000049192;ENSG00000154734;ENSG00000176040;ENSG00000100453;ENSG00000185888;ENSG00000157077;ENSG00000166340;ENSG00000204264;ENSG00000137673;ENSG00000100902;ENSG00000106066;ENSG00000115828;ENSG00000139178;ENSG00000142910…	92	ENSG00000135074;ENSG00000174080;ENSG00000166033;ENSG00000166106;ENSG00000049192;ENSG00000154734;ENSG00000176040;ENSG00000185888;ENSG00000157077;ENSG00000115828;ENSG00000142910;ENSG00000109472;ENSG00000162600;ENSG00000078098;ENSG00000229183;ENSG00000118113;ENSG00000197635;ENSG00000102226;ENSG00000106624;ENSG00000143382;ENSG00000144468;ENSG00000142507;ENSG00000021826;ENSG00000125966;ENSG00000036672…	35	8728;8722;5654;170689;11174;9510;344805;339501;9372;25797;64129;1363;115209;2191;643847;4317;1803;8237;165;54507;84236;5694;1373;10893;9099;57188;11098;80150;9098;170691;6687;10003;11131;59272;4325	35
molecular function	vitamin B6 binding	GO:0070279	17	2.08	0.0281	SDSL;SHMT1;PSAT1;PYGM;MARC2;OAT;SPTLC2;ACCSL;SGPL1;PYGB;AADAT;GOT2;KYNU;SHMT2;GOT1;SEPSECS;HDC	113675;6470;29968;5837;54996;4942;9517;390110;8879;5834;51166;2806;8942;6472;2805;51091;3067	ENSG00000139410;ENSG00000176974;ENSG00000135069;ENSG00000068976;ENSG00000117791;ENSG00000065154;ENSG00000100596;ENSG00000205126;ENSG00000166224;ENSG00000100994;ENSG00000109576;ENSG00000125166;ENSG00000115919;ENSG00000182199;ENSG00000120053;ENSG00000109618;ENSG00000140287	ENSG00000139410;ENSG00000176974;ENSG00000135069;ENSG00000068976;ENSG00000117791;ENSG00000065154;ENSG00000100596;ENSG00000205126;ENSG00000166224;ENSG00000100994;ENSG00000109576;ENSG00000125166;ENSG00000115919;ENSG00000182199;ENSG00000120053;ENSG00000109618;ENSG00000140287	17	ENSG00000139410;ENSG00000176974;ENSG00000135069;ENSG00000100596;ENSG00000166224;ENSG00000115919;ENSG00000182199;ENSG00000109618;ENSG00000140287	9	113675;6470;29968;9517;8879;8942;6472;51091;3067	9	ENSG00000139410;ENSG00000176974;ENSG00000135069;ENSG00000068976;ENSG00000117791;ENSG00000065154;ENSG00000100596;ENSG00000205126;ENSG00000166224;ENSG00000100994;ENSG00000109576;ENSG00000125166;ENSG00000115919;ENSG00000182199;ENSG00000120053;ENSG00000109618;ENSG00000140287	17	ENSG00000068976;ENSG00000117791;ENSG00000065154;ENSG00000205126;ENSG00000100994;ENSG00000109576;ENSG00000125166;ENSG00000120053	8	5837;54996;4942;390110;5834;51166;2806;2805	8
molecular function	ion channel activity	GO:0005216	57	1.46	0.0281	KCNIP4;KCNMB1;SCN5A;CHRNA9;RYR1;GLRB;MS4A2;TRPM6;AQP1;CLCC1;SLC9C2;STX1B;CLIC2;PIEZO2;PLLP;MCOLN2;ABCC8;LRRC55;TRPV2;HVCN1;GABRR1;KCNAB1;CHRNB3;GABRP;CACNB2;KCNS3;FXYD5;TRPC1;CLIC1;KCNK2;TMEM37;KCNIP2;SCN2A;SCN7A;NOX1;P2RX4;GPM6A;KCNK10;KCNJ8;FGF2;KCNH5;KCNMA1;PANX3;KCNA5;RYR2;KCNH2;KCNE3;CACNB1;PKD2L2;TPTE2;KCNK1;PKD2;ITGAV;HCN1;TRPC3;CACNA2D1;SLC4A11	80333;3779;6331;55584;6261;2743;2206;140803;358;23155;284525;112755;1193;63895;51090;255231;6833;219527;51393;84329;2569;7881;1142;2568;783;3790;53827;7220;1192;3776;140738;30819;6326;6332;27035;5025;2823;54207;3764;2247;27133;3778;116337;3741;6262;3757;10008;782;27039;93492;3775;5311;3685;348980;7222;781;83959	ENSG00000185774;ENSG00000145936;ENSG00000183873;ENSG00000174343;ENSG00000196218;ENSG00000109738;ENSG00000149534;ENSG00000119121;ENSG00000240583;ENSG00000121940;ENSG00000162753;ENSG00000099365;ENSG00000155962;ENSG00000154864;ENSG00000102934;ENSG00000153898;ENSG00000006071;ENSG00000183908;ENSG00000187688;ENSG00000122986;ENSG00000146276;ENSG00000169282;ENSG00000147432;ENSG00000094755;ENSG00000165995…	ENSG00000185774;ENSG00000145936;ENSG00000183873;ENSG00000174343;ENSG00000196218;ENSG00000109738;ENSG00000149534;ENSG00000119121;ENSG00000240583;ENSG00000121940;ENSG00000162753;ENSG00000099365;ENSG00000155962;ENSG00000154864;ENSG00000102934;ENSG00000153898;ENSG00000006071;ENSG00000183908;ENSG00000187688;ENSG00000122986;ENSG00000146276;ENSG00000169282;ENSG00000147432;ENSG00000094755;ENSG00000165995…	57	ENSG00000185774;ENSG00000174343;ENSG00000149534;ENSG00000119121;ENSG00000155962;ENSG00000154864;ENSG00000102934;ENSG00000153898;ENSG00000183908;ENSG00000187688;ENSG00000122986;ENSG00000094755;ENSG00000170745;ENSG00000089327;ENSG00000213719;ENSG00000082482;ENSG00000171227;ENSG00000007952;ENSG00000135124;ENSG00000135750;ENSG00000138741;ENSG00000088836	22	80333;55584;2206;140803;1193;63895;51090;255231;219527;51393;84329;2568;3790;53827;1192;3776;140738;27035;5025;3775;7222;83959	22	ENSG00000185774;ENSG00000145936;ENSG00000183873;ENSG00000174343;ENSG00000196218;ENSG00000109738;ENSG00000149534;ENSG00000119121;ENSG00000240583;ENSG00000121940;ENSG00000162753;ENSG00000099365;ENSG00000155962;ENSG00000154864;ENSG00000102934;ENSG00000153898;ENSG00000006071;ENSG00000183908;ENSG00000187688;ENSG00000122986;ENSG00000146276;ENSG00000169282;ENSG00000147432;ENSG00000094755;ENSG00000165995…	57	ENSG00000145936;ENSG00000183873;ENSG00000196218;ENSG00000109738;ENSG00000240583;ENSG00000121940;ENSG00000162753;ENSG00000099365;ENSG00000006071;ENSG00000146276;ENSG00000169282;ENSG00000147432;ENSG00000165995;ENSG00000144935;ENSG00000120049;ENSG00000136531;ENSG00000136546;ENSG00000150625;ENSG00000100433;ENSG00000121361;ENSG00000138685;ENSG00000140015;ENSG00000156113;ENSG00000154143;ENSG00000130037…	35	3779;6331;6261;2743;358;23155;284525;112755;6833;2569;7881;1142;783;7220;30819;6326;6332;2823;54207;3764;2247;27133;3778;116337;3741;6262;3757;10008;782;27039;93492;5311;3685;348980;781	35
molecular function	pyridoxal phosphate binding	GO:0030170	17	2.08	0.0281	SDSL;SHMT1;PSAT1;PYGM;MARC2;OAT;SPTLC2;ACCSL;SGPL1;PYGB;AADAT;GOT2;KYNU;SHMT2;GOT1;SEPSECS;HDC	113675;6470;29968;5837;54996;4942;9517;390110;8879;5834;51166;2806;8942;6472;2805;51091;3067	ENSG00000139410;ENSG00000176974;ENSG00000135069;ENSG00000068976;ENSG00000117791;ENSG00000065154;ENSG00000100596;ENSG00000205126;ENSG00000166224;ENSG00000100994;ENSG00000109576;ENSG00000125166;ENSG00000115919;ENSG00000182199;ENSG00000120053;ENSG00000109618;ENSG00000140287	ENSG00000139410;ENSG00000176974;ENSG00000135069;ENSG00000068976;ENSG00000117791;ENSG00000065154;ENSG00000100596;ENSG00000205126;ENSG00000166224;ENSG00000100994;ENSG00000109576;ENSG00000125166;ENSG00000115919;ENSG00000182199;ENSG00000120053;ENSG00000109618;ENSG00000140287	17	ENSG00000139410;ENSG00000176974;ENSG00000135069;ENSG00000100596;ENSG00000166224;ENSG00000115919;ENSG00000182199;ENSG00000109618;ENSG00000140287	9	113675;6470;29968;9517;8879;8942;6472;51091;3067	9	ENSG00000139410;ENSG00000176974;ENSG00000135069;ENSG00000068976;ENSG00000117791;ENSG00000065154;ENSG00000100596;ENSG00000205126;ENSG00000166224;ENSG00000100994;ENSG00000109576;ENSG00000125166;ENSG00000115919;ENSG00000182199;ENSG00000120053;ENSG00000109618;ENSG00000140287	17	ENSG00000068976;ENSG00000117791;ENSG00000065154;ENSG00000205126;ENSG00000100994;ENSG00000109576;ENSG00000125166;ENSG00000120053	8	5837;54996;4942;390110;5834;51166;2806;2805	8
molecular function	transmembrane transporter activity	GO:0022857	134	1.27	0.0281	KCNMB1;SLC35D2;SLC22A3;RYR1;ATP8A1;SLC25A13;MS4A2;TRPM6;TAP1;AQP1;SLC9C2;COX6A2;COX10;ATP5J;CLIC2;NIPAL4;KCNAB1;ATP13A3;ATP6V0A4;KCNS3;TRPC1;TMEM37;AQP8;ABCC5;GPM6A;ABCC4;C1orf31;OCA2;KCNK10;SLC23A1;GJB2;SLC16A7;KCNA5;SLC17A5;KCNH2;SLC8A1;SLC25A4;TPTE2;KCNK1;ABCC3;SCN5A;LASP1;CHRNA9;SLC7A7;SLC35A4;GLRB;ANKH;SLC12A4;COX6C;SLC1A1;MIP;MCOLN2;ATP13A5;ABCC9;GABRR1;HVCN1;CHRNB3;CACNB2;AQP4;FXYD5;KCNIP2…	3779;11046;6581;6261;10396;10165;2206;140803;6890;358;284525;1339;1352;522;1193;348938;7881;79572;50617;3790;7220;140738;343;10057;2823;10257;388753;4948;54207;9963;2706;9194;3741;26503;3757;6546;291;93492;3775;8714;6331;3927;55584;9056;113829;2743;56172;6560;1345;6505;4284;255231;344905;10060;2569;84329;1142;783;361;53827;30819;6332;5551;6515;9498;206358;116337;6262;5244;479;6508;245972;7222;658…	ENSG00000145936;ENSG00000130958;ENSG00000146477;ENSG00000196218;ENSG00000124406;ENSG00000004864;ENSG00000149534;ENSG00000119121;ENSG00000168394;ENSG00000240583;ENSG00000162753;ENSG00000156885;ENSG00000006695;ENSG00000154723;ENSG00000155962;ENSG00000172548;ENSG00000169282;ENSG00000133657;ENSG00000105929;ENSG00000170745;ENSG00000144935;ENSG00000171227;ENSG00000103375;ENSG00000114770;ENSG00000150625…	ENSG00000145936;ENSG00000130958;ENSG00000146477;ENSG00000196218;ENSG00000124406;ENSG00000004864;ENSG00000149534;ENSG00000119121;ENSG00000168394;ENSG00000240583;ENSG00000162753;ENSG00000156885;ENSG00000006695;ENSG00000154723;ENSG00000155962;ENSG00000172548;ENSG00000169282;ENSG00000133657;ENSG00000105929;ENSG00000170745;ENSG00000144935;ENSG00000171227;ENSG00000103375;ENSG00000114770;ENSG00000150625…	134	ENSG00000130958;ENSG00000124406;ENSG00000004864;ENSG00000149534;ENSG00000119121;ENSG00000168394;ENSG00000006695;ENSG00000155962;ENSG00000133657;ENSG00000105929;ENSG00000170745;ENSG00000171227;ENSG00000103375;ENSG00000125257;ENSG00000104044;ENSG00000170482;ENSG00000165474;ENSG00000135750;ENSG00000108846;ENSG00000002834;ENSG00000174343;ENSG00000155465;ENSG00000176087;ENSG00000106688;ENSG00000153898…	70	11046;10396;10165;2206;140803;6890;1352;1193;79572;50617;3790;140738;343;10257;4948;9963;2706;3775;8714;3927;55584;9056;113829;6505;255231;344905;84329;361;53827;5551;9498;206358;479;245972;7222;21;57864;523;359;51393;2705;80704;1192;3776;64116;480;57205;7781;4118;19;84239;5172;83959;80333;9058;63895;9057;10682;51090;4074;219527;2568;57153;79895;27035;5025;84061;6532;9296;127124	70	ENSG00000145936;ENSG00000130958;ENSG00000146477;ENSG00000196218;ENSG00000124406;ENSG00000004864;ENSG00000149534;ENSG00000119121;ENSG00000168394;ENSG00000240583;ENSG00000162753;ENSG00000156885;ENSG00000006695;ENSG00000154723;ENSG00000155962;ENSG00000172548;ENSG00000169282;ENSG00000133657;ENSG00000105929;ENSG00000170745;ENSG00000144935;ENSG00000171227;ENSG00000103375;ENSG00000114770;ENSG00000150625…	134	ENSG00000145936;ENSG00000146477;ENSG00000196218;ENSG00000240583;ENSG00000162753;ENSG00000156885;ENSG00000154723;ENSG00000172548;ENSG00000169282;ENSG00000144935;ENSG00000114770;ENSG00000150625;ENSG00000168275;ENSG00000100433;ENSG00000118596;ENSG00000130037;ENSG00000119899;ENSG00000055118;ENSG00000183023;ENSG00000151729;ENSG00000132958;ENSG00000183873;ENSG00000109738;ENSG00000154122;ENSG00000124067…	65	3779;6581;6261;358;284525;1339;522;348938;7881;7220;10057;2823;388753;54207;9194;3741;26503;3757;6546;291;93492;6331;2743;56172;6560;1345;4284;10060;2569;1142;783;30819;6332;6515;9498;116337;6262;5244;6508;6582;10058;6517;23155;112755;7386;6833;6568;6326;27133;10008;23516;27039;10440;348980;8604;6534;496;2247;3764;3778;782;5311;3685;6583;781	65
molecular function	nucleotide receptor activity	GO:0016502	9	2.83	0.0281	P2RX4;P2RY4;GPR174;GPR87;LPAR6;P2RY13;GPR18;GPR171;P2RY10	5025;5030;84636;53836;10161;53829;2841;29909;27334	ENSG00000135124;ENSG00000186912;ENSG00000147138;ENSG00000138271;ENSG00000139679;ENSG00000181631;ENSG00000125245;ENSG00000174946;ENSG00000078589	ENSG00000135124;ENSG00000186912;ENSG00000147138;ENSG00000138271;ENSG00000139679;ENSG00000181631;ENSG00000125245;ENSG00000174946;ENSG00000078589	9	ENSG00000135124;ENSG00000186912;ENSG00000147138;ENSG00000138271;ENSG00000139679;ENSG00000181631;ENSG00000125245;ENSG00000174946;ENSG00000078589	9	5025;5030;84636;53836;10161;53829;2841;29909;27334	9	ENSG00000135124;ENSG00000186912;ENSG00000147138;ENSG00000138271;ENSG00000139679;ENSG00000181631;ENSG00000125245;ENSG00000174946;ENSG00000078589	9		0		0
molecular function	signaling receptor activity	GO:0038023	136	1.27	0.0281	RORB;LGR5;LTBP1;PTAFR;P2RY4;CD3E;MS4A2;GPR149;PDGFRL;DNER;CD5;OR10K1;TGFBR3;CD247;GPR87;CLDN4;TLR4;PGR;THRB;GPRC5A;SELE;KCNH2;CD36;P2RY10;LEF1;OR6K3;IL13RA2;VIPR1;OR4N5;GPR174;CXCR7;CD3G;OR7E24;CXCR6;CD27;IL18R1;ABCC9;GABRR1;SORL1;LRP6;TSPAN12;CD3D;GPR82;EPHB3;FGFR4;CD79B;CALCRL;ADRB2;CD72;ROS1;GPR64;BAI3;CR1;LPAR6;CD47;CASS4;NR4A2;P2RY13;ESR1;EPHA7;ELOVL4;PTH1R;NPR2;DDR2;PTPRG;TLR10;FLT3;ABCC8;E…	6096;8549;4052;5724;5030;916;2206;344758;5157;92737;921;391109;7049;919;53836;1364;7099;5241;7068;9052;6401;3757;948;27334;51176;391114;3598;7433;390437;84636;57007;917;26648;10663;939;8809;10060;2569;6653;4040;23554;915;27197;2049;2264;974;10203;154;971;6098;10149;577;1378;10161;961;57091;4929;53829;2099;2045;6785;5745;4882;4921;5793;81793;2322;6833;2022;7098;143503;3902;92;10894;122042;221391;4…	ENSG00000198963;ENSG00000139292;ENSG00000049323;ENSG00000169403;ENSG00000186912;ENSG00000198851;ENSG00000149534;ENSG00000174948;ENSG00000104213;ENSG00000187957;ENSG00000110448;ENSG00000173285;ENSG00000069702;ENSG00000198821;ENSG00000138271;ENSG00000189143;ENSG00000136869;ENSG00000082175;ENSG00000151090;ENSG00000013588;ENSG00000007908;ENSG00000055118;ENSG00000135218;ENSG00000078589;ENSG00000138795…	ENSG00000198963;ENSG00000139292;ENSG00000049323;ENSG00000169403;ENSG00000186912;ENSG00000198851;ENSG00000149534;ENSG00000174948;ENSG00000104213;ENSG00000187957;ENSG00000110448;ENSG00000173285;ENSG00000069702;ENSG00000198821;ENSG00000138271;ENSG00000189143;ENSG00000136869;ENSG00000082175;ENSG00000151090;ENSG00000013588;ENSG00000007908;ENSG00000055118;ENSG00000135218;ENSG00000078589;ENSG00000138795…	136	ENSG00000139292;ENSG00000169403;ENSG00000186912;ENSG00000198851;ENSG00000149534;ENSG00000174948;ENSG00000110448;ENSG00000198821;ENSG00000138271;ENSG00000189143;ENSG00000136869;ENSG00000082175;ENSG00000013588;ENSG00000135218;ENSG00000078589;ENSG00000138795;ENSG00000123496;ENSG00000114812;ENSG00000147138;ENSG00000160654;ENSG00000172215;ENSG00000139193;ENSG00000115604;ENSG00000137642;ENSG00000106025…	86	8549;5724;5030;916;2206;344758;921;919;53836;1364;7099;5241;9052;948;27334;51176;3598;7433;84636;917;10663;939;8809;6653;23554;915;27197;2264;974;10203;154;971;6098;577;1378;10161;961;57091;53829;81793;2322;2022;7098;3902;10894;221391;4233;149233;6423;8993;2357;5734;929;4864;5729;2123;8416;19;1524;10261;3105;9213;10682;4074;50856;5787;2568;23765;2841;29909;960;1512;2829;80329;5025;64581;729230;39…	86	ENSG00000198963;ENSG00000139292;ENSG00000049323;ENSG00000169403;ENSG00000186912;ENSG00000198851;ENSG00000149534;ENSG00000174948;ENSG00000104213;ENSG00000187957;ENSG00000110448;ENSG00000173285;ENSG00000069702;ENSG00000198821;ENSG00000138271;ENSG00000189143;ENSG00000136869;ENSG00000082175;ENSG00000151090;ENSG00000013588;ENSG00000007908;ENSG00000055118;ENSG00000135218;ENSG00000078589;ENSG00000138795…	136	ENSG00000198963;ENSG00000049323;ENSG00000104213;ENSG00000187957;ENSG00000173285;ENSG00000069702;ENSG00000151090;ENSG00000007908;ENSG00000055118;ENSG00000203757;ENSG00000184394;ENSG00000144476;ENSG00000237521;ENSG00000069431;ENSG00000146276;ENSG00000070018;ENSG00000182580;ENSG00000173698;ENSG00000153234;ENSG00000091831;ENSG00000135333;ENSG00000118402;ENSG00000160801;ENSG00000159899;ENSG00000162733…	50	6096;4052;5157;92737;391109;7049;7068;6401;3757;391114;390437;57007;26648;10060;2569;4040;2049;10149;4929;2099;2045;6785;5745;4882;4921;5793;6833;143503;92;122042;27133;139411;54875;148738;2690;4852;50837;3590;51232;9568;3164;185;8425;2487;6424;6259;8013;7201;26692;1129	50
molecular function	purinergic nucleotide receptor activity	GO:0001614	9	2.83	0.0281	P2RX4;P2RY4;GPR174;GPR87;LPAR6;P2RY13;GPR18;GPR171;P2RY10	5025;5030;84636;53836;10161;53829;2841;29909;27334	ENSG00000135124;ENSG00000186912;ENSG00000147138;ENSG00000138271;ENSG00000139679;ENSG00000181631;ENSG00000125245;ENSG00000174946;ENSG00000078589	ENSG00000135124;ENSG00000186912;ENSG00000147138;ENSG00000138271;ENSG00000139679;ENSG00000181631;ENSG00000125245;ENSG00000174946;ENSG00000078589	9	ENSG00000135124;ENSG00000186912;ENSG00000147138;ENSG00000138271;ENSG00000139679;ENSG00000181631;ENSG00000125245;ENSG00000174946;ENSG00000078589	9	5025;5030;84636;53836;10161;53829;2841;29909;27334	9	ENSG00000135124;ENSG00000186912;ENSG00000147138;ENSG00000138271;ENSG00000139679;ENSG00000181631;ENSG00000125245;ENSG00000174946;ENSG00000078589	9		0		0
molecular function	amino acid binding	GO:0016597	24	1.82	0.0301	SHMT1;CPS1;OTC;GCLC;SESTD1;GLRB;MFGE8;FASN;CPNE6;SLC1A1;FOLR1;MGST1;GSS;SCIN;IDO1;DDAH1;MTHFS;SLC19A3;SLC46A1;SHMT2;DPEP1;ANXA9;NOS2;HDC	6470;1373;5009;2729;91404;2743;4240;2194;9362;6505;2348;4257;2937;85477;3620;23576;10588;80704;113235;6472;1800;8416;4843;3067	ENSG00000176974;ENSG00000021826;ENSG00000036473;ENSG00000001084;ENSG00000187231;ENSG00000109738;ENSG00000140545;ENSG00000169710;ENSG00000100884;ENSG00000106688;ENSG00000110195;ENSG00000008394;ENSG00000100983;ENSG00000006747;ENSG00000131203;ENSG00000153904;ENSG00000136371;ENSG00000135917;ENSG00000076351;ENSG00000182199;ENSG00000015413;ENSG00000143412;ENSG00000007171;ENSG00000140287	ENSG00000176974;ENSG00000021826;ENSG00000036473;ENSG00000001084;ENSG00000187231;ENSG00000109738;ENSG00000140545;ENSG00000169710;ENSG00000100884;ENSG00000106688;ENSG00000110195;ENSG00000008394;ENSG00000100983;ENSG00000006747;ENSG00000131203;ENSG00000153904;ENSG00000136371;ENSG00000135917;ENSG00000076351;ENSG00000182199;ENSG00000015413;ENSG00000143412;ENSG00000007171;ENSG00000140287	24	ENSG00000176974;ENSG00000001084;ENSG00000169710;ENSG00000106688;ENSG00000110195;ENSG00000008394;ENSG00000100983;ENSG00000006747;ENSG00000131203;ENSG00000136371;ENSG00000135917;ENSG00000076351;ENSG00000182199;ENSG00000015413;ENSG00000143412;ENSG00000007171;ENSG00000140287	17	6470;2729;2194;6505;2348;4257;2937;85477;3620;10588;80704;113235;6472;1800;8416;4843;3067	17	ENSG00000176974;ENSG00000021826;ENSG00000036473;ENSG00000001084;ENSG00000187231;ENSG00000109738;ENSG00000140545;ENSG00000169710;ENSG00000100884;ENSG00000106688;ENSG00000110195;ENSG00000008394;ENSG00000100983;ENSG00000006747;ENSG00000131203;ENSG00000153904;ENSG00000136371;ENSG00000135917;ENSG00000076351;ENSG00000182199;ENSG00000015413;ENSG00000143412;ENSG00000007171;ENSG00000140287	24	ENSG00000021826;ENSG00000036473;ENSG00000187231;ENSG00000109738;ENSG00000140545;ENSG00000100884;ENSG00000153904	7	1373;5009;91404;2743;4240;9362;23576	7
molecular function	serine hydrolase activity	GO:0017171	27	1.75	0.0311	FAP;GZMA;PRSS23;ST14;HTRA1;CFI;PREP;PRSS46;TMPRSS7;GZMB;GZMK;TYSND1;RHBDD1;PRSS38;RHBDL2;ZFYVE9;TPP1;NAALAD2;CPVL;CTSC;MMP8;C1RL;DPP4;KLK4;C1S;C2;CTSH	2191;3001;11098;6768;5654;3426;5550;100287362;344805;3002;3003;219743;84236;339501;54933;9372;1200;10003;54504;1075;4317;51279;1803;9622;716;717;1512	ENSG00000078098;ENSG00000145649;ENSG00000150687;ENSG00000149418;ENSG00000166033;ENSG00000205403;ENSG00000085377;ENSG00000261603;ENSG00000176040;ENSG00000100453;ENSG00000113088;ENSG00000156521;ENSG00000144468;ENSG00000185888;ENSG00000158315;ENSG00000157077;ENSG00000166340;ENSG00000077616;ENSG00000106066;ENSG00000109861;ENSG00000118113;ENSG00000139178;ENSG00000197635;ENSG00000167749;ENSG00000182326…	ENSG00000078098;ENSG00000145649;ENSG00000150687;ENSG00000149418;ENSG00000166033;ENSG00000205403;ENSG00000085377;ENSG00000261603;ENSG00000176040;ENSG00000100453;ENSG00000113088;ENSG00000156521;ENSG00000144468;ENSG00000185888;ENSG00000158315;ENSG00000157077;ENSG00000166340;ENSG00000077616;ENSG00000106066;ENSG00000109861;ENSG00000118113;ENSG00000139178;ENSG00000197635;ENSG00000167749;ENSG00000182326…	27	ENSG00000145649;ENSG00000149418;ENSG00000205403;ENSG00000085377;ENSG00000261603;ENSG00000100453;ENSG00000113088;ENSG00000156521;ENSG00000158315;ENSG00000166340;ENSG00000106066;ENSG00000109861;ENSG00000139178;ENSG00000167749;ENSG00000182326;ENSG00000166278;ENSG00000103811	17	3001;6768;3426;5550;100287362;3002;3003;219743;54933;1200;54504;1075;51279;9622;716;717;1512	17	ENSG00000078098;ENSG00000145649;ENSG00000150687;ENSG00000149418;ENSG00000166033;ENSG00000205403;ENSG00000085377;ENSG00000261603;ENSG00000176040;ENSG00000100453;ENSG00000113088;ENSG00000156521;ENSG00000144468;ENSG00000185888;ENSG00000158315;ENSG00000157077;ENSG00000166340;ENSG00000077616;ENSG00000106066;ENSG00000109861;ENSG00000118113;ENSG00000139178;ENSG00000197635;ENSG00000167749;ENSG00000182326…	27	ENSG00000078098;ENSG00000150687;ENSG00000166033;ENSG00000176040;ENSG00000144468;ENSG00000185888;ENSG00000157077;ENSG00000077616;ENSG00000118113;ENSG00000197635	10	2191;11098;5654;344805;84236;339501;9372;10003;4317;1803	10
molecular function	serine-type peptidase activity	GO:0008236	27	1.75	0.0311	FAP;GZMA;PRSS23;ST14;HTRA1;CFI;PREP;PRSS46;TMPRSS7;GZMB;GZMK;TYSND1;RHBDD1;PRSS38;RHBDL2;ZFYVE9;TPP1;NAALAD2;CPVL;CTSC;MMP8;C1RL;DPP4;KLK4;C1S;C2;CTSH	2191;3001;11098;6768;5654;3426;5550;100287362;344805;3002;3003;219743;84236;339501;54933;9372;1200;10003;54504;1075;4317;51279;1803;9622;716;717;1512	ENSG00000078098;ENSG00000145649;ENSG00000150687;ENSG00000149418;ENSG00000166033;ENSG00000205403;ENSG00000085377;ENSG00000261603;ENSG00000176040;ENSG00000100453;ENSG00000113088;ENSG00000156521;ENSG00000144468;ENSG00000185888;ENSG00000158315;ENSG00000157077;ENSG00000166340;ENSG00000077616;ENSG00000106066;ENSG00000109861;ENSG00000118113;ENSG00000139178;ENSG00000197635;ENSG00000167749;ENSG00000182326…	ENSG00000078098;ENSG00000145649;ENSG00000150687;ENSG00000149418;ENSG00000166033;ENSG00000205403;ENSG00000085377;ENSG00000261603;ENSG00000176040;ENSG00000100453;ENSG00000113088;ENSG00000156521;ENSG00000144468;ENSG00000185888;ENSG00000158315;ENSG00000157077;ENSG00000166340;ENSG00000077616;ENSG00000106066;ENSG00000109861;ENSG00000118113;ENSG00000139178;ENSG00000197635;ENSG00000167749;ENSG00000182326…	27	ENSG00000145649;ENSG00000149418;ENSG00000205403;ENSG00000085377;ENSG00000261603;ENSG00000100453;ENSG00000113088;ENSG00000156521;ENSG00000158315;ENSG00000166340;ENSG00000106066;ENSG00000109861;ENSG00000139178;ENSG00000167749;ENSG00000182326;ENSG00000166278;ENSG00000103811	17	3001;6768;3426;5550;100287362;3002;3003;219743;54933;1200;54504;1075;51279;9622;716;717;1512	17	ENSG00000078098;ENSG00000145649;ENSG00000150687;ENSG00000149418;ENSG00000166033;ENSG00000205403;ENSG00000085377;ENSG00000261603;ENSG00000176040;ENSG00000100453;ENSG00000113088;ENSG00000156521;ENSG00000144468;ENSG00000185888;ENSG00000158315;ENSG00000157077;ENSG00000166340;ENSG00000077616;ENSG00000106066;ENSG00000109861;ENSG00000118113;ENSG00000139178;ENSG00000197635;ENSG00000167749;ENSG00000182326…	27	ENSG00000078098;ENSG00000150687;ENSG00000166033;ENSG00000176040;ENSG00000144468;ENSG00000185888;ENSG00000157077;ENSG00000077616;ENSG00000118113;ENSG00000197635	10	2191;11098;5654;344805;84236;339501;9372;10003;4317;1803	10
molecular function	G-protein coupled nucleotide receptor activity	GO:0001608	8	2.94	0.032	P2RY4;GPR174;GPR87;LPAR6;P2RY13;GPR18;GPR171;P2RY10	5030;84636;53836;10161;53829;2841;29909;27334	ENSG00000186912;ENSG00000147138;ENSG00000138271;ENSG00000139679;ENSG00000181631;ENSG00000125245;ENSG00000174946;ENSG00000078589	ENSG00000186912;ENSG00000147138;ENSG00000138271;ENSG00000139679;ENSG00000181631;ENSG00000125245;ENSG00000174946;ENSG00000078589	8	ENSG00000186912;ENSG00000147138;ENSG00000138271;ENSG00000139679;ENSG00000181631;ENSG00000125245;ENSG00000174946;ENSG00000078589	8	5030;84636;53836;10161;53829;2841;29909;27334	8	ENSG00000186912;ENSG00000147138;ENSG00000138271;ENSG00000139679;ENSG00000181631;ENSG00000125245;ENSG00000174946;ENSG00000078589	8		0		0
molecular function	G-protein coupled purinergic nucleotide receptor activity	GO:0045028	8	2.94	0.032	P2RY4;GPR174;GPR87;LPAR6;P2RY13;GPR18;GPR171;P2RY10	5030;84636;53836;10161;53829;2841;29909;27334	ENSG00000186912;ENSG00000147138;ENSG00000138271;ENSG00000139679;ENSG00000181631;ENSG00000125245;ENSG00000174946;ENSG00000078589	ENSG00000186912;ENSG00000147138;ENSG00000138271;ENSG00000139679;ENSG00000181631;ENSG00000125245;ENSG00000174946;ENSG00000078589	8	ENSG00000186912;ENSG00000147138;ENSG00000138271;ENSG00000139679;ENSG00000181631;ENSG00000125245;ENSG00000174946;ENSG00000078589	8	5030;84636;53836;10161;53829;2841;29909;27334	8	ENSG00000186912;ENSG00000147138;ENSG00000138271;ENSG00000139679;ENSG00000181631;ENSG00000125245;ENSG00000174946;ENSG00000078589	8		0		0
cellular component	extracellular region	GO:0005576	325	1.55	3.08e-17	CD200R1;WIF1;ADAMDEC1;HSPG2;CD40LG;AQP1;S100A8;SCGB1A1;ADAMTS6;IL18;PDGFRL;FGG;OLFML1;PIGR;CMTM6;HAPLN1;IL12A;TGFBR3;MMP7;CTGF;QPCT;MANF;TINAGL1;THSD1;CPE;SPINK2;INSL5;RSPO1;FCRLA;IL2;PGA4;TNFSF10;SMOC2;PON1;HSD17B11;RBP4;APOH;ENPP1;UCMA;CCBE1;COL15A1;OGN;OLR1;SELP;VMO1;C5;SULF1;TNFSF8;CD27;GZMK;COL3A1;PIP;CYR61;SFTPB;SORL1;LAMB2;CASP1;INHBA;CXCL13;REG3G;PRSS23;COL4A4;VWA3A;FBN2;NPC2;CCDC134;PLA2…	131450;11197;27299;3339;959;358;6279;7356;11174;3606;5157;2266;283298;5284;54918;1404;3592;7049;4316;1490;25797;7873;64129;55901;1363;6691;10022;284654;84824;3558;643847;8743;64094;5444;51170;5950;350;5167;221044;147372;1306;4969;4973;6403;284013;727;23213;944;939;3003;1281;5304;3491;6439;6653;3913;834;3624;10563;130120;11098;1286;146177;2201;10577;79879;5320;3931;27123;25928;9982;1462;10068;2556…	ENSG00000163606;ENSG00000156076;ENSG00000134028;ENSG00000142798;ENSG00000102245;ENSG00000240583;ENSG00000143546;ENSG00000149021;ENSG00000049192;ENSG00000150782;ENSG00000104213;ENSG00000171557;ENSG00000183801;ENSG00000162896;ENSG00000091317;ENSG00000145681;ENSG00000168811;ENSG00000069702;ENSG00000137673;ENSG00000118523;ENSG00000115828;ENSG00000145050;ENSG00000142910;ENSG00000136114;ENSG00000109472…	ENSG00000163606;ENSG00000156076;ENSG00000134028;ENSG00000142798;ENSG00000102245;ENSG00000240583;ENSG00000143546;ENSG00000149021;ENSG00000049192;ENSG00000150782;ENSG00000104213;ENSG00000171557;ENSG00000183801;ENSG00000162896;ENSG00000091317;ENSG00000145681;ENSG00000168811;ENSG00000069702;ENSG00000137673;ENSG00000118523;ENSG00000115828;ENSG00000145050;ENSG00000142910;ENSG00000136114;ENSG00000109472…	325	ENSG00000163606;ENSG00000156076;ENSG00000134028;ENSG00000102245;ENSG00000143546;ENSG00000149021;ENSG00000150782;ENSG00000171557;ENSG00000162896;ENSG00000091317;ENSG00000168811;ENSG00000137673;ENSG00000145050;ENSG00000136114;ENSG00000128040;ENSG00000172410;ENSG00000169218;ENSG00000132185;ENSG00000109471;ENSG00000121858;ENSG00000005421;ENSG00000198189;ENSG00000183287;ENSG00000173391;ENSG00000174175…	193	131450;11197;27299;959;6279;7356;3606;2266;5284;54918;3592;4316;7873;55901;6691;10022;284654;84824;3558;8743;5444;51170;147372;4973;6403;284013;727;944;939;3003;5304;6439;6653;834;10563;130120;1286;146177;2201;10577;79879;5320;25928;10068;716;1800;339479;5741;130749;6768;6375;4481;3162;5341;94025;3699;1117;59084;117156;6863;51297;11081;1356;8993;6039;820;50616;4864;3627;79625;80167;6947;1636;4036…	193	ENSG00000163606;ENSG00000156076;ENSG00000134028;ENSG00000142798;ENSG00000102245;ENSG00000240583;ENSG00000143546;ENSG00000149021;ENSG00000049192;ENSG00000150782;ENSG00000104213;ENSG00000171557;ENSG00000183801;ENSG00000162896;ENSG00000091317;ENSG00000145681;ENSG00000168811;ENSG00000069702;ENSG00000137673;ENSG00000118523;ENSG00000115828;ENSG00000145050;ENSG00000142910;ENSG00000136114;ENSG00000109472…	325	ENSG00000142798;ENSG00000240583;ENSG00000049192;ENSG00000104213;ENSG00000183801;ENSG00000145681;ENSG00000069702;ENSG00000118523;ENSG00000115828;ENSG00000142910;ENSG00000109472;ENSG00000229183;ENSG00000112562;ENSG00000138207;ENSG00000091583;ENSG00000197594;ENSG00000165623;ENSG00000204291;ENSG00000106809;ENSG00000137573;ENSG00000168542;ENSG00000142871;ENSG00000172037;ENSG00000122641;ENSG00000150687…	132	3339;358;11174;5157;283298;1404;7049;1490;25797;64129;1363;643847;64094;5950;350;5167;221044;1306;4969;23213;1281;3491;3913;3624;11098;3931;27123;9982;1462;255631;1278;1842;6517;5037;7373;339501;4856;1289;4015;2191;1292;4878;7481;9365;4317;5066;9966;10468;10234;256691;3489;27286;2690;4852;7424;10893;3623;153642;57493;54360;8425;6424;81029;27122;8404;59272;83690;4052;4240;170689;29995;9510;23452;7…	132
cellular component	cell periphery	GO:0071944	599	1.32	4.82e-16	SLMAP;P2RY4;MREG;RYR1;CD40LG;DES;RECK;SLC25A13;NPHS2;AQP1;IL18;FGG;SYTL4;PIGR;HAS2;TGFBR3;SLC46A1;FUT1;CLDN4;PSD;RAB33A;CPE;BOC;MDGA1;GJB2;CAP2;BTK;HLA-DMB;AKAP12;KCNA5;TNFSF10;CD36;LCP1;SLC44A3;CD68;ENPP1;NSL1;NOD2;RELL1;TPM1;SCN5A;KLB;SHC4;CXCR7;SELP;FCRL2;SLK;GLRB;CD3G;TJP1;GPSM2;ITGB5;APH1B;SLC1A1;MIP;TJP2;RAC2;PDE6C;CACNB2;PDZK1;SPG11;FAM84B;PAQR7;PANX3;FASN;CALCRL;RYR2;ROS1;RAB27A;PLA2G4F;F…	7871;5030;55686;6261;959;1674;8434;10165;7827;358;3606;2266;94121;5284;3037;7049;113235;2523;1364;5662;9363;1363;91653;266727;2706;10486;695;3109;9590;3741;8743;948;3936;126969;968;5167;25936;64127;768211;7168;6331;152831;399694;57007;6403;79368;9748;2743;917;7082;29899;3693;83464;6505;4284;9414;5880;5146;783;5174;80208;157638;164091;116337;2194;10203;6262;6098;5873;255189;9982;53829;245972;7222;…	ENSG00000163681;ENSG00000186912;ENSG00000118242;ENSG00000196218;ENSG00000102245;ENSG00000175084;ENSG00000122707;ENSG00000004864;ENSG00000116218;ENSG00000240583;ENSG00000150782;ENSG00000171557;ENSG00000102362;ENSG00000162896;ENSG00000170961;ENSG00000069702;ENSG00000076351;ENSG00000174951;ENSG00000189143;ENSG00000059915;ENSG00000134594;ENSG00000109472;ENSG00000144857;ENSG00000112139;ENSG00000165474…	ENSG00000163681;ENSG00000186912;ENSG00000118242;ENSG00000196218;ENSG00000102245;ENSG00000175084;ENSG00000122707;ENSG00000004864;ENSG00000116218;ENSG00000240583;ENSG00000150782;ENSG00000171557;ENSG00000102362;ENSG00000162896;ENSG00000170961;ENSG00000069702;ENSG00000076351;ENSG00000174951;ENSG00000189143;ENSG00000059915;ENSG00000134594;ENSG00000109472;ENSG00000144857;ENSG00000112139;ENSG00000165474…	599	ENSG00000186912;ENSG00000118242;ENSG00000102245;ENSG00000004864;ENSG00000150782;ENSG00000171557;ENSG00000162896;ENSG00000076351;ENSG00000174951;ENSG00000189143;ENSG00000165474;ENSG00000010671;ENSG00000242574;ENSG00000121858;ENSG00000135218;ENSG00000136167;ENSG00000143036;ENSG00000129226;ENSG00000117697;ENSG00000167207;ENSG00000181826;ENSG00000134962;ENSG00000174175;ENSG00000132704;ENSG00000065613…	367	5030;55686;959;10165;3606;2266;5284;113235;2523;1364;2706;695;3109;8743;948;3936;126969;968;25936;64127;768211;152831;6403;79368;9748;917;83464;6505;9414;5880;5146;5174;80208;157638;164091;2194;10203;6098;5873;255189;53829;245972;7222;5294;2054;21;523;8796;8601;3162;10225;94025;2705;7098;752;59084;219790;6863;124404;3872;480;56253;3627;5729;129293;5172;80333;9076;54625;54845;4036;567;29851;914;94…	367	ENSG00000163681;ENSG00000186912;ENSG00000118242;ENSG00000196218;ENSG00000102245;ENSG00000175084;ENSG00000122707;ENSG00000004864;ENSG00000116218;ENSG00000240583;ENSG00000150782;ENSG00000171557;ENSG00000102362;ENSG00000162896;ENSG00000170961;ENSG00000069702;ENSG00000076351;ENSG00000174951;ENSG00000189143;ENSG00000059915;ENSG00000134594;ENSG00000109472;ENSG00000144857;ENSG00000112139;ENSG00000165474…	599	ENSG00000163681;ENSG00000196218;ENSG00000175084;ENSG00000122707;ENSG00000116218;ENSG00000240583;ENSG00000102362;ENSG00000170961;ENSG00000069702;ENSG00000059915;ENSG00000134594;ENSG00000109472;ENSG00000144857;ENSG00000112139;ENSG00000112186;ENSG00000131016;ENSG00000130037;ENSG00000197594;ENSG00000140416;ENSG00000183873;ENSG00000134962;ENSG00000185634;ENSG00000144476;ENSG00000109738;ENSG00000104067…	234	7871;6261;1674;8434;7827;358;94121;3037;7049;5662;9363;1363;91653;266727;10486;9590;3741;5167;7168;6331;152831;399694;57007;2743;7082;29899;3693;4284;783;116337;6262;9982;1000;2045;79658;10058;4921;6444;8611;4620;2191;1292;27133;51177;7481;85461;23710;23516;9966;348980;27314;6534;3696;2690;496;23189;10893;8471;57493;6424;81029;2775;3685;55811;7201;59272;1129;79901;11216;4240;53919;7881;109;8490;6…	234
cellular component	plasma membrane	GO:0005886	585	1.32	1.56e-15	SLMAP;P2RY4;MREG;RYR1;CD40LG;DES;RECK;SLC25A13;NPHS2;AQP1;IL18;FGG;SYTL4;PIGR;HAS2;TGFBR3;SLC46A1;FUT1;CLDN4;PSD;RAB33A;CPE;BOC;MDGA1;GJB2;CAP2;BTK;HLA-DMB;AKAP12;KCNA5;TNFSF10;CD36;LCP1;SLC44A3;CD68;ENPP1;NSL1;NOD2;RELL1;TPM1;SCN5A;KLB;SHC4;CXCR7;SELP;FCRL2;SLK;GLRB;CD3G;TJP1;ITGB5;APH1B;SLC1A1;MIP;TJP2;RAC2;PDE6C;CACNB2;PDZK1;SPG11;FAM84B;PAQR7;PANX3;FASN;CALCRL;RYR2;ROS1;RAB27A;PLA2G4F;FGFBP1;…	7871;5030;55686;6261;959;1674;8434;10165;7827;358;3606;2266;94121;5284;3037;7049;113235;2523;1364;5662;9363;1363;91653;266727;2706;10486;695;3109;9590;3741;8743;948;3936;126969;968;5167;25936;64127;768211;7168;6331;152831;399694;57007;6403;79368;9748;2743;917;7082;3693;83464;6505;4284;9414;5880;5146;783;5174;80208;157638;164091;116337;2194;10203;6262;6098;5873;255189;9982;53829;245972;7222;1000;2…	ENSG00000163681;ENSG00000186912;ENSG00000118242;ENSG00000196218;ENSG00000102245;ENSG00000175084;ENSG00000122707;ENSG00000004864;ENSG00000116218;ENSG00000240583;ENSG00000150782;ENSG00000171557;ENSG00000102362;ENSG00000162896;ENSG00000170961;ENSG00000069702;ENSG00000076351;ENSG00000174951;ENSG00000189143;ENSG00000059915;ENSG00000134594;ENSG00000109472;ENSG00000144857;ENSG00000112139;ENSG00000165474…	ENSG00000163681;ENSG00000186912;ENSG00000118242;ENSG00000196218;ENSG00000102245;ENSG00000175084;ENSG00000122707;ENSG00000004864;ENSG00000116218;ENSG00000240583;ENSG00000150782;ENSG00000171557;ENSG00000102362;ENSG00000162896;ENSG00000170961;ENSG00000069702;ENSG00000076351;ENSG00000174951;ENSG00000189143;ENSG00000059915;ENSG00000134594;ENSG00000109472;ENSG00000144857;ENSG00000112139;ENSG00000165474…	585	ENSG00000186912;ENSG00000118242;ENSG00000102245;ENSG00000004864;ENSG00000150782;ENSG00000171557;ENSG00000162896;ENSG00000076351;ENSG00000174951;ENSG00000189143;ENSG00000165474;ENSG00000010671;ENSG00000242574;ENSG00000121858;ENSG00000135218;ENSG00000136167;ENSG00000143036;ENSG00000129226;ENSG00000117697;ENSG00000167207;ENSG00000181826;ENSG00000134962;ENSG00000174175;ENSG00000132704;ENSG00000065613…	360	5030;55686;959;10165;3606;2266;5284;113235;2523;1364;2706;695;3109;8743;948;3936;126969;968;25936;64127;768211;152831;6403;79368;9748;917;83464;6505;9414;5880;5146;5174;80208;157638;164091;2194;10203;6098;5873;255189;53829;245972;7222;5294;2054;21;523;8796;8601;3162;10225;94025;2705;7098;752;59084;219790;6863;480;56253;3627;5729;129293;5172;80333;9076;54625;54845;4036;567;29851;914;9404;51280;578…	360	ENSG00000163681;ENSG00000186912;ENSG00000118242;ENSG00000196218;ENSG00000102245;ENSG00000175084;ENSG00000122707;ENSG00000004864;ENSG00000116218;ENSG00000240583;ENSG00000150782;ENSG00000171557;ENSG00000102362;ENSG00000162896;ENSG00000170961;ENSG00000069702;ENSG00000076351;ENSG00000174951;ENSG00000189143;ENSG00000059915;ENSG00000134594;ENSG00000109472;ENSG00000144857;ENSG00000112139;ENSG00000165474…	585	ENSG00000163681;ENSG00000196218;ENSG00000175084;ENSG00000122707;ENSG00000116218;ENSG00000240583;ENSG00000102362;ENSG00000170961;ENSG00000069702;ENSG00000059915;ENSG00000134594;ENSG00000109472;ENSG00000144857;ENSG00000112139;ENSG00000112186;ENSG00000131016;ENSG00000130037;ENSG00000197594;ENSG00000140416;ENSG00000183873;ENSG00000134962;ENSG00000185634;ENSG00000144476;ENSG00000109738;ENSG00000104067…	227	7871;6261;1674;8434;7827;358;94121;3037;7049;5662;9363;1363;91653;266727;10486;9590;3741;5167;7168;6331;152831;399694;57007;2743;7082;3693;4284;783;116337;6262;9982;1000;2045;79658;10058;4921;6444;8611;2191;1292;27133;51177;7481;85461;23710;23516;9966;348980;27314;6534;3696;2690;496;23189;10893;8471;57493;6424;81029;2775;3685;55811;7201;59272;1129;79901;11216;4240;53919;7881;109;8490;633;7052;100…	227
cellular component	extracellular region part	GO:0044421	214	1.68	1.72e-15	LTBP1;LCN2;CCL19;HSPG2;CD40LG;ADAMTS15;MFGE8;AQP1;LMCD1;S100A8;ADAMTS6;IL18;FGG;ADAMTS1;IL1A;CMTM6;HAPLN1;ANGPTL2;IL12A;LAMA3;TGFBR3;MMP7;CTGF;SFTPC;C1RL;MANF;TINAGL1;BGN;MMP13;SCARA3;GDF9;LAMA4;C3;DEFA4;COL4A3;RSPO1;SELE;TFPI;IL2;TNFSF10;SMOC2;VEGFA;PON1;DPYSL3;CXADR;RBP4;CXCL5;APOH;ENPP1;FSTL1;UCMA;CCBE1;IL8;COL15A1;OGN;FGF7;VCAM1;CLU;VWA2;IL13RA2;GRN;SERPINE2;AEBP1;LGALS3;SELP;C6;A2M;LIPH;COL8…	4052;3934;6363;3339;959;170689;4240;358;29995;6279;11174;3606;2266;9510;3552;54918;1404;23452;3592;3909;7049;4316;1490;6440;51279;7873;64129;633;4322;51435;2661;3910;718;1669;1285;284654;6401;7035;3558;8743;64094;7422;5444;1809;1525;5950;6374;350;5167;11167;221044;147372;3576;1306;4969;2252;7412;1191;340706;3598;2896;5270;165;3958;6403;729;2;200879;1295;23213;727;944;54507;1281;168667;760;6439;12…	ENSG00000049323;ENSG00000148346;ENSG00000172724;ENSG00000142798;ENSG00000102245;ENSG00000166106;ENSG00000140545;ENSG00000240583;ENSG00000071282;ENSG00000143546;ENSG00000049192;ENSG00000150782;ENSG00000171557;ENSG00000154734;ENSG00000115008;ENSG00000091317;ENSG00000145681;ENSG00000136859;ENSG00000168811;ENSG00000053747;ENSG00000069702;ENSG00000137673;ENSG00000118523;ENSG00000168484;ENSG00000139178…	ENSG00000049323;ENSG00000148346;ENSG00000172724;ENSG00000142798;ENSG00000102245;ENSG00000166106;ENSG00000140545;ENSG00000240583;ENSG00000071282;ENSG00000143546;ENSG00000049192;ENSG00000150782;ENSG00000171557;ENSG00000154734;ENSG00000115008;ENSG00000091317;ENSG00000145681;ENSG00000136859;ENSG00000168811;ENSG00000053747;ENSG00000069702;ENSG00000137673;ENSG00000118523;ENSG00000168484;ENSG00000139178…	214	ENSG00000148346;ENSG00000172724;ENSG00000102245;ENSG00000143546;ENSG00000150782;ENSG00000171557;ENSG00000115008;ENSG00000091317;ENSG00000168811;ENSG00000053747;ENSG00000137673;ENSG00000168484;ENSG00000139178;ENSG00000145050;ENSG00000137745;ENSG00000125730;ENSG00000164821;ENSG00000169031;ENSG00000169218;ENSG00000109471;ENSG00000121858;ENSG00000112715;ENSG00000005421;ENSG00000154639;ENSG00000163735…	117	3934;6363;959;6279;3606;2266;3552;54918;3592;3909;4316;6440;51279;7873;4322;718;1669;1285;284654;3558;8743;7422;5444;1525;6374;147372;3576;2252;7412;1191;340706;3598;2896;5270;3958;6403;729;2;200879;727;944;168667;760;6439;92304;6653;89780;653509;10563;1286;2201;5320;10631;25928;10068;961;1800;1118;2267;5741;3381;3600;6768;6375;4481;336;6288;3162;383;3371;10406;2022;94025;653808;1117;5005;3557;68…	117	ENSG00000049323;ENSG00000148346;ENSG00000172724;ENSG00000142798;ENSG00000102245;ENSG00000166106;ENSG00000140545;ENSG00000240583;ENSG00000071282;ENSG00000143546;ENSG00000049192;ENSG00000150782;ENSG00000171557;ENSG00000154734;ENSG00000115008;ENSG00000091317;ENSG00000145681;ENSG00000136859;ENSG00000168811;ENSG00000053747;ENSG00000069702;ENSG00000137673;ENSG00000118523;ENSG00000168484;ENSG00000139178…	214	ENSG00000049323;ENSG00000142798;ENSG00000166106;ENSG00000140545;ENSG00000240583;ENSG00000071282;ENSG00000049192;ENSG00000154734;ENSG00000145681;ENSG00000136859;ENSG00000069702;ENSG00000118523;ENSG00000142910;ENSG00000182492;ENSG00000168077;ENSG00000164404;ENSG00000112769;ENSG00000007908;ENSG00000003436;ENSG00000112562;ENSG00000113657;ENSG00000138207;ENSG00000091583;ENSG00000197594;ENSG00000163430…	97	4052;3339;170689;4240;358;29995;11174;9510;1404;23452;7049;1490;64129;633;51435;2661;3910;6401;7035;64094;1809;5950;350;5167;11167;221044;1306;4969;165;1295;23213;54507;1281;1291;7043;3913;3624;9068;3931;27123;9982;1305;1462;2069;255631;1278;1842;6517;5654;55214;5037;7148;7373;1289;389941;4016;4015;2191;1292;1290;338872;2257;5068;7481;9365;133;11341;4317;9966;10234;256691;5764;3489;148738;6678;26…	97
cellular component	plasma membrane part	GO:0044459	323	1.49	6.02e-15	SLMAP;LGR5;P2RY4;SLC22A3;MREG;RYR1;CD40LG;SLC25A13;NPHS2;AQP1;IL18;FGG;SYTL4;PIGR;HAS2;CD5;TMEM17;TGFBR3;SLC46A1;FUT1;KCNS3;CLDN4;TACSTD2;SGCE;GPRC5A;MDGA1;GJB2;HLA-DMB;KCNA5;TNFSF10;SLC17A5;HCK;CD36;SLC8A1;LCP1;GNAI1;ENPP1;SLC25A4;NCKAP1L;TPM1;DDX58;SCN5A;CHRNA9;SLC7A7;OLR1;SELP;GLRB;PRKAA1;ANKH;CD3G;C5;SSPN;TJP1;TNFSF8;CD27;ITGB5;SLC1A1;MIP;TSPAN7;PIP;CD1E;ITGA3;CACNB2;PDZK1;AQP4;SORL1;TSPAN12;…	7871;8549;5030;6581;55686;6261;959;10165;7827;358;3606;2266;94121;5284;3037;921;200728;7049;113235;2523;3790;1364;4070;8910;9052;266727;2706;3109;3741;8743;26503;3055;948;6546;3936;2770;5167;291;3071;7168;23586;6331;55584;9056;4973;6403;2743;5562;56172;917;727;8082;7082;944;939;3693;6505;4284;7102;5304;913;3675;783;5174;361;6653;23554;8777;2049;10203;971;154;10149;6809;5873;479;6708;255189;1378;6…	ENSG00000163681;ENSG00000139292;ENSG00000186912;ENSG00000146477;ENSG00000118242;ENSG00000196218;ENSG00000102245;ENSG00000004864;ENSG00000116218;ENSG00000240583;ENSG00000150782;ENSG00000171557;ENSG00000102362;ENSG00000162896;ENSG00000170961;ENSG00000110448;ENSG00000186889;ENSG00000069702;ENSG00000076351;ENSG00000174951;ENSG00000170745;ENSG00000189143;ENSG00000184292;ENSG00000127990;ENSG00000013588…	ENSG00000163681;ENSG00000139292;ENSG00000186912;ENSG00000146477;ENSG00000118242;ENSG00000196218;ENSG00000102245;ENSG00000004864;ENSG00000116218;ENSG00000240583;ENSG00000150782;ENSG00000171557;ENSG00000102362;ENSG00000162896;ENSG00000170961;ENSG00000110448;ENSG00000186889;ENSG00000069702;ENSG00000076351;ENSG00000174951;ENSG00000170745;ENSG00000189143;ENSG00000184292;ENSG00000127990;ENSG00000013588…	323	ENSG00000139292;ENSG00000186912;ENSG00000118242;ENSG00000102245;ENSG00000004864;ENSG00000150782;ENSG00000171557;ENSG00000162896;ENSG00000110448;ENSG00000076351;ENSG00000174951;ENSG00000170745;ENSG00000189143;ENSG00000184292;ENSG00000013588;ENSG00000165474;ENSG00000242574;ENSG00000121858;ENSG00000101336;ENSG00000135218;ENSG00000136167;ENSG00000123338;ENSG00000107201;ENSG00000174343;ENSG00000155465…	204	8549;5030;55686;959;10165;3606;2266;5284;921;113235;2523;3790;1364;4070;9052;2706;3109;8743;3055;948;3936;3071;23586;55584;9056;4973;6403;5562;917;727;944;939;6505;5304;3675;5174;361;6653;23554;10203;971;154;6809;5873;479;6708;255189;1378;1800;245972;7222;2054;523;6768;4481;3162;2322;5341;10225;2705;7098;3902;841;480;5588;214;4864;3627;7805;129293;5172;9076;1636;4036;10261;567;9058;29851;6714;194…	204	ENSG00000163681;ENSG00000139292;ENSG00000186912;ENSG00000146477;ENSG00000118242;ENSG00000196218;ENSG00000102245;ENSG00000004864;ENSG00000116218;ENSG00000240583;ENSG00000150782;ENSG00000171557;ENSG00000102362;ENSG00000162896;ENSG00000170961;ENSG00000110448;ENSG00000186889;ENSG00000069702;ENSG00000076351;ENSG00000174951;ENSG00000170745;ENSG00000189143;ENSG00000184292;ENSG00000127990;ENSG00000013588…	323	ENSG00000163681;ENSG00000146477;ENSG00000196218;ENSG00000116218;ENSG00000240583;ENSG00000102362;ENSG00000170961;ENSG00000186889;ENSG00000069702;ENSG00000127990;ENSG00000112139;ENSG00000130037;ENSG00000119899;ENSG00000183023;ENSG00000127955;ENSG00000197594;ENSG00000151729;ENSG00000140416;ENSG00000183873;ENSG00000109738;ENSG00000154122;ENSG00000123096;ENSG00000104067;ENSG00000082781;ENSG00000135517…	119	7871;6581;6261;7827;358;94121;3037;200728;7049;8910;266727;3741;26503;6546;2770;5167;291;7168;6331;2743;56172;8082;7082;3693;4284;7102;913;783;8777;2049;10149;6508;2045;1000;6517;4921;6444;55212;5793;8611;2191;9365;131566;23710;23516;9966;6000;6534;3696;10681;2690;54206;10253;23189;10893;9568;3778;3623;57493;6424;2775;6259;3685;7201;6583;1129;79901;3779;4240;7220;109;10057;6401;9194;3757;9630;180…	119
cellular component	extracellular space	GO:0005615	170	1.72	2.47e-13	LCN2;CCL19;HSPG2;CD40LG;MFGE8;LMCD1;S100A8;IL18;FGG;IL1A;CMTM6;ANGPTL2;IL12A;TGFBR3;MMP7;CTGF;SFTPC;C1RL;MANF;TINAGL1;MMP13;GDF9;C3;DEFA4;RSPO1;SELE;TFPI;IL2;TNFSF10;VEGFA;PON1;DPYSL3;CXADR;RBP4;CXCL5;APOH;ENPP1;FSTL1;UCMA;IL8;COL15A1;OGN;FGF7;VCAM1;CLU;IL13RA2;GRN;SERPINE2;AEBP1;SELP;C6;A2M;LIPH;SULF1;C5;TNFSF8;COL3A1;BMPER;CA2;SFTPB;TGFB3;SCGB3A1;SORL1;WNT3A;INHBA;SFTPA1;CXCL13;ANGPTL1;PLA2G2A;…	3934;6363;3339;959;4240;29995;6279;3606;2266;3552;54918;23452;3592;7049;4316;1490;6440;51279;7873;64129;4322;2661;718;1669;284654;6401;7035;3558;8743;7422;5444;1809;1525;5950;6374;350;5167;11167;221044;3576;1306;4969;2252;7412;1191;3598;2896;5270;165;6403;729;2;200879;23213;727;944;1281;168667;760;6439;7043;92304;6653;89780;3624;653509;10563;9068;5320;3931;27123;25928;9982;1462;10068;2069;1800;12…	ENSG00000148346;ENSG00000172724;ENSG00000142798;ENSG00000102245;ENSG00000140545;ENSG00000071282;ENSG00000143546;ENSG00000150782;ENSG00000171557;ENSG00000115008;ENSG00000091317;ENSG00000136859;ENSG00000168811;ENSG00000069702;ENSG00000137673;ENSG00000118523;ENSG00000168484;ENSG00000139178;ENSG00000145050;ENSG00000142910;ENSG00000137745;ENSG00000164404;ENSG00000125730;ENSG00000164821;ENSG00000169218…	ENSG00000148346;ENSG00000172724;ENSG00000142798;ENSG00000102245;ENSG00000140545;ENSG00000071282;ENSG00000143546;ENSG00000150782;ENSG00000171557;ENSG00000115008;ENSG00000091317;ENSG00000136859;ENSG00000168811;ENSG00000069702;ENSG00000137673;ENSG00000118523;ENSG00000168484;ENSG00000139178;ENSG00000145050;ENSG00000142910;ENSG00000137745;ENSG00000164404;ENSG00000125730;ENSG00000164821;ENSG00000169218…	170	ENSG00000148346;ENSG00000172724;ENSG00000102245;ENSG00000143546;ENSG00000150782;ENSG00000171557;ENSG00000115008;ENSG00000091317;ENSG00000168811;ENSG00000137673;ENSG00000168484;ENSG00000139178;ENSG00000145050;ENSG00000137745;ENSG00000125730;ENSG00000164821;ENSG00000169218;ENSG00000109471;ENSG00000121858;ENSG00000112715;ENSG00000005421;ENSG00000154639;ENSG00000163735;ENSG00000169429;ENSG00000140285…	102	3934;6363;959;6279;3606;2266;3552;54918;3592;4316;6440;51279;7873;4322;718;1669;284654;3558;8743;7422;5444;1525;6374;3576;2252;7412;1191;3598;2896;5270;6403;729;2;200879;727;944;168667;760;6439;92304;6653;89780;653509;10563;5320;25928;10068;1800;1118;2267;5741;3381;3600;6768;6375;4481;336;6288;383;3162;3371;10406;2022;94025;1117;5005;3557;6863;4233;717;1356;6423;929;50616;5199;3627;4023;1636;5552…	102	ENSG00000148346;ENSG00000172724;ENSG00000142798;ENSG00000102245;ENSG00000140545;ENSG00000071282;ENSG00000143546;ENSG00000150782;ENSG00000171557;ENSG00000115008;ENSG00000091317;ENSG00000136859;ENSG00000168811;ENSG00000069702;ENSG00000137673;ENSG00000118523;ENSG00000168484;ENSG00000139178;ENSG00000145050;ENSG00000142910;ENSG00000137745;ENSG00000164404;ENSG00000125730;ENSG00000164821;ENSG00000169218…	170	ENSG00000142798;ENSG00000140545;ENSG00000071282;ENSG00000136859;ENSG00000069702;ENSG00000118523;ENSG00000142910;ENSG00000164404;ENSG00000007908;ENSG00000003436;ENSG00000113657;ENSG00000138207;ENSG00000091583;ENSG00000197594;ENSG00000163430;ENSG00000165623;ENSG00000204291;ENSG00000106809;ENSG00000106624;ENSG00000137573;ENSG00000168542;ENSG00000119699;ENSG00000122641;ENSG00000116194;ENSG00000213398…	68	3339;4240;29995;23452;7049;1490;64129;2661;6401;7035;1809;5950;350;5167;11167;221044;1306;4969;165;23213;1281;7043;3624;9068;3931;27123;9982;1462;2069;1278;5654;5037;7148;7373;4016;4015;2191;1292;2257;5068;7481;9365;133;11341;4317;9966;10234;5764;3489;148738;6678;2690;4852;7424;10516;2247;3623;8823;54360;8425;2487;57045;2200;6424;27122;81029;8404;59272	68
cellular component	integral to plasma membrane	GO:0005887	207	1.54	1.38e-10	SLMAP;KCNMB1;LGR5;PTAFR;P2RY4;SLC22A3;RYR1;CD40LG;CD3E;SLC25A13;MS4A2;NPHS2;AQP1;PIGR;HAS2;CD5;HLA-DPA1;TGFBR3;DLL1;FUT1;KCNS3;ADCY3;TRPC1;CLDN4;TACSTD2;TLR4;AQP8;ABCC5;ITGB7;SGCE;ITGAL;GPRC5A;SLC23A1;SLC16A7;TNFSF10;KCNA5;SLC17A5;KCNH2;FLVCR1;CD36;ST3GAL5;SLC8A1;CXADR;ITGB2;MUC1;SLC25A4;NCKAP1L;KCNK1;ABCC3;VIPR1;HLA-DRA;SCN5A;CHRNA9;SLC7A7;OLR1;SELP;GLRB;C6;CD3G;ANKH;C5;SSPN;SLC12A4;TNFSF8;CXCR6…	7871;3779;8549;5724;5030;6581;6261;959;916;10165;2206;7827;358;5284;3037;921;3113;7049;28514;2523;3790;109;7220;1364;4070;7099;343;10057;3695;8910;3683;9052;9963;9194;8743;3741;26503;3757;28982;948;8869;6546;1525;3689;4582;291;3071;3775;8714;7433;3122;6331;55584;9056;4973;6403;2743;729;917;56172;727;8082;6560;944;10663;939;3693;6505;4284;7102;913;10060;2569;1601;3675;1142;783;653361;361;6653;5085…	ENSG00000163681;ENSG00000145936;ENSG00000139292;ENSG00000169403;ENSG00000186912;ENSG00000146477;ENSG00000196218;ENSG00000102245;ENSG00000198851;ENSG00000004864;ENSG00000149534;ENSG00000116218;ENSG00000240583;ENSG00000162896;ENSG00000170961;ENSG00000110448;ENSG00000231389;ENSG00000069702;ENSG00000198719;ENSG00000174951;ENSG00000170745;ENSG00000138031;ENSG00000144935;ENSG00000189143;ENSG00000184292…	ENSG00000163681;ENSG00000145936;ENSG00000139292;ENSG00000169403;ENSG00000186912;ENSG00000146477;ENSG00000196218;ENSG00000102245;ENSG00000198851;ENSG00000004864;ENSG00000149534;ENSG00000116218;ENSG00000240583;ENSG00000162896;ENSG00000170961;ENSG00000110448;ENSG00000231389;ENSG00000069702;ENSG00000198719;ENSG00000174951;ENSG00000170745;ENSG00000138031;ENSG00000144935;ENSG00000189143;ENSG00000184292…	207	ENSG00000139292;ENSG00000169403;ENSG00000186912;ENSG00000102245;ENSG00000198851;ENSG00000004864;ENSG00000149534;ENSG00000162896;ENSG00000110448;ENSG00000231389;ENSG00000198719;ENSG00000174951;ENSG00000170745;ENSG00000189143;ENSG00000184292;ENSG00000136869;ENSG00000103375;ENSG00000139626;ENSG00000005844;ENSG00000013588;ENSG00000170482;ENSG00000121858;ENSG00000162769;ENSG00000135218;ENSG00000115525…	131	8549;5724;5030;959;916;10165;2206;5284;921;3113;28514;2523;3790;1364;4070;7099;343;3695;3683;9052;9963;8743;28982;948;8869;1525;3689;4582;3071;3775;8714;7433;3122;55584;9056;4973;6403;729;917;727;944;10663;939;6505;3675;653361;361;6653;50852;23554;735;2264;1493;974;10203;154;971;479;1378;961;7222;4311;2028;3600;6768;523;4481;4067;2322;2022;10225;51393;7098;10894;3776;4233;3687;3694;149233;2315;48…	131	ENSG00000163681;ENSG00000145936;ENSG00000139292;ENSG00000169403;ENSG00000186912;ENSG00000146477;ENSG00000196218;ENSG00000102245;ENSG00000198851;ENSG00000004864;ENSG00000149534;ENSG00000116218;ENSG00000240583;ENSG00000162896;ENSG00000170961;ENSG00000110448;ENSG00000231389;ENSG00000069702;ENSG00000198719;ENSG00000174951;ENSG00000170745;ENSG00000138031;ENSG00000144935;ENSG00000189143;ENSG00000184292…	207	ENSG00000163681;ENSG00000145936;ENSG00000146477;ENSG00000196218;ENSG00000116218;ENSG00000240583;ENSG00000170961;ENSG00000069702;ENSG00000138031;ENSG00000144935;ENSG00000114770;ENSG00000127990;ENSG00000118596;ENSG00000130037;ENSG00000119899;ENSG00000055118;ENSG00000183023;ENSG00000151729;ENSG00000183873;ENSG00000109738;ENSG00000154122;ENSG00000123096;ENSG00000124067;ENSG00000082781;ENSG00000135517…	76	7871;3779;6581;6261;7827;358;3037;7049;109;7220;10057;8910;9194;3741;26503;3757;6546;291;6331;2743;56172;8082;6560;3693;4284;7102;913;10060;2569;1601;1142;783;30819;6332;2049;5244;10149;2195;6508;2069;2631;2045;6582;6517;10580;5745;4921;112755;5793;6833;8611;182;6568;92;6326;419;9365;131566;23516;9966;6534;3696;2690;10893;3590;3764;9568;3778;185;6259;5311;3685;7201;4325;6583;1129	76
cellular component	intrinsic to plasma membrane	GO:0031226	209	1.51	7.66e-10	SLMAP;KCNMB1;LGR5;PTAFR;P2RY4;SLC22A3;RYR1;CD40LG;CD3E;SLC25A13;MS4A2;NPHS2;AQP1;PIGR;HAS2;CD5;HLA-DPA1;TGFBR3;DLL1;FUT1;KCNS3;ADCY3;TRPC1;CLDN4;TACSTD2;TLR4;AQP8;ABCC5;ITGB7;SGCE;ITGAL;GPRC5A;MDGA1;SLC23A1;SLC16A7;TNFSF10;KCNA5;SLC17A5;KCNH2;FLVCR1;CD36;ST3GAL5;SLC8A1;CXADR;ITGB2;MUC1;SLC25A4;NCKAP1L;KCNK1;ABCC3;VIPR1;HLA-DRA;SCN5A;CHRNA9;SLC7A7;OLR1;SELP;GLRB;C6;CD3G;ANKH;C5;SSPN;SLC12A4;TNFSF8…	7871;3779;8549;5724;5030;6581;6261;959;916;10165;2206;7827;358;5284;3037;921;3113;7049;28514;2523;3790;109;7220;1364;4070;7099;343;10057;3695;8910;3683;9052;266727;9963;9194;8743;3741;26503;3757;28982;948;8869;6546;1525;3689;4582;291;3071;3775;8714;7433;3122;6331;55584;9056;4973;6403;2743;729;917;56172;727;8082;6560;944;10663;939;3693;6505;4284;7102;913;10060;2569;1601;3675;1142;783;653361;361;66…	ENSG00000163681;ENSG00000145936;ENSG00000139292;ENSG00000169403;ENSG00000186912;ENSG00000146477;ENSG00000196218;ENSG00000102245;ENSG00000198851;ENSG00000004864;ENSG00000149534;ENSG00000116218;ENSG00000240583;ENSG00000162896;ENSG00000170961;ENSG00000110448;ENSG00000231389;ENSG00000069702;ENSG00000198719;ENSG00000174951;ENSG00000170745;ENSG00000138031;ENSG00000144935;ENSG00000189143;ENSG00000184292…	ENSG00000163681;ENSG00000145936;ENSG00000139292;ENSG00000169403;ENSG00000186912;ENSG00000146477;ENSG00000196218;ENSG00000102245;ENSG00000198851;ENSG00000004864;ENSG00000149534;ENSG00000116218;ENSG00000240583;ENSG00000162896;ENSG00000170961;ENSG00000110448;ENSG00000231389;ENSG00000069702;ENSG00000198719;ENSG00000174951;ENSG00000170745;ENSG00000138031;ENSG00000144935;ENSG00000189143;ENSG00000184292…	209	ENSG00000139292;ENSG00000169403;ENSG00000186912;ENSG00000102245;ENSG00000198851;ENSG00000004864;ENSG00000149534;ENSG00000162896;ENSG00000110448;ENSG00000231389;ENSG00000198719;ENSG00000174951;ENSG00000170745;ENSG00000189143;ENSG00000184292;ENSG00000136869;ENSG00000103375;ENSG00000139626;ENSG00000005844;ENSG00000013588;ENSG00000170482;ENSG00000121858;ENSG00000162769;ENSG00000135218;ENSG00000115525…	132	8549;5724;5030;959;916;10165;2206;5284;921;3113;28514;2523;3790;1364;4070;7099;343;3695;3683;9052;9963;8743;28982;948;8869;1525;3689;4582;3071;3775;8714;7433;3122;55584;9056;4973;6403;729;917;727;944;10663;939;6505;3675;653361;361;6653;50852;23554;735;2264;1493;974;10203;154;971;479;6708;1378;961;7222;4311;2028;3600;6768;523;4481;4067;2322;2022;10225;51393;7098;10894;3776;4233;3687;3694;149233;23…	132	ENSG00000163681;ENSG00000145936;ENSG00000139292;ENSG00000169403;ENSG00000186912;ENSG00000146477;ENSG00000196218;ENSG00000102245;ENSG00000198851;ENSG00000004864;ENSG00000149534;ENSG00000116218;ENSG00000240583;ENSG00000162896;ENSG00000170961;ENSG00000110448;ENSG00000231389;ENSG00000069702;ENSG00000198719;ENSG00000174951;ENSG00000170745;ENSG00000138031;ENSG00000144935;ENSG00000189143;ENSG00000184292…	209	ENSG00000163681;ENSG00000145936;ENSG00000146477;ENSG00000196218;ENSG00000116218;ENSG00000240583;ENSG00000170961;ENSG00000069702;ENSG00000138031;ENSG00000144935;ENSG00000114770;ENSG00000127990;ENSG00000112139;ENSG00000118596;ENSG00000130037;ENSG00000119899;ENSG00000055118;ENSG00000183023;ENSG00000151729;ENSG00000183873;ENSG00000109738;ENSG00000154122;ENSG00000123096;ENSG00000124067;ENSG00000082781…	77	7871;3779;6581;6261;7827;358;3037;7049;109;7220;10057;8910;266727;9194;3741;26503;3757;6546;291;6331;2743;56172;8082;6560;3693;4284;7102;913;10060;2569;1601;1142;783;30819;6332;2049;5244;10149;2195;6508;2069;2631;2045;6582;6517;10580;5745;4921;112755;5793;6833;8611;182;6568;92;6326;419;9365;131566;23516;9966;6534;3696;2690;10893;3590;3764;9568;3778;185;6259;5311;3685;7201;4325;6583;1129	77
cellular component	extracellular matrix	GO:0031012	86	1.69	3.88e-06	LTBP1;HSPG2;HTRA1;LEPREL1;ADAMTS15;MFGE8;TNXB;MSR1;LMCD1;ADAMTS6;ADAMTS1;COL14A1;TNC;HAPLN1;NOV;LAMA3;TGFBR3;ZG16;MMP7;CTGF;COL5A1;C1QL3;TINAGL1;BGN;MMP13;SCARA3;LOXL1;LOX;LAMA4;KERA;COL6A2;COL5A2;COL4A3;SFRP2;C1QTNF9;MMP1;WNT11;SMOC2;VEGFA;CFP;APOH;UCMA;CCBE1;MMP8;NDNF;COL15A1;OGN;LPL;CLU;VWA2;MAMDC2;LGALS3;AEBP1;SERPINE2;COL8A1;ADAMTSL4;COL3A1;ZP1;GPC3;SPARC;COL6A1;TGFB3;LAMB2;WNT3A;SFTPA1;FBLN…	4052;3339;5654;55214;170689;4240;7148;4481;29995;11174;9510;7373;3371;1404;4856;3909;7049;653808;4316;1490;1289;389941;64129;633;4322;51435;4016;4015;3910;11081;1292;1290;1285;6423;338872;4312;7481;64094;7422;5199;350;221044;147372;4317;79625;1306;4969;4023;1191;340706;256691;3958;165;5270;1295;54507;1281;22917;2719;6678;1291;7043;3913;89780;653509;10516;10893;5359;57188;1286;2201;4958;2822;8685;…	ENSG00000049323;ENSG00000142798;ENSG00000166033;ENSG00000090530;ENSG00000166106;ENSG00000140545;ENSG00000168477;ENSG00000038945;ENSG00000071282;ENSG00000049192;ENSG00000154734;ENSG00000187955;ENSG00000041982;ENSG00000145681;ENSG00000136999;ENSG00000053747;ENSG00000069702;ENSG00000174992;ENSG00000137673;ENSG00000118523;ENSG00000130635;ENSG00000165985;ENSG00000142910;ENSG00000182492;ENSG00000137745…	ENSG00000049323;ENSG00000142798;ENSG00000166033;ENSG00000090530;ENSG00000166106;ENSG00000140545;ENSG00000168477;ENSG00000038945;ENSG00000071282;ENSG00000049192;ENSG00000154734;ENSG00000187955;ENSG00000041982;ENSG00000145681;ENSG00000136999;ENSG00000053747;ENSG00000069702;ENSG00000174992;ENSG00000137673;ENSG00000118523;ENSG00000130635;ENSG00000165985;ENSG00000142910;ENSG00000182492;ENSG00000137745…	86	ENSG00000038945;ENSG00000041982;ENSG00000053747;ENSG00000174992;ENSG00000137673;ENSG00000137745;ENSG00000139330;ENSG00000169031;ENSG00000145423;ENSG00000196611;ENSG00000112715;ENSG00000126759;ENSG00000183287;ENSG00000173376;ENSG00000175445;ENSG00000120885;ENSG00000165816;ENSG00000131981;ENSG00000135919;ENSG00000149506;ENSG00000147257;ENSG00000154342;ENSG00000122852;ENSG00000188313;ENSG00000081052…	29	4481;3371;3909;653808;4316;4322;11081;1285;6423;4312;7422;5199;147372;79625;4023;1191;340706;3958;5270;22917;2719;89780;653509;5359;1286;2201;2822;8685;10631	29	ENSG00000049323;ENSG00000142798;ENSG00000166033;ENSG00000090530;ENSG00000166106;ENSG00000140545;ENSG00000168477;ENSG00000038945;ENSG00000071282;ENSG00000049192;ENSG00000154734;ENSG00000187955;ENSG00000041982;ENSG00000145681;ENSG00000136999;ENSG00000053747;ENSG00000069702;ENSG00000174992;ENSG00000137673;ENSG00000118523;ENSG00000130635;ENSG00000165985;ENSG00000142910;ENSG00000182492;ENSG00000137745…	86	ENSG00000049323;ENSG00000142798;ENSG00000166033;ENSG00000090530;ENSG00000166106;ENSG00000140545;ENSG00000168477;ENSG00000071282;ENSG00000049192;ENSG00000154734;ENSG00000187955;ENSG00000145681;ENSG00000136999;ENSG00000069702;ENSG00000118523;ENSG00000130635;ENSG00000165985;ENSG00000142910;ENSG00000182492;ENSG00000168077;ENSG00000129038;ENSG00000113083;ENSG00000112769;ENSG00000142173;ENSG00000204262…	57	4052;3339;5654;55214;170689;4240;7148;29995;11174;9510;7373;1404;4856;7049;1490;1289;389941;64129;633;51435;4016;4015;3910;1292;1290;338872;7481;64094;350;221044;4317;1306;4969;256691;165;1295;54507;1281;6678;1291;7043;3913;10516;10893;57188;4958;170691;8425;2200;1305;1462;81029;255631;1278;8404;4325;1842	57
cellular component	membrane part	GO:0044425	730	1.14	4.6e-05	SLMAP;GXYLT2;P2RY4;ADAM19;MREG;RYR1;CD40LG;TMEM35;RECK;DNAJC3;SLC25A13;TMEM125;NPHS2;AQP1;IL18;FGG;SYTL4;SLC9C2;PIGR;HAS2;CMTM6;TGFBR3;EDEM1;SLC46A1;ATP13A3;FUT1;CLDN4;PSD;TMEM37;BOC;MDGA1;GJB2;BTK;PTPLA;HLA-DMB;KDELR3;KCNA5;TNFSF10;DCT;CD36;LCP1;SLC44A3;WSCD1;CD68;ENPP1;TMEM139;RELL1;TPM1;SCN5A;KLB;CXCR7;SELP;FCRL2;GLRB;CD3G;TJP1;COX6C;ITGB5;APH1B;SLC1A1;MIP;ATP13A5;MARCH8;SDR16C5;FAM151A;CACNB2…	7871;727936;5030;8728;55686;6261;959;59353;8434;5611;10165;128218;7827;358;3606;2266;94121;284525;5284;3037;54918;7049;9695;113235;79572;2523;1364;5662;140738;91653;266727;2706;695;9200;3109;11015;3741;8743;1638;948;3936;126969;23302;968;5167;135932;768211;7168;6331;152831;57007;6403;79368;2743;917;7082;1345;3693;83464;6505;4284;344905;220972;195814;338094;783;5174;80208;6489;26002;9961;55076;164…	ENSG00000163681;ENSG00000172986;ENSG00000186912;ENSG00000135074;ENSG00000118242;ENSG00000196218;ENSG00000102245;ENSG00000126950;ENSG00000122707;ENSG00000102580;ENSG00000004864;ENSG00000179178;ENSG00000116218;ENSG00000240583;ENSG00000150782;ENSG00000171557;ENSG00000102362;ENSG00000162753;ENSG00000162896;ENSG00000170961;ENSG00000091317;ENSG00000069702;ENSG00000134109;ENSG00000076351;ENSG00000133657…	ENSG00000163681;ENSG00000172986;ENSG00000186912;ENSG00000135074;ENSG00000118242;ENSG00000196218;ENSG00000102245;ENSG00000126950;ENSG00000122707;ENSG00000102580;ENSG00000004864;ENSG00000179178;ENSG00000116218;ENSG00000240583;ENSG00000150782;ENSG00000171557;ENSG00000102362;ENSG00000162753;ENSG00000162896;ENSG00000170961;ENSG00000091317;ENSG00000069702;ENSG00000134109;ENSG00000076351;ENSG00000133657…	730	ENSG00000186912;ENSG00000118242;ENSG00000102245;ENSG00000102580;ENSG00000004864;ENSG00000179178;ENSG00000150782;ENSG00000171557;ENSG00000162896;ENSG00000091317;ENSG00000134109;ENSG00000076351;ENSG00000133657;ENSG00000174951;ENSG00000189143;ENSG00000171227;ENSG00000165474;ENSG00000010671;ENSG00000242574;ENSG00000121858;ENSG00000135218;ENSG00000136167;ENSG00000143036;ENSG00000179314;ENSG00000129226…	450	5030;55686;959;5611;10165;128218;3606;2266;5284;54918;9695;113235;79572;2523;1364;140738;2706;695;3109;8743;948;3936;126969;23302;968;135932;768211;152831;6403;79368;917;83464;6505;344905;220972;195814;5174;80208;6489;26002;9961;164091;128346;10203;9517;6098;5873;255189;84649;53829;245972;7222;2054;21;55013;523;113402;1555;3162;266629;10225;94025;2705;7098;8564;59084;8906;29887;153830;480;56253;3…	450	ENSG00000163681;ENSG00000172986;ENSG00000186912;ENSG00000135074;ENSG00000118242;ENSG00000196218;ENSG00000102245;ENSG00000126950;ENSG00000122707;ENSG00000102580;ENSG00000004864;ENSG00000179178;ENSG00000116218;ENSG00000240583;ENSG00000150782;ENSG00000171557;ENSG00000102362;ENSG00000162753;ENSG00000162896;ENSG00000170961;ENSG00000091317;ENSG00000069702;ENSG00000134109;ENSG00000076351;ENSG00000133657…	730	ENSG00000163681;ENSG00000172986;ENSG00000135074;ENSG00000196218;ENSG00000126950;ENSG00000122707;ENSG00000116218;ENSG00000240583;ENSG00000102362;ENSG00000162753;ENSG00000170961;ENSG00000069702;ENSG00000059915;ENSG00000144857;ENSG00000112139;ENSG00000165996;ENSG00000100196;ENSG00000130037;ENSG00000080166;ENSG00000197594;ENSG00000140416;ENSG00000183873;ENSG00000134962;ENSG00000144476;ENSG00000109738…	282	7871;727936;8728;6261;59353;8434;7827;358;94121;284525;3037;7049;5662;91653;266727;9200;11015;3741;1638;5167;7168;6331;152831;57007;2743;7082;1345;3693;4284;338094;783;55076;116337;6262;51390;1374;51301;253017;5350;1000;2045;10058;57452;4921;6444;4709;23011;8611;84918;2191;54549;27133;286097;116228;23710;10008;23516;5066;51495;9966;348980;91404;6534;3696;2690;496;50837;23189;10893;64091;57493;642…	282
cellular component	contractile fiber	GO:0043292	45	1.96	4.81e-05	TNNC1;FHL3;ACTC1;LRRC10;RYR1;DES;ITGB1BP2;CASQ2;ACTN2;FLNB;NRAP;IDO1;ABCC9;CSRP3;PSMA6;MYLPF;OBSL1;SYNM;ACTA2;TRPC1;TCAP;ANKRD1;LMAN1;MYH2;MYH7;SYNPO2;MYOZ2;TPM3;KCNJ8;JPH1;RYR2;MYOT;SORBS2;MYOM1;SLC8A1;MYBPC3;MYH11;TMOD1;TRIM54;PDLIM3;ARHGEF25;SVIL;TNNT2;SYNC;TPM1	7134;2275;70;376132;6261;1674;26548;845;88;2317;4892;3620;10060;8048;5687;29895;23363;23336;59;7220;8557;27063;3998;4620;4625;171024;51778;7170;3764;56704;6262;9499;8470;8736;6546;4607;4629;7111;57159;27295;115557;6840;7139;81493;7168	ENSG00000114854;ENSG00000183386;ENSG00000159251;ENSG00000198812;ENSG00000196218;ENSG00000175084;ENSG00000147166;ENSG00000118729;ENSG00000077522;ENSG00000136068;ENSG00000197893;ENSG00000131203;ENSG00000069431;ENSG00000129170;ENSG00000100902;ENSG00000180209;ENSG00000124006;ENSG00000182253;ENSG00000107796;ENSG00000144935;ENSG00000173991;ENSG00000148677;ENSG00000074695;ENSG00000125414;ENSG00000092054…	ENSG00000114854;ENSG00000183386;ENSG00000159251;ENSG00000198812;ENSG00000196218;ENSG00000175084;ENSG00000147166;ENSG00000118729;ENSG00000077522;ENSG00000136068;ENSG00000197893;ENSG00000131203;ENSG00000069431;ENSG00000129170;ENSG00000100902;ENSG00000180209;ENSG00000124006;ENSG00000182253;ENSG00000107796;ENSG00000144935;ENSG00000173991;ENSG00000148677;ENSG00000074695;ENSG00000125414;ENSG00000092054…	45	ENSG00000131203;ENSG00000100902;ENSG00000074695;ENSG00000143549	4	3620;5687;3998;7170	4	ENSG00000114854;ENSG00000183386;ENSG00000159251;ENSG00000198812;ENSG00000196218;ENSG00000175084;ENSG00000147166;ENSG00000118729;ENSG00000077522;ENSG00000136068;ENSG00000197893;ENSG00000131203;ENSG00000069431;ENSG00000129170;ENSG00000100902;ENSG00000180209;ENSG00000124006;ENSG00000182253;ENSG00000107796;ENSG00000144935;ENSG00000173991;ENSG00000148677;ENSG00000074695;ENSG00000125414;ENSG00000092054…	45	ENSG00000114854;ENSG00000183386;ENSG00000159251;ENSG00000198812;ENSG00000196218;ENSG00000175084;ENSG00000147166;ENSG00000118729;ENSG00000077522;ENSG00000136068;ENSG00000197893;ENSG00000069431;ENSG00000129170;ENSG00000180209;ENSG00000124006;ENSG00000182253;ENSG00000107796;ENSG00000144935;ENSG00000173991;ENSG00000148677;ENSG00000125414;ENSG00000092054;ENSG00000172403;ENSG00000172399;ENSG00000121361…	41	7134;2275;70;376132;6261;1674;26548;845;88;2317;4892;10060;8048;29895;23363;23336;59;7220;8557;27063;4620;4625;171024;51778;3764;56704;6262;9499;8470;8736;6546;4607;4629;7111;57159;27295;115557;6840;7139;81493;7168	41
cellular component	proteinaceous extracellular matrix	GO:0005578	70	1.68	6.72e-05	LTBP1;HSPG2;LEPREL1;ADAMTS15;TNXB;MSR1;ADAMTS6;ADAMTS1;COL14A1;TNC;HAPLN1;LAMA3;TGFBR3;ZG16;MMP7;CTGF;COL5A1;C1QL3;BGN;MMP13;SCARA3;LOX;LAMA4;KERA;COL6A2;COL5A2;COL4A3;C1QTNF9;MMP1;WNT11;SMOC2;VEGFA;UCMA;CCBE1;MMP8;COL15A1;OGN;VWA2;MAMDC2;LGALS3;COL8A1;ADAMTSL4;ZP1;COL3A1;SPARC;GPC3;COL6A1;LAMB2;WNT3A;SFTPA1;FBLN5;MMP24;ADAMTSL3;COL4A4;FBN2;OMD;GPLD1;MARCO;ADAMTS17;POSTN;LTBP4;FBN1;COL13A1;VCAN;W…	4052;3339;55214;170689;7148;4481;11174;9510;7373;3371;1404;3909;7049;653808;4316;1490;1289;389941;633;4322;51435;4015;3910;11081;1292;1290;1285;338872;4312;7481;64094;7422;221044;147372;4317;1306;4969;340706;256691;3958;1295;54507;22917;1281;6678;2719;1291;3913;89780;653509;10516;10893;57188;1286;2201;4958;2822;8685;170691;10631;8425;2200;1305;1462;81029;255631;1278;8404;4325;1842	ENSG00000049323;ENSG00000142798;ENSG00000090530;ENSG00000166106;ENSG00000168477;ENSG00000038945;ENSG00000049192;ENSG00000154734;ENSG00000187955;ENSG00000041982;ENSG00000145681;ENSG00000053747;ENSG00000069702;ENSG00000174992;ENSG00000137673;ENSG00000118523;ENSG00000130635;ENSG00000165985;ENSG00000182492;ENSG00000137745;ENSG00000168077;ENSG00000113083;ENSG00000112769;ENSG00000139330;ENSG00000142173…	ENSG00000049323;ENSG00000142798;ENSG00000090530;ENSG00000166106;ENSG00000168477;ENSG00000038945;ENSG00000049192;ENSG00000154734;ENSG00000187955;ENSG00000041982;ENSG00000145681;ENSG00000053747;ENSG00000069702;ENSG00000174992;ENSG00000137673;ENSG00000118523;ENSG00000130635;ENSG00000165985;ENSG00000182492;ENSG00000137745;ENSG00000168077;ENSG00000113083;ENSG00000112769;ENSG00000139330;ENSG00000142173…	70	ENSG00000038945;ENSG00000041982;ENSG00000053747;ENSG00000174992;ENSG00000137673;ENSG00000137745;ENSG00000139330;ENSG00000169031;ENSG00000196611;ENSG00000112715;ENSG00000183287;ENSG00000165816;ENSG00000131981;ENSG00000149506;ENSG00000147257;ENSG00000154342;ENSG00000122852;ENSG00000081052;ENSG00000138829;ENSG00000112293;ENSG00000019169;ENSG00000133110	22	4481;3371;3909;653808;4316;4322;11081;1285;4312;7422;147372;340706;3958;22917;2719;89780;653509;1286;2201;2822;8685;10631	22	ENSG00000049323;ENSG00000142798;ENSG00000090530;ENSG00000166106;ENSG00000168477;ENSG00000038945;ENSG00000049192;ENSG00000154734;ENSG00000187955;ENSG00000041982;ENSG00000145681;ENSG00000053747;ENSG00000069702;ENSG00000174992;ENSG00000137673;ENSG00000118523;ENSG00000130635;ENSG00000165985;ENSG00000182492;ENSG00000137745;ENSG00000168077;ENSG00000113083;ENSG00000112769;ENSG00000139330;ENSG00000142173…	70	ENSG00000049323;ENSG00000142798;ENSG00000090530;ENSG00000166106;ENSG00000168477;ENSG00000049192;ENSG00000154734;ENSG00000187955;ENSG00000145681;ENSG00000069702;ENSG00000118523;ENSG00000130635;ENSG00000165985;ENSG00000182492;ENSG00000168077;ENSG00000113083;ENSG00000112769;ENSG00000142173;ENSG00000204262;ENSG00000240654;ENSG00000085741;ENSG00000112562;ENSG00000165623;ENSG00000118113;ENSG00000204291…	48	4052;3339;55214;170689;7148;11174;9510;7373;1404;7049;1490;1289;389941;633;51435;4015;3910;1292;1290;338872;7481;64094;221044;4317;1306;4969;256691;1295;54507;1281;6678;1291;3913;10516;10893;57188;4958;170691;8425;2200;1305;1462;81029;255631;1278;8404;4325;1842	48
cellular component	cell surface	GO:0009986	94	1.55	6.72e-05	STX2;SLC2A4;ENPEP;SLC46A2;CD40LG;CD3E;MS4A2;PEBP1;MFGE8;FGG;IL1A;FLT3;CD5;CD53;ENG;EPCAM;TRPV2;TGFBR3;TLR3;LAG3;SRPX;ACVR2A;BGN;ITGAX;TLR4;HSPA2;ITGAL;GPM6A;HSPA5;CLEC9A;TMEM123;CD14;FCRL6;VEGFA;CD36;ALCAM;MS4A1;DCBLD2;APOH;CXCL10;ENPP1;MUC1;NOD2;DPP4;VCAM1;LPL;ANXA9;SCN5A;HM13;SERPINE2;SELP;ACE;SELL;SULF1;B2M;CD27;ICOS;CD2;CD244;M6PR;HFE2;ITGA3;KLHL20;GHR;AQP4;TGFB3;LRP6;CLEC5A;CD44;WNT3A;TNF;AT…	2054;6517;2028;57864;959;916;2206;5037;4240;2266;3552;2322;921;963;2022;4072;51393;7049;7098;3902;8406;92;633;3687;7099;3306;3683;2823;3309;283420;114908;929;343413;7422;948;214;931;131566;350;3627;5167;4582;64127;1803;7412;4023;8416;6331;81502;5270;6403;1636;6402;23213;567;939;29851;914;51744;4074;148738;3675;27252;2690;361;7043;4040;23601;960;89780;7124;93974;962;1493;64581;3676;974;952;972;157…	ENSG00000111450;ENSG00000181856;ENSG00000138792;ENSG00000119457;ENSG00000102245;ENSG00000198851;ENSG00000149534;ENSG00000089220;ENSG00000140545;ENSG00000171557;ENSG00000115008;ENSG00000122025;ENSG00000110448;ENSG00000143119;ENSG00000106991;ENSG00000119888;ENSG00000187688;ENSG00000069702;ENSG00000164342;ENSG00000089692;ENSG00000101955;ENSG00000121989;ENSG00000182492;ENSG00000140678;ENSG00000136869…	ENSG00000111450;ENSG00000181856;ENSG00000138792;ENSG00000119457;ENSG00000102245;ENSG00000198851;ENSG00000149534;ENSG00000089220;ENSG00000140545;ENSG00000171557;ENSG00000115008;ENSG00000122025;ENSG00000110448;ENSG00000143119;ENSG00000106991;ENSG00000119888;ENSG00000187688;ENSG00000069702;ENSG00000164342;ENSG00000089692;ENSG00000101955;ENSG00000121989;ENSG00000182492;ENSG00000140678;ENSG00000136869…	94	ENSG00000111450;ENSG00000138792;ENSG00000119457;ENSG00000102245;ENSG00000198851;ENSG00000149534;ENSG00000171557;ENSG00000115008;ENSG00000122025;ENSG00000110448;ENSG00000143119;ENSG00000106991;ENSG00000119888;ENSG00000187688;ENSG00000164342;ENSG00000089692;ENSG00000140678;ENSG00000136869;ENSG00000005844;ENSG00000044574;ENSG00000197992;ENSG00000152558;ENSG00000170458;ENSG00000181036;ENSG00000112715…	65	2054;2028;57864;959;916;2206;2266;3552;2322;921;963;2022;4072;51393;7098;3902;3687;7099;3683;3309;283420;114908;929;343413;7422;948;214;931;3627;4582;64127;7412;4023;8416;81502;5270;6403;1636;6402;567;939;29851;914;51744;4074;3675;361;23601;960;89780;7124;962;1493;64581;3676;974;952;972;1576;2214;64399;5788;7852;8842;1378	65	ENSG00000111450;ENSG00000181856;ENSG00000138792;ENSG00000119457;ENSG00000102245;ENSG00000198851;ENSG00000149534;ENSG00000089220;ENSG00000140545;ENSG00000171557;ENSG00000115008;ENSG00000122025;ENSG00000110448;ENSG00000143119;ENSG00000106991;ENSG00000119888;ENSG00000187688;ENSG00000069702;ENSG00000164342;ENSG00000089692;ENSG00000101955;ENSG00000121989;ENSG00000182492;ENSG00000140678;ENSG00000136869…	94	ENSG00000181856;ENSG00000089220;ENSG00000140545;ENSG00000069702;ENSG00000101955;ENSG00000121989;ENSG00000182492;ENSG00000126803;ENSG00000150625;ENSG00000057019;ENSG00000091583;ENSG00000197594;ENSG00000197635;ENSG00000183873;ENSG00000137573;ENSG00000168509;ENSG00000076321;ENSG00000112964;ENSG00000119699;ENSG00000070018;ENSG00000130770;ENSG00000173706;ENSG00000137440;ENSG00000106483;ENSG00000111186…	29	6517;5037;4240;7049;8406;92;633;3306;2823;131566;350;5167;1803;6331;23213;148738;27252;2690;7043;4040;93974;57493;9982;6424;81029;3685;59272;7201;4325	29
cellular component	contractile fiber part	GO:0044449	41	1.95	0.0001	TNNC1;FHL3;ACTC1;RYR1;DES;ITGB1BP2;CASQ2;ACTN2;FLNB;IDO1;ABCC9;CSRP3;PSMA6;MYLPF;OBSL1;SYNM;ACTA2;TRPC1;TCAP;LMAN1;ANKRD1;MYH2;MYH7;SYNPO2;MYOZ2;TPM3;JPH1;RYR2;MYOT;SORBS2;MYOM1;SLC8A1;MYBPC3;MYH11;TRIM54;PDLIM3;ARHGEF25;SVIL;TNNT2;SYNC;TPM1	7134;2275;70;6261;1674;26548;845;88;2317;3620;10060;8048;5687;29895;23363;23336;59;7220;8557;3998;27063;4620;4625;171024;51778;7170;56704;6262;9499;8470;8736;6546;4607;4629;57159;27295;115557;6840;7139;81493;7168	ENSG00000114854;ENSG00000183386;ENSG00000159251;ENSG00000196218;ENSG00000175084;ENSG00000147166;ENSG00000118729;ENSG00000077522;ENSG00000136068;ENSG00000131203;ENSG00000069431;ENSG00000129170;ENSG00000100902;ENSG00000180209;ENSG00000124006;ENSG00000182253;ENSG00000107796;ENSG00000144935;ENSG00000173991;ENSG00000074695;ENSG00000148677;ENSG00000125414;ENSG00000092054;ENSG00000172403;ENSG00000172399…	ENSG00000114854;ENSG00000183386;ENSG00000159251;ENSG00000196218;ENSG00000175084;ENSG00000147166;ENSG00000118729;ENSG00000077522;ENSG00000136068;ENSG00000131203;ENSG00000069431;ENSG00000129170;ENSG00000100902;ENSG00000180209;ENSG00000124006;ENSG00000182253;ENSG00000107796;ENSG00000144935;ENSG00000173991;ENSG00000074695;ENSG00000148677;ENSG00000125414;ENSG00000092054;ENSG00000172403;ENSG00000172399…	41	ENSG00000131203;ENSG00000100902;ENSG00000074695;ENSG00000143549	4	3620;5687;3998;7170	4	ENSG00000114854;ENSG00000183386;ENSG00000159251;ENSG00000196218;ENSG00000175084;ENSG00000147166;ENSG00000118729;ENSG00000077522;ENSG00000136068;ENSG00000131203;ENSG00000069431;ENSG00000129170;ENSG00000100902;ENSG00000180209;ENSG00000124006;ENSG00000182253;ENSG00000107796;ENSG00000144935;ENSG00000173991;ENSG00000074695;ENSG00000148677;ENSG00000125414;ENSG00000092054;ENSG00000172403;ENSG00000172399…	41	ENSG00000114854;ENSG00000183386;ENSG00000159251;ENSG00000196218;ENSG00000175084;ENSG00000147166;ENSG00000118729;ENSG00000077522;ENSG00000136068;ENSG00000069431;ENSG00000129170;ENSG00000180209;ENSG00000124006;ENSG00000182253;ENSG00000107796;ENSG00000144935;ENSG00000173991;ENSG00000148677;ENSG00000125414;ENSG00000092054;ENSG00000172403;ENSG00000172399;ENSG00000104369;ENSG00000198626;ENSG00000120729…	37	7134;2275;70;6261;1674;26548;845;88;2317;10060;8048;29895;23363;23336;59;7220;8557;27063;4620;4625;171024;51778;56704;6262;9499;8470;8736;6546;4607;4629;57159;27295;115557;6840;7139;81493;7168	37
cellular component	myofibril	GO:0030016	41	1.91	0.0002	TNNC1;FHL3;ACTC1;LRRC10;RYR1;DES;ITGB1BP2;CASQ2;ACTN2;FLNB;NRAP;ABCC9;CSRP3;PSMA6;OBSL1;SYNM;TRPC1;TCAP;ANKRD1;LMAN1;MYH2;MYH7;SYNPO2;MYOZ2;TPM3;KCNJ8;JPH1;RYR2;MYOT;SORBS2;MYOM1;SLC8A1;MYBPC3;TMOD1;TRIM54;PDLIM3;ARHGEF25;SVIL;TNNT2;SYNC;TPM1	7134;2275;70;376132;6261;1674;26548;845;88;2317;4892;10060;8048;5687;23363;23336;7220;8557;27063;3998;4620;4625;171024;51778;7170;3764;56704;6262;9499;8470;8736;6546;4607;7111;57159;27295;115557;6840;7139;81493;7168	ENSG00000114854;ENSG00000183386;ENSG00000159251;ENSG00000198812;ENSG00000196218;ENSG00000175084;ENSG00000147166;ENSG00000118729;ENSG00000077522;ENSG00000136068;ENSG00000197893;ENSG00000069431;ENSG00000129170;ENSG00000100902;ENSG00000124006;ENSG00000182253;ENSG00000144935;ENSG00000173991;ENSG00000148677;ENSG00000074695;ENSG00000125414;ENSG00000092054;ENSG00000172403;ENSG00000172399;ENSG00000143549…	ENSG00000114854;ENSG00000183386;ENSG00000159251;ENSG00000198812;ENSG00000196218;ENSG00000175084;ENSG00000147166;ENSG00000118729;ENSG00000077522;ENSG00000136068;ENSG00000197893;ENSG00000069431;ENSG00000129170;ENSG00000100902;ENSG00000124006;ENSG00000182253;ENSG00000144935;ENSG00000173991;ENSG00000148677;ENSG00000074695;ENSG00000125414;ENSG00000092054;ENSG00000172403;ENSG00000172399;ENSG00000143549…	41	ENSG00000100902;ENSG00000074695;ENSG00000143549	3	5687;3998;7170	3	ENSG00000114854;ENSG00000183386;ENSG00000159251;ENSG00000198812;ENSG00000196218;ENSG00000175084;ENSG00000147166;ENSG00000118729;ENSG00000077522;ENSG00000136068;ENSG00000197893;ENSG00000069431;ENSG00000129170;ENSG00000100902;ENSG00000124006;ENSG00000182253;ENSG00000144935;ENSG00000173991;ENSG00000148677;ENSG00000074695;ENSG00000125414;ENSG00000092054;ENSG00000172403;ENSG00000172399;ENSG00000143549…	41	ENSG00000114854;ENSG00000183386;ENSG00000159251;ENSG00000198812;ENSG00000196218;ENSG00000175084;ENSG00000147166;ENSG00000118729;ENSG00000077522;ENSG00000136068;ENSG00000197893;ENSG00000069431;ENSG00000129170;ENSG00000124006;ENSG00000182253;ENSG00000144935;ENSG00000173991;ENSG00000148677;ENSG00000125414;ENSG00000092054;ENSG00000172403;ENSG00000172399;ENSG00000121361;ENSG00000104369;ENSG00000198626…	38	7134;2275;70;376132;6261;1674;26548;845;88;2317;4892;10060;8048;23363;23336;7220;8557;27063;4620;4625;171024;51778;3764;56704;6262;9499;8470;8736;6546;4607;7111;57159;27295;115557;6840;7139;81493;7168	38
cellular component	intrinsic to membrane	GO:0031224	627	1.14	0.0003	SLMAP;GXYLT2;P2RY4;ADAM19;RYR1;CD40LG;TMEM35;RECK;SLC25A13;TMEM125;NPHS2;AQP1;SLC9C2;PIGR;HAS2;CMTM6;TGFBR3;EDEM1;SLC46A1;ATP13A3;FUT1;CLDN4;PSD;TMEM37;BOC;MDGA1;GJB2;PTPLA;HLA-DMB;KDELR3;KCNA5;TNFSF10;DCT;CD36;SLC44A3;WSCD1;CD68;ENPP1;TMEM139;RELL1;SCN5A;KLB;CXCR7;SELP;FCRL2;GLRB;CD3G;COX6C;ITGB5;APH1B;SLC1A1;MIP;ATP13A5;MARCH8;SDR16C5;FAM151A;CACNB2;SPG11;ST8SIA1;MOXD1;MVP;TMEM45A;PAQR7;C1orf16…	7871;727936;5030;8728;6261;959;59353;8434;10165;128218;7827;358;284525;5284;3037;54918;7049;9695;113235;79572;2523;1364;5662;140738;91653;266727;2706;9200;3109;11015;3741;8743;1638;948;126969;23302;968;5167;135932;768211;6331;152831;57007;6403;79368;2743;917;1345;3693;83464;6505;4284;344905;220972;195814;338094;783;80208;6489;26002;9961;55076;164091;128346;116337;10203;6262;51390;9517;1374;6098;5…	ENSG00000163681;ENSG00000172986;ENSG00000186912;ENSG00000135074;ENSG00000196218;ENSG00000102245;ENSG00000126950;ENSG00000122707;ENSG00000004864;ENSG00000179178;ENSG00000116218;ENSG00000240583;ENSG00000162753;ENSG00000162896;ENSG00000170961;ENSG00000091317;ENSG00000069702;ENSG00000134109;ENSG00000076351;ENSG00000133657;ENSG00000174951;ENSG00000189143;ENSG00000059915;ENSG00000171227;ENSG00000144857…	ENSG00000163681;ENSG00000172986;ENSG00000186912;ENSG00000135074;ENSG00000196218;ENSG00000102245;ENSG00000126950;ENSG00000122707;ENSG00000004864;ENSG00000179178;ENSG00000116218;ENSG00000240583;ENSG00000162753;ENSG00000162896;ENSG00000170961;ENSG00000091317;ENSG00000069702;ENSG00000134109;ENSG00000076351;ENSG00000133657;ENSG00000174951;ENSG00000189143;ENSG00000059915;ENSG00000171227;ENSG00000144857…	627	ENSG00000186912;ENSG00000102245;ENSG00000004864;ENSG00000179178;ENSG00000162896;ENSG00000091317;ENSG00000134109;ENSG00000076351;ENSG00000133657;ENSG00000174951;ENSG00000189143;ENSG00000171227;ENSG00000165474;ENSG00000242574;ENSG00000121858;ENSG00000135218;ENSG00000143036;ENSG00000179314;ENSG00000129226;ENSG00000178826;ENSG00000181826;ENSG00000134962;ENSG00000174175;ENSG00000132704;ENSG00000160654…	388	5030;959;10165;128218;5284;54918;9695;113235;79572;2523;1364;140738;2706;3109;8743;948;126969;23302;968;135932;768211;152831;6403;79368;917;83464;6505;344905;220972;195814;80208;6489;26002;9961;164091;128346;10203;9517;6098;84649;53829;7222;2054;21;55013;523;113402;266629;10225;94025;2705;7098;8564;59084;153830;480;56253;5729;29927;129293;84239;5172;9076;219972;9413;4036;29851;914;8879;51280;5787…	388	ENSG00000163681;ENSG00000172986;ENSG00000186912;ENSG00000135074;ENSG00000196218;ENSG00000102245;ENSG00000126950;ENSG00000122707;ENSG00000004864;ENSG00000179178;ENSG00000116218;ENSG00000240583;ENSG00000162753;ENSG00000162896;ENSG00000170961;ENSG00000091317;ENSG00000069702;ENSG00000134109;ENSG00000076351;ENSG00000133657;ENSG00000174951;ENSG00000189143;ENSG00000059915;ENSG00000171227;ENSG00000144857…	627	ENSG00000163681;ENSG00000172986;ENSG00000135074;ENSG00000196218;ENSG00000126950;ENSG00000122707;ENSG00000116218;ENSG00000240583;ENSG00000162753;ENSG00000170961;ENSG00000069702;ENSG00000059915;ENSG00000144857;ENSG00000112139;ENSG00000165996;ENSG00000100196;ENSG00000130037;ENSG00000080166;ENSG00000197594;ENSG00000183873;ENSG00000134962;ENSG00000144476;ENSG00000109738;ENSG00000164919;ENSG00000082781…	241	7871;727936;8728;6261;59353;8434;7827;358;284525;3037;7049;5662;91653;266727;9200;11015;3741;1638;5167;6331;152831;57007;2743;1345;3693;4284;338094;783;55076;116337;6262;51390;1374;51301;253017;5350;1000;2045;10058;57452;4921;6444;4709;8611;84918;2191;54549;27133;286097;116228;10008;23516;5066;51495;9966;348980;91404;6534;3696;2690;496;50837;10893;64091;57493;3685;7201;59272;1129;79901;161145;550…	241
cellular component	membrane raft	GO:0045121	52	1.74	0.0003	STX2;SCN5A;FAIM2;SORBS1;MS4A2;NPHS2;LAMTOR3;SULF1;HMOX1;LYN;SRC;EFNB1;PLLP;ADCY3;TRPC1;GRIP1;LRP6;CASP8;WNT3A;STOML3;TLR4;TNF;CD48;RHOQ;PLSCR1;LCK;SELE;KCNMA1;BTK;CBLB;KCNA5;KRAS;CD14;ADRB2;ITLN1;HCK;CD36;NPC1;CXADR;PTPRC;SGCA;PTGS2;KIF18A;HPSE;SLC6A4;ADCY5;DPP4;PTK2B;MAL;CLN3;ACE2;ABCA1	2054;6331;23017;10580;2206;7827;8649;23213;3162;4067;6714;1947;51090;109;7220;23426;4040;841;89780;161003;7099;7124;962;23433;5359;3932;6401;3778;695;868;3741;3845;929;154;55600;3055;948;4864;1525;5788;6442;5743;81930;10855;6532;111;1803;2185;4118;1201;59272;19	ENSG00000111450;ENSG00000183873;ENSG00000135472;ENSG00000095637;ENSG00000149534;ENSG00000116218;ENSG00000109270;ENSG00000137573;ENSG00000100292;ENSG00000254087;ENSG00000197122;ENSG00000090776;ENSG00000102934;ENSG00000138031;ENSG00000144935;ENSG00000155974;ENSG00000070018;ENSG00000064012;ENSG00000154342;ENSG00000133115;ENSG00000136869;ENSG00000232810;ENSG00000117091;ENSG00000119729;ENSG00000188313…	ENSG00000111450;ENSG00000183873;ENSG00000135472;ENSG00000095637;ENSG00000149534;ENSG00000116218;ENSG00000109270;ENSG00000137573;ENSG00000100292;ENSG00000254087;ENSG00000197122;ENSG00000090776;ENSG00000102934;ENSG00000138031;ENSG00000144935;ENSG00000155974;ENSG00000070018;ENSG00000064012;ENSG00000154342;ENSG00000133115;ENSG00000136869;ENSG00000232810;ENSG00000117091;ENSG00000119729;ENSG00000188313…	52	ENSG00000111450;ENSG00000149534;ENSG00000109270;ENSG00000100292;ENSG00000254087;ENSG00000197122;ENSG00000090776;ENSG00000102934;ENSG00000064012;ENSG00000154342;ENSG00000133115;ENSG00000136869;ENSG00000232810;ENSG00000117091;ENSG00000188313;ENSG00000182866;ENSG00000010671;ENSG00000114423;ENSG00000133703;ENSG00000170458;ENSG00000169252;ENSG00000179914;ENSG00000101336;ENSG00000135218;ENSG00000141458…	34	2054;2206;8649;3162;4067;6714;1947;51090;841;89780;161003;7099;7124;962;5359;3932;695;868;3845;929;154;55600;3055;948;4864;1525;5788;81930;10855;6532;2185;4118;1201;19	34	ENSG00000111450;ENSG00000183873;ENSG00000135472;ENSG00000095637;ENSG00000149534;ENSG00000116218;ENSG00000109270;ENSG00000137573;ENSG00000100292;ENSG00000254087;ENSG00000197122;ENSG00000090776;ENSG00000102934;ENSG00000138031;ENSG00000144935;ENSG00000155974;ENSG00000070018;ENSG00000064012;ENSG00000154342;ENSG00000133115;ENSG00000136869;ENSG00000232810;ENSG00000117091;ENSG00000119729;ENSG00000188313…	52	ENSG00000183873;ENSG00000135472;ENSG00000095637;ENSG00000116218;ENSG00000137573;ENSG00000138031;ENSG00000144935;ENSG00000155974;ENSG00000070018;ENSG00000119729;ENSG00000007908;ENSG00000156113;ENSG00000130037;ENSG00000108823;ENSG00000073756;ENSG00000173175;ENSG00000197635;ENSG00000130234	18	6331;23017;10580;7827;23213;109;7220;23426;4040;23433;6401;3778;3741;6442;5743;111;1803;59272	18
cellular component	integral to membrane	GO:0016021	613	1.14	0.0004	SLMAP;GXYLT2;P2RY4;ADAM19;RYR1;CD40LG;TMEM35;SLC25A13;TMEM125;NPHS2;AQP1;SLC9C2;PIGR;HAS2;CMTM6;TGFBR3;EDEM1;SLC46A1;ATP13A3;FUT1;CLDN4;PSD;TMEM37;BOC;GJB2;PTPLA;HLA-DMB;KDELR3;KCNA5;TNFSF10;DCT;CD36;SLC44A3;WSCD1;CD68;ENPP1;TMEM139;RELL1;SCN5A;KLB;CXCR7;SELP;FCRL2;GLRB;CD3G;COX6C;ITGB5;APH1B;SLC1A1;MIP;ATP13A5;MARCH8;SDR16C5;FAM151A;CACNB2;SPG11;ST8SIA1;MOXD1;MVP;TMEM45A;PAQR7;C1orf162;PANX3;CAL…	7871;727936;5030;8728;6261;959;59353;10165;128218;7827;358;284525;5284;3037;54918;7049;9695;113235;79572;2523;1364;5662;140738;91653;2706;9200;3109;11015;3741;8743;1638;948;126969;23302;968;5167;135932;768211;6331;152831;57007;6403;79368;2743;917;1345;3693;83464;6505;4284;344905;220972;195814;338094;783;80208;6489;26002;9961;55076;164091;128346;116337;10203;6262;51390;9517;1374;6098;51301;253017;…	ENSG00000163681;ENSG00000172986;ENSG00000186912;ENSG00000135074;ENSG00000196218;ENSG00000102245;ENSG00000126950;ENSG00000004864;ENSG00000179178;ENSG00000116218;ENSG00000240583;ENSG00000162753;ENSG00000162896;ENSG00000170961;ENSG00000091317;ENSG00000069702;ENSG00000134109;ENSG00000076351;ENSG00000133657;ENSG00000174951;ENSG00000189143;ENSG00000059915;ENSG00000171227;ENSG00000144857;ENSG00000165474…	ENSG00000163681;ENSG00000172986;ENSG00000186912;ENSG00000135074;ENSG00000196218;ENSG00000102245;ENSG00000126950;ENSG00000004864;ENSG00000179178;ENSG00000116218;ENSG00000240583;ENSG00000162753;ENSG00000162896;ENSG00000170961;ENSG00000091317;ENSG00000069702;ENSG00000134109;ENSG00000076351;ENSG00000133657;ENSG00000174951;ENSG00000189143;ENSG00000059915;ENSG00000171227;ENSG00000144857;ENSG00000165474…	613	ENSG00000186912;ENSG00000102245;ENSG00000004864;ENSG00000179178;ENSG00000162896;ENSG00000091317;ENSG00000134109;ENSG00000076351;ENSG00000133657;ENSG00000174951;ENSG00000189143;ENSG00000171227;ENSG00000165474;ENSG00000242574;ENSG00000121858;ENSG00000135218;ENSG00000143036;ENSG00000179314;ENSG00000129226;ENSG00000178826;ENSG00000181826;ENSG00000134962;ENSG00000174175;ENSG00000132704;ENSG00000160654…	378	5030;959;10165;128218;5284;54918;9695;113235;79572;2523;1364;140738;2706;3109;8743;948;126969;23302;968;135932;768211;152831;6403;79368;917;83464;6505;344905;220972;195814;80208;6489;26002;9961;164091;128346;10203;9517;6098;84649;53829;7222;2054;21;55013;523;113402;266629;10225;94025;2705;7098;8564;59084;153830;480;56253;5729;29927;129293;84239;5172;9076;219972;9413;4036;29851;914;8879;51280;5787…	378	ENSG00000163681;ENSG00000172986;ENSG00000186912;ENSG00000135074;ENSG00000196218;ENSG00000102245;ENSG00000126950;ENSG00000004864;ENSG00000179178;ENSG00000116218;ENSG00000240583;ENSG00000162753;ENSG00000162896;ENSG00000170961;ENSG00000091317;ENSG00000069702;ENSG00000134109;ENSG00000076351;ENSG00000133657;ENSG00000174951;ENSG00000189143;ENSG00000059915;ENSG00000171227;ENSG00000144857;ENSG00000165474…	613	ENSG00000163681;ENSG00000172986;ENSG00000135074;ENSG00000196218;ENSG00000126950;ENSG00000116218;ENSG00000240583;ENSG00000162753;ENSG00000170961;ENSG00000069702;ENSG00000059915;ENSG00000144857;ENSG00000165996;ENSG00000100196;ENSG00000130037;ENSG00000080166;ENSG00000197594;ENSG00000183873;ENSG00000134962;ENSG00000144476;ENSG00000109738;ENSG00000164919;ENSG00000082781;ENSG00000135517;ENSG00000162391…	237	7871;727936;8728;6261;59353;7827;358;284525;3037;7049;5662;91653;9200;11015;3741;1638;5167;6331;152831;57007;2743;1345;3693;4284;338094;783;55076;116337;6262;51390;1374;51301;253017;5350;1000;2045;10058;57452;4921;6444;4709;8611;84918;2191;54549;27133;286097;116228;10008;23516;5066;51495;9966;348980;91404;6534;3696;2690;496;50837;10893;64091;57493;3685;7201;59272;1129;79901;161145;5506;2131;53919…	237
cellular component	external side of plasma membrane	GO:0009897	44	1.8	0.0006	SLC2A4;ENPEP;SERPINE2;CD40LG;ACE;SELP;CD3E;MS4A2;MFGE8;SELL;B2M;FGG;CD27;ICOS;CD2;CD244;CD5;ENG;TGFBR3;LAG3;AQP4;CD44;ITGAX;TLR4;TNF;ITGAL;CD48;CTLA4;CLEC7A;ITGA4;CD79B;TMEM123;FCRL6;ALCAM;CD36;CD74;MS4A1;FCGR3A;HEG1;PTPRC;CXCL10;CXCR4;VCAM1;ITGAV	6517;2028;5270;959;1636;6403;916;2206;4240;6402;567;2266;939;29851;914;51744;921;2022;7049;3902;361;960;3687;7099;7124;3683;962;1493;64581;3676;974;114908;343413;214;948;972;931;2214;57493;5788;3627;7852;7412;3685	ENSG00000181856;ENSG00000138792;ENSG00000135919;ENSG00000102245;ENSG00000159640;ENSG00000174175;ENSG00000198851;ENSG00000149534;ENSG00000140545;ENSG00000188404;ENSG00000166710;ENSG00000171557;ENSG00000139193;ENSG00000163600;ENSG00000116824;ENSG00000122223;ENSG00000110448;ENSG00000106991;ENSG00000069702;ENSG00000089692;ENSG00000171885;ENSG00000026508;ENSG00000140678;ENSG00000136869;ENSG00000232810…	ENSG00000181856;ENSG00000138792;ENSG00000135919;ENSG00000102245;ENSG00000159640;ENSG00000174175;ENSG00000198851;ENSG00000149534;ENSG00000140545;ENSG00000188404;ENSG00000166710;ENSG00000171557;ENSG00000139193;ENSG00000163600;ENSG00000116824;ENSG00000122223;ENSG00000110448;ENSG00000106991;ENSG00000069702;ENSG00000089692;ENSG00000171885;ENSG00000026508;ENSG00000140678;ENSG00000136869;ENSG00000232810…	44	ENSG00000138792;ENSG00000135919;ENSG00000102245;ENSG00000159640;ENSG00000174175;ENSG00000198851;ENSG00000149534;ENSG00000188404;ENSG00000166710;ENSG00000171557;ENSG00000139193;ENSG00000163600;ENSG00000116824;ENSG00000122223;ENSG00000110448;ENSG00000106991;ENSG00000089692;ENSG00000171885;ENSG00000026508;ENSG00000140678;ENSG00000136869;ENSG00000232810;ENSG00000005844;ENSG00000117091;ENSG00000163599…	39	2028;5270;959;1636;6403;916;2206;6402;567;2266;939;29851;914;51744;921;2022;3902;361;960;3687;7099;7124;3683;962;1493;64581;3676;974;114908;343413;214;948;972;931;2214;5788;3627;7852;7412	39	ENSG00000181856;ENSG00000138792;ENSG00000135919;ENSG00000102245;ENSG00000159640;ENSG00000174175;ENSG00000198851;ENSG00000149534;ENSG00000140545;ENSG00000188404;ENSG00000166710;ENSG00000171557;ENSG00000139193;ENSG00000163600;ENSG00000116824;ENSG00000122223;ENSG00000110448;ENSG00000106991;ENSG00000069702;ENSG00000089692;ENSG00000171885;ENSG00000026508;ENSG00000140678;ENSG00000136869;ENSG00000232810…	44	ENSG00000181856;ENSG00000140545;ENSG00000069702;ENSG00000173706;ENSG00000138448	5	6517;4240;7049;57493;3685	5
cellular component	MHC protein complex	GO:0042611	12	3.2	0.0007	HLA-DRA;HLA-DPA1;HLA-B;HLA-DQA1;HLA-DQB2;HLA-DMB;B2M;CD1A;HLA-DOB;CD74;HLA-A;ULBP1	3122;3113;3106;3117;3120;3109;567;909;3112;972;3105;80329	ENSG00000204287;ENSG00000231389;ENSG00000234745;ENSG00000196735;ENSG00000232629;ENSG00000242574;ENSG00000166710;ENSG00000158477;ENSG00000241106;ENSG00000019582;ENSG00000206503;ENSG00000111981	ENSG00000204287;ENSG00000231389;ENSG00000234745;ENSG00000196735;ENSG00000232629;ENSG00000242574;ENSG00000166710;ENSG00000158477;ENSG00000241106;ENSG00000019582;ENSG00000206503;ENSG00000111981	12	ENSG00000204287;ENSG00000231389;ENSG00000234745;ENSG00000196735;ENSG00000232629;ENSG00000242574;ENSG00000166710;ENSG00000158477;ENSG00000241106;ENSG00000019582;ENSG00000206503;ENSG00000111981	12	3122;3113;3106;3117;3120;3109;567;909;3112;972;3105;80329	12	ENSG00000204287;ENSG00000231389;ENSG00000234745;ENSG00000196735;ENSG00000232629;ENSG00000242574;ENSG00000166710;ENSG00000158477;ENSG00000241106;ENSG00000019582;ENSG00000206503;ENSG00000111981	12		0		0
cellular component	sarcomere	GO:0030017	35	1.91	0.0008	TNNC1;FHL3;ACTC1;RYR1;DES;ITGB1BP2;CASQ2;ACTN2;FLNB;ABCC9;CSRP3;PSMA6;OBSL1;TRPC1;TCAP;LMAN1;ANKRD1;MYH2;MYH7;MYOZ2;SYNPO2;TPM3;JPH1;RYR2;MYOT;SORBS2;MYOM1;MYBPC3;SLC8A1;TRIM54;PDLIM3;ARHGEF25;TNNT2;SYNC;TPM1	7134;2275;70;6261;1674;26548;845;88;2317;10060;8048;5687;23363;7220;8557;3998;27063;4620;4625;51778;171024;7170;56704;6262;9499;8470;8736;4607;6546;57159;27295;115557;7139;81493;7168	ENSG00000114854;ENSG00000183386;ENSG00000159251;ENSG00000196218;ENSG00000175084;ENSG00000147166;ENSG00000118729;ENSG00000077522;ENSG00000136068;ENSG00000069431;ENSG00000129170;ENSG00000100902;ENSG00000124006;ENSG00000144935;ENSG00000173991;ENSG00000074695;ENSG00000148677;ENSG00000125414;ENSG00000092054;ENSG00000172399;ENSG00000172403;ENSG00000143549;ENSG00000104369;ENSG00000198626;ENSG00000120729…	ENSG00000114854;ENSG00000183386;ENSG00000159251;ENSG00000196218;ENSG00000175084;ENSG00000147166;ENSG00000118729;ENSG00000077522;ENSG00000136068;ENSG00000069431;ENSG00000129170;ENSG00000100902;ENSG00000124006;ENSG00000144935;ENSG00000173991;ENSG00000074695;ENSG00000148677;ENSG00000125414;ENSG00000092054;ENSG00000172399;ENSG00000172403;ENSG00000143549;ENSG00000104369;ENSG00000198626;ENSG00000120729…	35	ENSG00000100902;ENSG00000074695;ENSG00000143549	3	5687;3998;7170	3	ENSG00000114854;ENSG00000183386;ENSG00000159251;ENSG00000196218;ENSG00000175084;ENSG00000147166;ENSG00000118729;ENSG00000077522;ENSG00000136068;ENSG00000069431;ENSG00000129170;ENSG00000100902;ENSG00000124006;ENSG00000144935;ENSG00000173991;ENSG00000074695;ENSG00000148677;ENSG00000125414;ENSG00000092054;ENSG00000172399;ENSG00000172403;ENSG00000143549;ENSG00000104369;ENSG00000198626;ENSG00000120729…	35	ENSG00000114854;ENSG00000183386;ENSG00000159251;ENSG00000196218;ENSG00000175084;ENSG00000147166;ENSG00000118729;ENSG00000077522;ENSG00000136068;ENSG00000069431;ENSG00000129170;ENSG00000124006;ENSG00000144935;ENSG00000173991;ENSG00000148677;ENSG00000125414;ENSG00000092054;ENSG00000172399;ENSG00000172403;ENSG00000104369;ENSG00000198626;ENSG00000120729;ENSG00000154556;ENSG00000101605;ENSG00000134571…	32	7134;2275;70;6261;1674;26548;845;88;2317;10060;8048;23363;7220;8557;27063;4620;4625;51778;171024;56704;6262;9499;8470;8736;4607;6546;57159;27295;115557;7139;81493;7168	32
cellular component	myosin filament	GO:0032982	8	4.03	0.0009	MYBPH;MYH7;MYOM2;MYOM1;MYH7B;MYH2;MYBPC3;MYH11	4608;4625;9172;8736;57644;4620;4607;4629	ENSG00000133055;ENSG00000092054;ENSG00000036448;ENSG00000101605;ENSG00000078814;ENSG00000125414;ENSG00000134571;ENSG00000133392	ENSG00000133055;ENSG00000092054;ENSG00000036448;ENSG00000101605;ENSG00000078814;ENSG00000125414;ENSG00000134571;ENSG00000133392	8	ENSG00000133055	1	4608	1	ENSG00000133055;ENSG00000092054;ENSG00000036448;ENSG00000101605;ENSG00000078814;ENSG00000125414;ENSG00000134571;ENSG00000133392	8	ENSG00000092054;ENSG00000036448;ENSG00000101605;ENSG00000078814;ENSG00000125414;ENSG00000134571;ENSG00000133392	7	4625;9172;8736;57644;4620;4607;4629	7
cellular component	membrane	GO:0016020	927	1.09	0.0009	SLMAP;GXYLT2;P2RY4;ADAM19;MREG;RYR1;CD40LG;DES;MRPS15;TMEM35;RECK;DNAJC3;SLC25A13;TMEM125;NPHS2;AQP1;IL18;FGG;SYTL4;SLC9C2;PIGR;HAS2;CMTM6;TGFBR3;EDEM1;SLC46A1;ATP13A3;FUT1;CLDN4;PSD;TMEM37;RAB33A;CPE;BOC;MDGA1;GJB2;CAP2;BTK;PTPLA;HLA-DMB;AKAP12;KDELR3;KCNA5;TNFSF10;DCT;CD36;LCP1;SLC44A3;WSCD1;CD68;ENPP1;NSL1;TMEM139;NOD2;RELL1;TPM1;SCN5A;KLB;SHC4;CXCR7;SELP;FCRL2;SLK;GLRB;CD3G;TJP1;COX6C;ITGB5;A…	7871;727936;5030;8728;55686;6261;959;1674;64960;59353;8434;5611;10165;128218;7827;358;3606;2266;94121;284525;5284;3037;54918;7049;9695;113235;79572;2523;1364;5662;140738;9363;1363;91653;266727;2706;10486;695;9200;3109;9590;11015;3741;8743;1638;948;3936;126969;23302;968;5167;25936;135932;64127;768211;7168;6331;152831;399694;57007;6403;79368;9748;2743;917;7082;1345;3693;83464;6505;4284;344905;9414;…	ENSG00000163681;ENSG00000172986;ENSG00000186912;ENSG00000135074;ENSG00000118242;ENSG00000196218;ENSG00000102245;ENSG00000175084;ENSG00000116898;ENSG00000126950;ENSG00000122707;ENSG00000102580;ENSG00000004864;ENSG00000179178;ENSG00000116218;ENSG00000240583;ENSG00000150782;ENSG00000171557;ENSG00000102362;ENSG00000162753;ENSG00000162896;ENSG00000170961;ENSG00000091317;ENSG00000069702;ENSG00000134109…	ENSG00000163681;ENSG00000172986;ENSG00000186912;ENSG00000135074;ENSG00000118242;ENSG00000196218;ENSG00000102245;ENSG00000175084;ENSG00000116898;ENSG00000126950;ENSG00000122707;ENSG00000102580;ENSG00000004864;ENSG00000179178;ENSG00000116218;ENSG00000240583;ENSG00000150782;ENSG00000171557;ENSG00000102362;ENSG00000162753;ENSG00000162896;ENSG00000170961;ENSG00000091317;ENSG00000069702;ENSG00000134109…	927	ENSG00000186912;ENSG00000118242;ENSG00000102245;ENSG00000102580;ENSG00000004864;ENSG00000179178;ENSG00000150782;ENSG00000171557;ENSG00000162896;ENSG00000091317;ENSG00000134109;ENSG00000076351;ENSG00000133657;ENSG00000174951;ENSG00000189143;ENSG00000171227;ENSG00000165474;ENSG00000010671;ENSG00000242574;ENSG00000121858;ENSG00000135218;ENSG00000136167;ENSG00000143036;ENSG00000179314;ENSG00000129226…	551	5030;55686;959;5611;10165;128218;3606;2266;5284;54918;9695;113235;79572;2523;1364;140738;2706;695;3109;8743;948;3936;126969;23302;968;25936;135932;64127;768211;152831;6403;79368;9748;917;83464;6505;344905;9414;220972;195814;5880;5146;5174;80208;93664;6489;157638;26002;9961;164091;128346;80705;2194;3158;10203;9517;6098;5873;255189;84649;53829;245972;7222;5294;2054;21;55013;523;8796;8601;113402;155…	551	ENSG00000163681;ENSG00000172986;ENSG00000186912;ENSG00000135074;ENSG00000118242;ENSG00000196218;ENSG00000102245;ENSG00000175084;ENSG00000116898;ENSG00000126950;ENSG00000122707;ENSG00000102580;ENSG00000004864;ENSG00000179178;ENSG00000116218;ENSG00000240583;ENSG00000150782;ENSG00000171557;ENSG00000102362;ENSG00000162753;ENSG00000162896;ENSG00000170961;ENSG00000091317;ENSG00000069702;ENSG00000134109…	927	ENSG00000163681;ENSG00000172986;ENSG00000135074;ENSG00000196218;ENSG00000175084;ENSG00000116898;ENSG00000126950;ENSG00000122707;ENSG00000116218;ENSG00000240583;ENSG00000102362;ENSG00000162753;ENSG00000170961;ENSG00000069702;ENSG00000059915;ENSG00000134594;ENSG00000109472;ENSG00000144857;ENSG00000112139;ENSG00000112186;ENSG00000165996;ENSG00000131016;ENSG00000100196;ENSG00000130037;ENSG00000080166…	378	7871;727936;8728;6261;1674;64960;59353;8434;7827;358;94121;284525;3037;7049;5662;9363;1363;91653;266727;10486;9200;9590;11015;3741;1638;5167;7168;6331;152831;399694;57007;2743;7082;1345;3693;4284;338094;783;55076;116337;6262;51390;1374;51301;253017;5350;9982;1000;2045;9627;79658;10058;57452;5166;4921;6444;4709;23011;8611;84918;2191;54549;1292;27133;51177;7481;85461;286097;116228;23710;10008;23516…	378
cellular component	vacuole	GO:0005773	85	1.47	0.0012	UNC93B1;ABCB6;PLBD2;HSPG2;CTSF;VAMP8;TYR;STXBP2;TPP1;HLA-DPA1;AKTIP;AQP2;TLR3;ATP6V0A4;GOT1;BGN;MMP13;TSPAN1;DLD;LAMP3;KERA;OCA2;NPPA;HOOK3;HLA-DMB;SLC17A5;HCK;LIPA;NPC1;GABARAPL1;CD68;HPSE;WIPI1;HLA-DQB2;OGN;LAPTM5;CLN3;HLA-DRA;CD1B;TMEM192;KIAA1324;TP53INP1;SRGN;LRP2;ASAH1;SRC;M6PR;SPPL2A;MARCH8;CD1E;CTSS;CTSC;GPC3;NCF1;SFTPB;MARCH1;DRAM1;AP1S3;PRF1;CTSH;MAP1LC3C;TNFAIP3;WDFY3;SLC36A1;HLA-DQA1;…	81622;10058;196463;3339;8722;8673;7299;6813;1200;3113;64400;359;7098;50617;2805;633;4322;10103;1738;27074;11081;4948;4878;84376;3109;26503;3055;3988;4864;23710;968;10855;55062;3120;4969;7805;1201;3122;910;201931;57535;94241;5552;4036;427;6714;4074;84888;220972;913;1520;1075;2719;653361;6439;55016;55332;130340;5551;1512;440738;7128;23001;206358;3117;10203;8836;10577;154;4958;972;11342;6809;5873;90…	ENSG00000110057;ENSG00000115657;ENSG00000151176;ENSG00000142798;ENSG00000174080;ENSG00000118640;ENSG00000077498;ENSG00000076944;ENSG00000166340;ENSG00000231389;ENSG00000166971;ENSG00000167580;ENSG00000164342;ENSG00000105929;ENSG00000120053;ENSG00000182492;ENSG00000137745;ENSG00000117472;ENSG00000091140;ENSG00000078081;ENSG00000139330;ENSG00000104044;ENSG00000175206;ENSG00000168172;ENSG00000242574…	ENSG00000110057;ENSG00000115657;ENSG00000151176;ENSG00000142798;ENSG00000174080;ENSG00000118640;ENSG00000077498;ENSG00000076944;ENSG00000166340;ENSG00000231389;ENSG00000166971;ENSG00000167580;ENSG00000164342;ENSG00000105929;ENSG00000120053;ENSG00000182492;ENSG00000137745;ENSG00000117472;ENSG00000091140;ENSG00000078081;ENSG00000139330;ENSG00000104044;ENSG00000175206;ENSG00000168172;ENSG00000242574…	85	ENSG00000110057;ENSG00000151176;ENSG00000118640;ENSG00000076944;ENSG00000166340;ENSG00000231389;ENSG00000167580;ENSG00000164342;ENSG00000105929;ENSG00000137745;ENSG00000117472;ENSG00000078081;ENSG00000139330;ENSG00000104044;ENSG00000168172;ENSG00000242574;ENSG00000101336;ENSG00000141458;ENSG00000129226;ENSG00000173083;ENSG00000232629;ENSG00000162511;ENSG00000188603;ENSG00000204287;ENSG00000158485…	65	81622;196463;8673;6813;1200;3113;359;7098;50617;4322;10103;27074;11081;4948;84376;3109;3055;4864;968;10855;3120;7805;1201;3122;910;201931;57535;94241;5552;4036;427;6714;4074;84888;220972;1520;1075;2719;653361;6439;55016;55332;130340;5551;1512;440738;7128;206358;3117;10203;8836;10577;154;972;6809;5873;9296;255189;1486;127124;408;245972;1118;220002;3112	65	ENSG00000110057;ENSG00000115657;ENSG00000151176;ENSG00000142798;ENSG00000174080;ENSG00000118640;ENSG00000077498;ENSG00000076944;ENSG00000166340;ENSG00000231389;ENSG00000166971;ENSG00000167580;ENSG00000164342;ENSG00000105929;ENSG00000120053;ENSG00000182492;ENSG00000137745;ENSG00000117472;ENSG00000091140;ENSG00000078081;ENSG00000139330;ENSG00000104044;ENSG00000175206;ENSG00000168172;ENSG00000242574…	85	ENSG00000115657;ENSG00000142798;ENSG00000174080;ENSG00000077498;ENSG00000166971;ENSG00000120053;ENSG00000182492;ENSG00000091140;ENSG00000175206;ENSG00000119899;ENSG00000107798;ENSG00000139112;ENSG00000070540;ENSG00000106809;ENSG00000158488;ENSG00000163625;ENSG00000127083;ENSG00000082996;ENSG00000129204;ENSG00000038427	20	10058;3339;8722;7299;64400;2805;633;1738;4878;26503;3988;23710;55062;4969;913;23001;4958;11342;9098;1462	20
cellular component	sarcolemma	GO:0042383	28	2.01	0.0013	SLMAP;SGCE;SCN5A;SLC2A4;COL6A2;RYR1;KCNJ8;DES;AQP1;SGCD;PRKCQ;SSPN;MYOT;ADRB2;SLC8A1;ABCC8;SGCA;CACNB1;CACNB2;ADCY5;COL6A1;TGFB3;VCAM1;SYNC;BGN;SCN2A;ESR1;CACNA2D1	7871;8910;6331;6517;1292;6261;3764;1674;358;6444;5588;8082;9499;154;6546;6833;6442;782;783;111;1291;7043;7412;81493;633;6326;2099;781	ENSG00000163681;ENSG00000127990;ENSG00000183873;ENSG00000181856;ENSG00000142173;ENSG00000196218;ENSG00000121361;ENSG00000175084;ENSG00000240583;ENSG00000170624;ENSG00000065675;ENSG00000123096;ENSG00000120729;ENSG00000169252;ENSG00000183023;ENSG00000006071;ENSG00000108823;ENSG00000067191;ENSG00000165995;ENSG00000173175;ENSG00000142156;ENSG00000119699;ENSG00000162692;ENSG00000162520;ENSG00000182492…	ENSG00000163681;ENSG00000127990;ENSG00000183873;ENSG00000181856;ENSG00000142173;ENSG00000196218;ENSG00000121361;ENSG00000175084;ENSG00000240583;ENSG00000170624;ENSG00000065675;ENSG00000123096;ENSG00000120729;ENSG00000169252;ENSG00000183023;ENSG00000006071;ENSG00000108823;ENSG00000067191;ENSG00000165995;ENSG00000173175;ENSG00000142156;ENSG00000119699;ENSG00000162692;ENSG00000162520;ENSG00000182492…	28	ENSG00000065675;ENSG00000169252;ENSG00000162692	3	5588;154;7412	3	ENSG00000163681;ENSG00000127990;ENSG00000183873;ENSG00000181856;ENSG00000142173;ENSG00000196218;ENSG00000121361;ENSG00000175084;ENSG00000240583;ENSG00000170624;ENSG00000065675;ENSG00000123096;ENSG00000120729;ENSG00000169252;ENSG00000183023;ENSG00000006071;ENSG00000108823;ENSG00000067191;ENSG00000165995;ENSG00000173175;ENSG00000142156;ENSG00000119699;ENSG00000162692;ENSG00000162520;ENSG00000182492…	28	ENSG00000163681;ENSG00000127990;ENSG00000183873;ENSG00000181856;ENSG00000142173;ENSG00000196218;ENSG00000121361;ENSG00000175084;ENSG00000240583;ENSG00000170624;ENSG00000123096;ENSG00000120729;ENSG00000183023;ENSG00000006071;ENSG00000108823;ENSG00000067191;ENSG00000165995;ENSG00000173175;ENSG00000142156;ENSG00000119699;ENSG00000162520;ENSG00000182492;ENSG00000136531;ENSG00000091831;ENSG00000153956	25	7871;8910;6331;6517;1292;6261;3764;1674;358;6444;8082;9499;6546;6833;6442;782;783;111;1291;7043;81493;633;6326;2099;781	25
cellular component	immunological synapse	GO:0001772	9	3.4	0.0021	ITGAL;GZMA;LCK;CD3E;ZAP70;PRKCQ;CORO1A;GZMB;CD53	3683;3001;3932;916;7535;5588;11151;3002;963	ENSG00000005844;ENSG00000145649;ENSG00000182866;ENSG00000198851;ENSG00000115085;ENSG00000065675;ENSG00000102879;ENSG00000100453;ENSG00000143119	ENSG00000005844;ENSG00000145649;ENSG00000182866;ENSG00000198851;ENSG00000115085;ENSG00000065675;ENSG00000102879;ENSG00000100453;ENSG00000143119	9	ENSG00000005844;ENSG00000145649;ENSG00000182866;ENSG00000198851;ENSG00000115085;ENSG00000065675;ENSG00000102879;ENSG00000100453;ENSG00000143119	9	3683;3001;3932;916;7535;5588;11151;3002;963	9	ENSG00000005844;ENSG00000145649;ENSG00000182866;ENSG00000198851;ENSG00000115085;ENSG00000065675;ENSG00000102879;ENSG00000100453;ENSG00000143119	9		0		0
cellular component	lytic vacuole	GO:0000323	72	1.47	0.0037	UNC93B1;PLBD2;HSPG2;CTSF;VAMP8;TYR;STXBP2;TPP1;HLA-DPA1;AQP2;TLR3;GOT1;BGN;MMP13;TSPAN1;LAMP3;KERA;OCA2;NPPA;HLA-DMB;SLC17A5;HCK;LIPA;NPC1;CD68;HPSE;HLA-DQB2;OGN;LAPTM5;CLN3;HLA-DRA;CD1B;TMEM192;KIAA1324;SRGN;LRP2;ASAH1;SRC;M6PR;SPPL2A;MARCH8;CD1E;CTSS;CTSC;GPC3;NCF1;SFTPB;MARCH1;DRAM1;AP1S3;PRF1;CTSH;TNFAIP3;SLC36A1;HLA-DQA1;CALCRL;GGH;NPC2;ADRB2;OMD;CD74;RNF13;RAB27A;STX3;USP6;PLA2G4F;VCAN;CTBS…	81622;196463;3339;8722;8673;7299;6813;1200;3113;359;7098;2805;633;4322;10103;27074;11081;4948;4878;3109;26503;3055;3988;4864;968;10855;3120;4969;7805;1201;3122;910;201931;57535;5552;4036;427;6714;4074;84888;220972;913;1520;1075;2719;653361;6439;55016;55332;130340;5551;1512;7128;206358;3117;10203;8836;10577;154;4958;972;11342;5873;6809;9098;255189;1462;1486;408;1118;220002;3112	ENSG00000110057;ENSG00000151176;ENSG00000142798;ENSG00000174080;ENSG00000118640;ENSG00000077498;ENSG00000076944;ENSG00000166340;ENSG00000231389;ENSG00000167580;ENSG00000164342;ENSG00000120053;ENSG00000182492;ENSG00000137745;ENSG00000117472;ENSG00000078081;ENSG00000139330;ENSG00000104044;ENSG00000175206;ENSG00000242574;ENSG00000119899;ENSG00000101336;ENSG00000107798;ENSG00000141458;ENSG00000129226…	ENSG00000110057;ENSG00000151176;ENSG00000142798;ENSG00000174080;ENSG00000118640;ENSG00000077498;ENSG00000076944;ENSG00000166340;ENSG00000231389;ENSG00000167580;ENSG00000164342;ENSG00000120053;ENSG00000182492;ENSG00000137745;ENSG00000117472;ENSG00000078081;ENSG00000139330;ENSG00000104044;ENSG00000175206;ENSG00000242574;ENSG00000119899;ENSG00000101336;ENSG00000107798;ENSG00000141458;ENSG00000129226…	72	ENSG00000110057;ENSG00000151176;ENSG00000118640;ENSG00000076944;ENSG00000166340;ENSG00000231389;ENSG00000167580;ENSG00000164342;ENSG00000137745;ENSG00000117472;ENSG00000078081;ENSG00000139330;ENSG00000104044;ENSG00000242574;ENSG00000101336;ENSG00000141458;ENSG00000129226;ENSG00000173083;ENSG00000232629;ENSG00000162511;ENSG00000188603;ENSG00000204287;ENSG00000158485;ENSG00000170088;ENSG00000116299…	58	81622;196463;8673;6813;1200;3113;359;7098;4322;10103;27074;11081;4948;3109;3055;4864;968;10855;3120;7805;1201;3122;910;201931;57535;5552;4036;427;6714;4074;84888;220972;1520;1075;2719;653361;6439;55016;55332;130340;5551;1512;7128;206358;3117;10203;8836;10577;154;972;5873;6809;255189;1486;408;1118;220002;3112	58	ENSG00000110057;ENSG00000151176;ENSG00000142798;ENSG00000174080;ENSG00000118640;ENSG00000077498;ENSG00000076944;ENSG00000166340;ENSG00000231389;ENSG00000167580;ENSG00000164342;ENSG00000120053;ENSG00000182492;ENSG00000137745;ENSG00000117472;ENSG00000078081;ENSG00000139330;ENSG00000104044;ENSG00000175206;ENSG00000242574;ENSG00000119899;ENSG00000101336;ENSG00000107798;ENSG00000141458;ENSG00000129226…	72	ENSG00000142798;ENSG00000174080;ENSG00000077498;ENSG00000120053;ENSG00000182492;ENSG00000175206;ENSG00000119899;ENSG00000107798;ENSG00000106809;ENSG00000158488;ENSG00000127083;ENSG00000082996;ENSG00000129204;ENSG00000038427	14	3339;8722;7299;2805;633;4878;26503;3988;4969;913;4958;11342;9098;1462	14
cellular component	collagen	GO:0005581	23	2.04	0.0037	SFTPA1;COL6A2;COL5A2;COL4A3;C1QTNF9;COL4A4;COL8A1;TNXB;MSR1;COL14A1;COL3A1;MARCO;COL13A1;CCBE1;COL5A1;COL6A1;COL15A1;COL24A1;C1QL3;COL1A2;MMP13;SCARA3;LOX	653509;1292;1290;1285;338872;1286;1295;7148;4481;7373;1281;8685;1305;147372;1289;1291;1306;255631;389941;1278;4322;51435;4015	ENSG00000122852;ENSG00000142173;ENSG00000204262;ENSG00000169031;ENSG00000240654;ENSG00000081052;ENSG00000144810;ENSG00000168477;ENSG00000038945;ENSG00000187955;ENSG00000168542;ENSG00000019169;ENSG00000197467;ENSG00000183287;ENSG00000130635;ENSG00000142156;ENSG00000204291;ENSG00000171502;ENSG00000165985;ENSG00000164692;ENSG00000137745;ENSG00000168077;ENSG00000113083	ENSG00000122852;ENSG00000142173;ENSG00000204262;ENSG00000169031;ENSG00000240654;ENSG00000081052;ENSG00000144810;ENSG00000168477;ENSG00000038945;ENSG00000187955;ENSG00000168542;ENSG00000019169;ENSG00000197467;ENSG00000183287;ENSG00000130635;ENSG00000142156;ENSG00000204291;ENSG00000171502;ENSG00000165985;ENSG00000164692;ENSG00000137745;ENSG00000168077;ENSG00000113083	23	ENSG00000122852;ENSG00000169031;ENSG00000081052;ENSG00000038945;ENSG00000019169;ENSG00000183287;ENSG00000137745	7	653509;1285;1286;4481;8685;147372;4322	7	ENSG00000122852;ENSG00000142173;ENSG00000204262;ENSG00000169031;ENSG00000240654;ENSG00000081052;ENSG00000144810;ENSG00000168477;ENSG00000038945;ENSG00000187955;ENSG00000168542;ENSG00000019169;ENSG00000197467;ENSG00000183287;ENSG00000130635;ENSG00000142156;ENSG00000204291;ENSG00000171502;ENSG00000165985;ENSG00000164692;ENSG00000137745;ENSG00000168077;ENSG00000113083	23	ENSG00000142173;ENSG00000204262;ENSG00000240654;ENSG00000144810;ENSG00000168477;ENSG00000187955;ENSG00000168542;ENSG00000197467;ENSG00000130635;ENSG00000142156;ENSG00000204291;ENSG00000171502;ENSG00000165985;ENSG00000164692;ENSG00000168077;ENSG00000113083	16	1292;1290;338872;1295;7148;7373;1281;1305;1289;1291;1306;255631;389941;1278;51435;4015	16
cellular component	lysosome	GO:0005764	72	1.47	0.0037	UNC93B1;PLBD2;HSPG2;CTSF;VAMP8;TYR;STXBP2;TPP1;HLA-DPA1;AQP2;TLR3;GOT1;BGN;MMP13;TSPAN1;LAMP3;KERA;OCA2;NPPA;HLA-DMB;SLC17A5;HCK;LIPA;NPC1;CD68;HPSE;HLA-DQB2;OGN;LAPTM5;CLN3;HLA-DRA;CD1B;TMEM192;KIAA1324;SRGN;LRP2;ASAH1;SRC;M6PR;SPPL2A;MARCH8;CD1E;CTSS;CTSC;GPC3;NCF1;SFTPB;MARCH1;DRAM1;AP1S3;PRF1;CTSH;TNFAIP3;SLC36A1;HLA-DQA1;CALCRL;GGH;NPC2;ADRB2;OMD;CD74;RNF13;RAB27A;STX3;USP6;PLA2G4F;VCAN;CTBS…	81622;196463;3339;8722;8673;7299;6813;1200;3113;359;7098;2805;633;4322;10103;27074;11081;4948;4878;3109;26503;3055;3988;4864;968;10855;3120;4969;7805;1201;3122;910;201931;57535;5552;4036;427;6714;4074;84888;220972;913;1520;1075;2719;653361;6439;55016;55332;130340;5551;1512;7128;206358;3117;10203;8836;10577;154;4958;972;11342;5873;6809;9098;255189;1462;1486;408;1118;220002;3112	ENSG00000110057;ENSG00000151176;ENSG00000142798;ENSG00000174080;ENSG00000118640;ENSG00000077498;ENSG00000076944;ENSG00000166340;ENSG00000231389;ENSG00000167580;ENSG00000164342;ENSG00000120053;ENSG00000182492;ENSG00000137745;ENSG00000117472;ENSG00000078081;ENSG00000139330;ENSG00000104044;ENSG00000175206;ENSG00000242574;ENSG00000119899;ENSG00000101336;ENSG00000107798;ENSG00000141458;ENSG00000129226…	ENSG00000110057;ENSG00000151176;ENSG00000142798;ENSG00000174080;ENSG00000118640;ENSG00000077498;ENSG00000076944;ENSG00000166340;ENSG00000231389;ENSG00000167580;ENSG00000164342;ENSG00000120053;ENSG00000182492;ENSG00000137745;ENSG00000117472;ENSG00000078081;ENSG00000139330;ENSG00000104044;ENSG00000175206;ENSG00000242574;ENSG00000119899;ENSG00000101336;ENSG00000107798;ENSG00000141458;ENSG00000129226…	72	ENSG00000110057;ENSG00000151176;ENSG00000118640;ENSG00000076944;ENSG00000166340;ENSG00000231389;ENSG00000167580;ENSG00000164342;ENSG00000137745;ENSG00000117472;ENSG00000078081;ENSG00000139330;ENSG00000104044;ENSG00000242574;ENSG00000101336;ENSG00000141458;ENSG00000129226;ENSG00000173083;ENSG00000232629;ENSG00000162511;ENSG00000188603;ENSG00000204287;ENSG00000158485;ENSG00000170088;ENSG00000116299…	58	81622;196463;8673;6813;1200;3113;359;7098;4322;10103;27074;11081;4948;3109;3055;4864;968;10855;3120;7805;1201;3122;910;201931;57535;5552;4036;427;6714;4074;84888;220972;1520;1075;2719;653361;6439;55016;55332;130340;5551;1512;7128;206358;3117;10203;8836;10577;154;972;5873;6809;255189;1486;408;1118;220002;3112	58	ENSG00000110057;ENSG00000151176;ENSG00000142798;ENSG00000174080;ENSG00000118640;ENSG00000077498;ENSG00000076944;ENSG00000166340;ENSG00000231389;ENSG00000167580;ENSG00000164342;ENSG00000120053;ENSG00000182492;ENSG00000137745;ENSG00000117472;ENSG00000078081;ENSG00000139330;ENSG00000104044;ENSG00000175206;ENSG00000242574;ENSG00000119899;ENSG00000101336;ENSG00000107798;ENSG00000141458;ENSG00000129226…	72	ENSG00000142798;ENSG00000174080;ENSG00000077498;ENSG00000120053;ENSG00000182492;ENSG00000175206;ENSG00000119899;ENSG00000107798;ENSG00000106809;ENSG00000158488;ENSG00000127083;ENSG00000082996;ENSG00000129204;ENSG00000038427	14	3339;8722;7299;2805;633;4878;26503;3988;4969;913;4958;11342;9098;1462	14
cellular component	integral to lumenal side of endoplasmic reticulum membrane	GO:0071556	10	3.02	0.0053	HLA-DRA;HLA-DPA1;HLA-B;HM13;HLA-DQA1;HLA-DQB2;PKD2;CD74;HLA-A;SPPL2A	3122;3113;3106;81502;3117;3120;5311;972;3105;84888	ENSG00000204287;ENSG00000231389;ENSG00000234745;ENSG00000101294;ENSG00000196735;ENSG00000232629;ENSG00000118762;ENSG00000019582;ENSG00000206503;ENSG00000138600	ENSG00000204287;ENSG00000231389;ENSG00000234745;ENSG00000101294;ENSG00000196735;ENSG00000232629;ENSG00000118762;ENSG00000019582;ENSG00000206503;ENSG00000138600	10	ENSG00000204287;ENSG00000231389;ENSG00000234745;ENSG00000101294;ENSG00000196735;ENSG00000232629;ENSG00000019582;ENSG00000206503;ENSG00000138600	9	3122;3113;3106;81502;3117;3120;972;3105;84888	9	ENSG00000204287;ENSG00000231389;ENSG00000234745;ENSG00000101294;ENSG00000196735;ENSG00000232629;ENSG00000118762;ENSG00000019582;ENSG00000206503;ENSG00000138600	10	ENSG00000118762	1	5311	1
cellular component	extracellular matrix part	GO:0044420	37	1.69	0.0069	HSPG2;LEPREL1;COL8A1;TNXB;MSR1;ADAMTS1;COL14A1;COL3A1;TNC;LAMA3;SPARC;COL5A1;COL6A1;C1QL3;LAMB2;SCARA3;MMP13;LOX;LAMA4;SFTPA1;COL6A2;FBLN5;COL5A2;COL4A3;C1QTNF9;COL4A4;FBN2;VEGFA;SMOC2;MARCO;FBN1;COL13A1;CCBE1;COL15A1;COL24A1;COL1A2;VWA2	3339;55214;1295;7148;4481;9510;7373;1281;3371;3909;6678;1289;1291;389941;3913;51435;4322;4015;3910;653509;1292;10516;1290;1285;338872;1286;2201;7422;64094;8685;2200;1305;147372;1306;255631;1278;340706	ENSG00000142798;ENSG00000090530;ENSG00000144810;ENSG00000168477;ENSG00000038945;ENSG00000154734;ENSG00000187955;ENSG00000168542;ENSG00000041982;ENSG00000053747;ENSG00000113140;ENSG00000130635;ENSG00000142156;ENSG00000165985;ENSG00000172037;ENSG00000168077;ENSG00000137745;ENSG00000113083;ENSG00000112769;ENSG00000122852;ENSG00000142173;ENSG00000140092;ENSG00000204262;ENSG00000169031;ENSG00000240654…	ENSG00000142798;ENSG00000090530;ENSG00000144810;ENSG00000168477;ENSG00000038945;ENSG00000154734;ENSG00000187955;ENSG00000168542;ENSG00000041982;ENSG00000053747;ENSG00000113140;ENSG00000130635;ENSG00000142156;ENSG00000165985;ENSG00000172037;ENSG00000168077;ENSG00000137745;ENSG00000113083;ENSG00000112769;ENSG00000122852;ENSG00000142173;ENSG00000140092;ENSG00000204262;ENSG00000169031;ENSG00000240654…	37	ENSG00000038945;ENSG00000041982;ENSG00000053747;ENSG00000137745;ENSG00000122852;ENSG00000169031;ENSG00000081052;ENSG00000138829;ENSG00000112715;ENSG00000019169;ENSG00000183287;ENSG00000165816	12	4481;3371;3909;4322;653509;1285;1286;2201;7422;8685;147372;340706	12	ENSG00000142798;ENSG00000090530;ENSG00000144810;ENSG00000168477;ENSG00000038945;ENSG00000154734;ENSG00000187955;ENSG00000168542;ENSG00000041982;ENSG00000053747;ENSG00000113140;ENSG00000130635;ENSG00000142156;ENSG00000165985;ENSG00000172037;ENSG00000168077;ENSG00000137745;ENSG00000113083;ENSG00000112769;ENSG00000122852;ENSG00000142173;ENSG00000140092;ENSG00000204262;ENSG00000169031;ENSG00000240654…	37	ENSG00000142798;ENSG00000090530;ENSG00000144810;ENSG00000168477;ENSG00000154734;ENSG00000187955;ENSG00000168542;ENSG00000113140;ENSG00000130635;ENSG00000142156;ENSG00000165985;ENSG00000172037;ENSG00000168077;ENSG00000113083;ENSG00000112769;ENSG00000142173;ENSG00000140092;ENSG00000204262;ENSG00000240654;ENSG00000112562;ENSG00000166147;ENSG00000197467;ENSG00000204291;ENSG00000171502;ENSG00000164692	25	3339;55214;1295;7148;9510;7373;1281;6678;1289;1291;389941;3913;51435;4015;3910;1292;10516;1290;338872;64094;2200;1305;1306;255631;1278	25
cellular component	MHC class II protein complex	GO:0042613	7	3.52	0.01	HLA-DRA;HLA-DPA1;HLA-DQA1;HLA-DOB;HLA-DQB2;CD74;HLA-DMB	3122;3113;3117;3112;3120;972;3109	ENSG00000204287;ENSG00000231389;ENSG00000196735;ENSG00000241106;ENSG00000232629;ENSG00000019582;ENSG00000242574	ENSG00000204287;ENSG00000231389;ENSG00000196735;ENSG00000241106;ENSG00000232629;ENSG00000019582;ENSG00000242574	7	ENSG00000204287;ENSG00000231389;ENSG00000196735;ENSG00000241106;ENSG00000232629;ENSG00000019582;ENSG00000242574	7	3122;3113;3117;3112;3120;972;3109	7	ENSG00000204287;ENSG00000231389;ENSG00000196735;ENSG00000241106;ENSG00000232629;ENSG00000019582;ENSG00000242574	7		0		0
cellular component	myosin complex	GO:0016459	14	2.35	0.0113	MYO5B;MYBPH;MYH7;BMF;MYLPF;FILIP1L;MYOM2;MYOM1;MYH7B;CGNL1;MYH2;MYBPC3;MYO5C;MYH11	4645;4608;4625;90427;29895;11259;9172;8736;57644;84952;4620;4607;55930;4629	ENSG00000167306;ENSG00000133055;ENSG00000092054;ENSG00000104081;ENSG00000180209;ENSG00000168386;ENSG00000036448;ENSG00000101605;ENSG00000078814;ENSG00000128849;ENSG00000125414;ENSG00000134571;ENSG00000128833;ENSG00000133392	ENSG00000167306;ENSG00000133055;ENSG00000092054;ENSG00000104081;ENSG00000180209;ENSG00000168386;ENSG00000036448;ENSG00000101605;ENSG00000078814;ENSG00000128849;ENSG00000125414;ENSG00000134571;ENSG00000128833;ENSG00000133392	14	ENSG00000167306;ENSG00000133055;ENSG00000128833	3	4645;4608;55930	3	ENSG00000167306;ENSG00000133055;ENSG00000092054;ENSG00000104081;ENSG00000180209;ENSG00000168386;ENSG00000036448;ENSG00000101605;ENSG00000078814;ENSG00000128849;ENSG00000125414;ENSG00000134571;ENSG00000128833;ENSG00000133392	14	ENSG00000092054;ENSG00000104081;ENSG00000180209;ENSG00000168386;ENSG00000036448;ENSG00000101605;ENSG00000078814;ENSG00000128849;ENSG00000125414;ENSG00000134571;ENSG00000133392	11	4625;90427;29895;11259;9172;8736;57644;84952;4620;4607;4629	11
cellular component	vacuolar part	GO:0044437	54	1.49	0.0125	HLA-DRA;CD1B;TMEM192;ABCB6;PLBD2;HSPG2;CTSF;VAMP8;ASAH1;SPPL2A;M6PR;TPP1;CD1E;MARCH8;HLA-DPA1;AKTIP;TLR3;CTSS;GPC3;MARCH1;ATP6V0A4;DRAM1;BGN;AP1S3;TSPAN1;DLD;LAMP3;MAP1LC3C;KERA;OCA2;SLC36A1;HLA-DQA1;HOOK3;HLA-DMB;SLC17A5;OMD;NPC1;CD74;RNF13;CD68;HPSE;ATP6V1F;WIPI1;PLA2G4F;HLA-DQB2;VCAN;OGN;LAPTM5;ATP6V1G3;ARRB1;ATP6V0D2;CLN3;CYBASC3;HLA-DOB	3122;910;201931;10058;196463;3339;8722;8673;427;84888;4074;1200;913;220972;3113;64400;7098;1520;2719;55016;50617;55332;633;130340;10103;1738;27074;440738;11081;4948;206358;3117;84376;3109;26503;4958;4864;972;11342;968;10855;9296;55062;255189;3120;1462;4969;7805;127124;408;245972;1201;220002;3112	ENSG00000204287;ENSG00000158485;ENSG00000170088;ENSG00000115657;ENSG00000151176;ENSG00000142798;ENSG00000174080;ENSG00000118640;ENSG00000104763;ENSG00000138600;ENSG00000003056;ENSG00000166340;ENSG00000158488;ENSG00000165406;ENSG00000231389;ENSG00000166971;ENSG00000164342;ENSG00000163131;ENSG00000147257;ENSG00000145416;ENSG00000105929;ENSG00000136048;ENSG00000182492;ENSG00000152056;ENSG00000117472…	ENSG00000204287;ENSG00000158485;ENSG00000170088;ENSG00000115657;ENSG00000151176;ENSG00000142798;ENSG00000174080;ENSG00000118640;ENSG00000104763;ENSG00000138600;ENSG00000003056;ENSG00000166340;ENSG00000158488;ENSG00000165406;ENSG00000231389;ENSG00000166971;ENSG00000164342;ENSG00000163131;ENSG00000147257;ENSG00000145416;ENSG00000105929;ENSG00000136048;ENSG00000182492;ENSG00000152056;ENSG00000117472…	54	ENSG00000204287;ENSG00000158485;ENSG00000170088;ENSG00000151176;ENSG00000118640;ENSG00000104763;ENSG00000138600;ENSG00000003056;ENSG00000166340;ENSG00000165406;ENSG00000231389;ENSG00000164342;ENSG00000163131;ENSG00000147257;ENSG00000145416;ENSG00000105929;ENSG00000136048;ENSG00000152056;ENSG00000117472;ENSG00000078081;ENSG00000197769;ENSG00000139330;ENSG00000104044;ENSG00000123643;ENSG00000196735…	41	3122;910;201931;196463;8673;427;84888;4074;1200;220972;3113;7098;1520;2719;55016;50617;55332;130340;10103;27074;440738;11081;4948;206358;3117;84376;3109;4864;972;968;10855;9296;255189;3120;7805;127124;408;245972;1201;220002;3112	41	ENSG00000204287;ENSG00000158485;ENSG00000170088;ENSG00000115657;ENSG00000151176;ENSG00000142798;ENSG00000174080;ENSG00000118640;ENSG00000104763;ENSG00000138600;ENSG00000003056;ENSG00000166340;ENSG00000158488;ENSG00000165406;ENSG00000231389;ENSG00000166971;ENSG00000164342;ENSG00000163131;ENSG00000147257;ENSG00000145416;ENSG00000105929;ENSG00000136048;ENSG00000182492;ENSG00000152056;ENSG00000117472…	54	ENSG00000115657;ENSG00000142798;ENSG00000174080;ENSG00000158488;ENSG00000166971;ENSG00000182492;ENSG00000091140;ENSG00000119899;ENSG00000127083;ENSG00000082996;ENSG00000070540;ENSG00000038427;ENSG00000106809	13	10058;3339;8722;913;64400;633;1738;26503;4958;11342;55062;1462;4969	13
cellular component	apical plasma membrane	GO:0016324	43	1.56	0.0152	P2RY4;ENPEP;MREG;ATP6V1A;PTH1R;PRKAA1;TRPM6;AQP1;LRP2;IL18;SYTL4;STXBP2;MIP;TF;PIP;EPCAM;AQP2;DAB2;SLC46A1;ATP6V0A4;CLDN4;MPDZ;AQP8;SLC23A1;KCNMA1;EZR;ABCB4;ADRB2;GP2;GPR64;STX3;RAB27A;ATP12A;MUC1;PROM1;KCNK1;DPP4;ATP6V0D2;DPEP1;MAL;SLC22A4;SLC26A4;MUC13	5030;2028;55686;523;5745;5562;140803;358;4036;3606;94121;6813;4284;7018;5304;4072;359;1601;113235;50617;1364;8777;343;9963;3778;7430;5244;154;2813;10149;6809;5873;479;4582;8842;3775;1803;245972;1800;4118;6583;5172;56667	ENSG00000186912;ENSG00000138792;ENSG00000118242;ENSG00000114573;ENSG00000160801;ENSG00000132356;ENSG00000119121;ENSG00000240583;ENSG00000081479;ENSG00000150782;ENSG00000102362;ENSG00000076944;ENSG00000135517;ENSG00000091513;ENSG00000159763;ENSG00000119888;ENSG00000167580;ENSG00000153071;ENSG00000076351;ENSG00000105929;ENSG00000189143;ENSG00000107186;ENSG00000103375;ENSG00000170482;ENSG00000156113…	ENSG00000186912;ENSG00000138792;ENSG00000118242;ENSG00000114573;ENSG00000160801;ENSG00000132356;ENSG00000119121;ENSG00000240583;ENSG00000081479;ENSG00000150782;ENSG00000102362;ENSG00000076944;ENSG00000135517;ENSG00000091513;ENSG00000159763;ENSG00000119888;ENSG00000167580;ENSG00000153071;ENSG00000076351;ENSG00000105929;ENSG00000189143;ENSG00000107186;ENSG00000103375;ENSG00000170482;ENSG00000156113…	43	ENSG00000186912;ENSG00000138792;ENSG00000118242;ENSG00000114573;ENSG00000132356;ENSG00000119121;ENSG00000081479;ENSG00000150782;ENSG00000076944;ENSG00000091513;ENSG00000159763;ENSG00000119888;ENSG00000167580;ENSG00000076351;ENSG00000105929;ENSG00000189143;ENSG00000103375;ENSG00000170482;ENSG00000092820;ENSG00000169252;ENSG00000169347;ENSG00000166900;ENSG00000069974;ENSG00000075673;ENSG00000185499…	32	5030;2028;55686;523;5562;140803;4036;3606;6813;7018;5304;4072;359;113235;50617;1364;343;9963;7430;154;2813;6809;5873;479;4582;8842;3775;245972;1800;4118;5172;56667	32	ENSG00000186912;ENSG00000138792;ENSG00000118242;ENSG00000114573;ENSG00000160801;ENSG00000132356;ENSG00000119121;ENSG00000240583;ENSG00000081479;ENSG00000150782;ENSG00000102362;ENSG00000076944;ENSG00000135517;ENSG00000091513;ENSG00000159763;ENSG00000119888;ENSG00000167580;ENSG00000153071;ENSG00000076351;ENSG00000105929;ENSG00000189143;ENSG00000107186;ENSG00000103375;ENSG00000170482;ENSG00000156113…	43	ENSG00000160801;ENSG00000240583;ENSG00000102362;ENSG00000135517;ENSG00000153071;ENSG00000107186;ENSG00000156113;ENSG00000005471;ENSG00000173698;ENSG00000197635;ENSG00000197208	11	5745;358;94121;4284;1601;8777;3778;5244;10149;1803;6583	11
cellular component	condensed chromosome kinetochore	GO:0000777	23	1.86	0.0163	PLK1;SPC25;NDC80;ERCC6L;CENPK;NUF2;BUB1B;KIF2C;CCNB1;DYNC1I1;SKA1;CENPN;CENPO;SPAG5;NSL1;DSN1;SGOL2;NEK2;KNTC1;CENPT;SGOL1;SEH1L;BOD1	5347;57405;10403;54821;64105;83540;701;11004;891;1780;220134;55839;79172;10615;25936;79980;151246;4751;9735;80152;151648;81929;91272	ENSG00000166851;ENSG00000152253;ENSG00000080986;ENSG00000186871;ENSG00000123219;ENSG00000143228;ENSG00000156970;ENSG00000142945;ENSG00000134057;ENSG00000158560;ENSG00000154839;ENSG00000166451;ENSG00000138092;ENSG00000076382;ENSG00000117697;ENSG00000149636;ENSG00000163535;ENSG00000117650;ENSG00000184445;ENSG00000102901;ENSG00000129810;ENSG00000085415;ENSG00000145919	ENSG00000166851;ENSG00000152253;ENSG00000080986;ENSG00000186871;ENSG00000123219;ENSG00000143228;ENSG00000156970;ENSG00000142945;ENSG00000134057;ENSG00000158560;ENSG00000154839;ENSG00000166451;ENSG00000138092;ENSG00000076382;ENSG00000117697;ENSG00000149636;ENSG00000163535;ENSG00000117650;ENSG00000184445;ENSG00000102901;ENSG00000129810;ENSG00000085415;ENSG00000145919	23	ENSG00000152253;ENSG00000080986;ENSG00000186871;ENSG00000123219;ENSG00000143228;ENSG00000156970;ENSG00000134057;ENSG00000154839;ENSG00000166451;ENSG00000138092;ENSG00000076382;ENSG00000117697;ENSG00000149636;ENSG00000163535;ENSG00000117650;ENSG00000184445;ENSG00000102901;ENSG00000129810	18	57405;10403;54821;64105;83540;701;891;220134;55839;79172;10615;25936;79980;151246;4751;9735;80152;151648	18	ENSG00000166851;ENSG00000152253;ENSG00000080986;ENSG00000186871;ENSG00000123219;ENSG00000143228;ENSG00000156970;ENSG00000142945;ENSG00000134057;ENSG00000158560;ENSG00000154839;ENSG00000166451;ENSG00000138092;ENSG00000076382;ENSG00000117697;ENSG00000149636;ENSG00000163535;ENSG00000117650;ENSG00000184445;ENSG00000102901;ENSG00000129810;ENSG00000085415;ENSG00000145919	23	ENSG00000166851;ENSG00000142945;ENSG00000158560;ENSG00000085415;ENSG00000145919	5	5347;11004;1780;81929;91272	5
cellular component	condensed chromosome, centromeric region	GO:0000779	24	1.81	0.0187	PLK1;SPC25;NDC80;ERCC6L;CENPK;NUF2;BUB1B;KIF2C;AURKB;CCNB1;DYNC1I1;SKA1;CENPN;CENPO;SPAG5;NSL1;DSN1;SGOL2;NEK2;KNTC1;CENPT;SGOL1;SEH1L;BOD1	5347;57405;10403;54821;64105;83540;701;11004;9212;891;1780;220134;55839;79172;10615;25936;79980;151246;4751;9735;80152;151648;81929;91272	ENSG00000166851;ENSG00000152253;ENSG00000080986;ENSG00000186871;ENSG00000123219;ENSG00000143228;ENSG00000156970;ENSG00000142945;ENSG00000178999;ENSG00000134057;ENSG00000158560;ENSG00000154839;ENSG00000166451;ENSG00000138092;ENSG00000076382;ENSG00000117697;ENSG00000149636;ENSG00000163535;ENSG00000117650;ENSG00000184445;ENSG00000102901;ENSG00000129810;ENSG00000085415;ENSG00000145919	ENSG00000166851;ENSG00000152253;ENSG00000080986;ENSG00000186871;ENSG00000123219;ENSG00000143228;ENSG00000156970;ENSG00000142945;ENSG00000178999;ENSG00000134057;ENSG00000158560;ENSG00000154839;ENSG00000166451;ENSG00000138092;ENSG00000076382;ENSG00000117697;ENSG00000149636;ENSG00000163535;ENSG00000117650;ENSG00000184445;ENSG00000102901;ENSG00000129810;ENSG00000085415;ENSG00000145919	24	ENSG00000152253;ENSG00000080986;ENSG00000186871;ENSG00000123219;ENSG00000143228;ENSG00000156970;ENSG00000178999;ENSG00000134057;ENSG00000154839;ENSG00000166451;ENSG00000138092;ENSG00000076382;ENSG00000117697;ENSG00000149636;ENSG00000163535;ENSG00000117650;ENSG00000184445;ENSG00000102901;ENSG00000129810	19	57405;10403;54821;64105;83540;701;9212;891;220134;55839;79172;10615;25936;79980;151246;4751;9735;80152;151648	19	ENSG00000166851;ENSG00000152253;ENSG00000080986;ENSG00000186871;ENSG00000123219;ENSG00000143228;ENSG00000156970;ENSG00000142945;ENSG00000178999;ENSG00000134057;ENSG00000158560;ENSG00000154839;ENSG00000166451;ENSG00000138092;ENSG00000076382;ENSG00000117697;ENSG00000149636;ENSG00000163535;ENSG00000117650;ENSG00000184445;ENSG00000102901;ENSG00000129810;ENSG00000085415;ENSG00000145919	24	ENSG00000166851;ENSG00000142945;ENSG00000158560;ENSG00000085415;ENSG00000145919	5	5347;11004;1780;81929;91272	5
cellular component	tight junction	GO:0005923	22	1.81	0.0273	DDX58;CLDN1;CLMP;CLDN5;AMICA1;BVES;PMP22;TJP1;MPP5;CLDN8;CGNL1;CXADR;EPCAM;TJP2;WNK4;MPP7;CLDN4;MPDZ;CLDN18;NPHP1;CLDN7;OCLN	23586;9076;79827;7122;120425;11149;5376;7082;64398;9073;84952;1525;4072;9414;65266;143098;1364;8777;51208;4867;1366;100506658	ENSG00000107201;ENSG00000163347;ENSG00000166250;ENSG00000184113;ENSG00000160593;ENSG00000112276;ENSG00000109099;ENSG00000104067;ENSG00000072415;ENSG00000156284;ENSG00000128849;ENSG00000154639;ENSG00000119888;ENSG00000119139;ENSG00000126562;ENSG00000150054;ENSG00000189143;ENSG00000107186;ENSG00000066405;ENSG00000144061;ENSG00000181885;ENSG00000197822	ENSG00000107201;ENSG00000163347;ENSG00000166250;ENSG00000184113;ENSG00000160593;ENSG00000112276;ENSG00000109099;ENSG00000104067;ENSG00000072415;ENSG00000156284;ENSG00000128849;ENSG00000154639;ENSG00000119888;ENSG00000119139;ENSG00000126562;ENSG00000150054;ENSG00000189143;ENSG00000107186;ENSG00000066405;ENSG00000144061;ENSG00000181885;ENSG00000197822	22	ENSG00000107201;ENSG00000163347;ENSG00000184113;ENSG00000160593;ENSG00000072415;ENSG00000156284;ENSG00000154639;ENSG00000119888;ENSG00000119139;ENSG00000189143;ENSG00000066405;ENSG00000181885;ENSG00000197822	13	23586;9076;7122;120425;64398;9073;1525;4072;9414;1364;51208;1366;100506658	13	ENSG00000107201;ENSG00000163347;ENSG00000166250;ENSG00000184113;ENSG00000160593;ENSG00000112276;ENSG00000109099;ENSG00000104067;ENSG00000072415;ENSG00000156284;ENSG00000128849;ENSG00000154639;ENSG00000119888;ENSG00000119139;ENSG00000126562;ENSG00000150054;ENSG00000189143;ENSG00000107186;ENSG00000066405;ENSG00000144061;ENSG00000181885;ENSG00000197822	22	ENSG00000166250;ENSG00000112276;ENSG00000109099;ENSG00000104067;ENSG00000128849;ENSG00000126562;ENSG00000150054;ENSG00000107186;ENSG00000144061	9	79827;11149;5376;7082;84952;65266;143098;8777;4867	9
cellular component	occluding junction	GO:0070160	22	1.81	0.0273	DDX58;CLDN1;CLMP;CLDN5;AMICA1;BVES;PMP22;TJP1;MPP5;CLDN8;CGNL1;CXADR;EPCAM;TJP2;WNK4;MPP7;CLDN4;MPDZ;CLDN18;NPHP1;CLDN7;OCLN	23586;9076;79827;7122;120425;11149;5376;7082;64398;9073;84952;1525;4072;9414;65266;143098;1364;8777;51208;4867;1366;100506658	ENSG00000107201;ENSG00000163347;ENSG00000166250;ENSG00000184113;ENSG00000160593;ENSG00000112276;ENSG00000109099;ENSG00000104067;ENSG00000072415;ENSG00000156284;ENSG00000128849;ENSG00000154639;ENSG00000119888;ENSG00000119139;ENSG00000126562;ENSG00000150054;ENSG00000189143;ENSG00000107186;ENSG00000066405;ENSG00000144061;ENSG00000181885;ENSG00000197822	ENSG00000107201;ENSG00000163347;ENSG00000166250;ENSG00000184113;ENSG00000160593;ENSG00000112276;ENSG00000109099;ENSG00000104067;ENSG00000072415;ENSG00000156284;ENSG00000128849;ENSG00000154639;ENSG00000119888;ENSG00000119139;ENSG00000126562;ENSG00000150054;ENSG00000189143;ENSG00000107186;ENSG00000066405;ENSG00000144061;ENSG00000181885;ENSG00000197822	22	ENSG00000107201;ENSG00000163347;ENSG00000184113;ENSG00000160593;ENSG00000072415;ENSG00000156284;ENSG00000154639;ENSG00000119888;ENSG00000119139;ENSG00000189143;ENSG00000066405;ENSG00000181885;ENSG00000197822	13	23586;9076;7122;120425;64398;9073;1525;4072;9414;1364;51208;1366;100506658	13	ENSG00000107201;ENSG00000163347;ENSG00000166250;ENSG00000184113;ENSG00000160593;ENSG00000112276;ENSG00000109099;ENSG00000104067;ENSG00000072415;ENSG00000156284;ENSG00000128849;ENSG00000154639;ENSG00000119888;ENSG00000119139;ENSG00000126562;ENSG00000150054;ENSG00000189143;ENSG00000107186;ENSG00000066405;ENSG00000144061;ENSG00000181885;ENSG00000197822	22	ENSG00000166250;ENSG00000112276;ENSG00000109099;ENSG00000104067;ENSG00000128849;ENSG00000126562;ENSG00000150054;ENSG00000107186;ENSG00000144061	9	79827;11149;5376;7082;84952;65266;143098;8777;4867	9
cellular component	lamellar body	GO:0042599	6	3.4	0.028	ABCA3;SPINK5;CTSH;SFTPB;SFTPC;LAMP3	21;11005;1512;6439;6440;27074	ENSG00000167972;ENSG00000133710;ENSG00000103811;ENSG00000168878;ENSG00000168484;ENSG00000078081	ENSG00000167972;ENSG00000133710;ENSG00000103811;ENSG00000168878;ENSG00000168484;ENSG00000078081	6	ENSG00000167972;ENSG00000103811;ENSG00000168878;ENSG00000168484;ENSG00000078081	5	21;1512;6439;6440;27074	5	ENSG00000167972;ENSG00000133710;ENSG00000103811;ENSG00000168878;ENSG00000168484;ENSG00000078081	6	ENSG00000133710	1	11005	1

## Sheet: KEGG
Class	Description	Accession	Gene count	Enrichment	P value	Gene names	Gene IDs	Source ID	Source ID	Total count	Up (Ensembl)	Gene count	Up (Entrez)	Gene count	Source ID	Total count	Down (Ensembl)	Gene count	Down (Entrez)	Gene count
KEGG pathway	Phagosome	4145	38	2	0.0004	HLA-DRA;OLR1;ATP6V1A;MSR1;TAP1;THBS3;DYNC1I1;ITGB5;HLA-A;M6PR;HLA-DPA1;CTSS;NCF1;ATP6V0A4;TUBAL3;DYNC2H1;CORO1A;TLR4;NOX1;SEC61A2;C3;SFTPA1;CLEC7A;HLA-DQA1;HLA-DMB;CD14;CD36;FCGR3A;MARCO;ITGB2;HLA-B;SEC61A1;ATP6V1F;TUBA8;ATP6V1G3;ATP6V0D2;ITGAV;HLA-DOB	3122;4973;523;4481;6890;7059;1780;3693;3105;4074;3113;1520;653361;50617;79861;79659;11151;7099;27035;55176;718;653509;64581;3117;3109;929;948;2214;8685;3689;3106;29927;9296;51807;127124;245972;3685;3112	ENSG00000204287;ENSG00000173391;ENSG00000114573;ENSG00000038945;ENSG00000168394;ENSG00000169231;ENSG00000158560;ENSG00000082781;ENSG00000206503;ENSG00000003056;ENSG00000231389;ENSG00000163131;ENSG00000158517;ENSG00000105929;ENSG00000178462;ENSG00000187240;ENSG00000102879;ENSG00000136869;ENSG00000007952;ENSG00000065665;ENSG00000125730;ENSG00000122852;ENSG00000172243;ENSG00000196735;ENSG00000242574…	ENSG00000204287;ENSG00000173391;ENSG00000114573;ENSG00000038945;ENSG00000168394;ENSG00000169231;ENSG00000158560;ENSG00000082781;ENSG00000206503;ENSG00000003056;ENSG00000231389;ENSG00000163131;ENSG00000158517;ENSG00000105929;ENSG00000178462;ENSG00000187240;ENSG00000102879;ENSG00000136869;ENSG00000007952;ENSG00000065665;ENSG00000125730;ENSG00000122852;ENSG00000172243;ENSG00000196735;ENSG00000242574…	38	ENSG00000204287;ENSG00000173391;ENSG00000114573;ENSG00000038945;ENSG00000168394;ENSG00000206503;ENSG00000003056;ENSG00000231389;ENSG00000163131;ENSG00000158517;ENSG00000105929;ENSG00000178462;ENSG00000102879;ENSG00000136869;ENSG00000007952;ENSG00000125730;ENSG00000122852;ENSG00000172243;ENSG00000196735;ENSG00000242574;ENSG00000170458;ENSG00000135218;ENSG00000203747;ENSG00000019169;ENSG00000160255…	31	3122;4973;523;4481;6890;3105;4074;3113;1520;653361;50617;79861;11151;7099;27035;718;653509;64581;3117;3109;929;948;2214;8685;3689;3106;29927;9296;127124;245972;3112	31	ENSG00000204287;ENSG00000173391;ENSG00000114573;ENSG00000038945;ENSG00000168394;ENSG00000169231;ENSG00000158560;ENSG00000082781;ENSG00000206503;ENSG00000003056;ENSG00000231389;ENSG00000163131;ENSG00000158517;ENSG00000105929;ENSG00000178462;ENSG00000187240;ENSG00000102879;ENSG00000136869;ENSG00000007952;ENSG00000065665;ENSG00000125730;ENSG00000122852;ENSG00000172243;ENSG00000196735;ENSG00000242574…	38	ENSG00000169231;ENSG00000158560;ENSG00000082781;ENSG00000187240;ENSG00000065665;ENSG00000183785;ENSG00000138448	7	7059;1780;3693;79659;55176;51807;3685	7
KEGG pathway	Rheumatoid arthritis	5323	27	2.35	0.0004	HLA-DRA;TNF;ITGAL;CTLA4;HLA-DQA1;IL15;ATP6V1A;LTB;TNFSF13B;HLA-DMB;MMP1;IL18;CSF2;VEGFA;IL1A;FOS;CXCL5;HLA-DPA1;ITGB2;ATP6V1F;IL8;TGFB3;ATP6V0A4;ATP6V1G3;ATP6V0D2;TLR4;HLA-DOB	3122;7124;3683;1493;3117;3600;523;4050;10673;3109;4312;3606;1437;7422;3552;2353;6374;3113;3689;9296;3576;7043;50617;127124;245972;7099;3112	ENSG00000204287;ENSG00000232810;ENSG00000005844;ENSG00000163599;ENSG00000196735;ENSG00000164136;ENSG00000114573;ENSG00000227507;ENSG00000102524;ENSG00000242574;ENSG00000196611;ENSG00000150782;ENSG00000164400;ENSG00000112715;ENSG00000115008;ENSG00000170345;ENSG00000163735;ENSG00000231389;ENSG00000160255;ENSG00000128524;ENSG00000169429;ENSG00000119699;ENSG00000105929;ENSG00000151418;ENSG00000147614…	ENSG00000204287;ENSG00000232810;ENSG00000005844;ENSG00000163599;ENSG00000196735;ENSG00000164136;ENSG00000114573;ENSG00000227507;ENSG00000102524;ENSG00000242574;ENSG00000196611;ENSG00000150782;ENSG00000164400;ENSG00000112715;ENSG00000115008;ENSG00000170345;ENSG00000163735;ENSG00000231389;ENSG00000160255;ENSG00000128524;ENSG00000169429;ENSG00000119699;ENSG00000105929;ENSG00000151418;ENSG00000147614…	27	ENSG00000204287;ENSG00000232810;ENSG00000005844;ENSG00000163599;ENSG00000196735;ENSG00000164136;ENSG00000114573;ENSG00000227507;ENSG00000102524;ENSG00000242574;ENSG00000196611;ENSG00000150782;ENSG00000164400;ENSG00000112715;ENSG00000115008;ENSG00000163735;ENSG00000231389;ENSG00000160255;ENSG00000128524;ENSG00000169429;ENSG00000105929;ENSG00000151418;ENSG00000147614;ENSG00000136869;ENSG00000241106	25	3122;7124;3683;1493;3117;3600;523;4050;10673;3109;4312;3606;1437;7422;3552;6374;3113;3689;9296;3576;50617;127124;245972;7099;3112	25	ENSG00000204287;ENSG00000232810;ENSG00000005844;ENSG00000163599;ENSG00000196735;ENSG00000164136;ENSG00000114573;ENSG00000227507;ENSG00000102524;ENSG00000242574;ENSG00000196611;ENSG00000150782;ENSG00000164400;ENSG00000112715;ENSG00000115008;ENSG00000170345;ENSG00000163735;ENSG00000231389;ENSG00000160255;ENSG00000128524;ENSG00000169429;ENSG00000119699;ENSG00000105929;ENSG00000151418;ENSG00000147614…	27	ENSG00000170345;ENSG00000119699	2	2353;7043	2
KEGG pathway	Staphylococcus aureus infection	5150	17	2.85	0.0004	HLA-DRA;C3;PTAFR;ITGAL;HLA-DQA1;SELP;CFI;FPR1;HLA-DMB;C5;FGG;FCGR3A;HLA-DPA1;ITGB2;C1S;C2;HLA-DOB	3122;718;5724;3683;3117;6403;3426;2357;3109;727;2266;2214;3113;3689;716;717;3112	ENSG00000204287;ENSG00000125730;ENSG00000169403;ENSG00000005844;ENSG00000196735;ENSG00000174175;ENSG00000205403;ENSG00000171051;ENSG00000242574;ENSG00000106804;ENSG00000171557;ENSG00000203747;ENSG00000231389;ENSG00000160255;ENSG00000182326;ENSG00000166278;ENSG00000241106	ENSG00000204287;ENSG00000125730;ENSG00000169403;ENSG00000005844;ENSG00000196735;ENSG00000174175;ENSG00000205403;ENSG00000171051;ENSG00000242574;ENSG00000106804;ENSG00000171557;ENSG00000203747;ENSG00000231389;ENSG00000160255;ENSG00000182326;ENSG00000166278;ENSG00000241106	17	ENSG00000204287;ENSG00000125730;ENSG00000169403;ENSG00000005844;ENSG00000196735;ENSG00000174175;ENSG00000205403;ENSG00000171051;ENSG00000242574;ENSG00000106804;ENSG00000171557;ENSG00000203747;ENSG00000231389;ENSG00000160255;ENSG00000182326;ENSG00000166278;ENSG00000241106	17	3122;718;5724;3683;3117;6403;3426;2357;3109;727;2266;2214;3113;3689;716;717;3112	17	ENSG00000204287;ENSG00000125730;ENSG00000169403;ENSG00000005844;ENSG00000196735;ENSG00000174175;ENSG00000205403;ENSG00000171051;ENSG00000242574;ENSG00000106804;ENSG00000171557;ENSG00000203747;ENSG00000231389;ENSG00000160255;ENSG00000182326;ENSG00000166278;ENSG00000241106	17		0		0
KEGG pathway	Viral myocarditis	5416	21	2.43	0.0007	HLA-DRA;MYH7;ITGAL;HLA-DQA1;CD40LG;CASP9;SGCD;HLA-DMB;MYH7B;HLA-A;CXADR;MYH11;HLA-DPA1;ITGB2;HLA-B;RAC2;SGCA;CASP8;PRF1;HLA-DOB;MYH2	3122;4625;3683;3117;959;842;6444;3109;57644;3105;1525;4629;3113;3689;3106;5880;6442;841;5551;3112;4620	ENSG00000204287;ENSG00000092054;ENSG00000005844;ENSG00000196735;ENSG00000102245;ENSG00000132906;ENSG00000170624;ENSG00000242574;ENSG00000078814;ENSG00000206503;ENSG00000154639;ENSG00000133392;ENSG00000231389;ENSG00000160255;ENSG00000234745;ENSG00000128340;ENSG00000108823;ENSG00000064012;ENSG00000180644;ENSG00000241106;ENSG00000125414	ENSG00000204287;ENSG00000092054;ENSG00000005844;ENSG00000196735;ENSG00000102245;ENSG00000132906;ENSG00000170624;ENSG00000242574;ENSG00000078814;ENSG00000206503;ENSG00000154639;ENSG00000133392;ENSG00000231389;ENSG00000160255;ENSG00000234745;ENSG00000128340;ENSG00000108823;ENSG00000064012;ENSG00000180644;ENSG00000241106;ENSG00000125414	21	ENSG00000204287;ENSG00000005844;ENSG00000196735;ENSG00000102245;ENSG00000132906;ENSG00000242574;ENSG00000206503;ENSG00000154639;ENSG00000231389;ENSG00000160255;ENSG00000234745;ENSG00000128340;ENSG00000064012;ENSG00000180644;ENSG00000241106	15	3122;3683;3117;959;842;3109;3105;1525;3113;3689;3106;5880;841;5551;3112	15	ENSG00000204287;ENSG00000092054;ENSG00000005844;ENSG00000196735;ENSG00000102245;ENSG00000132906;ENSG00000170624;ENSG00000242574;ENSG00000078814;ENSG00000206503;ENSG00000154639;ENSG00000133392;ENSG00000231389;ENSG00000160255;ENSG00000234745;ENSG00000128340;ENSG00000108823;ENSG00000064012;ENSG00000180644;ENSG00000241106;ENSG00000125414	21	ENSG00000092054;ENSG00000170624;ENSG00000078814;ENSG00000133392;ENSG00000108823;ENSG00000125414	6	4625;6444;57644;4629;6442;4620	6
KEGG pathway	Cell adhesion molecules (CAMs)	4514	33	1.99	0.0008	HLA-DRA;CLDN1;CLDN5;SELP;CD40LG;SELL;ICOS;CLDN8;HLA-A;CD2;HLA-DPA1;ITGB8;CLDN4;CLDN18;CLDN7;ITGAL;ITGB7;CTLA4;HLA-DQA1;ITGA4;SELE;HLA-DMB;ALCAM;PTPRC;ITGB2;HLA-B;VCAN;VCAM1;ITGAV;CDH2;HLA-DOB;OCLN;CNTN1	3122;9076;7122;6403;959;6402;29851;9073;3105;914;3113;3696;1364;51208;1366;3683;3695;1493;3117;3676;6401;3109;214;5788;3689;3106;1462;7412;3685;1000;3112;100506658;1272	ENSG00000204287;ENSG00000163347;ENSG00000184113;ENSG00000174175;ENSG00000102245;ENSG00000188404;ENSG00000163600;ENSG00000156284;ENSG00000206503;ENSG00000116824;ENSG00000231389;ENSG00000105855;ENSG00000189143;ENSG00000066405;ENSG00000181885;ENSG00000005844;ENSG00000139626;ENSG00000163599;ENSG00000196735;ENSG00000115232;ENSG00000007908;ENSG00000242574;ENSG00000170017;ENSG00000081237;ENSG00000160255…	ENSG00000204287;ENSG00000163347;ENSG00000184113;ENSG00000174175;ENSG00000102245;ENSG00000188404;ENSG00000163600;ENSG00000156284;ENSG00000206503;ENSG00000116824;ENSG00000231389;ENSG00000105855;ENSG00000189143;ENSG00000066405;ENSG00000181885;ENSG00000005844;ENSG00000139626;ENSG00000163599;ENSG00000196735;ENSG00000115232;ENSG00000007908;ENSG00000242574;ENSG00000170017;ENSG00000081237;ENSG00000160255…	33	ENSG00000204287;ENSG00000163347;ENSG00000184113;ENSG00000174175;ENSG00000102245;ENSG00000188404;ENSG00000163600;ENSG00000156284;ENSG00000206503;ENSG00000116824;ENSG00000231389;ENSG00000189143;ENSG00000066405;ENSG00000181885;ENSG00000005844;ENSG00000139626;ENSG00000163599;ENSG00000196735;ENSG00000115232;ENSG00000242574;ENSG00000170017;ENSG00000081237;ENSG00000160255;ENSG00000234745;ENSG00000162692…	27	3122;9076;7122;6403;959;6402;29851;9073;3105;914;3113;1364;51208;1366;3683;3695;1493;3117;3676;3109;214;5788;3689;3106;7412;3112;100506658	27	ENSG00000204287;ENSG00000163347;ENSG00000184113;ENSG00000174175;ENSG00000102245;ENSG00000188404;ENSG00000163600;ENSG00000156284;ENSG00000206503;ENSG00000116824;ENSG00000231389;ENSG00000105855;ENSG00000189143;ENSG00000066405;ENSG00000181885;ENSG00000005844;ENSG00000139626;ENSG00000163599;ENSG00000196735;ENSG00000115232;ENSG00000007908;ENSG00000242574;ENSG00000170017;ENSG00000081237;ENSG00000160255…	33	ENSG00000105855;ENSG00000007908;ENSG00000038427;ENSG00000138448;ENSG00000170558;ENSG00000018236	6	3696;6401;1462;3685;1000;1272	6
KEGG pathway	Natural killer cell mediated cytotoxicity	4650	29	2.05	0.0009	TNF;VAV3;HCST;ITGAL;CD48;SHC4;LCK;TNFSF10;KRAS;CSF2;LCP2;GZMB;FCGR3A;HLA-A;CD244;ITGB2;HLA-B;RAC2;PRKCG;SH2D1A;PRKCB;ZAP70;CD247;PLCG2;PTK2B;PPP3CC;PRF1;PIK3CG;ULBP1	7124;10451;10870;3683;962;399694;3932;8743;3845;1437;3937;3002;2214;3105;51744;3689;3106;5880;5582;4068;5579;7535;919;5336;2185;5533;5551;5294;80329	ENSG00000232810;ENSG00000134215;ENSG00000126264;ENSG00000005844;ENSG00000117091;ENSG00000185634;ENSG00000182866;ENSG00000121858;ENSG00000133703;ENSG00000164400;ENSG00000043462;ENSG00000100453;ENSG00000203747;ENSG00000206503;ENSG00000122223;ENSG00000160255;ENSG00000234745;ENSG00000128340;ENSG00000126583;ENSG00000183918;ENSG00000166501;ENSG00000115085;ENSG00000198821;ENSG00000197943;ENSG00000120899…	ENSG00000232810;ENSG00000134215;ENSG00000126264;ENSG00000005844;ENSG00000117091;ENSG00000185634;ENSG00000182866;ENSG00000121858;ENSG00000133703;ENSG00000164400;ENSG00000043462;ENSG00000100453;ENSG00000203747;ENSG00000206503;ENSG00000122223;ENSG00000160255;ENSG00000234745;ENSG00000128340;ENSG00000126583;ENSG00000183918;ENSG00000166501;ENSG00000115085;ENSG00000198821;ENSG00000197943;ENSG00000120899…	29	ENSG00000232810;ENSG00000134215;ENSG00000126264;ENSG00000005844;ENSG00000117091;ENSG00000182866;ENSG00000121858;ENSG00000133703;ENSG00000164400;ENSG00000043462;ENSG00000100453;ENSG00000203747;ENSG00000206503;ENSG00000122223;ENSG00000160255;ENSG00000234745;ENSG00000128340;ENSG00000183918;ENSG00000166501;ENSG00000115085;ENSG00000198821;ENSG00000197943;ENSG00000120899;ENSG00000180644;ENSG00000105851…	26	7124;10451;10870;3683;962;3932;8743;3845;1437;3937;3002;2214;3105;51744;3689;3106;5880;4068;5579;7535;919;5336;2185;5551;5294;80329	26	ENSG00000232810;ENSG00000134215;ENSG00000126264;ENSG00000005844;ENSG00000117091;ENSG00000185634;ENSG00000182866;ENSG00000121858;ENSG00000133703;ENSG00000164400;ENSG00000043462;ENSG00000100453;ENSG00000203747;ENSG00000206503;ENSG00000122223;ENSG00000160255;ENSG00000234745;ENSG00000128340;ENSG00000126583;ENSG00000183918;ENSG00000166501;ENSG00000115085;ENSG00000198821;ENSG00000197943;ENSG00000120899…	29	ENSG00000185634;ENSG00000126583;ENSG00000120910	3	399694;5582;5533	3
KEGG pathway	Leishmaniasis	5140	23	2.26	0.0009	HLA-DRA;TNF;C3;HLA-DQA1;ITGA4;HLA-DMB;IL1A;MAPK14;FOS;FCGR3A;HLA-DPA1;ITGB2;PTGS2;IL12A;PRKCB;CR1;NFKBIA;NCF1;TGFB3;STAT1;TLR4;NOS2;HLA-DOB	3122;7124;718;3117;3676;3109;3552;1432;2353;2214;3113;3689;5743;3592;5579;1378;4792;653361;7043;6772;7099;4843;3112	ENSG00000204287;ENSG00000232810;ENSG00000125730;ENSG00000196735;ENSG00000115232;ENSG00000242574;ENSG00000115008;ENSG00000112062;ENSG00000170345;ENSG00000203747;ENSG00000231389;ENSG00000160255;ENSG00000073756;ENSG00000168811;ENSG00000166501;ENSG00000203710;ENSG00000100906;ENSG00000158517;ENSG00000119699;ENSG00000115415;ENSG00000136869;ENSG00000007171;ENSG00000241106	ENSG00000204287;ENSG00000232810;ENSG00000125730;ENSG00000196735;ENSG00000115232;ENSG00000242574;ENSG00000115008;ENSG00000112062;ENSG00000170345;ENSG00000203747;ENSG00000231389;ENSG00000160255;ENSG00000073756;ENSG00000168811;ENSG00000166501;ENSG00000203710;ENSG00000100906;ENSG00000158517;ENSG00000119699;ENSG00000115415;ENSG00000136869;ENSG00000007171;ENSG00000241106	23	ENSG00000204287;ENSG00000232810;ENSG00000125730;ENSG00000196735;ENSG00000115232;ENSG00000242574;ENSG00000115008;ENSG00000112062;ENSG00000203747;ENSG00000231389;ENSG00000160255;ENSG00000168811;ENSG00000166501;ENSG00000203710;ENSG00000100906;ENSG00000158517;ENSG00000115415;ENSG00000136869;ENSG00000007171;ENSG00000241106	20	3122;7124;718;3117;3676;3109;3552;1432;2214;3113;3689;3592;5579;1378;4792;653361;6772;7099;4843;3112	20	ENSG00000204287;ENSG00000232810;ENSG00000125730;ENSG00000196735;ENSG00000115232;ENSG00000242574;ENSG00000115008;ENSG00000112062;ENSG00000170345;ENSG00000203747;ENSG00000231389;ENSG00000160255;ENSG00000073756;ENSG00000168811;ENSG00000166501;ENSG00000203710;ENSG00000100906;ENSG00000158517;ENSG00000119699;ENSG00000115415;ENSG00000136869;ENSG00000007171;ENSG00000241106	23	ENSG00000170345;ENSG00000073756;ENSG00000119699	3	2353;5743;7043	3
KEGG pathway	Type I diabetes mellitus	4940	14	2.75	0.0015	HLA-DRA;TNF;HLA-DPA1;HLA-B;IL12A;HLA-DQA1;IL2;HLA-DMB;IL1A;PRF1;CPE;GZMB;HLA-DOB;HLA-A	3122;7124;3113;3106;3592;3117;3558;3109;3552;5551;1363;3002;3112;3105	ENSG00000204287;ENSG00000232810;ENSG00000231389;ENSG00000234745;ENSG00000168811;ENSG00000196735;ENSG00000109471;ENSG00000242574;ENSG00000115008;ENSG00000180644;ENSG00000109472;ENSG00000100453;ENSG00000241106;ENSG00000206503	ENSG00000204287;ENSG00000232810;ENSG00000231389;ENSG00000234745;ENSG00000168811;ENSG00000196735;ENSG00000109471;ENSG00000242574;ENSG00000115008;ENSG00000180644;ENSG00000109472;ENSG00000100453;ENSG00000241106;ENSG00000206503	14	ENSG00000204287;ENSG00000232810;ENSG00000231389;ENSG00000234745;ENSG00000168811;ENSG00000196735;ENSG00000109471;ENSG00000242574;ENSG00000115008;ENSG00000180644;ENSG00000100453;ENSG00000241106;ENSG00000206503	13	3122;7124;3113;3106;3592;3117;3558;3109;3552;5551;3002;3112;3105	13	ENSG00000204287;ENSG00000232810;ENSG00000231389;ENSG00000234745;ENSG00000168811;ENSG00000196735;ENSG00000109471;ENSG00000242574;ENSG00000115008;ENSG00000180644;ENSG00000109472;ENSG00000100453;ENSG00000241106;ENSG00000206503	14	ENSG00000109472	1	1363	1
KEGG pathway	Graft-versus-host disease	5332	12	3.01	0.0015	HLA-DRA;TNF;HLA-DPA1;HLA-B;HLA-DQA1;IL2;HLA-DMB;IL1A;PRF1;GZMB;HLA-DOB;HLA-A	3122;7124;3113;3106;3117;3558;3109;3552;5551;3002;3112;3105	ENSG00000204287;ENSG00000232810;ENSG00000231389;ENSG00000234745;ENSG00000196735;ENSG00000109471;ENSG00000242574;ENSG00000115008;ENSG00000180644;ENSG00000100453;ENSG00000241106;ENSG00000206503	ENSG00000204287;ENSG00000232810;ENSG00000231389;ENSG00000234745;ENSG00000196735;ENSG00000109471;ENSG00000242574;ENSG00000115008;ENSG00000180644;ENSG00000100453;ENSG00000241106;ENSG00000206503	12	ENSG00000204287;ENSG00000232810;ENSG00000231389;ENSG00000234745;ENSG00000196735;ENSG00000109471;ENSG00000242574;ENSG00000115008;ENSG00000180644;ENSG00000100453;ENSG00000241106;ENSG00000206503	12	3122;7124;3113;3106;3117;3558;3109;3552;5551;3002;3112;3105	12	ENSG00000204287;ENSG00000232810;ENSG00000231389;ENSG00000234745;ENSG00000196735;ENSG00000109471;ENSG00000242574;ENSG00000115008;ENSG00000180644;ENSG00000100453;ENSG00000241106;ENSG00000206503	12		0		0
KEGG pathway	ECM-receptor interaction	4512	25	2.02	0.0017	LAMA4;ITGB7;COL6A2;COL5A2;HSPG2;COL4A4;ITGA4;TNXB;THBS3;CD36;ITGB5;COL3A1;TNC;LAMA3;ITGA3;ITGB8;COL6A1;COL5A1;CD47;LAMB2;ITGAV;COL1A2;CD44;ITGB6;IBSP	3910;3695;1292;1290;3339;1286;3676;7148;7059;948;3693;1281;3371;3909;3675;3696;1291;1289;961;3913;3685;1278;960;3694;3381	ENSG00000112769;ENSG00000139626;ENSG00000142173;ENSG00000204262;ENSG00000142798;ENSG00000081052;ENSG00000115232;ENSG00000168477;ENSG00000169231;ENSG00000135218;ENSG00000082781;ENSG00000168542;ENSG00000041982;ENSG00000053747;ENSG00000005884;ENSG00000105855;ENSG00000142156;ENSG00000130635;ENSG00000196776;ENSG00000172037;ENSG00000138448;ENSG00000164692;ENSG00000026508;ENSG00000115221;ENSG00000029559	ENSG00000112769;ENSG00000139626;ENSG00000142173;ENSG00000204262;ENSG00000142798;ENSG00000081052;ENSG00000115232;ENSG00000168477;ENSG00000169231;ENSG00000135218;ENSG00000082781;ENSG00000168542;ENSG00000041982;ENSG00000053747;ENSG00000005884;ENSG00000105855;ENSG00000142156;ENSG00000130635;ENSG00000196776;ENSG00000172037;ENSG00000138448;ENSG00000164692;ENSG00000026508;ENSG00000115221;ENSG00000029559	25	ENSG00000139626;ENSG00000081052;ENSG00000115232;ENSG00000135218;ENSG00000041982;ENSG00000053747;ENSG00000005884;ENSG00000196776;ENSG00000026508;ENSG00000115221;ENSG00000029559	11	3695;1286;3676;948;3371;3909;3675;961;960;3694;3381	11	ENSG00000112769;ENSG00000139626;ENSG00000142173;ENSG00000204262;ENSG00000142798;ENSG00000081052;ENSG00000115232;ENSG00000168477;ENSG00000169231;ENSG00000135218;ENSG00000082781;ENSG00000168542;ENSG00000041982;ENSG00000053747;ENSG00000005884;ENSG00000105855;ENSG00000142156;ENSG00000130635;ENSG00000196776;ENSG00000172037;ENSG00000138448;ENSG00000164692;ENSG00000026508;ENSG00000115221;ENSG00000029559	25	ENSG00000112769;ENSG00000142173;ENSG00000204262;ENSG00000142798;ENSG00000168477;ENSG00000169231;ENSG00000082781;ENSG00000168542;ENSG00000105855;ENSG00000142156;ENSG00000130635;ENSG00000172037;ENSG00000138448;ENSG00000164692	14	3910;1292;1290;3339;7148;7059;3693;1281;3696;1291;1289;3913;3685;1278	14
KEGG pathway	Leukocyte transendothelial migration	4670	29	1.96	0.0017	CLDN1;VAV3;CLDN5;ITGAL;ITGA4;ARHGAP5;EZR;ACTN2;MAPK14;CLDN8;GNAI1;TXK;ITGB2;RAC2;PRKCG;CXCR4;MYLPF;PRKCB;NCF1;PLCG2;PTK2B;CLDN4;VCAM1;ROCK1;CLDN18;PIK3CG;NOX1;CLDN7;OCLN	9076;10451;7122;3683;3676;394;7430;88;1432;9073;2770;7294;3689;5880;5582;7852;29895;5579;653361;5336;2185;1364;7412;6093;51208;5294;27035;1366;100506658	ENSG00000163347;ENSG00000134215;ENSG00000184113;ENSG00000005844;ENSG00000115232;ENSG00000100852;ENSG00000092820;ENSG00000077522;ENSG00000112062;ENSG00000156284;ENSG00000127955;ENSG00000074966;ENSG00000160255;ENSG00000128340;ENSG00000126583;ENSG00000121966;ENSG00000180209;ENSG00000166501;ENSG00000158517;ENSG00000197943;ENSG00000120899;ENSG00000189143;ENSG00000162692;ENSG00000067900;ENSG00000066405…	ENSG00000163347;ENSG00000134215;ENSG00000184113;ENSG00000005844;ENSG00000115232;ENSG00000100852;ENSG00000092820;ENSG00000077522;ENSG00000112062;ENSG00000156284;ENSG00000127955;ENSG00000074966;ENSG00000160255;ENSG00000128340;ENSG00000126583;ENSG00000121966;ENSG00000180209;ENSG00000166501;ENSG00000158517;ENSG00000197943;ENSG00000120899;ENSG00000189143;ENSG00000162692;ENSG00000067900;ENSG00000066405…	29	ENSG00000163347;ENSG00000134215;ENSG00000184113;ENSG00000005844;ENSG00000115232;ENSG00000092820;ENSG00000112062;ENSG00000156284;ENSG00000074966;ENSG00000160255;ENSG00000128340;ENSG00000121966;ENSG00000166501;ENSG00000158517;ENSG00000197943;ENSG00000120899;ENSG00000189143;ENSG00000162692;ENSG00000066405;ENSG00000105851;ENSG00000007952;ENSG00000181885;ENSG00000197822	23	9076;10451;7122;3683;3676;7430;1432;9073;7294;3689;5880;7852;5579;653361;5336;2185;1364;7412;51208;5294;27035;1366;100506658	23	ENSG00000163347;ENSG00000134215;ENSG00000184113;ENSG00000005844;ENSG00000115232;ENSG00000100852;ENSG00000092820;ENSG00000077522;ENSG00000112062;ENSG00000156284;ENSG00000127955;ENSG00000074966;ENSG00000160255;ENSG00000128340;ENSG00000126583;ENSG00000121966;ENSG00000180209;ENSG00000166501;ENSG00000158517;ENSG00000197943;ENSG00000120899;ENSG00000189143;ENSG00000162692;ENSG00000067900;ENSG00000066405…	29	ENSG00000100852;ENSG00000077522;ENSG00000127955;ENSG00000126583;ENSG00000180209;ENSG00000067900	6	394;88;2770;5582;29895;6093	6
KEGG pathway	Hypertrophic cardiomyopathy (HCM)	5410	27	2	0.0017	TNF;TNNC1;MYH7;ITGB7;ACTC1;TPM3;ACE;DES;ITGA4;PRKAA1;SGCD;RYR2;ITGB5;MYBPC3;SLC8A1;CACNB1;SGCA;PRKAG2;ITGA3;ITGB8;CACNB2;TGFB3;TNNT2;ITGAV;TPM1;ITGB6;CACNA2D1	7124;7134;4625;3695;70;7170;1636;1674;3676;5562;6444;6262;3693;4607;6546;782;6442;51422;3675;3696;783;7043;7139;3685;7168;3694;781	ENSG00000232810;ENSG00000114854;ENSG00000092054;ENSG00000139626;ENSG00000159251;ENSG00000143549;ENSG00000159640;ENSG00000175084;ENSG00000115232;ENSG00000132356;ENSG00000170624;ENSG00000198626;ENSG00000082781;ENSG00000134571;ENSG00000183023;ENSG00000067191;ENSG00000108823;ENSG00000106617;ENSG00000005884;ENSG00000105855;ENSG00000165995;ENSG00000119699;ENSG00000118194;ENSG00000138448;ENSG00000140416…	ENSG00000232810;ENSG00000114854;ENSG00000092054;ENSG00000139626;ENSG00000159251;ENSG00000143549;ENSG00000159640;ENSG00000175084;ENSG00000115232;ENSG00000132356;ENSG00000170624;ENSG00000198626;ENSG00000082781;ENSG00000134571;ENSG00000183023;ENSG00000067191;ENSG00000108823;ENSG00000106617;ENSG00000005884;ENSG00000105855;ENSG00000165995;ENSG00000119699;ENSG00000118194;ENSG00000138448;ENSG00000140416…	27	ENSG00000232810;ENSG00000139626;ENSG00000143549;ENSG00000159640;ENSG00000115232;ENSG00000132356;ENSG00000005884;ENSG00000115221	8	7124;3695;7170;1636;3676;5562;3675;3694	8	ENSG00000232810;ENSG00000114854;ENSG00000092054;ENSG00000139626;ENSG00000159251;ENSG00000143549;ENSG00000159640;ENSG00000175084;ENSG00000115232;ENSG00000132356;ENSG00000170624;ENSG00000198626;ENSG00000082781;ENSG00000134571;ENSG00000183023;ENSG00000067191;ENSG00000108823;ENSG00000106617;ENSG00000005884;ENSG00000105855;ENSG00000165995;ENSG00000119699;ENSG00000118194;ENSG00000138448;ENSG00000140416…	27	ENSG00000114854;ENSG00000092054;ENSG00000159251;ENSG00000175084;ENSG00000170624;ENSG00000198626;ENSG00000082781;ENSG00000134571;ENSG00000183023;ENSG00000067191;ENSG00000108823;ENSG00000106617;ENSG00000105855;ENSG00000165995;ENSG00000119699;ENSG00000118194;ENSG00000138448;ENSG00000140416;ENSG00000153956	19	7134;4625;70;1674;6444;6262;3693;4607;6546;782;6442;51422;3696;783;7043;7139;3685;7168;781	19
KEGG pathway	Dilated cardiomyopathy	5414	27	1.94	0.0027	TNF;TNNC1;MYH7;ITGB7;ACTC1;TPM3;DES;ITGA4;SGCD;RYR2;ITGB5;MYBPC3;SLC8A1;CACNB1;SGCA;PLN;ITGA3;ITGB8;ADCY5;CACNB2;TGFB3;ADCY3;TNNT2;ITGAV;TPM1;ITGB6;CACNA2D1	7124;7134;4625;3695;70;7170;1674;3676;6444;6262;3693;4607;6546;782;6442;5350;3675;3696;111;783;7043;109;7139;3685;7168;3694;781	ENSG00000232810;ENSG00000114854;ENSG00000092054;ENSG00000139626;ENSG00000159251;ENSG00000143549;ENSG00000175084;ENSG00000115232;ENSG00000170624;ENSG00000198626;ENSG00000082781;ENSG00000134571;ENSG00000183023;ENSG00000067191;ENSG00000108823;ENSG00000198523;ENSG00000005884;ENSG00000105855;ENSG00000173175;ENSG00000165995;ENSG00000119699;ENSG00000138031;ENSG00000118194;ENSG00000138448;ENSG00000140416…	ENSG00000232810;ENSG00000114854;ENSG00000092054;ENSG00000139626;ENSG00000159251;ENSG00000143549;ENSG00000175084;ENSG00000115232;ENSG00000170624;ENSG00000198626;ENSG00000082781;ENSG00000134571;ENSG00000183023;ENSG00000067191;ENSG00000108823;ENSG00000198523;ENSG00000005884;ENSG00000105855;ENSG00000173175;ENSG00000165995;ENSG00000119699;ENSG00000138031;ENSG00000118194;ENSG00000138448;ENSG00000140416…	27	ENSG00000232810;ENSG00000139626;ENSG00000143549;ENSG00000115232;ENSG00000005884;ENSG00000115221	6	7124;3695;7170;3676;3675;3694	6	ENSG00000232810;ENSG00000114854;ENSG00000092054;ENSG00000139626;ENSG00000159251;ENSG00000143549;ENSG00000175084;ENSG00000115232;ENSG00000170624;ENSG00000198626;ENSG00000082781;ENSG00000134571;ENSG00000183023;ENSG00000067191;ENSG00000108823;ENSG00000198523;ENSG00000005884;ENSG00000105855;ENSG00000173175;ENSG00000165995;ENSG00000119699;ENSG00000138031;ENSG00000118194;ENSG00000138448;ENSG00000140416…	27	ENSG00000114854;ENSG00000092054;ENSG00000159251;ENSG00000175084;ENSG00000170624;ENSG00000198626;ENSG00000082781;ENSG00000134571;ENSG00000183023;ENSG00000067191;ENSG00000108823;ENSG00000198523;ENSG00000105855;ENSG00000173175;ENSG00000165995;ENSG00000119699;ENSG00000138031;ENSG00000118194;ENSG00000138448;ENSG00000140416;ENSG00000153956	21	7134;4625;70;1674;6444;6262;3693;4607;6546;782;6442;5350;3696;111;783;7043;109;7139;3685;7168;781	21
KEGG pathway	Allograft rejection	5330	13	2.67	0.0027	HLA-DRA;TNF;HLA-DPA1;HLA-B;IL12A;HLA-DQA1;CD40LG;IL2;HLA-DMB;PRF1;GZMB;HLA-DOB;HLA-A	3122;7124;3113;3106;3592;3117;959;3558;3109;5551;3002;3112;3105	ENSG00000204287;ENSG00000232810;ENSG00000231389;ENSG00000234745;ENSG00000168811;ENSG00000196735;ENSG00000102245;ENSG00000109471;ENSG00000242574;ENSG00000180644;ENSG00000100453;ENSG00000241106;ENSG00000206503	ENSG00000204287;ENSG00000232810;ENSG00000231389;ENSG00000234745;ENSG00000168811;ENSG00000196735;ENSG00000102245;ENSG00000109471;ENSG00000242574;ENSG00000180644;ENSG00000100453;ENSG00000241106;ENSG00000206503	13	ENSG00000204287;ENSG00000232810;ENSG00000231389;ENSG00000234745;ENSG00000168811;ENSG00000196735;ENSG00000102245;ENSG00000109471;ENSG00000242574;ENSG00000180644;ENSG00000100453;ENSG00000241106;ENSG00000206503	13	3122;7124;3113;3106;3592;3117;959;3558;3109;5551;3002;3112;3105	13	ENSG00000204287;ENSG00000232810;ENSG00000231389;ENSG00000234745;ENSG00000168811;ENSG00000196735;ENSG00000102245;ENSG00000109471;ENSG00000242574;ENSG00000180644;ENSG00000100453;ENSG00000241106;ENSG00000206503	13		0		0
KEGG pathway	Malaria	5144	16	2.41	0.0027	TNF;ITGB2;IL12A;ITGAL;SELP;CD40LG;CR1;SELE;IL8;TGFB3;VCAM1;IL18;THBS3;MET;CD36;TLR4	7124;3689;3592;3683;6403;959;1378;6401;3576;7043;7412;3606;7059;4233;948;7099	ENSG00000232810;ENSG00000160255;ENSG00000168811;ENSG00000005844;ENSG00000174175;ENSG00000102245;ENSG00000203710;ENSG00000007908;ENSG00000169429;ENSG00000119699;ENSG00000162692;ENSG00000150782;ENSG00000169231;ENSG00000105976;ENSG00000135218;ENSG00000136869	ENSG00000232810;ENSG00000160255;ENSG00000168811;ENSG00000005844;ENSG00000174175;ENSG00000102245;ENSG00000203710;ENSG00000007908;ENSG00000169429;ENSG00000119699;ENSG00000162692;ENSG00000150782;ENSG00000169231;ENSG00000105976;ENSG00000135218;ENSG00000136869	16	ENSG00000232810;ENSG00000160255;ENSG00000168811;ENSG00000005844;ENSG00000174175;ENSG00000102245;ENSG00000203710;ENSG00000169429;ENSG00000162692;ENSG00000150782;ENSG00000105976;ENSG00000135218;ENSG00000136869	13	7124;3689;3592;3683;6403;959;1378;3576;7412;3606;4233;948;7099	13	ENSG00000232810;ENSG00000160255;ENSG00000168811;ENSG00000005844;ENSG00000174175;ENSG00000102245;ENSG00000203710;ENSG00000007908;ENSG00000169429;ENSG00000119699;ENSG00000162692;ENSG00000150782;ENSG00000169231;ENSG00000105976;ENSG00000135218;ENSG00000136869	16	ENSG00000007908;ENSG00000119699;ENSG00000169231	3	6401;7043;7059	3
KEGG pathway	Cytokine-cytokine receptor interaction	4060	44	1.63	0.0035	CCL19;CX3CR1;IL15;CXCR7;CD40LG;TNFRSF21;XCL1;LTB;TNFSF13B;IFNW1;IL18;CD27;TNFSF8;CXCR6;IL1A;FLT3;IL18R1;IL12A;BMP7;GHR;TGFB3;ACVR2A;IL17RA;MET;IL23R;INHBA;XCR1;VEGFC;TNF;CXCL13;IL11RA;IL2;CCR2;TNFSF10;IL22;VEGFA;CSF2;LEPR;CXCL5;CXCL10;CXCR4;IL8;TNFSF15;TNFRSF17	6363;1524;3600;57007;959;27242;6375;4050;10673;3467;3606;939;944;10663;3552;2322;8809;3592;655;2690;7043;92;23765;4233;149233;3624;2829;7424;7124;10563;3590;3558;729230;8743;50616;7422;1437;3953;6374;3627;7852;3576;9966;608	ENSG00000172724;ENSG00000168329;ENSG00000164136;ENSG00000144476;ENSG00000102245;ENSG00000146072;ENSG00000143184;ENSG00000227507;ENSG00000102524;ENSG00000177047;ENSG00000150782;ENSG00000139193;ENSG00000106952;ENSG00000172215;ENSG00000115008;ENSG00000122025;ENSG00000115604;ENSG00000168811;ENSG00000101144;ENSG00000112964;ENSG00000119699;ENSG00000121989;ENSG00000177663;ENSG00000105976;ENSG00000162594…	ENSG00000172724;ENSG00000168329;ENSG00000164136;ENSG00000144476;ENSG00000102245;ENSG00000146072;ENSG00000143184;ENSG00000227507;ENSG00000102524;ENSG00000177047;ENSG00000150782;ENSG00000139193;ENSG00000106952;ENSG00000172215;ENSG00000115008;ENSG00000122025;ENSG00000115604;ENSG00000168811;ENSG00000101144;ENSG00000112964;ENSG00000119699;ENSG00000121989;ENSG00000177663;ENSG00000105976;ENSG00000162594…	44	ENSG00000172724;ENSG00000168329;ENSG00000164136;ENSG00000102245;ENSG00000146072;ENSG00000143184;ENSG00000227507;ENSG00000102524;ENSG00000177047;ENSG00000150782;ENSG00000139193;ENSG00000106952;ENSG00000172215;ENSG00000115008;ENSG00000122025;ENSG00000115604;ENSG00000168811;ENSG00000101144;ENSG00000177663;ENSG00000105976;ENSG00000162594;ENSG00000173578;ENSG00000232810;ENSG00000156234;ENSG00000109471…	36	6363;1524;3600;959;27242;6375;4050;10673;3467;3606;939;944;10663;3552;2322;8809;3592;655;23765;4233;149233;2829;7124;10563;3558;729230;8743;50616;7422;1437;3953;6374;3627;7852;3576;608	36	ENSG00000172724;ENSG00000168329;ENSG00000164136;ENSG00000144476;ENSG00000102245;ENSG00000146072;ENSG00000143184;ENSG00000227507;ENSG00000102524;ENSG00000177047;ENSG00000150782;ENSG00000139193;ENSG00000106952;ENSG00000172215;ENSG00000115008;ENSG00000122025;ENSG00000115604;ENSG00000168811;ENSG00000101144;ENSG00000112964;ENSG00000119699;ENSG00000121989;ENSG00000177663;ENSG00000105976;ENSG00000162594…	44	ENSG00000144476;ENSG00000112964;ENSG00000119699;ENSG00000121989;ENSG00000122641;ENSG00000150630;ENSG00000137070;ENSG00000181634	8	57007;2690;7043;92;3624;7424;3590;9966	8
KEGG pathway	Hematopoietic cell lineage	4640	23	2	0.0035	HLA-DRA;CD1B;TNF;IL11RA;CD3E;ITGA4;CD3G;CD14;CD38;CSF2;IL1A;FLT3;CD36;CD1A;CD2;MS4A1;CD5;CD1E;ITGA3;CR1;CD3D;CD44;MME	3122;910;7124;3590;916;3676;917;929;952;1437;3552;2322;948;909;914;931;921;913;3675;1378;915;960;4311	ENSG00000204287;ENSG00000158485;ENSG00000232810;ENSG00000137070;ENSG00000198851;ENSG00000115232;ENSG00000160654;ENSG00000170458;ENSG00000004468;ENSG00000164400;ENSG00000115008;ENSG00000122025;ENSG00000135218;ENSG00000158477;ENSG00000116824;ENSG00000156738;ENSG00000110448;ENSG00000158488;ENSG00000005884;ENSG00000203710;ENSG00000167286;ENSG00000026508;ENSG00000196549	ENSG00000204287;ENSG00000158485;ENSG00000232810;ENSG00000137070;ENSG00000198851;ENSG00000115232;ENSG00000160654;ENSG00000170458;ENSG00000004468;ENSG00000164400;ENSG00000115008;ENSG00000122025;ENSG00000135218;ENSG00000158477;ENSG00000116824;ENSG00000156738;ENSG00000110448;ENSG00000158488;ENSG00000005884;ENSG00000203710;ENSG00000167286;ENSG00000026508;ENSG00000196549	23	ENSG00000204287;ENSG00000158485;ENSG00000232810;ENSG00000198851;ENSG00000115232;ENSG00000160654;ENSG00000170458;ENSG00000004468;ENSG00000164400;ENSG00000115008;ENSG00000122025;ENSG00000135218;ENSG00000158477;ENSG00000116824;ENSG00000156738;ENSG00000110448;ENSG00000005884;ENSG00000203710;ENSG00000167286;ENSG00000026508;ENSG00000196549	21	3122;910;7124;916;3676;917;929;952;1437;3552;2322;948;909;914;931;921;3675;1378;915;960;4311	21	ENSG00000204287;ENSG00000158485;ENSG00000232810;ENSG00000137070;ENSG00000198851;ENSG00000115232;ENSG00000160654;ENSG00000170458;ENSG00000004468;ENSG00000164400;ENSG00000115008;ENSG00000122025;ENSG00000135218;ENSG00000158477;ENSG00000116824;ENSG00000156738;ENSG00000110448;ENSG00000158488;ENSG00000005884;ENSG00000203710;ENSG00000167286;ENSG00000026508;ENSG00000196549	23	ENSG00000137070;ENSG00000158488	2	3590;913	2
KEGG pathway	Intestinal immune network for IgA production	4672	15	2.34	0.0045	HLA-DRA;HLA-DPA1;ITGB7;CXCR4;HLA-DQA1;IL15;CD40LG;ITGA4;IL2;TNFSF13B;HLA-DMB;PIGR;TNFRSF17;ICOS;HLA-DOB	3122;3113;3695;7852;3117;3600;959;3676;3558;10673;3109;5284;608;29851;3112	ENSG00000204287;ENSG00000231389;ENSG00000139626;ENSG00000121966;ENSG00000196735;ENSG00000164136;ENSG00000102245;ENSG00000115232;ENSG00000109471;ENSG00000102524;ENSG00000242574;ENSG00000162896;ENSG00000048462;ENSG00000163600;ENSG00000241106	ENSG00000204287;ENSG00000231389;ENSG00000139626;ENSG00000121966;ENSG00000196735;ENSG00000164136;ENSG00000102245;ENSG00000115232;ENSG00000109471;ENSG00000102524;ENSG00000242574;ENSG00000162896;ENSG00000048462;ENSG00000163600;ENSG00000241106	15	ENSG00000204287;ENSG00000231389;ENSG00000139626;ENSG00000121966;ENSG00000196735;ENSG00000164136;ENSG00000102245;ENSG00000115232;ENSG00000109471;ENSG00000102524;ENSG00000242574;ENSG00000162896;ENSG00000048462;ENSG00000163600;ENSG00000241106	15	3122;3113;3695;7852;3117;3600;959;3676;3558;10673;3109;5284;608;29851;3112	15	ENSG00000204287;ENSG00000231389;ENSG00000139626;ENSG00000121966;ENSG00000196735;ENSG00000164136;ENSG00000102245;ENSG00000115232;ENSG00000109471;ENSG00000102524;ENSG00000242574;ENSG00000162896;ENSG00000048462;ENSG00000163600;ENSG00000241106	15		0		0
KEGG pathway	Autoimmune thyroid disease	5320	13	2.45	0.0063	HLA-DRA;HLA-DPA1;HLA-B;CTLA4;HLA-DQA1;CGA;CD40LG;IL2;HLA-DMB;PRF1;GZMB;HLA-DOB;HLA-A	3122;3113;3106;1493;3117;1081;959;3558;3109;5551;3002;3112;3105	ENSG00000204287;ENSG00000231389;ENSG00000234745;ENSG00000163599;ENSG00000196735;ENSG00000135346;ENSG00000102245;ENSG00000109471;ENSG00000242574;ENSG00000180644;ENSG00000100453;ENSG00000241106;ENSG00000206503	ENSG00000204287;ENSG00000231389;ENSG00000234745;ENSG00000163599;ENSG00000196735;ENSG00000135346;ENSG00000102245;ENSG00000109471;ENSG00000242574;ENSG00000180644;ENSG00000100453;ENSG00000241106;ENSG00000206503	13	ENSG00000204287;ENSG00000231389;ENSG00000234745;ENSG00000163599;ENSG00000196735;ENSG00000135346;ENSG00000102245;ENSG00000109471;ENSG00000242574;ENSG00000180644;ENSG00000100453;ENSG00000241106;ENSG00000206503	13	3122;3113;3106;1493;3117;1081;959;3558;3109;5551;3002;3112;3105	13	ENSG00000204287;ENSG00000231389;ENSG00000234745;ENSG00000163599;ENSG00000196735;ENSG00000135346;ENSG00000102245;ENSG00000109471;ENSG00000242574;ENSG00000180644;ENSG00000100453;ENSG00000241106;ENSG00000206503	13		0		0
KEGG pathway	Systemic lupus erythematosus	5322	17	2.13	0.007	HLA-DRA;TNF;C3;H2AFZ;HLA-DQA1;CD40LG;C6;HLA-DMB;C5;ACTN2;FCGR3A;HLA-DPA1;HIST1H2AC;C1S;C2;HLA-DOB;C9	3122;7124;718;3015;3117;959;729;3109;727;88;2214;3113;8334;716;717;3112;735	ENSG00000204287;ENSG00000232810;ENSG00000125730;ENSG00000164032;ENSG00000196735;ENSG00000102245;ENSG00000039537;ENSG00000242574;ENSG00000106804;ENSG00000077522;ENSG00000203747;ENSG00000231389;ENSG00000180573;ENSG00000182326;ENSG00000166278;ENSG00000241106;ENSG00000113600	ENSG00000204287;ENSG00000232810;ENSG00000125730;ENSG00000164032;ENSG00000196735;ENSG00000102245;ENSG00000039537;ENSG00000242574;ENSG00000106804;ENSG00000077522;ENSG00000203747;ENSG00000231389;ENSG00000180573;ENSG00000182326;ENSG00000166278;ENSG00000241106;ENSG00000113600	17	ENSG00000204287;ENSG00000232810;ENSG00000125730;ENSG00000164032;ENSG00000196735;ENSG00000102245;ENSG00000039537;ENSG00000242574;ENSG00000106804;ENSG00000203747;ENSG00000231389;ENSG00000180573;ENSG00000182326;ENSG00000166278;ENSG00000241106;ENSG00000113600	16	3122;7124;718;3015;3117;959;729;3109;727;2214;3113;8334;716;717;3112;735	16	ENSG00000204287;ENSG00000232810;ENSG00000125730;ENSG00000164032;ENSG00000196735;ENSG00000102245;ENSG00000039537;ENSG00000242574;ENSG00000106804;ENSG00000077522;ENSG00000203747;ENSG00000231389;ENSG00000180573;ENSG00000182326;ENSG00000166278;ENSG00000241106;ENSG00000113600	17	ENSG00000077522	1	88	1
KEGG pathway	Primary immunodeficiency	5340	12	2.36	0.0144	PTPRC;LCK;CD40LG;ZAP70;CD3E;BTK;UNG;TAP1;CD3D;ICOS;IGLL1;BLNK	5788;3932;959;7535;916;695;7374;6890;915;29851;3543;29760	ENSG00000081237;ENSG00000182866;ENSG00000102245;ENSG00000115085;ENSG00000198851;ENSG00000010671;ENSG00000076248;ENSG00000168394;ENSG00000167286;ENSG00000163600;ENSG00000128322;ENSG00000095585	ENSG00000081237;ENSG00000182866;ENSG00000102245;ENSG00000115085;ENSG00000198851;ENSG00000010671;ENSG00000076248;ENSG00000168394;ENSG00000167286;ENSG00000163600;ENSG00000128322;ENSG00000095585	12	ENSG00000081237;ENSG00000182866;ENSG00000102245;ENSG00000115085;ENSG00000198851;ENSG00000010671;ENSG00000168394;ENSG00000167286;ENSG00000163600;ENSG00000128322;ENSG00000095585	11	5788;3932;959;7535;916;695;6890;915;29851;3543;29760	11	ENSG00000081237;ENSG00000182866;ENSG00000102245;ENSG00000115085;ENSG00000198851;ENSG00000010671;ENSG00000076248;ENSG00000168394;ENSG00000167286;ENSG00000163600;ENSG00000128322;ENSG00000095585	12	ENSG00000076248	1	7374	1
KEGG pathway	Glutathione metabolism	480	13	2.26	0.0146	GSTM2;GGCT;LAP3;GCLC;RRM2;GSTA4;TXNDC12;GPX7;GPX1;MGST1;GSS;GSTA1;PGD	2946;79017;51056;2729;6241;2941;51060;2882;2876;4257;2937;2938;5226	ENSG00000213366;ENSG00000006625;ENSG00000002549;ENSG00000001084;ENSG00000171848;ENSG00000170899;ENSG00000117862;ENSG00000116157;ENSG00000233276;ENSG00000008394;ENSG00000100983;ENSG00000243955;ENSG00000142657	ENSG00000213366;ENSG00000006625;ENSG00000002549;ENSG00000001084;ENSG00000171848;ENSG00000170899;ENSG00000117862;ENSG00000116157;ENSG00000233276;ENSG00000008394;ENSG00000100983;ENSG00000243955;ENSG00000142657	13	ENSG00000006625;ENSG00000002549;ENSG00000001084;ENSG00000171848;ENSG00000117862;ENSG00000233276;ENSG00000008394;ENSG00000100983;ENSG00000243955;ENSG00000142657	10	79017;51056;2729;6241;51060;2876;4257;2937;2938;5226	10	ENSG00000213366;ENSG00000006625;ENSG00000002549;ENSG00000001084;ENSG00000171848;ENSG00000170899;ENSG00000117862;ENSG00000116157;ENSG00000233276;ENSG00000008394;ENSG00000100983;ENSG00000243955;ENSG00000142657	13	ENSG00000213366;ENSG00000170899;ENSG00000116157	3	2946;2941;2882	3
KEGG pathway	Vibrio cholerae infection	5110	15	2.05	0.021	TJP2;PRKCG;SEC61A1;PRKCB;ATP6V1F;ATP6V1A;PLCG2;ATP6V1G3;ATP6V0A4;KDELR3;ADCY3;TJP1;ATP6V0D2;KDELR2;SEC61A2	9414;5582;29927;5579;9296;523;5336;127124;50617;11015;109;7082;245972;11014;55176	ENSG00000119139;ENSG00000126583;ENSG00000058262;ENSG00000166501;ENSG00000128524;ENSG00000114573;ENSG00000197943;ENSG00000151418;ENSG00000105929;ENSG00000100196;ENSG00000138031;ENSG00000104067;ENSG00000147614;ENSG00000136240;ENSG00000065665	ENSG00000119139;ENSG00000126583;ENSG00000058262;ENSG00000166501;ENSG00000128524;ENSG00000114573;ENSG00000197943;ENSG00000151418;ENSG00000105929;ENSG00000100196;ENSG00000138031;ENSG00000104067;ENSG00000147614;ENSG00000136240;ENSG00000065665	15	ENSG00000119139;ENSG00000058262;ENSG00000166501;ENSG00000128524;ENSG00000114573;ENSG00000197943;ENSG00000151418;ENSG00000105929;ENSG00000147614;ENSG00000136240	10	9414;29927;5579;9296;523;5336;127124;50617;245972;11014	10	ENSG00000119139;ENSG00000126583;ENSG00000058262;ENSG00000166501;ENSG00000128524;ENSG00000114573;ENSG00000197943;ENSG00000151418;ENSG00000105929;ENSG00000100196;ENSG00000138031;ENSG00000104067;ENSG00000147614;ENSG00000136240;ENSG00000065665	15	ENSG00000126583;ENSG00000100196;ENSG00000138031;ENSG00000104067;ENSG00000065665	5	5582;11015;109;7082;55176	5
KEGG pathway	Antigen processing and presentation	4612	15	1.94	0.0386	HLA-DRA;TNF;HLA-DPA1;HLA-B;CTSS;HLA-DQA1;PSME2;HSPA5;TAP1;HLA-DMB;B2M;HSPA2;HLA-DOB;CD74;HLA-A	3122;7124;3113;3106;1520;3117;5721;3309;6890;3109;567;3306;3112;972;3105	ENSG00000204287;ENSG00000232810;ENSG00000231389;ENSG00000234745;ENSG00000163131;ENSG00000196735;ENSG00000100911;ENSG00000044574;ENSG00000168394;ENSG00000242574;ENSG00000166710;ENSG00000126803;ENSG00000241106;ENSG00000019582;ENSG00000206503	ENSG00000204287;ENSG00000232810;ENSG00000231389;ENSG00000234745;ENSG00000163131;ENSG00000196735;ENSG00000100911;ENSG00000044574;ENSG00000168394;ENSG00000242574;ENSG00000166710;ENSG00000126803;ENSG00000241106;ENSG00000019582;ENSG00000206503	15	ENSG00000204287;ENSG00000232810;ENSG00000231389;ENSG00000234745;ENSG00000163131;ENSG00000196735;ENSG00000100911;ENSG00000044574;ENSG00000168394;ENSG00000242574;ENSG00000166710;ENSG00000241106;ENSG00000019582;ENSG00000206503	14	3122;7124;3113;3106;1520;3117;5721;3309;6890;3109;567;3112;972;3105	14	ENSG00000204287;ENSG00000232810;ENSG00000231389;ENSG00000234745;ENSG00000163131;ENSG00000196735;ENSG00000100911;ENSG00000044574;ENSG00000168394;ENSG00000242574;ENSG00000166710;ENSG00000126803;ENSG00000241106;ENSG00000019582;ENSG00000206503	15	ENSG00000126803	1	3306	1
KEGG pathway	Asthma	5310	8	2.58	0.0386	HLA-DRA;TNF;HLA-DPA1;HLA-DQA1;CD40LG;MS4A2;HLA-DMB;HLA-DOB	3122;7124;3113;3117;959;2206;3109;3112	ENSG00000204287;ENSG00000232810;ENSG00000231389;ENSG00000196735;ENSG00000102245;ENSG00000149534;ENSG00000242574;ENSG00000241106	ENSG00000204287;ENSG00000232810;ENSG00000231389;ENSG00000196735;ENSG00000102245;ENSG00000149534;ENSG00000242574;ENSG00000241106	8	ENSG00000204287;ENSG00000232810;ENSG00000231389;ENSG00000196735;ENSG00000102245;ENSG00000149534;ENSG00000242574;ENSG00000241106	8	3122;7124;3113;3117;959;2206;3109;3112	8	ENSG00000204287;ENSG00000232810;ENSG00000231389;ENSG00000196735;ENSG00000102245;ENSG00000149534;ENSG00000242574;ENSG00000241106	8		0		0
KEGG pathway	Amoebiasis	5146	25	1.64	0.0402	LAMA4;TNF;COL5A2;COL4A4;SERPINB10;ACTN2;CD14;CSF2;ARG1;COL3A1;GNA14;ITGB2;IL12A;PRKCG;LAMA3;PRKCB;IL8;COL5A1;TGFB3;LAMB2;COL1A2;TLR4;NOS2;PIK3CG;C9	3910;7124;1290;1286;5273;88;929;1437;383;1281;9630;3689;3592;5582;3909;5579;3576;1289;7043;3913;1278;7099;4843;5294;735	ENSG00000112769;ENSG00000232810;ENSG00000204262;ENSG00000081052;ENSG00000242550;ENSG00000077522;ENSG00000170458;ENSG00000164400;ENSG00000118520;ENSG00000168542;ENSG00000156049;ENSG00000160255;ENSG00000168811;ENSG00000126583;ENSG00000053747;ENSG00000166501;ENSG00000169429;ENSG00000130635;ENSG00000119699;ENSG00000172037;ENSG00000164692;ENSG00000136869;ENSG00000007171;ENSG00000105851;ENSG00000113600	ENSG00000112769;ENSG00000232810;ENSG00000204262;ENSG00000081052;ENSG00000242550;ENSG00000077522;ENSG00000170458;ENSG00000164400;ENSG00000118520;ENSG00000168542;ENSG00000156049;ENSG00000160255;ENSG00000168811;ENSG00000126583;ENSG00000053747;ENSG00000166501;ENSG00000169429;ENSG00000130635;ENSG00000119699;ENSG00000172037;ENSG00000164692;ENSG00000136869;ENSG00000007171;ENSG00000105851;ENSG00000113600	25	ENSG00000232810;ENSG00000081052;ENSG00000242550;ENSG00000170458;ENSG00000164400;ENSG00000118520;ENSG00000160255;ENSG00000168811;ENSG00000053747;ENSG00000166501;ENSG00000169429;ENSG00000136869;ENSG00000007171;ENSG00000105851;ENSG00000113600	15	7124;1286;5273;929;1437;383;3689;3592;3909;5579;3576;7099;4843;5294;735	15	ENSG00000112769;ENSG00000232810;ENSG00000204262;ENSG00000081052;ENSG00000242550;ENSG00000077522;ENSG00000170458;ENSG00000164400;ENSG00000118520;ENSG00000168542;ENSG00000156049;ENSG00000160255;ENSG00000168811;ENSG00000126583;ENSG00000053747;ENSG00000166501;ENSG00000169429;ENSG00000130635;ENSG00000119699;ENSG00000172037;ENSG00000164692;ENSG00000136869;ENSG00000007171;ENSG00000105851;ENSG00000113600	25	ENSG00000112769;ENSG00000204262;ENSG00000077522;ENSG00000168542;ENSG00000156049;ENSG00000126583;ENSG00000130635;ENSG00000119699;ENSG00000172037;ENSG00000164692	10	3910;1290;88;1281;9630;5582;1289;7043;3913;1278	10
KEGG pathway	Protein digestion and absorption	4974	19	1.75	0.0454	SLC7A7;COL6A2;COL5A2;SLC36A1;COL4A4;ATP1A4;PGA4;COL14A1;COL3A1;SLC1A1;SLC8A1;KCNE3;COL6A1;COL5A1;COL15A1;DPP4;COL1A2;ACE2;MME	9056;1292;1290;206358;1286;480;643847;7373;1281;6505;6546;10008;1291;1289;1306;1803;1278;59272;4311	ENSG00000155465;ENSG00000142173;ENSG00000204262;ENSG00000123643;ENSG00000081052;ENSG00000132681;ENSG00000229183;ENSG00000187955;ENSG00000168542;ENSG00000106688;ENSG00000183023;ENSG00000175538;ENSG00000142156;ENSG00000130635;ENSG00000204291;ENSG00000197635;ENSG00000164692;ENSG00000130234;ENSG00000196549	ENSG00000155465;ENSG00000142173;ENSG00000204262;ENSG00000123643;ENSG00000081052;ENSG00000132681;ENSG00000229183;ENSG00000187955;ENSG00000168542;ENSG00000106688;ENSG00000183023;ENSG00000175538;ENSG00000142156;ENSG00000130635;ENSG00000204291;ENSG00000197635;ENSG00000164692;ENSG00000130234;ENSG00000196549	19	ENSG00000155465;ENSG00000123643;ENSG00000081052;ENSG00000132681;ENSG00000106688;ENSG00000196549	6	9056;206358;1286;480;6505;4311	6	ENSG00000155465;ENSG00000142173;ENSG00000204262;ENSG00000123643;ENSG00000081052;ENSG00000132681;ENSG00000229183;ENSG00000187955;ENSG00000168542;ENSG00000106688;ENSG00000183023;ENSG00000175538;ENSG00000142156;ENSG00000130635;ENSG00000204291;ENSG00000197635;ENSG00000164692;ENSG00000130234;ENSG00000196549	19	ENSG00000142173;ENSG00000204262;ENSG00000229183;ENSG00000187955;ENSG00000168542;ENSG00000183023;ENSG00000175538;ENSG00000142156;ENSG00000130635;ENSG00000204291;ENSG00000197635;ENSG00000164692;ENSG00000130234	13	1292;1290;643847;7373;1281;6546;10008;1291;1289;1306;1803;1278;59272	13
KEGG pathway	Arginine and proline metabolism	330	15	1.88	0.0474	CPS1;OTC;LAP3;GOT2;GLS2;CKMT1A;P4HA2;P4HA3;GOT1;CKMT2;ALDH18A1;OAT;ARG1;NOS2;CKM	1373;5009;51056;2806;27165;548596;8974;283208;2805;1160;5832;4942;383;4843;1158	ENSG00000021826;ENSG00000036473;ENSG00000002549;ENSG00000125166;ENSG00000135423;ENSG00000223572;ENSG00000072682;ENSG00000149380;ENSG00000120053;ENSG00000131730;ENSG00000059573;ENSG00000065154;ENSG00000118520;ENSG00000007171;ENSG00000104879	ENSG00000021826;ENSG00000036473;ENSG00000002549;ENSG00000125166;ENSG00000135423;ENSG00000223572;ENSG00000072682;ENSG00000149380;ENSG00000120053;ENSG00000131730;ENSG00000059573;ENSG00000065154;ENSG00000118520;ENSG00000007171;ENSG00000104879	15	ENSG00000002549;ENSG00000223572;ENSG00000149380;ENSG00000118520;ENSG00000007171	5	51056;548596;283208;383;4843	5	ENSG00000021826;ENSG00000036473;ENSG00000002549;ENSG00000125166;ENSG00000135423;ENSG00000223572;ENSG00000072682;ENSG00000149380;ENSG00000120053;ENSG00000131730;ENSG00000059573;ENSG00000065154;ENSG00000118520;ENSG00000007171;ENSG00000104879	15	ENSG00000021826;ENSG00000036473;ENSG00000125166;ENSG00000135423;ENSG00000072682;ENSG00000120053;ENSG00000131730;ENSG00000059573;ENSG00000065154;ENSG00000104879	10	1373;5009;2806;27165;8974;2805;1160;5832;4942;1158	10

## Sheet: Disease
Class	Description	Accession	Gene count	Enrichment	P value	Gene names	Gene IDs	Source ID	Source ID	Total count	Up (Ensembl)	Gene count	Up (Entrez)	Gene count	Source ID	Total count	Down (Ensembl)	Gene count	Down (Entrez)	Gene count
disease	Immune System Diseases	DB_ID:PA444602	139	1.99	1.37e-15	CCL19;CD40LG;CD3E;PHRF1;MS4A2;TAP1;SLAMF7;GATA3;SCGB1A1;IL18;IL1A;GZMB;GRAMD1B;CD5;IDO1;HLA-DPA1;IL12A;SH2D1A;PSMB8;CD247;TLR4;RASGRP1;C3;DEFA4;ITGB7;COL4A3;SELE;IL2;BTK;CBLB;HLA-DMB;TNFSF10;ITGB2;APOH;CD68;IL8;NOD2;DPP4;VCAM1;HLA-DRA;TAGAP;ALOX5AP;NFKBIE;CD3G;SP110;C5;TNFSF8;CXCR6;CD27;SPINK5;IL18R1;FCRL1;CD244;AQP4;NCF1;CD3D;PRF1;CXCL13;CTLA4;STAT4;CD79B;LMO2;CD38;ADRB2;IRF5;FCGR3A;CR1;NFKBIA;I…	6363;959;916;57661;2206;6890;57823;2625;7356;3606;3552;3002;57476;921;3620;3113;3592;4068;5696;919;7099;10125;718;1669;3695;1285;6401;3558;695;868;3109;8743;3689;350;968;3576;64127;1803;7412;3122;117289;241;4794;917;3431;727;944;10663;939;11005;8809;115350;51744;361;653361;915;5551;10563;1493;6775;974;4005;952;154;3663;2214;1378;4792;10068;51091;1118;64135;4843;4311;3659;10163;3600;6375;7148;1555…	ENSG00000172724;ENSG00000102245;ENSG00000198851;ENSG00000070047;ENSG00000149534;ENSG00000168394;ENSG00000026751;ENSG00000107485;ENSG00000149021;ENSG00000150782;ENSG00000115008;ENSG00000100453;ENSG00000023171;ENSG00000110448;ENSG00000131203;ENSG00000231389;ENSG00000168811;ENSG00000183918;ENSG00000204264;ENSG00000198821;ENSG00000136869;ENSG00000172575;ENSG00000125730;ENSG00000164821;ENSG00000139626…	ENSG00000172724;ENSG00000102245;ENSG00000198851;ENSG00000070047;ENSG00000149534;ENSG00000168394;ENSG00000026751;ENSG00000107485;ENSG00000149021;ENSG00000150782;ENSG00000115008;ENSG00000100453;ENSG00000023171;ENSG00000110448;ENSG00000131203;ENSG00000231389;ENSG00000168811;ENSG00000183918;ENSG00000204264;ENSG00000198821;ENSG00000136869;ENSG00000172575;ENSG00000125730;ENSG00000164821;ENSG00000139626…	139	ENSG00000172724;ENSG00000102245;ENSG00000198851;ENSG00000070047;ENSG00000149534;ENSG00000168394;ENSG00000026751;ENSG00000107485;ENSG00000149021;ENSG00000150782;ENSG00000115008;ENSG00000100453;ENSG00000023171;ENSG00000110448;ENSG00000131203;ENSG00000231389;ENSG00000168811;ENSG00000183918;ENSG00000204264;ENSG00000198821;ENSG00000136869;ENSG00000172575;ENSG00000125730;ENSG00000164821;ENSG00000139626…	130	6363;959;916;57661;2206;6890;57823;2625;7356;3606;3552;3002;57476;921;3620;3113;3592;4068;5696;919;7099;10125;718;1669;3695;1285;3558;695;868;3109;8743;3689;968;3576;64127;7412;3122;117289;241;4794;917;3431;727;944;10663;939;8809;115350;51744;361;653361;915;5551;10563;1493;6775;974;4005;952;154;3663;2214;1378;4792;10068;51091;1118;64135;4843;4311;3659;10163;3600;6375;1555;81793;6288;4067;6491;709…	130	ENSG00000172724;ENSG00000102245;ENSG00000198851;ENSG00000070047;ENSG00000149534;ENSG00000168394;ENSG00000026751;ENSG00000107485;ENSG00000149021;ENSG00000150782;ENSG00000115008;ENSG00000100453;ENSG00000023171;ENSG00000110448;ENSG00000131203;ENSG00000231389;ENSG00000168811;ENSG00000183918;ENSG00000204264;ENSG00000198821;ENSG00000136869;ENSG00000172575;ENSG00000125730;ENSG00000164821;ENSG00000139626…	139	ENSG00000007908;ENSG00000091583;ENSG00000197635;ENSG00000133710;ENSG00000168477;ENSG00000137364;ENSG00000171155;ENSG00000076248;ENSG00000197208	9	6401;350;1803;11005;7148;7172;29071;7374;6583	9
disease	Infection	DB_ID:PA444614	106	2	1.04e-11	CCL19;IL15;CD40LG;CD3E;DNAJC3;IFI44;TAP1;IL18;SAA1;IL1A;MAPK14;IDO1;HLA-DPA1;IL12A;SH2D1A;PSMB8;TLR3;IL1RN;ITGAX;NFKB2;CASP8;RAB33A;TLR4;C3;DEFA4;ITGB7;ITGAL;CASP9;HSPA5;IL2;HLA-DMB;TNFSF10;PRKCQ;CD14;CAMP;IL22;PSMB9;HCK;FLVCR1;CXADR;ITGB2;CXCL10;PTGS2;SLC25A4;HLA-DQB2;IL8;STAT1;TUBA8;NOD2;IRF7;TNPO1;HLA-DRA;CD1B;DDX58;CLDN1;ACTC1;CX3CR1;CD3G;SP110;SELL;C5;CXCR6;GZMK;CD1A;HLA-A;XPR1;DHX58;NCF1;SA…	6363;3600;959;916;5611;10561;6890;3606;6288;3552;1432;3620;3113;3592;4068;5696;7098;3557;3687;4791;841;9363;7099;718;1669;3695;3683;842;3309;3558;3109;8743;5588;929;820;50616;5698;3055;28982;1525;3689;3627;5743;291;3120;3576;6772;51807;64127;3665;3842;3122;910;23586;9076;70;1524;917;3431;6402;727;10663;3003;909;3105;9213;79132;653361;25939;10379;59;915;834;5551;6280;5694;80329;7124;653509;10563;1…	ENSG00000172724;ENSG00000164136;ENSG00000102245;ENSG00000198851;ENSG00000102580;ENSG00000137965;ENSG00000168394;ENSG00000150782;ENSG00000173432;ENSG00000115008;ENSG00000112062;ENSG00000131203;ENSG00000231389;ENSG00000168811;ENSG00000183918;ENSG00000204264;ENSG00000164342;ENSG00000136689;ENSG00000140678;ENSG00000077150;ENSG00000064012;ENSG00000134594;ENSG00000136869;ENSG00000125730;ENSG00000164821…	ENSG00000172724;ENSG00000164136;ENSG00000102245;ENSG00000198851;ENSG00000102580;ENSG00000137965;ENSG00000168394;ENSG00000150782;ENSG00000173432;ENSG00000115008;ENSG00000112062;ENSG00000131203;ENSG00000231389;ENSG00000168811;ENSG00000183918;ENSG00000204264;ENSG00000164342;ENSG00000136689;ENSG00000140678;ENSG00000077150;ENSG00000064012;ENSG00000134594;ENSG00000136869;ENSG00000125730;ENSG00000164821…	106	ENSG00000172724;ENSG00000164136;ENSG00000102245;ENSG00000198851;ENSG00000102580;ENSG00000137965;ENSG00000168394;ENSG00000150782;ENSG00000173432;ENSG00000115008;ENSG00000112062;ENSG00000131203;ENSG00000231389;ENSG00000168811;ENSG00000183918;ENSG00000204264;ENSG00000164342;ENSG00000136689;ENSG00000140678;ENSG00000077150;ENSG00000064012;ENSG00000136869;ENSG00000125730;ENSG00000164821;ENSG00000139626…	98	6363;3600;959;916;5611;10561;6890;3606;6288;3552;1432;3620;3113;3592;4068;5696;7098;3557;3687;4791;841;7099;718;1669;3695;3683;842;3309;3558;3109;8743;5588;929;820;50616;5698;3055;28982;1525;3689;3627;3120;3576;6772;64127;3665;3842;3122;910;23586;9076;1524;917;3431;6402;727;10663;3003;909;3105;9213;79132;653361;25939;10379;915;834;5551;6280;80329;7124;653509;10563;1493;64581;3932;3117;729230;1437…	98	ENSG00000172724;ENSG00000164136;ENSG00000102245;ENSG00000198851;ENSG00000102580;ENSG00000137965;ENSG00000168394;ENSG00000150782;ENSG00000173432;ENSG00000115008;ENSG00000112062;ENSG00000131203;ENSG00000231389;ENSG00000168811;ENSG00000183918;ENSG00000204264;ENSG00000164342;ENSG00000136689;ENSG00000140678;ENSG00000077150;ENSG00000064012;ENSG00000134594;ENSG00000136869;ENSG00000125730;ENSG00000164821…	106	ENSG00000134594;ENSG00000073756;ENSG00000151729;ENSG00000183785;ENSG00000159251;ENSG00000107796;ENSG00000142507;ENSG00000130234	8	9363;5743;291;51807;70;59;5694;59272	8
disease	Chronic Disease	DB_ID:PA443731	79	2.19	4.36e-11	ABCA3;LCN2;CD40LG;NPHS2;SCGB1A1;IL18;TLR10;IL1A;HMOX1;GRAMD1B;CD5;ANGPTL2;IL12A;MMP7;TLR3;CTGF;COL5A1;SFTPC;IL1RN;TAC1;TLR4;IL23R;C3;COL4A3;IL2;MMP1;CD14;CAMP;IL22;VEGFA;KL;PON1;ADM;MS4A1;PTGS2;CXCL10;MMP8;IL8;NOD2;TNFSF15;PDILT;SERPINE2;ACE;CX3CR1;TNFSF13B;CD27;ICOS;HLA-A;IRF4;NCF1;SFTPB;PRF1;S100A9;TNF;SFTPA1;CTLA4;WDR72;HLA-DQA1;GCLC;COL4A4;CCR2;CNDP1;CD38;ADRB2;GP2;FCGR3A;HHIP;HLA-B;AGTR1;NOD…	21;3934;959;7827;7356;3606;81793;3552;3162;57476;921;23452;3592;4316;7098;1490;1289;6440;3557;6863;7099;149233;718;1285;3558;4312;929;820;50616;7422;9365;5444;133;931;5743;3627;4317;3576;64127;9966;204474;5270;1636;1524;10673;939;29851;3105;3662;653361;6439;5551;6280;7124;653509;1493;256764;3117;2729;1286;729230;84735;952;154;2813;2214;64399;3106;185;10392;7535;7139;1118;4843;6583;2876;4867;5741;…	ENSG00000167972;ENSG00000148346;ENSG00000102245;ENSG00000116218;ENSG00000149021;ENSG00000150782;ENSG00000174123;ENSG00000115008;ENSG00000100292;ENSG00000023171;ENSG00000110448;ENSG00000136859;ENSG00000168811;ENSG00000137673;ENSG00000164342;ENSG00000118523;ENSG00000130635;ENSG00000168484;ENSG00000136689;ENSG00000006128;ENSG00000136869;ENSG00000162594;ENSG00000125730;ENSG00000169031;ENSG00000109471…	ENSG00000167972;ENSG00000148346;ENSG00000102245;ENSG00000116218;ENSG00000149021;ENSG00000150782;ENSG00000174123;ENSG00000115008;ENSG00000100292;ENSG00000023171;ENSG00000110448;ENSG00000136859;ENSG00000168811;ENSG00000137673;ENSG00000164342;ENSG00000118523;ENSG00000130635;ENSG00000168484;ENSG00000136689;ENSG00000006128;ENSG00000136869;ENSG00000162594;ENSG00000125730;ENSG00000169031;ENSG00000109471…	79	ENSG00000167972;ENSG00000148346;ENSG00000102245;ENSG00000149021;ENSG00000150782;ENSG00000174123;ENSG00000115008;ENSG00000100292;ENSG00000023171;ENSG00000110448;ENSG00000168811;ENSG00000137673;ENSG00000164342;ENSG00000168484;ENSG00000136689;ENSG00000006128;ENSG00000136869;ENSG00000162594;ENSG00000125730;ENSG00000169031;ENSG00000109471;ENSG00000196611;ENSG00000170458;ENSG00000164047;ENSG00000127318…	65	21;3934;959;7356;3606;81793;3552;3162;57476;921;3592;4316;7098;6440;3557;6863;7099;149233;718;1285;3558;4312;929;820;50616;7422;5444;931;3627;3576;64127;5270;1636;1524;10673;939;29851;3105;3662;653361;6439;5551;6280;7124;653509;1493;256764;3117;2729;1286;729230;84735;952;154;2813;2214;64399;3106;10392;7535;1118;4843;2876;5741;3659	65	ENSG00000167972;ENSG00000148346;ENSG00000102245;ENSG00000116218;ENSG00000149021;ENSG00000150782;ENSG00000174123;ENSG00000115008;ENSG00000100292;ENSG00000023171;ENSG00000110448;ENSG00000136859;ENSG00000168811;ENSG00000137673;ENSG00000164342;ENSG00000118523;ENSG00000130635;ENSG00000168484;ENSG00000136689;ENSG00000006128;ENSG00000136869;ENSG00000162594;ENSG00000125730;ENSG00000169031;ENSG00000109471…	79	ENSG00000116218;ENSG00000136859;ENSG00000118523;ENSG00000130635;ENSG00000133116;ENSG00000148926;ENSG00000073756;ENSG00000118113;ENSG00000181634;ENSG00000169340;ENSG00000144891;ENSG00000118194;ENSG00000197208;ENSG00000144061	14	7827;23452;1490;1289;9365;133;5743;4317;9966;204474;185;7139;6583;4867	14
disease	Bronchiolitis	DB_ID:PA443567	63	2.37	1.16e-10	HLA-DRA;CCL19;IL15;CD40LG;MS4A2;TAP1;GATA3;SELL;C5;SCGB1A1;IL18;TLR10;IL1A;ARG1;GZMB;IL18R1;IDO1;IL12A;PSMB8;MMP7;TLR3;SFTPB;COL5A1;SFTPC;IRF9;IL17RA;IL1RN;TAC1;NFKB2;TLR4;PRF1;CASP1;IL23R;TNF;C3;SFTPA1;CXCL13;CTLA4;GZMA;STAT4;IL2;CCR2;PDLIM4;CD14;ADRB2;CSF2;IL22;FOS;IRF5;ITGB2;CXCL5;PTGS2;MUC1;HNMT;NFKBIA;IL8;STAT1;NOD2;VCAM1;NOS2;IL13RA2;HDC;IRF1	3122;6363;3600;959;2206;6890;2625;6402;727;7356;3606;81793;3552;383;3002;8809;3620;3592;5696;4316;7098;6439;1289;6440;10379;23765;3557;6863;4791;7099;5551;834;149233;7124;718;653509;10563;1493;3001;6775;3558;729230;8572;929;154;1437;50616;2353;3663;3689;6374;5743;4582;3176;4792;3576;6772;64127;7412;4843;3598;3067;3659	ENSG00000204287;ENSG00000172724;ENSG00000164136;ENSG00000102245;ENSG00000149534;ENSG00000168394;ENSG00000107485;ENSG00000188404;ENSG00000106804;ENSG00000149021;ENSG00000150782;ENSG00000174123;ENSG00000115008;ENSG00000118520;ENSG00000100453;ENSG00000115604;ENSG00000131203;ENSG00000168811;ENSG00000204264;ENSG00000137673;ENSG00000164342;ENSG00000168878;ENSG00000130635;ENSG00000168484;ENSG00000213928…	ENSG00000204287;ENSG00000172724;ENSG00000164136;ENSG00000102245;ENSG00000149534;ENSG00000168394;ENSG00000107485;ENSG00000188404;ENSG00000106804;ENSG00000149021;ENSG00000150782;ENSG00000174123;ENSG00000115008;ENSG00000118520;ENSG00000100453;ENSG00000115604;ENSG00000131203;ENSG00000168811;ENSG00000204264;ENSG00000137673;ENSG00000164342;ENSG00000168878;ENSG00000130635;ENSG00000168484;ENSG00000213928…	63	ENSG00000204287;ENSG00000172724;ENSG00000164136;ENSG00000102245;ENSG00000149534;ENSG00000168394;ENSG00000107485;ENSG00000188404;ENSG00000106804;ENSG00000149021;ENSG00000150782;ENSG00000174123;ENSG00000115008;ENSG00000118520;ENSG00000100453;ENSG00000115604;ENSG00000131203;ENSG00000168811;ENSG00000204264;ENSG00000137673;ENSG00000164342;ENSG00000168878;ENSG00000168484;ENSG00000213928;ENSG00000177663…	59	3122;6363;3600;959;2206;6890;2625;6402;727;7356;3606;81793;3552;383;3002;8809;3620;3592;5696;4316;7098;6439;6440;10379;23765;3557;6863;4791;7099;5551;834;149233;7124;718;653509;10563;1493;3001;6775;3558;729230;929;154;1437;50616;3663;3689;6374;4582;3176;4792;3576;6772;64127;7412;4843;3598;3067;3659	59	ENSG00000204287;ENSG00000172724;ENSG00000164136;ENSG00000102245;ENSG00000149534;ENSG00000168394;ENSG00000107485;ENSG00000188404;ENSG00000106804;ENSG00000149021;ENSG00000150782;ENSG00000174123;ENSG00000115008;ENSG00000118520;ENSG00000100453;ENSG00000115604;ENSG00000131203;ENSG00000168811;ENSG00000204264;ENSG00000137673;ENSG00000164342;ENSG00000168878;ENSG00000130635;ENSG00000168484;ENSG00000213928…	63	ENSG00000130635;ENSG00000131435;ENSG00000170345;ENSG00000073756	4	1289;8572;2353;5743	4
[truncated: 331 more rows]

## Sheet: GO-up
Class	Description	Accession	Gene count	Enrichment	P value	Gene names	Gene IDs	Source ID
biological process	immune response	GO:0006955	202	2.84	7.49e-47	PTAFR;CD200R1;UNC93B1;ADAMDEC1;LCN2;CCL19;CD40LG;CD3E;MS4A2;TNFAIP8L2;TAP1;SLAMF7;GATA3;S100A8;IL18;IL1A;MAPK14;IDO1;HLA-DPA1;IL12A;PSMB8;SH2D1A;MMP7;CD247;C1RL;TLR4;C3;DEFA4;ITGAL;ITGB7;GZMA;USP18;IL2;BTK;CBLB;HLA-DMB;TNFSF10;VEGFA;HCK;CD36;MEFV;CDK1;LCP1;CXADR;CXCL5;ITGB2;LEF1;NCKAP1L;KYNU;IL8;NOD2;PTK2B;VCAM1;CLU;VIPR1;HLA-DRA;DDX58;HCST;AMICA1;LGALS3;C6;A2M;CD3G;C5;TNFSF8;CD27;IL18R1;UBA7;PYC…	5724;131450;81622;27299;3934;6363;959;916;2206;79626;6890;57823;2625;6279;3606;3552;1432;3620;3113;3592;5696;4068;4316;919;51279;7099;718;1669;3683;3695;3001;11274;3558;695;868;3109;8743;7422;3055;948;4210;983;3936;1525;6374;3689;51176;3071;8942;3576;64127;2185;7412;1191;7433;3122;23586;10870;120425;3958;729;2;917;727;944;939;8809;7318;29108;653361;361;10379;50852;915;5551;834;735;4602;1493;10563…	ENSG00000169403;ENSG00000163606;ENSG00000110057;ENSG00000134028;ENSG00000148346;ENSG00000172724;ENSG00000102245;ENSG00000198851;ENSG00000149534;ENSG00000163154;ENSG00000168394;ENSG00000026751;ENSG00000107485;ENSG00000143546;ENSG00000150782;ENSG00000115008;ENSG00000112062;ENSG00000131203;ENSG00000231389;ENSG00000168811;ENSG00000204264;ENSG00000183918;ENSG00000137673;ENSG00000198821;ENSG00000139178…
[truncated: 119 more rows]

## Sheet: KEGG-up
Class	Description	Accession	Gene count	Enrichment	P value	Gene names	Gene IDs	Source ID
KEGG pathway	Rheumatoid arthritis	5323	25	3.74	1.06e-07	TNF;HLA-DRA;ITGAL;CTLA4;HLA-DQA1;IL15;ATP6V1A;LTB;TNFSF13B;HLA-DMB;MMP1;IL18;CSF2;VEGFA;IL1A;HLA-DPA1;CXCL5;ITGB2;ATP6V1F;IL8;ATP6V1G3;ATP6V0A4;ATP6V0D2;TLR4;HLA-DOB	7124;3122;3683;1493;3117;3600;523;4050;10673;3109;4312;3606;1437;7422;3552;3113;6374;3689;9296;3576;127124;50617;245972;7099;3112	ENSG00000232810;ENSG00000204287;ENSG00000005844;ENSG00000163599;ENSG00000196735;ENSG00000164136;ENSG00000114573;ENSG00000227507;ENSG00000102524;ENSG00000242574;ENSG00000196611;ENSG00000150782;ENSG00000164400;ENSG00000112715;ENSG00000115008;ENSG00000231389;ENSG00000163735;ENSG00000160255;ENSG00000128524;ENSG00000169429;ENSG00000151418;ENSG00000105929;ENSG00000147614;ENSG00000136869;ENSG00000241106
[truncated: 36 more rows]

## Sheet: Disease-up
Class	Description	Accession	Gene count	Enrichment	P value	Gene names	Gene IDs	Source ID
[truncated: 421 more rows]

## Sheet: GO-down
Class	Description	Accession	Gene count	Enrichment	P value	Gene names	Gene IDs	Source ID
[truncated: 120 more rows]

## Sheet: KEGG-down
Class	Description	Accession	Gene count	Enrichment	P value	Gene names	Gene IDs	Source ID
[truncated: 8 more rows]

[truncated: 1 more sheets: Disease-down]
